# Supplementary material for: Effects of microcompartmentation on flux distribution and metabolic pools in Chlamydomonas reinhardtii chloroplasts
Source: eLife journal article supplement (doi:10.7554/elife.37960), 2018-10-11
Supplement: supp [file elife-37960-supp-v1.zip]

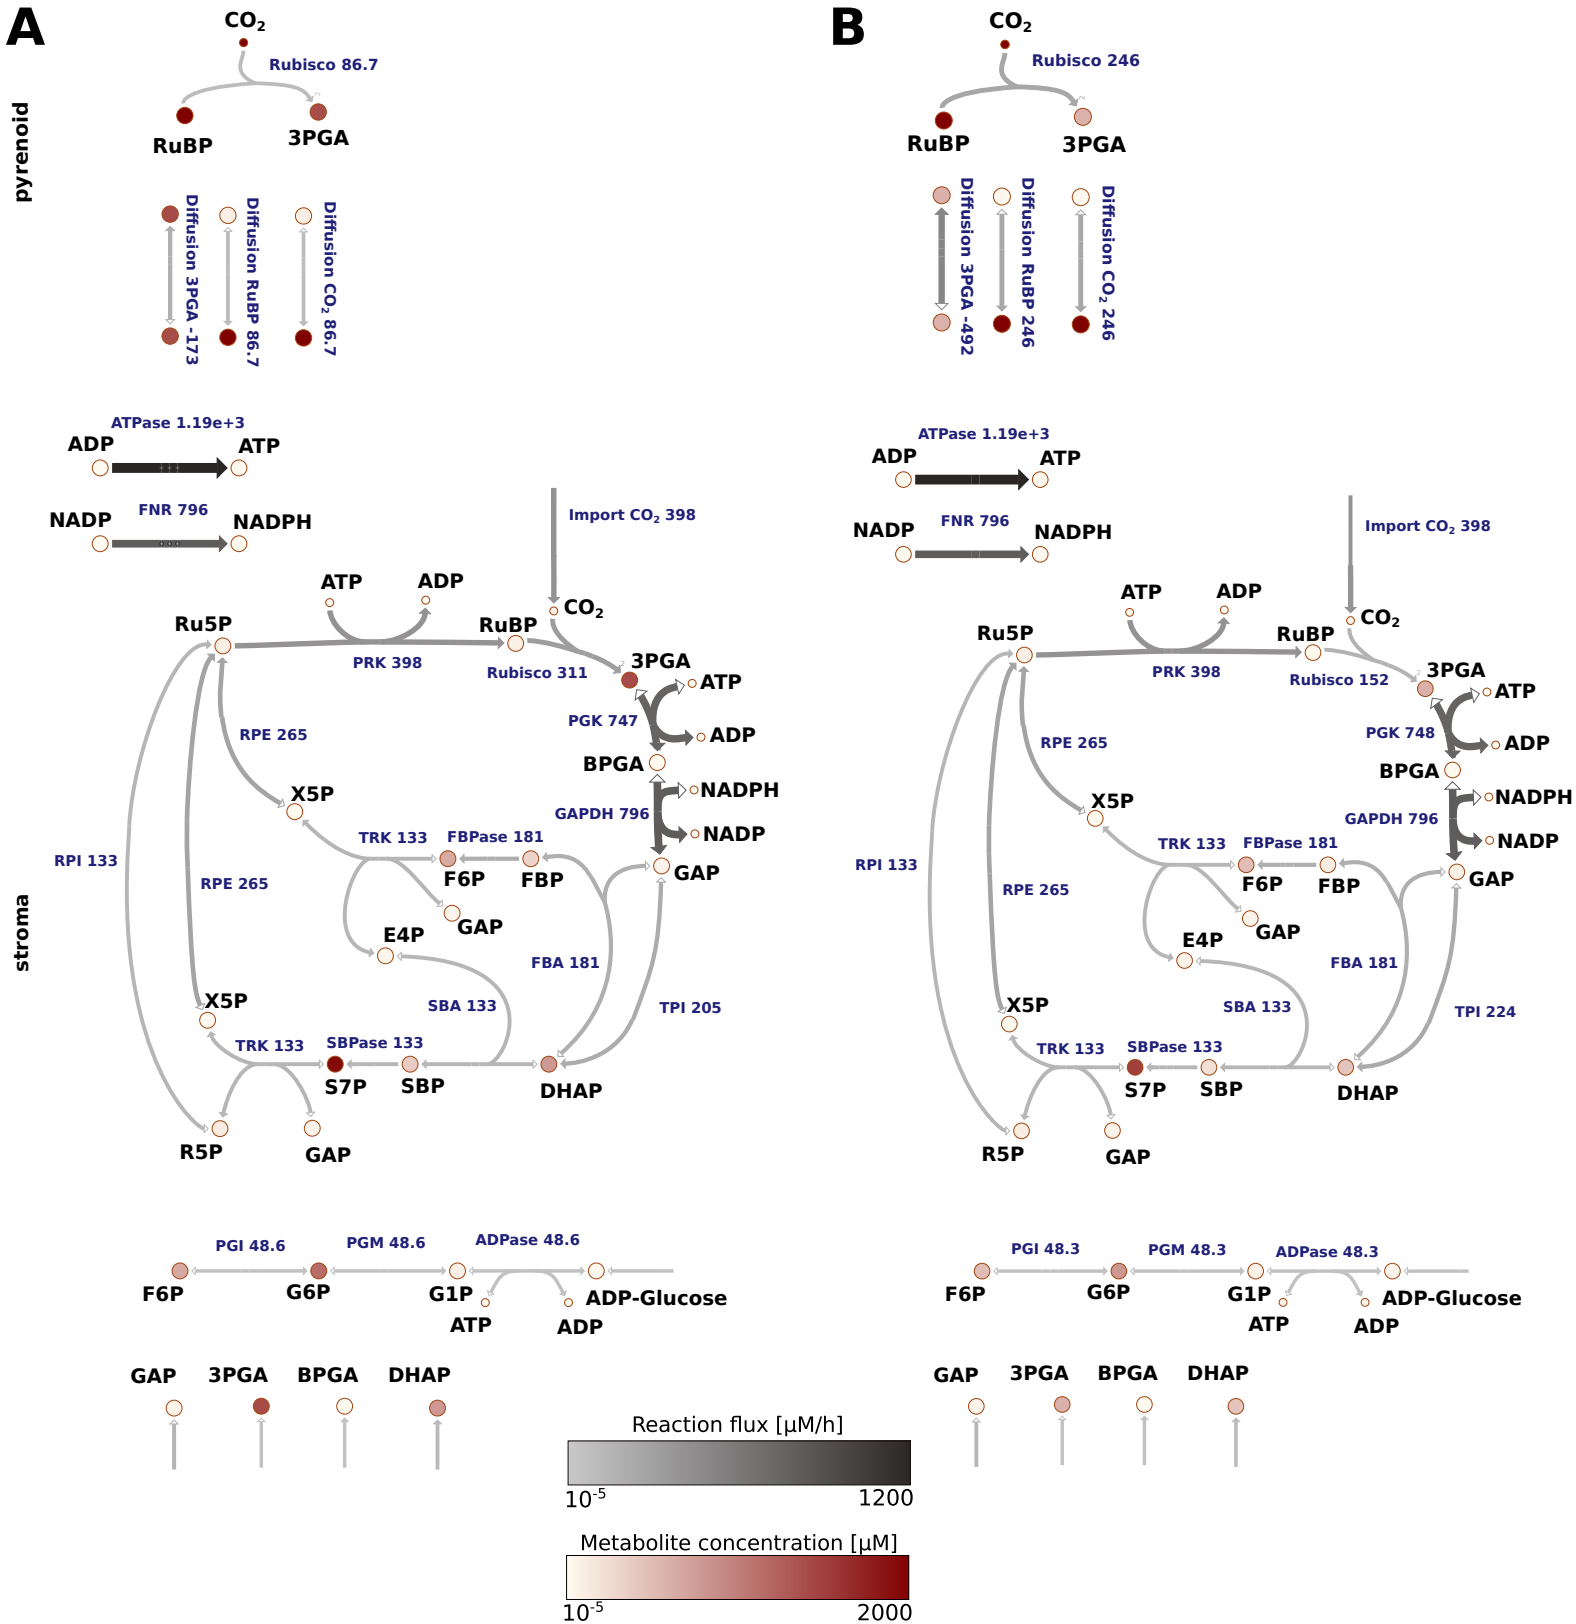

**Figure 6-figure supplement 1. Reaction flux estimated for *Chlamydomonas reinhardtii* cells grown under non-CCM (HC; A) and CCM-induced (LC\*; B) conditions.** The average values of the flux and total metabolite concentration are indicated by a colour code (see legend) and size of the arrows (denoting the reactions). The actual values are provided in Supplementary files 5 and 6. The main difference observed between HC and LC\* conditions was an increased flux through Rubisco in the pyrenoid under LC\* and an increase in the flux of RuBP and 3PGA into the pyrenoid and from the pyrenoid, respectively, under LC\*. The flux through the Calvin-Benson cycle located in the stroma, however, was similar under both conditions.
