# Supplementary material for: Effects of microcompartmentation on flux distribution and metabolic pools in Chlamydomonas reinhardtii chloroplasts
Source: eLife journal article supplement (doi:10.7554/elife.37960), 2018-10-11
Supplement: supp [file elife-37960-supp-v1.zip]

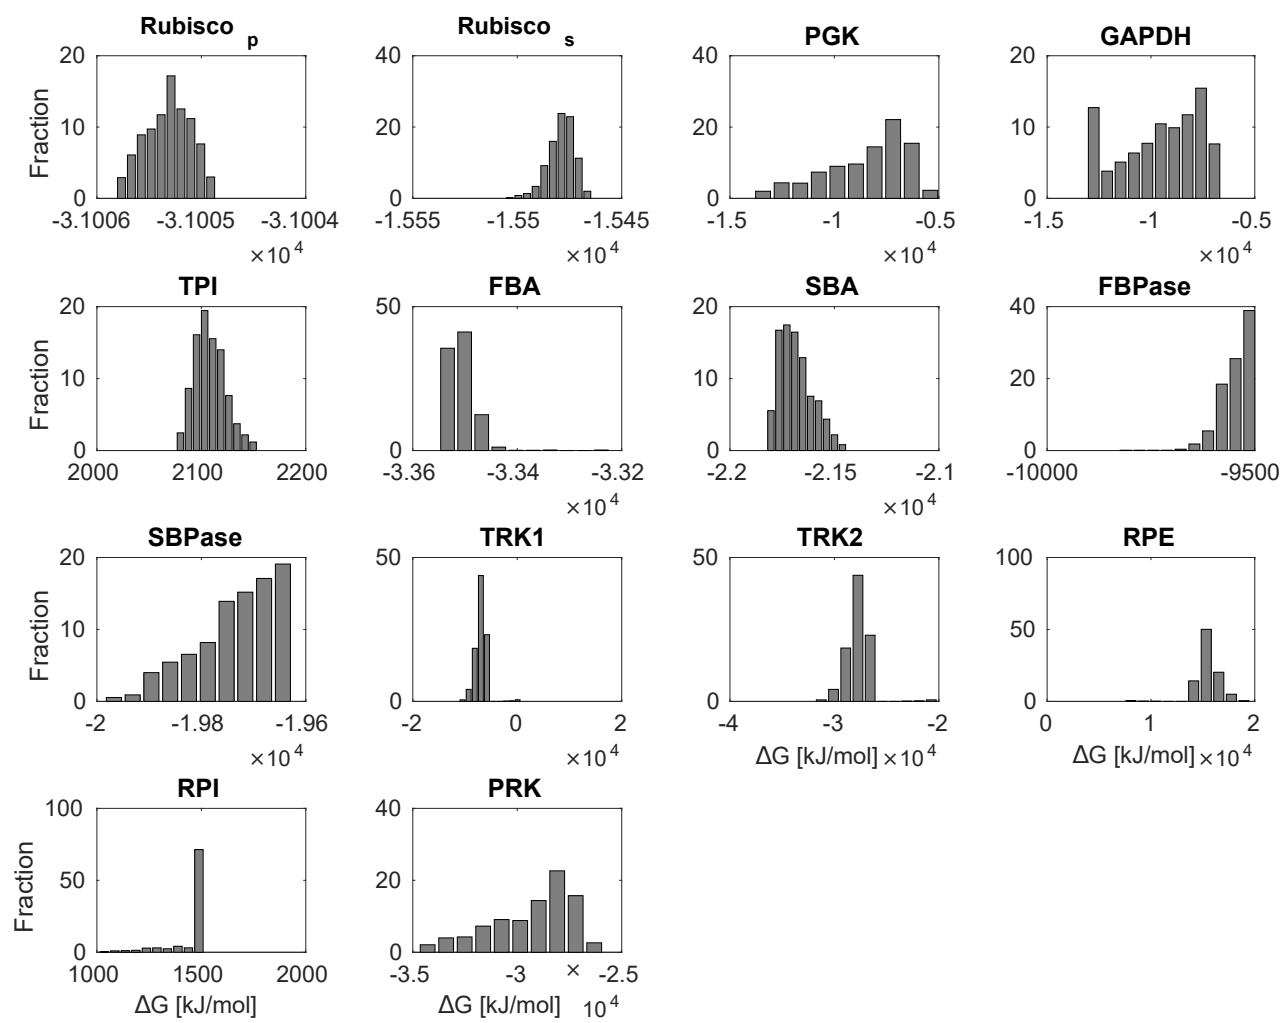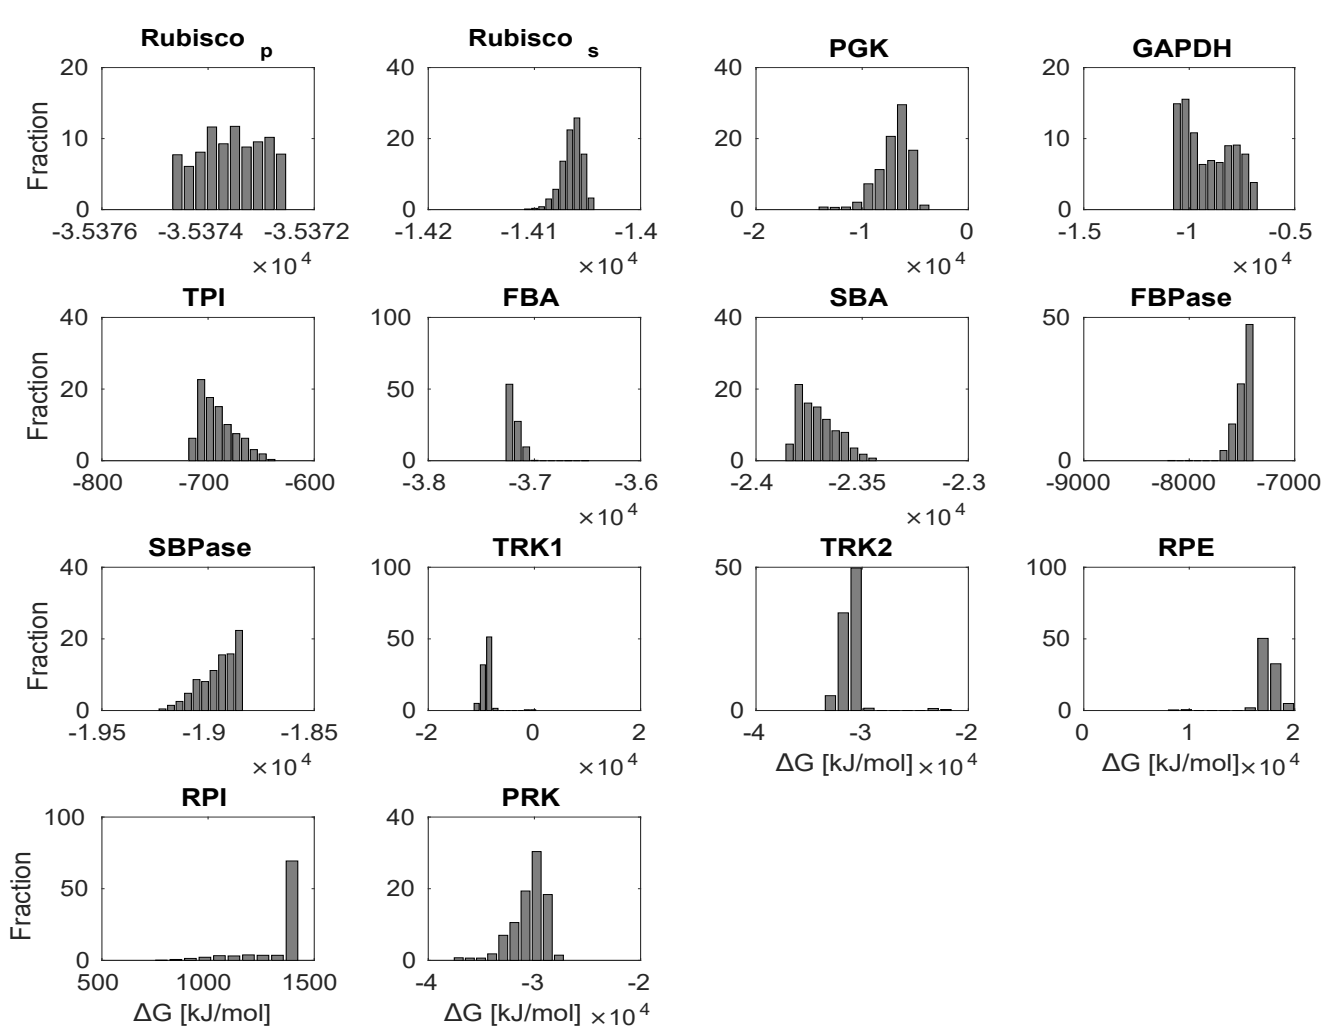

**Figure 5-figure supplement 1. Distribution of estimated  $\Delta G$  values for CBC metabolites over 1,000 sampled steady-state flux distributions under no-CCM (HC; A) and CCM-induced (LC\*; B) conditions. The estimated  $\Delta G$  was negative for all enzymes except RPE and RPI for which  $\Delta G > 0$ . In addition, TRK was found to be the only enzyme operating in both directions.**
