# Supplementary material for: Effects of microcompartmentation on flux distribution and metabolic pools in Chlamydomonas reinhardtii chloroplasts
Source: eLife journal article supplement (doi:10.7554/elife.37960), 2018-10-11
Supplement: supp [file elife-37960-supp-v1.zip]

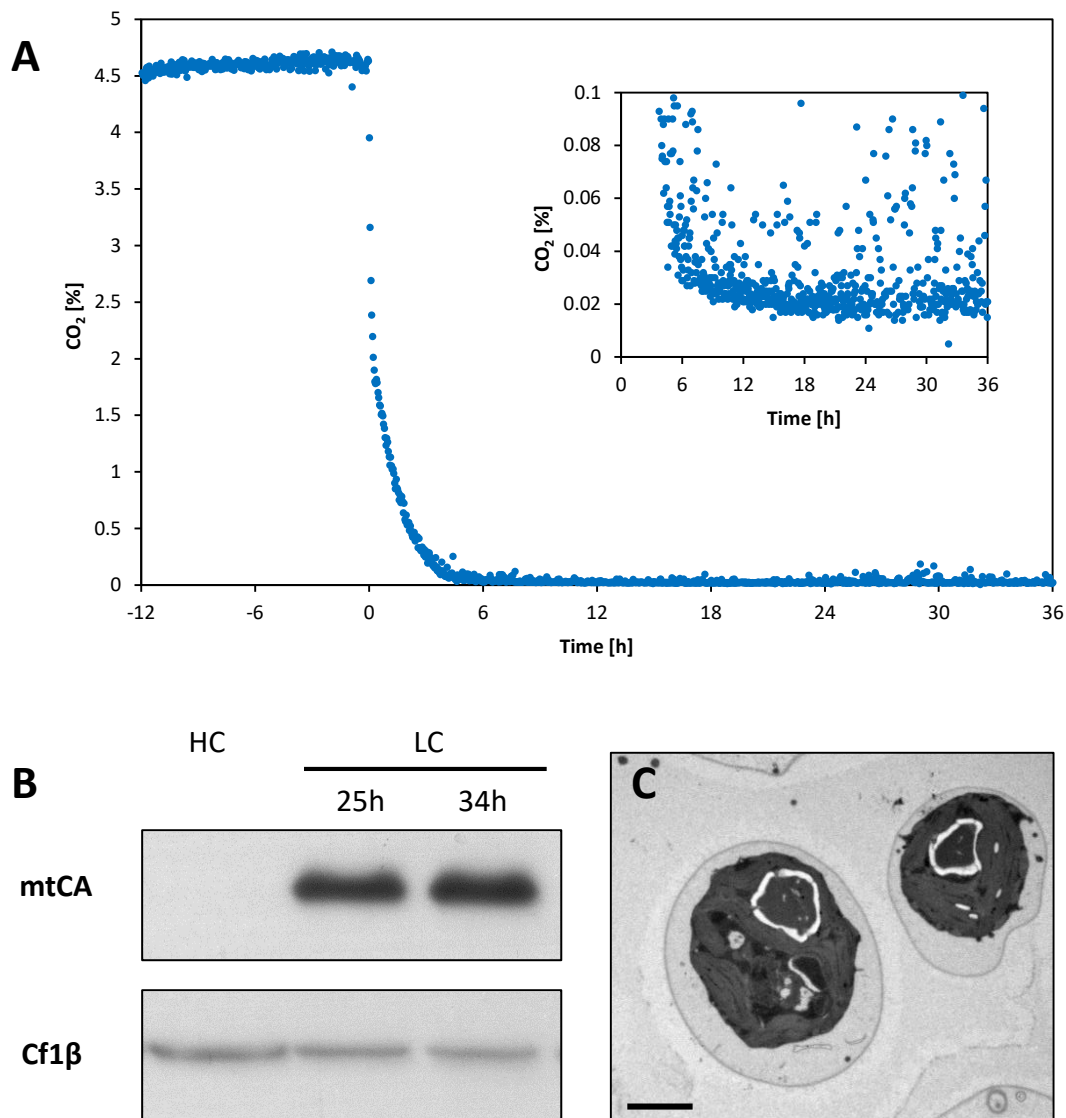

**Figure 2-figure supplement 1. Induction of carbon concentrating mechanism (CCM).**

*Chlamydomonas reinhardtii* CC1690 were grown at 46  $\mu\text{mol photons}\cdot\text{m}^{-2}\cdot\text{s}^{-1}$ , 24°C and bubbled with 5% CO<sub>2</sub> (HC) for two days at constant turbidity in a bioreactor. CO<sub>2</sub> in the outlet air of the bioreactor was measured continuously during a 48 h run (A). From time point zero onwards the culture was aerated with ambient air (0.039% CO<sub>2</sub>). The inserted graph shows the same CO<sub>2</sub> data at lower CO<sub>2</sub> concentrations. Cultures were harvested before (HC) and 25 and 34 h (LC) after low-CO<sub>2</sub> exposure for Western blot analysis (B). Protein amounts equivalent to 1  $\mu\text{g}$  chlorophyll were loaded per lane and separated by 12% SDS-PAGE before transferred to a nitrocellulose membrane for detection via chemiluminescence by an antiserum recognizing mtCA (AgriSera Cat# AS11 1737, RRID:AB\_10752086). Loading control: CF<sub>1</sub>β, β-subunit of the CF<sub>1</sub>-component of CF<sub>1</sub>F<sub>0</sub>-ATP synthase (AgriSera Cat# AS10 1590, RRID:AB\_10754669). Transmission electron microscopy (TEM) of cells exposed for 30 h to low CO<sub>2</sub> and 15 min to high CO<sub>2</sub> (LC\*; C). Cells were then quenched in the light for metabolite analysis by LC-MS/MS. Measure bar = 2  $\mu\text{m}$ .
