# Supplementary material for: Effects of microcompartmentation on flux distribution and metabolic pools in Chlamydomonas reinhardtii chloroplasts
Source: eLife journal article supplement (doi:10.7554/elife.37960), 2018-10-11
Supplement: supp [file elife-37960-supp-v1.zip]

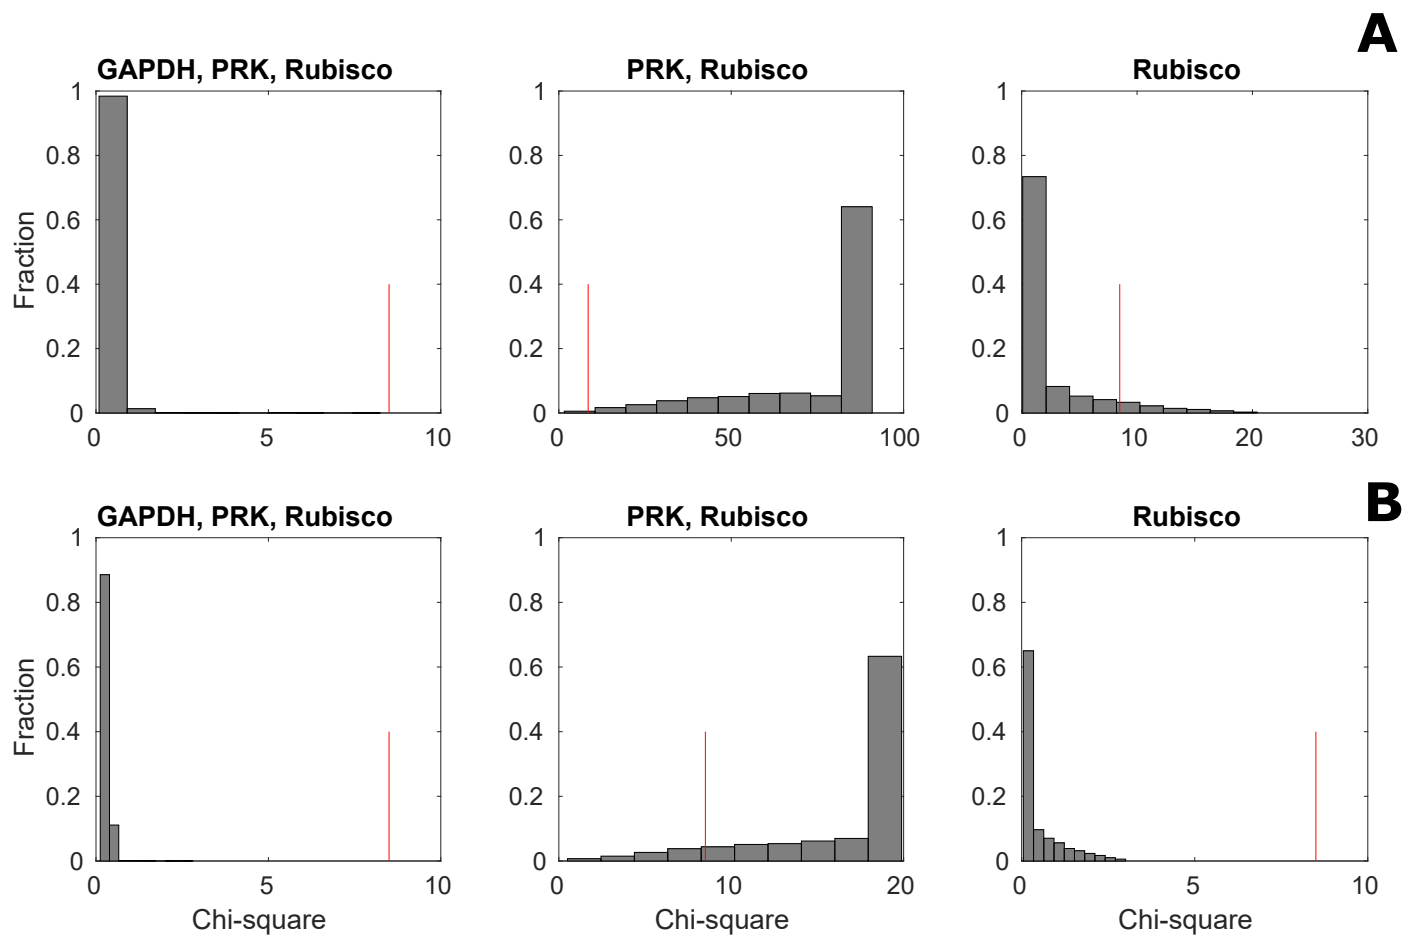

**Figure 4-figure supplement 1. Distribution of Chi-square statistic for 5,000 sampled steady-state flux distributions under three different assumptions.** Model predictions under non-CCM (HC, A) and CCM-induced (LC\*, B) conditions were validated using the Chi-square statistic between predicted and measured total concentration for 11 metabolites over 5,000 sampled steady-state flux distributions. The validation was done under three different assumptions: (i) activity of PRK, Rubisco and GAPDH, (ii) activity of PRK and Rubisco, and (iii) only activity of Rubisco in the pyrenoid. The red line shows the Chi-square statistic corresponding to a significance level of 0.05.
