# Supplementary material for: Effects of microcompartmentation on flux distribution and metabolic pools in Chlamydomonas reinhardtii chloroplasts
Source: eLife journal article supplement (doi:10.7554/elife.37960), 2018-10-11
Supplement: supp [file elife-37960-supp-v1.zip]

Archive with 12 entries (12 files):
- elife_poa_e37960_Figure_6_source_data_1.xlsx
- elife_poa_e37960_Transparent_Reporting_File.pdf
- elife_poa_e37960_Figure_2_figure_supplement_1.pdf
- elife_poa_e37960_Supplementary_File_1.xlsx
- elife_poa_e37960_Supplementary_File_4.xlsx
- elife_poa_e37960_Supplementary_File_2.xlsx
- elife_poa_e37960_Supplementary_File_3.xlsx
- elife_poa_e37960_Figure_6_figure_supplement_1.pdf
- elife_poa_e37960_Figure_4_figure_supplement_1.pdf
- elife_poa_e37960_Supplementary_File_5.xlsx
- elife_poa_e37960_Figure_5_figure_supplement_1.pdf
- elife_poa_e37960_Supplementary_File_6.xlsx
