# Supplementary material for: Effects of microcompartmentation on flux distribution and metabolic pools in Chlamydomonas reinhardtii chloroplasts
Source: eLife journal article supplement (doi:10.7554/elife.37960), 2018-10-11
Supplement: supp [file elife-37960-supp-v1.zip › elife_poa_e37960_Figure_6_source_data_1.xlsx]

## Sheet: Sheet1
Supplementary Table 7. Model predicted average metabolite concentration for Rubisco, PGK, RuBP, 3PGA and CO2 in stroma and pyrenoid, respectively. In addition the average reaction flux values for reactions involving RuBP and 3PGA, as well as, CO2 diffusion are presented. For further information see also Suplementary files 5 and 6.
Concentration [µM]
			HC		LC*
Microcompartment	Metabolite/Enzyme		average	standard deviation	average	standard deviation
stroma	Rubisco	free	47.7838	64.5917	12.7858	8.82976
		bound	53.6787	0.000609571	26.1862	0.00504309
	PGK	free	0.0168726	0.0217611	0.0112856	0.016808
		bound	9.72402	1.03999	9.68644	1.05859
	RuBP	free	0.0544466	0.0264546	0.0617372	0.0210091
		bound to Rubisco	53.6787	0.000609571	26.1862	0.00504309
	CO2	free	0.0536687	0.0261655	0.0627425	0.0220208
		bound to enzymes	53.6787	0.000609571	26.1862	0.00504309
	3PGA	free	844.003	5.23221e-12	545.038	8.30329e-12
		bound to PGK	9.70819	1.03402	9.67203	1.05382
pyrenoid	Rubisco	free	23.0407	31.5937	92.1323	107.487
		bound	1217.04	0.0496501	1896.87	0.225432
	PGK	free	0	0	0	0
		bound	0	0	0	0
	RuBP	free	0.0462891	0.0256877	0.0377471	0.0200768
		bound to Rubisco	1217.04	0.0496501	1896.87	0.225432
	CO2	free	0.0455192	0.0253925	0.0387535	0.0211012
		bound to enzymes	1217.04	0.0496501	1896.87	0.225432
	3PGA	free	844.003	5.23221e-12	545.038	8.30329e-12
		bound to PGK	0	0	0	0
Net flux [µM/s]
Microcompartment	Reaction description	Reaction name
stroma -> pyrenoid	Diffusion CO2 stroma to pyrenoidy	Diffusion CO2 stroma to pyrenoidy	86.6637	0.00353551	246.12	0.0292499
stroma	Rubisco	Rubisco carboxylase 2 s	311.336	0.00353551	151.88	0.0292499
stroma	PGK	Phosphoglycerate kinase 2 s	747.447	86.4976	747.7	90.8324
pyrenoid	Rubisco	Rubisco carboxylase 2 y	86.6637	0.00353551	246.12	0.0292499
pyrenoid	PGK	Phosphoglycerate kinase 2 y	0	0	0	0
stroma -> pyrenoid	Diffusion RuBP from stroma to pyrenoid	Diffusion RuBP	86.6637	0.00353551	246.12	0.0292499
stroma -> pyrenoid	Diffusion 3PGA from stroma to pyrenoid	Diffusion 3PGA	-173.327	0.00707103	-492.24	0.0584999
