# Supplementary material for: Effects of microcompartmentation on flux distribution and metabolic pools in Chlamydomonas reinhardtii chloroplasts
Source: eLife journal article supplement (doi:10.7554/elife.37960), 2018-10-11
Supplement: supp [file elife-37960-supp-v1.zip › elife_poa_e37960_Supplementary_File_1.xlsx]

## Sheet: A_CBC_reactions
Enzyme_abbreviation	Enzyme_full_name	Reaction_equation	Reversibility
Rubisco	Ribulose-1,5-bisphosphat-carboxylase/-oxygenase	CO2+RuBP+H2O => 2*3PGA+2H+	irreversible
PGK	Phosphoglycerate kinase	3PGA + ATP => BPGA + ADP	reversible
GAPDH	Glyceraldehyde-3-phosphate dehydrogenase	H++ BPGA + NADPH => GAP + NADP++Pi	reversible
TPI	Triosephosphate isomerase	GAP => DHAP	reversible
FBA	Aldolase	GAP + DHAP => FBP	reversible
FBPase	Fructose-1,6-bisphosphatase	FBP + H2O => F6P + Pi	irreversible
TRK	Transketolase	F6P + GAP => E4P + X5P	reversible
FBA	Aldolase	E4P + DHAP => SBP	reversible
SBPase	Sedoheptulose-1,7-phosphatase	SBP + H2O => S7P + Pi	irreversible
TRK	Transketolase	S7P + GAP => R5P + X5P	reversible
RPE	Ribulose-5-phosphate epimerase	X5P => Ru5P	reversible
RPI	Ribose-5-phosphate isomerase	R5P => Ru5P	reversible
PRK	Phosphoribulokinase	Ru5P + ATP => RuBP + ADP + H+	irreversible
PGM	Phosphoglucomutase	G1P=>G6P	reversible
PGI	Phosphoglucoisomerase	G6P=>F6P	reversible
AGPase	Glucose-1-phosphate adenylyltransferase	ATP+G1P=>ADPG+PPi	reversible

## Sheet: B_Protein_distributions
Pathway	Conditions	Compartments	component	Method	Average (proportion of total, pyrenoid in bold)	Average (% of total, pyrenoid in bold)	Number of replicates	stdev	SE
Starch	HC	Stroma	AGPase	enzyme_activity	0.980547	98.0547	4	0.132891	0.0664453
	LC	Stroma	AGPase	enzyme_activity	0.981153	98.1153	4	0.113704	0.0568519
	HC	Pyrenoid	AGPase	enzyme_activity	0.0194534	1.94534	4	0.0184154	0.00920769
	LC	Pyrenoid	AGPase	enzyme_activity	0.018847	1.8847	4	0.0086844	0.0043422
CBC	HC	Stroma	FBA	proteomics	0.991219	99.1219	4	0.0116707	0.00583533
	LC	Stroma	FBA	proteomics	0.981376	98.1376	4	0.0118218	0.00591091
	HC	Pyrenoid	FBA	proteomics	0.00878114	0.878114	4	0.0116707	0.00583533
	LC	Pyrenoid	FBA	proteomics	0.0186241	1.86241	4	0.0118218	0.00591091
CBC	HC	Stroma	FBPase	proteomics	0.988065	98.8065	4	0.0238706	0.0119353
	LC	Stroma	FBPase	proteomics	1	100	4	ND	ND
	HC	Pyrenoid	FBPase	proteomics	0.0119353	1.19353	4	0.0238706	0.0119353
	LC	Pyrenoid	FBPase	proteomics	ND	ND	4	ND	ND
CBC	HC	Stroma	GAPDH	proteomics	0.890446	89.0446	4	0.0333059	0.016653
	LC	Stroma	GAPDH	proteomics	0.922073	92.2073	4	0.0201752	0.0100876
	HC	Pyrenoid	GAPDH	proteomics	0.109554	10.9554	4	0.0333059	0.016653
	LC	Pyrenoid	GAPDH	proteomics	0.0779267	7.79267	4	0.0201752	0.0100876
Starch	HC	Stroma	PGI	proteomics	1	100	4	ND	ND
	LC	Stroma	PGI	proteomics	1	100	4	ND	ND
	HC	Pyrenoid	PGI	proteomics	ND	ND	4	ND	ND
	LC	Pyrenoid	PGI	proteomics	ND	ND	4	ND	ND
CBC	HC	Stroma	PGK	proteomics	1	100	4	ND	ND
	LC	Stroma	PGK	proteomics	0.997142	99.7142	4	0.00483237	0.00241619
	HC	Pyrenoid	PGK	proteomics	ND	ND	4	ND	ND
	LC	Pyrenoid	PGK	proteomics	0.00285778	0.285778	4	0.00483237	0.00241619
Starch	HC	Stroma	PGM	enzyme_activity	0.990253	99.0253	4	0.0910693	0.0455347
	LC	Stroma	PGM	enzyme_activity	0.993699	99.3699	4	0.0774494	0.0387247
	HC	Pyrenoid	PGM	enzyme_activity	0.00974745	0.974745	4	0.00183132	0.000915659
	LC	Pyrenoid	PGM	enzyme_activity	0.00630053	0.630053	4	0.00325728	0.00162864
CBC	HC	Stroma	PRK	proteomics	0.874063	87.4063	4	0.0990667	0.0495333
	LC	Stroma	PRK	proteomics	0.987551	98.7551	4	0.017401	0.00870048
	HC	Pyrenoid	PRK	proteomics	0.125937	12.5937	4	0.0990667	0.0495333
	LC	Pyrenoid	PRK	proteomics	0.0124493	1.24493	4	0.017401	0.00870048
CBC	HC	Stroma	RPE	proteomics	1	100	4	ND	ND
	LC	Stroma	RPE	proteomics	0.984743	98.4743	4	0.021104	0.010552
	HC	Pyrenoid	RPE	proteomics	ND	ND	4	ND	ND
	LC	Pyrenoid	RPE	proteomics	0.0152569	1.52569	4	0.021104	0.010552
CBC	HC	Stroma	RPI	proteomics	1	100	4	ND	ND
	LC	Stroma	RPI	proteomics	1	100	4	ND	ND
	HC	Pyrenoid	RPI	proteomics	ND	ND	4	ND	ND
	LC	Pyrenoid	RPI	proteomics	ND	ND	4	ND	ND
CBC	HC	Stroma	Rubisco	enzyme_activity	0.782251	78.2251	4	0.105668	0.0528341
	LC	Stroma	Rubisco	enzyme_activity	0.381606	38.1606	4	0.0458384	0.0229192
	HC	Pyrenoid	Rubisco	enzyme_activity	0.217749	21.7749	4	0.00722764	0.00361382
	LC	Pyrenoid	Rubisco	enzyme_activity	0.618394	61.8394	4	0.0211393	0.0105696
	HC	Stroma	SBPase	proteomics	1	100	4	ND	ND
CBC	LC	Stroma	SBPase	proteomics	1	100	4	ND	ND
	HC	Pyrenoid	SBPase	proteomics	ND	ND	4	ND	ND
	LC	Pyrenoid	SBPase	proteomics	ND	ND	4	ND	ND
	HC	Stroma	TPI	proteomics	1	100	4	ND	ND
CBC	LC	Stroma	TPI	proteomics	0.99092	99.092	4	0.0111405	0.00557027
	HC	Pyrenoid	TPI	proteomics	ND	ND	4	ND	ND
	LC	Pyrenoid	TPI	proteomics	0.00907958	0.907958	4	0.0111405	0.00557027
CBC	HC	Stroma	TRK	proteomics	1	100	4	ND	ND
	LC	Stroma	TRK	proteomics	0.996535	99.6535	4	0.00231627	0.00115814
	HC	Pyrenoid	TRK	proteomics	ND	ND	4	ND	ND
	LC	Pyrenoid	TRK	proteomics	0.00346462	0.346463	4	0.00231627	0.00115814

## Sheet: C_Metabolite_concentrations
Metabolite_abbreviation	Metabolite_full_name	Condition	Replicate	Concentration_µM	Concentration_measured_or_calculated (calculated according to Mettler at al., 2014)	Fraction
RuBP	Ribulose-1,5-bisphosphate	HC	1	1523.92	measured	Stroma+pyrenoid
3PGA	3-phosphoglycerate	HC	1	1921.72	measured	Stroma+pyrenoid
GAP	Glyceraldehyde-3-phosphate	HC	1	22.572	measured	Stroma+pyrenoid
DHAP	Dehydroxyacetone-phosphate	HC	1	496.619	measured	Stroma+pyrenoid
FBP	Fructose-1,6-bisphosphate	HC	1	178.865	measured	Stroma+pyrenoid
F6P	Fructose-6-phosphate	HC	1	479.355	measured	Stroma+pyrenoid
E4P	Erytrose-4-phosphate	HC	1	18.8891	calculated	Stroma+pyrenoid
Xu5P	Xylulose-5-phosphate	HC	1	48.1357	calculated	Stroma+pyrenoid
SBP	Sedoheptulose-bisphosphate	HC	1	300.882	measured	Stroma+pyrenoid
S7P	Sedoheptulose-7-phosphate	HC	1	1458.54	measured	Stroma+pyrenoid
R5P	Ribose-5-phosphate	HC	1	97.1214	measured	Stroma+pyrenoid
Ru5P	Ribulose-5-phosphate	HC	1	32.0904	calculated	Stroma+pyrenoid
Xu5P+Ru5P	Xylulose-5-phosphate_and_Ribulose-5-phosphate	HC	1	80.2261	measured	Stroma+pyrenoid
BPGA	1,3-diphosphoglycerate	HC	1	1.03773	calculated	Stroma+pyrenoid
G1P	Glucose-1-phosphate	HC	1	62.8835	measured	Stroma+pyrenoid
G6P	Glucose-6-phosphate	HC	1	844.807	measured	Stroma+pyrenoid
ADPG	ADP-glucose	HC	1	18.8157	measured	Stroma+pyrenoid
RuBP	Ribulose-1,5-bisphosphate	HC	2	1119.12	measured	Stroma+pyrenoid
3PGA	3-phosphoglycerate	HC	2	1584.97	measured	Stroma+pyrenoid
GAP	Glyceraldehyde-3-phosphate	HC	2	21.91	measured	Stroma+pyrenoid
DHAP	Dehydroxyacetone-phosphate	HC	2	441.699	measured	Stroma+pyrenoid
FBP	Fructose-1,6-bisphosphate	HC	2	170.499	measured	Stroma+pyrenoid
F6P	Fructose-6-phosphate	HC	2	374.858	measured	Stroma+pyrenoid
E4P	Erytrose-4-phosphate	HC	2	20.5969	calculated	Stroma+pyrenoid
Xu5P	Xylulose-5-phosphate	HC	2	33.5089	calculated	Stroma+pyrenoid
SBP	Sedoheptulose-bisphosphate	HC	2	170.011	measured	Stroma+pyrenoid
S7P	Sedoheptulose-7-phosphate	HC	2	1132.64	measured	Stroma+pyrenoid
R5P	Ribose-5-phosphate	HC	2	62.594	measured	Stroma+pyrenoid
Ru5P	Ribulose-5-phosphate	HC	2	22.3393	calculated	Stroma+pyrenoid
Xu5P+Ru5P	Xylulose-5-phosphate_and_Ribulose-5-phosphate	HC	2	55.8481	measured	Stroma+pyrenoid
BPGA	1,3-diphosphoglycerate	HC	2	0.855886	calculated	Stroma+pyrenoid
G1P	Glucose-1-phosphate	HC	2	44.8389	measured	Stroma+pyrenoid
G6P	Glucose-6-phosphate	HC	2	688.506	measured	Stroma+pyrenoid
ADPG	ADP-glucose	HC	2	14.5819	measured	Stroma+pyrenoid
RuBP	Ribulose-1,5-bisphosphate	HC	3	1086.07	measured	Stroma+pyrenoid
3PGA	3-phosphoglycerate	HC	3	1546.44	measured	Stroma+pyrenoid
GAP	Glyceraldehyde-3-phosphate	HC	3	20.3772	measured	Stroma+pyrenoid
DHAP	Dehydroxyacetone-phosphate	HC	3	449.268	measured	Stroma+pyrenoid
FBP	Fructose-1,6-bisphosphate	HC	3	164.703	measured	Stroma+pyrenoid
F6P	Fructose-6-phosphate	HC	3	355.591	measured	Stroma+pyrenoid
E4P	Erytrose-4-phosphate	HC	3	19.1758	calculated	Stroma+pyrenoid
Xu5P	Xylulose-5-phosphate	HC	3	31.7538	calculated	Stroma+pyrenoid
SBP	Sedoheptulose-bisphosphate	HC	3	228.494	measured	Stroma+pyrenoid
S7P	Sedoheptulose-7-phosphate	HC	3	1070.53	measured	Stroma+pyrenoid
R5P	Ribose-5-phosphate	HC	3	69.6937	measured	Stroma+pyrenoid
Ru5P	Ribulose-5-phosphate	HC	3	21.1692	calculated	Stroma+pyrenoid
Xu5P+Ru5P	Xylulose-5-phosphate_and_Ribulose-5-phosphate	HC	3	52.923	measured	Stroma+pyrenoid
BPGA	1,3-diphosphoglycerate	HC	3	0.835075	calculated	Stroma+pyrenoid
G1P	Glucose-1-phosphate	HC	3	40.7453	measured	Stroma+pyrenoid
G6P	Glucose-6-phosphate	HC	3	619.899	measured	Stroma+pyrenoid
ADPG	ADP-glucose	HC	3	10.9416	measured	Stroma+pyrenoid
RuBP	Ribulose-1,5-bisphosphate	HC	4	1278.25	measured	Stroma+pyrenoid
3PGA	3-phosphoglycerate	HC	4	1698.89	measured	Stroma+pyrenoid
GAP	Glyceraldehyde-3-phosphate	HC	4	22.9002	measured	Stroma+pyrenoid
DHAP	Dehydroxyacetone-phosphate	HC	4	506.778	measured	Stroma+pyrenoid
FBP	Fructose-1,6-bisphosphate	HC	4	242.547	measured	Stroma+pyrenoid
F6P	Fructose-6-phosphate	HC	4	380.94	measured	Stroma+pyrenoid
E4P	Erytrose-4-phosphate	HC	4	24.1749	calculated	Stroma+pyrenoid
Xu5P	Xylulose-5-phosphate	HC	4	30.3238	calculated	Stroma+pyrenoid
SBP	Sedoheptulose-bisphosphate	HC	4	247.553	measured	Stroma+pyrenoid
S7P	Sedoheptulose-7-phosphate	HC	4	1082.06	measured	Stroma+pyrenoid
R5P	Ribose-5-phosphate	HC	4	58.2415	measured	Stroma+pyrenoid
Ru5P	Ribulose-5-phosphate	HC	4	20.2159	calculated	Stroma+pyrenoid
Xu5P+Ru5P	Xylulose-5-phosphate_and_Ribulose-5-phosphate	HC	4	50.5397	measured	Stroma+pyrenoid
BPGA	1,3-diphosphoglycerate	HC	4	0.917403	calculated	Stroma+pyrenoid
G1P	Glucose-1-phosphate	HC	4	48.0387	measured	Stroma+pyrenoid
G6P	Glucose-6-phosphate	HC	4	632.764	measured	Stroma+pyrenoid
ADPG	ADP-glucose	HC	4	10.5645	measured	Stroma+pyrenoid
RuBP	Ribulose-1,5-bisphosphate	LC*	1	2016.77	measured	Stroma+pyrenoid
3PGA	3-phosphoglycerate	LC*	1	1031.57	measured	Stroma+pyrenoid
GAP	Glyceraldehyde-3-phosphate	LC*	1	41.7601	measured	Stroma+pyrenoid
DHAP	Dehydroxyacetone-phosphate	LC*	1	402.601	measured	Stroma+pyrenoid
FBP	Fructose-1,6-bisphosphate	LC*	1	122.385	measured	Stroma+pyrenoid
F6P	Fructose-6-phosphate	LC*	1	508.139	measured	Stroma+pyrenoid
E4P	Erytrose-4-phosphate	LC*	1	32.4689	calculated	Stroma+pyrenoid
Xu5P	Xylulose-5-phosphate	LC*	1	54.92	calculated	Stroma+pyrenoid
SBP	Sedoheptulose-bisphosphate	LC*	1	218.505	measured	Stroma+pyrenoid
S7P	Sedoheptulose-7-phosphate	LC*	1	1548.94	measured	Stroma+pyrenoid
R5P	Ribose-5-phosphate	LC*	1	88.9099	measured	Stroma+pyrenoid
Ru5P	Ribulose-5-phosphate	LC*	1	36.6133	calculated	Stroma+pyrenoid
Xu5P+Ru5P	Xylulose-5-phosphate_and_Ribulose-5-phosphate	LC*	1	91.5333	measured	Stroma+pyrenoid
BPGA	1,3-diphosphoglycerate	LC*	1	0.557047	calculated	Stroma+pyrenoid
G1P	Glucose-1-phosphate	LC*	1	73.0986	measured	Stroma+pyrenoid
G6P	Glucose-6-phosphate	LC*	1	791.467	measured	Stroma+pyrenoid
ADPG	ADP-glucose	LC*	1	50.5812	measured	Stroma+pyrenoid
RuBP	Ribulose-1,5-bisphosphate	LC*	2	2042.69	measured	Stroma+pyrenoid
3PGA	3-phosphoglycerate	LC*	2	1163.97	measured	Stroma+pyrenoid
GAP	Glyceraldehyde-3-phosphate	LC*	2	66.4291	measured	Stroma+pyrenoid
DHAP	Dehydroxyacetone-phosphate	LC*	2	429.51	measured	Stroma+pyrenoid
FBP	Fructose-1,6-bisphosphate	LC*	2	120.188	measured	Stroma+pyrenoid
F6P	Fructose-6-phosphate	LC*	2	491.714	measured	Stroma+pyrenoid
E4P	Erytrose-4-phosphate	LC*	2	54.7164	calculated	Stroma+pyrenoid
Xu5P	Xylulose-5-phosphate	LC*	2	50.1657	calculated	Stroma+pyrenoid
SBP	Sedoheptulose-bisphosphate	LC*	2	194.019	measured	Stroma+pyrenoid
S7P	Sedoheptulose-7-phosphate	LC*	2	1516.4	measured	Stroma+pyrenoid
R5P	Ribose-5-phosphate	LC*	2	118.635	measured	Stroma+pyrenoid
Ru5P	Ribulose-5-phosphate	LC*	2	33.4438	calculated	Stroma+pyrenoid
Xu5P+Ru5P	Xylulose-5-phosphate_and_Ribulose-5-phosphate	LC*	2	83.6094	measured	Stroma+pyrenoid
BPGA	1,3-diphosphoglycerate	LC*	2	0.628544	calculated	Stroma+pyrenoid
G1P	Glucose-1-phosphate	LC*	2	80.0599	measured	Stroma+pyrenoid
G6P	Glucose-6-phosphate	LC*	2	814.975	measured	Stroma+pyrenoid
ADPG	ADP-glucose	LC*	2	54.0442	measured	Stroma+pyrenoid
RuBP	Ribulose-1,5-bisphosphate	LC*	3	1774.01	measured	Stroma+pyrenoid
3PGA	3-phosphoglycerate	LC*	3	1073	measured	Stroma+pyrenoid
GAP	Glyceraldehyde-3-phosphate	LC*	3	52.4319	measured	Stroma+pyrenoid
DHAP	Dehydroxyacetone-phosphate	LC*	3	380.372	measured	Stroma+pyrenoid
FBP	Fructose-1,6-bisphosphate	LC*	3	63.9586	measured	Stroma+pyrenoid
F6P	Fructose-6-phosphate	LC*	3	414.508	measured	Stroma+pyrenoid
E4P	Erytrose-4-phosphate	LC*	3	40.142	calculated	Stroma+pyrenoid
Xu5P	Xylulose-5-phosphate	LC*	3	45.497	calculated	Stroma+pyrenoid
SBP	Sedoheptulose-bisphosphate	LC*	3	196.367	measured	Stroma+pyrenoid
S7P	Sedoheptulose-7-phosphate	LC*	3	1298.55	measured	Stroma+pyrenoid
R5P	Ribose-5-phosphate	LC*	3	95.3464	measured	Stroma+pyrenoid
Ru5P	Ribulose-5-phosphate	LC*	3	30.3313	calculated	Stroma+pyrenoid
Xu5P+Ru5P	Xylulose-5-phosphate_and_Ribulose-5-phosphate	LC*	3	75.8283	measured	Stroma+pyrenoid
BPGA	1,3-diphosphoglycerate	LC*	3	0.579421	calculated	Stroma+pyrenoid
G1P	Glucose-1-phosphate	LC*	3	65.1574	measured	Stroma+pyrenoid
G6P	Glucose-6-phosphate	LC*	3	736.242	measured	Stroma+pyrenoid
ADPG	ADP-glucose	LC*	3	48.8038	measured	Stroma+pyrenoid
RuBP	Ribulose-1,5-bisphosphate	LC*	4	1818.92	measured	Stroma+pyrenoid
3PGA	3-phosphoglycerate	LC*	4	1091.76	measured	Stroma+pyrenoid
GAP	Glyceraldehyde-3-phosphate	LC*	4	74.278	measured	Stroma+pyrenoid
DHAP	Dehydroxyacetone-phosphate	LC*	4	405.548	measured	Stroma+pyrenoid
FBP	Fructose-1,6-bisphosphate	LC*	4	57.1993	measured	Stroma+pyrenoid
F6P	Fructose-6-phosphate	LC*	4	452.827	measured	Stroma+pyrenoid
E4P	Erytrose-4-phosphate	LC*	4	65.5711	calculated	Stroma+pyrenoid
Xu5P	Xylulose-5-phosphate	LC*	4	43.1055	calculated	Stroma+pyrenoid
SBP	Sedoheptulose-bisphosphate	LC*	4	143.344	measured	Stroma+pyrenoid
S7P	Sedoheptulose-7-phosphate	LC*	4	1347.48	measured	Stroma+pyrenoid
R5P	Ribose-5-phosphate	LC*	4	97.9237	measured	Stroma+pyrenoid
Ru5P	Ribulose-5-phosphate	LC*	4	28.737	calculated	Stroma+pyrenoid
Xu5P+Ru5P	Xylulose-5-phosphate_and_Ribulose-5-phosphate	LC*	4	71.8425	measured	Stroma+pyrenoid
BPGA	1,3-diphosphoglycerate	LC*	4	0.589552	calculated	Stroma+pyrenoid
G1P	Glucose-1-phosphate	LC*	4	72.5006	measured	Stroma+pyrenoid
G6P	Glucose-6-phosphate	LC*	4	700.053	measured	Stroma+pyrenoid
ADPG	ADP-glucose	LC*	4	39.1218	measured	Stroma+pyrenoid

## Sheet: D_Chloroplast_volume
Exemplary calculation of Calvin-Benson cycle intermediate levels in chloroplast based on measured metabolites amounts per cell and literature values of subcellular distribution. a Distribution based on data obtained by non-aqueous fractionation of spinach leaves (Gerhardt et al. 1987). b Distribution assumed to be solely plastidial (Arnold and Nikoloski 2011). c The percentage of stromal volume c…
Metabolite	Measured concentration per cell [µM]	% metabolite	Calculated concentration in chloroplast [µM]c
RuBP	329.72	100a	1057.46
3PGA	2343.55	70a	5261.35
GAP	9.24	46.67a	13.83
DHAP	340.38	46.67a	509.44
FBP	106.06	90a	306.13
F6P	386.78	40.22a	498.89
SBP	184.28	100b	591.02
S7P	452.29	100b	1450.59
R5P	23.73	100b	76.11
X5P+Ru5P	22.71	100b	72.83

## Sheet: E_Photosynthesis_rates
	HC	LC*
light intensity [µmol photons/m2/s]	49	52.3
µmol O2/h/mg Chl	54.5712	56.8372
mg Chl/ml	24.6833	21.5
µmol O2/h/ml	1.347	1.222
nL cell volume/ml	969.433	827.533
µmol O2/h/nL	0.00138947	0.00147668
µmol O2/s/nL	3.85964e-07	4.10188e-07
µmol O2/s/L	385.964	410.188
Palt electrons used in other reactions [%]	0	0
Vc+Vo [µmol CO2/s/L]	385.964	410.188
Vo [µmol CO2/s/L]	0	0
Vc [µmol CO2/s/L]	385.964	410.188

## Sheet: F_Pyrenoid_volume
	Number of pyrenoids analysed	Average volume [µm3]	Standard deviation volume [µm3]	Standard error volume [µm3]
Cell grown under high CO2	12	1.32851	0.901646	0.0751371
Cell grown under low CO2	10	1.05969	0.545332	0.0545332

## Sheet: G_ATP_NADPH
	HC	LC*
light intensity [µmol photons/m2/s]	49	52.3
µmol O2/h/mg Chl	54.5712	56.8372
mg Chl/ml	24.6833	21.5
µmol O2/h/ml	1.347	1.222
nL cell volume/ml	969.433	827.533
µmol O2/h/nL	0.00138947	0.00147668
µmol O2/s/nL	3.85964e-07	4.10188e-07
µmol O2/s/L	385.964	410.188
µmol NADPH/s/L	771.929	820.376
µmol ATP/s/L (total; with cyclic electron transport assumed to reach 1.5 ATP per NADPH)	1157.89	1230.56
