# Supplementary material for: Effects of microcompartmentation on flux distribution and metabolic pools in Chlamydomonas reinhardtii chloroplasts
Source: eLife journal article supplement (doi:10.7554/elife.37960), 2018-10-11
Supplement: supp [file elife-37960-supp-v1.zip › elife_poa_e37960_Supplementary_File_2.xlsx]

## Sheet: Sheet1
Phytozome JGI v5.5 (Augustus u111.6) ID	Phytozome JGI v5.3.1 (Augustus u11.6) ID	Augustusv10.2ID	Sequencing notes (S=start, E=end, numbers are residue numbers starting from ATG)	Chlamy Plate Coordinate (Localization data)	Gene length	Common Name	Synonyms vLookup	defline	description	Best Arabidopsis hit tair10 defline
Cre03.g187450	Cre03.g187450	Cre03.g187450	S-E,	T3A06	807	RPI1	g3883.t1,Cre03.g187450.t1.1,RPI1	Ribose-5-phosphate isomerase	Ribose-5-phosphate isomerase (EC 5.3.1.6), pentose phosphate isomerase; likely plastid precursor based on putative organelle-targeting N-terminal sequence and similarity to spinach plastid ribose phosphate isomerase (GenBank AAL77589)	Ribose 5-phosphate isomerase, type A protein
Cre05.g234550	Cre05.g234550	Cre05.g234550	S-992, 1138-E,	T3D01	1958	FBA3	g5352.t2, g5352.t1,Cre05.g234550.t1.1	Fructose-1,6-bisphosphate aldolase	Fructose-1,6-bisphosphate aldolase 1 (EC:4.1.2.13); probably plastidic, but predicted mitochondrial by Target-P; 87% identical to cDNA (Q42690); glycolytic enzyme that catalyses the reversible aldol cleavage or condensation of fructose-1,6-bisphosphate in	fructose-bisphosphate aldolase 2
Cre01.g010900	g274	Cre01.g010900	S-968, 1142-E,	T3D03	1980	GAP3	g274.t1,Cre01.g010900.t1.1	Glyceraldehyde-3-Phosphate Dehydrogenase	Glyceraldehyde 3-phosphate dehydrogenase A, chloroplast precursor (NADP-dependent glyceraldehyde phosphate dehydrogenase subunit A); corresponds to G3PA_CHLRE; found in the flagellar proteome [PMID: 15998802]. This enzyme is bispecific for NADP and NAD,	glyceraldehyde-3-phosphate dehydrogenase B subunit
Cre12.g511900	Cre12.g511900	Cre12.g511900	S-888, 1226-E,	T3D04	2030	RPE1	g12310.t1,Cre12.g511900.t1.1,RPE1	Ribulose phosphate-3-epimerase, chloroplast precursor	Ribulose phosphate-3-epimerase, chloroplast precursor; (EC 2.7.1.19)	D-ribulose-5-phosphate-3-epimerase
Cre03.g185550	Cre03.g185550	Cre03.g185550	S-896, 1301-E,	T3D06	2157	SBP1	g3845.t1,Cre03.g185550.t1.1,SBP1	Sedoheptulose-1,7-bisphosphatase	Sedoheptulose-1,7-bisphosphatase (EC 3.1.3.37), chloroplast precursor; 98% identical to Chlamydomonas SBPase cDNA sequence S17P [GenBank CAA52439, PMID: 8165256], but is less consistent with the Chlamydomonas SBPase AA sequence deduced from the genomic se	sedoheptulose-bisphosphatase
Cre12.g485150	Cre12.g485150	Cre12.g485150	S-894, 2054-E,	T3D08	2390	GAP1 (GAPDH)	g12039.t1,Cre12.g485150.t1.1	Glyceraldehyde 3-phosphate dehydrogenase	Glyceraldehyde 3-phosphate dehydrogenase (EC 1.2.1.12), possible cytosolic form; carboxy 90% of deduced AA sequence identical to cytosolic G3PC_CHLRE [Genbank P49644; PMID: 8114942], but the N-terminal AA\'s do not match those of G3PC_CHLRE. Two splice va	glyceraldehyde-3-phosphate dehydrogenase of plastid 1
Cre12.g554800	Cre12.g554800	Cre12.g554800	S-901, 1925-E	T3D12	2604	PRK1	g13438.t1,Cre12.g554800.t1.1	Phosphoribulokinase	Phosphoribulokinase, chloroplast precursor. Mapped in C. reinhardtii as the AC214 locus on linkage group XII/XIII. Calvin cycle enzyme. Activity regulated by light by way of chloroplastic thioredoxins and by formation of a complex with GAPDH and CP12 [PMI	phosphoribulokinase
Cre02.g093450	Cre02.g093450	Cre02.g093450	S-943, 2191-E,	T3E05	3026	FBA2	g1764.t1,Cre02.g093450.t1.1	Fructose-1,6-bisphosphate aldolase	Fructose-1,6-bisphosphate aldolase [EC 4.1.2.13]; glycolytic enzyme that catalyses the reversible aldol cleavage or condensation of fructose-1,6-bisphosphate into dihydroxyacetone-phosphate and glyceraldehyde 3-phosphate. Originally annotated as ALD2.	Aldolase superfamily protein
Cre11.g467770	g11700	Cre22.g763250	S-927, 2447-E,	T3E06	3198	PGK1	g11700.t1,Cre22.g763250.t1.1,Cre22.g763250.t1.2,PGK1	Phosphoglycerate kinase, chloroplast precursor	Phosphoglycerate kinase, chloroplast precursor [EC:2.7.2.3]; catalyses the conversion of 1,3-diphosphoglycerate to 3-phosphoglycerate (the second step of the second phase in glycolysis) forming one molecule of ATP; catalyses also the reverse reaction [PMI	Phosphoglycerate kinase family protein
Cre02.g120100	Cre02.g120100	Cre02.g120100	S-E	T1D08	1125	RBCS1	g2494.t1,Cre02.g120100.t1.1	Ribulose-1,5-bisphosphate carboxylase/oxygenase small subunit 1, chloroplast precursor	Ribulose bisphosphate carboxylase/oxygenase small subunit 1 [PMID: 3820291; PMID: 521455; PMID: 11641402]	ribulose bisphosphate carboxylase small chain 1A
Cre02.g120150	Cre02.g120150	Cre02.g120150	S-E	T2D06	1267	RBCS2	g2495.t1,Cre02.g120150.t1.1	Ribulose-1,5-bisphosphate carboxylase/oxygenase small subunit 2, chloroplast precursor	RuBisCO small subunit 2, chloroplast precursor [PMID: 3820291]	ribulose bisphosphate carboxylase small chain 1A
