# Supplementary material for: Effects of microcompartmentation on flux distribution and metabolic pools in Chlamydomonas reinhardtii chloroplasts
Source: eLife journal article supplement (doi:10.7554/elife.37960), 2018-10-11
Supplement: supp [file elife-37960-supp-v1.zip › elife_poa_e37960_Supplementary_File_3.xlsx]

## Sheet: A_reactions
Reactions	Reversibility		Enzyme name	EC number
Diffusion CO2 c-s	Reversible	<=>CO2_s	n/a
Diffusion CO2 s-y	Reversible	CO2_s<=>CO2_y	n/a
Rubisco carboxylase s	Irreversible	CO2_s+RuBP_s=>3PGA_s	Ribulose-1,5-bisphosphat-carboxylase/-oxygenase	4.1.1.39
Phosphoglycerate kinase s	Reversible	3PGA_s+ATP_s<=>BPGA_s+ADP_s	Phosphoglycerate kinase	2.7.2.3
Glyceraldehyde-3-phosphate dehydrogenase s	Reversible	BPGA_s+NADPH_s<=>GAP_s+NADP_s	Glyceraldehyde-3-phosphate dehydrogenase	1.2.1.13
Triosephosphate isomerase s	Reversible	GAP_s<=>DHAP_s	Triosephosphate isomerase	5.3.1.1
Aldolase FBP s	Reversible	GAP_s+DHAP_s<=>FBP_s	Aldolase	4.1.2.13
Fructose-1,6-bisphosphatase s	Irreversible	FBP_s=>F6P_s	Fructose-1,6-bisphosphatase	3.1.3.11
Transketolase F6P s	Reversible	GAP_s+F6P_s<=>E4P_s+Xu5P_s	Transketolase	2.2.1.1
Aldolase SBP s	Reversible	DHAP_s+E4P_s<=>SBP_s	Aldolase	4.1.2.13
Sedoheptulose-1,7-phosphatase s	Irreversible	SBP_s=>S7P_s	Sedoheptulose-1,7-phosphatase	3.1.3.37
Transketolase S7P s	Reversible	GAP_s+S7P_s<=>Xu5P_s+R5P_s	Transketolase	2.2.1.1
Ribulose-5-phosphate epimerase s	Reversible	Xu5P_s<=>Ru5P_s	Ribulose-5-phosphate epimerase	5.1.3.1
Ribose-5-phosphate isomerase s	Reversible	R5P_s<=>Ru5P_s	Ribose-5-phosphate isomerase	5.3.1.6
Phosphoribulokinase s	Irreversible	ATP_s+Ru5P_s=>RuBP_s+ADP_s	Phosphoribulokinase	2.7.1.19
Phosphoglucoisomerase s	Reversible	F6P_s<=>G6P_s	Phosphoglucomutase	5.4.2.2
Phosphoglucomutase s	Reversible	G6P_s<=>G1P_s	Phosphoglucoisomerase	5.3.1.9
Glucose-1-phosphate adenylyltransferase s	Reversible	ATP_s+G1P_s<=>ADP_s+ADPG_s	Glucose-1-phosphate adenylyltransferase	2.7.7.27
ADPGstore s	Reversible	ADPG_s<=>	n/a
Rubisco carboxylase y	Irreversible	CO2_y+RuBP_y=>3PGA_y	Ribulose-1,5-bisphosphat-carboxylase/-oxygenase	4.1.1.39
Phosphoglycerate kinase y	Reversible	3PGA_y+ATP_y<=>BPGA_y+ADP_y	Phosphoglycerate kinase	2.7.2.3
Glyceraldehyde-3-phosphate dehydrogenase y	Reversible	BPGA_y+NADPH_y<=>GAP_y+NADP_y	Glyceraldehyde-3-phosphate dehydrogenase	1.2.1.13
Triosephosphate isomerase y	Reversible	GAP_y<=>DHAP_y	Triosephosphate isomerase	5.3.1.1
Aldolase FBP y	Reversible	GAP_y+DHAP_y<=>FBP_y	Aldolase	4.1.2.13
Fructose-1,6-bisphosphatase y	Irreversible	FBP_y=>F6P_y	Fructose-1,6-bisphosphatase	3.1.3.11
Transketolase F6P y	Reversible	GAP_y+F6P_y<=>E4P_y+Xu5P_y	Transketolase	2.2.1.1
Aldolase SBP y	Reversible	DHAP_y+E4P_y<=>SBP_y	Aldolase	4.1.2.13
Sedoheptulose-1,7-phosphatase y	Irreversible	SBP_y=>S7P_y	Sedoheptulose-1,7-phosphatase	3.1.3.37
Transketolase S7P y	Reversible	GAP_y+S7P_y<=>Xu5P_y+R5P_y	Transketolase	2.2.1.1
Ribulose-5-phosphate epimerase y	Reversible	Xu5P_y<=>Ru5P_y	Ribulose-5-phosphate epimerase	5.1.3.1
Ribose-5-phosphate isomerase y	Reversible	R5P_y<=>Ru5P_y	Ribose-5-phosphate isomerase	5.3.1.6
Phosphoribulokinase y	Irreversible	ATP_y+Ru5P_y=>RuBP_y+ADP_y	Phosphoribulokinase	2.7.1.19
Phosphoglucoisomerase y	Reversible	F6P_y<=>G6P_y	Phosphoglucomutase	5.4.2.2
Phosphoglucomutase y	Reversible	G6P_y<=>G1P_y	Phosphoglucoisomerase	5.3.1.9
Glucose-1-phosphate adenylyltransferase y	Reversible	ATP_y+G1P_y<=>ADP_y+ADPG_y	Glucose-1-phosphate adenylyltransferase	2.7.7.27
ADPGstore y	Reversible	ADPG_y<=>	n/a
Diffusion RuBP	Reversible	RuBP_s<=>RuBP_y	n/a
Diffusion 3PGA	Reversible	3PGA_s<=>3PGA_y	n/a
Diffusion GAP	Reversible	GAP_s<=>GAP_y	n/a
Diffusion DHAP	Reversible	DHAP_s<=>DHAP_y	n/a
Diffusion FBP	Reversible	FBP_s<=>FBP_y	n/a
Diffusion F6P	Reversible	F6P_s<=>F6P_y	n/a
Diffusion E4P	Reversible	E4P_s<=>E4P_y	n/a
Diffusion Xu5P	Reversible	Xu5P_s<=>Xu5P_y	n/a
Diffusion SBP	Reversible	SBP_s<=>SBP_y	n/a
Diffusion S7P	Reversible	S7P_s<=>S7P_y	n/a
Diffusion R5P	Reversible	R5P_s<=>R5P_y	n/a
Diffusion Ru5P	Reversible	Ru5P_s<=>Ru5P_y	n/a
Diffusion BPGA	Reversible	BPGA_s<=>BPGA_y	n/a
Diffusion G1P	Reversible	G1P_s<=>G1P_y	n/a
Diffusion G6P	Reversible	G6P_s<=>G6P_y	n/a
Diffusion ADPG	Reversible	ADPG_s<=>ADPG_y	n/a
FNR	Irreversible	NADP_s=>NADPH_s	n/a
ATPase	Irreversible	ADP_s=>ATP_s	H+-transporting ATPase	3.6.3.14
Diffusion ADP	Reversible	ADP_s<=>ADP_y	Ferredoxin-NADP+ reductase	1.18.1.2
Diffusion ATP	Reversible	ATP_s<=>ATP_y	n/a
Diffusion NADP	Reversible	NADP_s<=>NADP_y	n/a
Diffusion NADPH	Reversible	NADPH_s<=>NADPH_y	n/a
Diffusion DHAP s-c	Reversible	DHAP_s<=>	n/a
Diffusion BPGA s-c	Reversible	BPGA_s<=>	n/a
Diffusion GAP s-c	Reversible	GAP_s<=>	n/a
Diffusion 3PGA s-c	Reversible	3PGA_s<=>	n/a

## Sheet: B_reactions splitted
Model reaction name	Reversibility
Diffusion CO2 c-s	Irreversible	=>CO2 [s]
Diffusion CO2 c-s_rev	Irreversible	CO2 [s]=>
Diffusion CO2 s-y	Irreversible	CO2 [s]=>CO2 [y]
Diffusion CO2 s-y_rev	Irreversible	CO2 [y]=>CO2 [s]
Rubisco carboxylase 1 s	Irreversible	CO2 [s]+RuBP [s]+Rubisco [s]=>Rubisco_RuBP_C_complex [s]
Rubisco carboxylase 1 s_rev	Irreversible	Rubisco_RuBP_C_complex [s]=>CO2 [s]+RuBP [s]+Rubisco [s]
Rubisco carboxylase 2 s	Irreversible	Rubisco_RuBP_C_complex [s]=>Rubisco [s]+3PGA [s]
Phosphoglycerate kinase 1 s	Irreversible	3PGA [s]+ATP [s]+PGK [s]=>PGK_3PGA_complex [s]
Phosphoglycerate kinase 1 s_rev	Irreversible	PGK_3PGA_complex [s]=>3PGA [s]+ATP [s]+PGK [s]
Phosphoglycerate kinase 2 s	Irreversible	PGK_3PGA_complex [s]=>PGK [s]+BPGA [s]+ADP [s]
Phosphoglycerate kinase 3 s	Irreversible	PGK [s]+BPGA [s]+ADP [s]=>PGK_BPGA_complex [s]
Phosphoglycerate kinase 3 s_rev	Irreversible	PGK_BPGA_complex [s]=>PGK [s]+BPGA [s]+ADP [s]
Phosphoglycerate kinase 4 s	Irreversible	PGK_BPGA_complex [s]=>3PGA [s]+ATP [s]+PGK [s]
Glyceraldehyde-3-phosphate dehydrogenase 1 s	Irreversible	BPGA [s]+NADPH [s]+GAPDH [s]=>GAPDH_BPGA_complex [s]
Glyceraldehyde-3-phosphate dehydrogenase 1 s_rev	Irreversible	GAPDH_BPGA_complex [s]=>BPGA [s]+NADPH [s]+GAPDH [s]
Glyceraldehyde-3-phosphate dehydrogenase 2 s	Irreversible	GAPDH_BPGA_complex [s]=>GAPDH [s]+GAP [s]+NADP [s]
Glyceraldehyde-3-phosphate dehydrogenase 3 s	Irreversible	GAPDH [s]+GAP [s]+NADP [s]=>GAPDH_GAP_complex [s]
Glyceraldehyde-3-phosphate dehydrogenase 3 s_rev	Irreversible	GAPDH_GAP_complex [s]=>GAPDH [s]+GAP [s]+NADP [s]
Glyceraldehyde-3-phosphate dehydrogenase 4 s	Irreversible	GAPDH_GAP_complex [s]=>BPGA [s]+NADPH [s]+GAPDH [s]
Triosephosphate isomerase 1 s	Irreversible	GAP [s]+TPI [s]=>TPI_GAP_complex [s]
Triosephosphate isomerase 1 s_rev	Irreversible	TPI_GAP_complex [s]=>GAP [s]+TPI [s]
Triosephosphate isomerase 2 s	Irreversible	TPI_GAP_complex [s]=>TPI [s]+DHAP [s]
Triosephosphate isomerase 3 s	Irreversible	TPI [s]+DHAP [s]=>TPI_DHAP_complex [s]
Triosephosphate isomerase 3 s_rev	Irreversible	TPI_DHAP_complex [s]=>TPI [s]+DHAP [s]
Triosephosphate isomerase 4 s	Irreversible	TPI_DHAP_complex [s]=>GAP [s]+TPI [s]
Aldolase 1a s	Irreversible	GAP [s]+DHAP [s]+FBA [s]=>FBA_GAP_DHAP_complex [s]
Aldolase 1a s_rev	Irreversible	FBA_GAP_DHAP_complex [s]=>GAP [s]+DHAP [s]+FBA [s]
Aldolase 2a s	Irreversible	FBA_GAP_DHAP_complex [s]=>FBA [s]+FBP [s]
Aldolase 3a s	Irreversible	FBA [s]+FBP [s]=>FBA_FBP_complex [s]
Aldolase 3a s_rev	Irreversible	FBA_FBP_complex [s]=>FBA [s]+FBP [s]
Aldolase 4a s	Irreversible	FBA_FBP_complex [s]=>GAP [s]+DHAP [s]+FBA [s]
Fructose-1,6-bisphosphatase 1 s	Irreversible	FBP [s]+FBPase [s]=>FBPase_FBP_complex [s]
Fructose-1,6-bisphosphatase 1 s_rev	Irreversible	FBPase_FBP_complex [s]=>FBP [s]+FBPase [s]
Fructose-1,6-bisphosphatase 2 s	Irreversible	FBPase_FBP_complex [s]=>FBPase [s]+F6P [s]
Transketolase 1a s	Irreversible	GAP [s]+F6P [s]+TRK [s]=>TRK_F6P_GAP_complex [s]
Transketolase 1a s_rev	Irreversible	TRK_F6P_GAP_complex [s]=>GAP [s]+F6P [s]+TRK [s]
Transketolase 2a s	Irreversible	TRK_F6P_GAP_complex [s]=>TRK [s]+E4P [s]+Xu5P [s]
Transketolase 3a s	Irreversible	TRK [s]+E4P [s]+Xu5P [s]=>TRK_E4P_Xu5P_complex [s]
Transketolase 3a s_rev	Irreversible	TRK_E4P_Xu5P_complex [s]=>TRK [s]+E4P [s]+Xu5P [s]
Transketolase 4a s	Irreversible	TRK_E4P_Xu5P_complex [s]=>GAP [s]+F6P [s]+TRK [s]
Aldolase 1b s	Irreversible	DHAP [s]+E4P [s]+SBA [s]=>SBA_DHAP_E4P_complex [s]
Aldolase 1b s_rev	Irreversible	SBA_DHAP_E4P_complex [s]=>DHAP [s]+E4P [s]+SBA [s]
Aldolase 2b s	Irreversible	SBA_DHAP_E4P_complex [s]=>SBA [s]+SBP [s]
Aldolase 3b s	Irreversible	SBA [s]+SBP [s]=>SBA_SBP_complex [s]
Aldolase 3b s_rev	Irreversible	SBA_SBP_complex [s]=>SBA [s]+SBP [s]
Aldolase 4b s	Irreversible	SBA_SBP_complex [s]=>DHAP [s]+E4P [s]+SBA [s]
Sedoheptulose-1,7-phosphatase 1 s	Irreversible	SBP [s]+SBPase [s]=>SBPase_SBP_complex [s]
Sedoheptulose-1,7-phosphatase 1 s_rev	Irreversible	SBPase_SBP_complex [s]=>SBP [s]+SBPase [s]
Sedoheptulose-1,7-phosphatase 2 s	Irreversible	SBPase_SBP_complex [s]=>SBPase [s]+S7P [s]
Transketolase 1b s	Irreversible	GAP [s]+TRK [s]+S7P [s]=>TRK_S7P_GAP_complex [s]
Transketolase 1b s_rev	Irreversible	TRK_S7P_GAP_complex [s]=>GAP [s]+TRK [s]+S7P [s]
Transketolase 2b s	Irreversible	TRK_S7P_GAP_complex [s]=>TRK [s]+Xu5P [s]+R5P [s]
Transketolase 3b s	Irreversible	TRK [s]+Xu5P [s]+R5P [s]=>TRK_R5P_Xu5P_complex [s]
Transketolase 3b s_rev	Irreversible	TRK_R5P_Xu5P_complex [s]=>TRK [s]+Xu5P [s]+R5P [s]
Transketolase 4b s	Irreversible	TRK_R5P_Xu5P_complex [s]=>GAP [s]+TRK [s]+S7P [s]
Ribulose-5-phosphate epimerase 1 s	Irreversible	Xu5P [s]+RPE [s]=>RPE_Xu5P_complex [s]
Ribulose-5-phosphate epimerase 1 s_rev	Irreversible	RPE_Xu5P_complex [s]=>Xu5P [s]+RPE [s]
Ribulose-5-phosphate epimerase 2 s	Irreversible	RPE_Xu5P_complex [s]=>RPE [s]+Ru5P [s]
Ribulose-5-phosphate epimerase 3 s	Irreversible	RPE [s]+Ru5P [s]=>RPE_Ru5P_complex [s]
Ribulose-5-phosphate epimerase 3 s_rev	Irreversible	RPE_Ru5P_complex [s]=>RPE [s]+Ru5P [s]
Ribulose-5-phosphate epimerase 4 s	Irreversible	RPE_Ru5P_complex [s]=>Xu5P [s]+RPE [s]
Ribose-5-phosphate isomerase 1 s	Irreversible	R5P [s]+RPI [s]=>RPI_R5P_complex [s]
Ribose-5-phosphate isomerase 1 s_rev	Irreversible	RPI_R5P_complex [s]=>R5P [s]+RPI [s]
Ribose-5-phosphate isomerase 2 s	Irreversible	RPI_R5P_complex [s]=>Ru5P [s]+RPI [s]
Ribose-5-phosphate isomerase 3 s	Irreversible	Ru5P [s]+RPI [s]=>RPI_Ru5P_complex [s]
Ribose-5-phosphate isomerase 3 s_rev	Irreversible	RPI_Ru5P_complex [s]=>Ru5P [s]+RPI [s]
Ribose-5-phosphate isomerase 4 s	Irreversible	RPI_Ru5P_complex [s]=>R5P [s]+RPI [s]
Phosphoribulokinase 1 s	Irreversible	ATP [s]+Ru5P [s]+PRK [s]=>PRK_Ru5P_complex [s]
Phosphoribulokinase 1 s_rev	Irreversible	PRK_Ru5P_complex [s]=>ATP [s]+Ru5P [s]+PRK [s]
Phosphoribulokinase 2 s	Irreversible	PRK_Ru5P_complex [s]=>RuBP [s]+ADP [s]+PRK [s]
Phosphoglucoisomerase 1 s	Irreversible	F6P [s]+PGI [s]=>PGI_F6P_complex [s]
Phosphoglucoisomerase 1 s_rev	Irreversible	PGI_F6P_complex [s]=>F6P [s]+PGI [s]
Phosphoglucoisomerase 2 s	Irreversible	PGI_F6P_complex [s]=>PGI [s]+G6P [s]
Phosphoglucoisomerase 3 s	Irreversible	PGI [s]+G6P [s]=>PGI_G6P_complex [s]
Phosphoglucoisomerase 3 s_rev	Irreversible	PGI_G6P_complex [s]=>PGI [s]+G6P [s]
Phosphoglucoisomerase 4 s	Irreversible	PGI_G6P_complex [s]=>F6P [s]+PGI [s]
Phosphoglucomutase 1 s	Irreversible	G6P [s]+PGM [s]=>PGM_G6P_complex [s]
Phosphoglucomutase 1 s_rev	Irreversible	PGM_G6P_complex [s]=>G6P [s]+PGM [s]
Phosphoglucomutase 2 s	Irreversible	PGM_G6P_complex [s]=>PGM [s]+G1P [s]
Phosphoglucomutase 3 s	Irreversible	PGM [s]+G1P [s]=>PGM_G1P_complex [s]
Phosphoglucomutase 3 s_rev	Irreversible	PGM_G1P_complex [s]=>PGM [s]+G1P [s]
Phosphoglucomutase 4 s	Irreversible	PGM_G1P_complex [s]=>G6P [s]+PGM [s]
Glucose-1-phosphate adenylyltransferase 1 s	Irreversible	ATP [s]+G1P [s]+AGPase [s]=>AGPase_ATP_G1P_complex [s]
Glucose-1-phosphate adenylyltransferase 1 s_rev	Irreversible	AGPase_ATP_G1P_complex [s]=>ATP [s]+G1P [s]+AGPase [s]
Glucose-1-phosphate adenylyltransferase 2 s	Irreversible	AGPase_ATP_G1P_complex [s]=>ADP [s]+AGPase [s]+ADPG [s]
Glucose-1-phosphate adenylyltransferase 3 s	Irreversible	ADP [s]+AGPase [s]+ADPG [s]=>AGPase_ADP_ADPG_complex [s]
Glucose-1-phosphate adenylyltransferase 3 s_rev	Irreversible	AGPase_ADP_ADPG_complex [s]=>ADP [s]+AGPase [s]+ADPG [s]
Glucose-1-phosphate adenylyltransferase 4 s	Irreversible	AGPase_ADP_ADPG_complex [s]=>ATP [s]+G1P [s]+AGPase [s]
ADPGstore s	Irreversible	ADPG [s]=>
ADPGstore s_rev	Irreversible	=>ADPG [s]
Rubisco carboxylase 1 y	Irreversible	CO2 [y]+RuBP [y]+Rubisco [y]=>Rubisco_RuBP_C_complex [y]
Rubisco carboxylase 1 y_rev	Irreversible	Rubisco_RuBP_C_complex [y]=>CO2 [y]+RuBP [y]+Rubisco [y]
Rubisco carboxylase 2 y	Irreversible	Rubisco_RuBP_C_complex [y]=>Rubisco [y]+3PGA [y]
Phosphoglycerate kinase 1 y	Irreversible	3PGA [y]+ATP [y]+PGK [y]=>PGK_3PGA_complex [y]
Phosphoglycerate kinase 1 y_rev	Irreversible	PGK_3PGA_complex [y]=>3PGA [y]+ATP [y]+PGK [y]
Phosphoglycerate kinase 2 y	Irreversible	PGK_3PGA_complex [y]=>PGK [y]+BPGA [y]+ADP [y]
Phosphoglycerate kinase 3 y	Irreversible	PGK [y]+BPGA [y]+ADP [y]=>PGK_BPGA_complex [y]
Phosphoglycerate kinase 3 y_rev	Irreversible	PGK_BPGA_complex [y]=>PGK [y]+BPGA [y]+ADP [y]
Phosphoglycerate kinase 4 y	Irreversible	PGK_BPGA_complex [y]=>3PGA [y]+ATP [y]+PGK [y]
Glyceraldehyde-3-phosphate dehydrogenase 1 y	Irreversible	BPGA [y]+NADPH [y]+GAPDH [y]=>GAPDH_BPGA_complex [y]
Glyceraldehyde-3-phosphate dehydrogenase 1 y_rev	Irreversible	GAPDH_BPGA_complex [y]=>BPGA [y]+NADPH [y]+GAPDH [y]
Glyceraldehyde-3-phosphate dehydrogenase 2 y	Irreversible	GAPDH_BPGA_complex [y]=>GAPDH [y]+GAP [y]+NADP [y]
Glyceraldehyde-3-phosphate dehydrogenase 3 y	Irreversible	GAPDH [y]+GAP [y]+NADP [y]=>GAPDH_GAP_complex [y]
Glyceraldehyde-3-phosphate dehydrogenase 3 y_rev	Irreversible	GAPDH_GAP_complex [y]=>GAPDH [y]+GAP [y]+NADP [y]
Glyceraldehyde-3-phosphate dehydrogenase 4 y	Irreversible	GAPDH_GAP_complex [y]=>BPGA [y]+NADPH [y]+GAPDH [y]
Triosephosphate isomerase 1 y	Irreversible	GAP [y]+TPI [y]=>TPI_GAP_complex [y]
Triosephosphate isomerase 1 y_rev	Irreversible	TPI_GAP_complex [y]=>GAP [y]+TPI [y]
Triosephosphate isomerase 2 y	Irreversible	TPI_GAP_complex [y]=>TPI [y]+DHAP [y]
Triosephosphate isomerase 3 y	Irreversible	TPI [y]+DHAP [y]=>TPI_DHAP_complex [y]
Triosephosphate isomerase 3 y_rev	Irreversible	TPI_DHAP_complex [y]=>TPI [y]+DHAP [y]
Triosephosphate isomerase 4 y	Irreversible	TPI_DHAP_complex [y]=>GAP [y]+TPI [y]
Aldolase 1a y	Irreversible	GAP [y]+DHAP [y]+FBA [y]=>FBA_GAP_DHAP_complex [y]
Aldolase 1a y_rev	Irreversible	FBA_GAP_DHAP_complex [y]=>GAP [y]+DHAP [y]+FBA [y]
Aldolase 2a y	Irreversible	FBA_GAP_DHAP_complex [y]=>FBA [y]+FBP [y]
Aldolase 3a y	Irreversible	FBA [y]+FBP [y]=>FBA_FBP_complex [y]
Aldolase 3a y_rev	Irreversible	FBA_FBP_complex [y]=>FBA [y]+FBP [y]
Aldolase 4a y	Irreversible	FBA_FBP_complex [y]=>GAP [y]+DHAP [y]+FBA [y]
Fructose-1,6-bisphosphatase 1 y	Irreversible	FBP [y]+FBPase [y]=>FBPase_FBP_complex [y]
Fructose-1,6-bisphosphatase 1 y_rev	Irreversible	FBPase_FBP_complex [y]=>FBP [y]+FBPase [y]
Fructose-1,6-bisphosphatase 2 y	Irreversible	FBPase_FBP_complex [y]=>FBPase [y]+F6P [y]
Transketolase 1a y	Irreversible	GAP [y]+F6P [y]+TRK [y]=>TRK_F6P_GAP_complex [y]
Transketolase 1a y_rev	Irreversible	TRK_F6P_GAP_complex [y]=>GAP [y]+F6P [y]+TRK [y]
Transketolase 2a y	Irreversible	TRK_F6P_GAP_complex [y]=>TRK [y]+E4P [y]+Xu5P [y]
Transketolase 3a y	Irreversible	TRK [y]+E4P [y]+Xu5P [y]=>TRK_E4P_Xu5P_complex [y]
Transketolase 3a y_rev	Irreversible	TRK_E4P_Xu5P_complex [y]=>TRK [y]+E4P [y]+Xu5P [y]
Transketolase 4a y	Irreversible	TRK_E4P_Xu5P_complex [y]=>GAP [y]+F6P [y]+TRK [y]
Aldolase 1b y	Irreversible	DHAP [y]+E4P [y]+SBA [y]=>SBA_DHAP_E4P_complex [y]
Aldolase 1b y_rev	Irreversible	SBA_DHAP_E4P_complex [y]=>DHAP [y]+E4P [y]+SBA [y]
Aldolase 2b y	Irreversible	SBA_DHAP_E4P_complex [y]=>SBA [y]+SBP [y]
Aldolase 3b y	Irreversible	SBA [y]+SBP [y]=>SBA_SBP_complex [y]
Aldolase 3b y_rev	Irreversible	SBA_SBP_complex [y]=>SBA [y]+SBP [y]
Aldolase 4b y	Irreversible	SBA_SBP_complex [y]=>DHAP [y]+E4P [y]+SBA [y]
Sedoheptulose-1,7-phosphatase 1 y	Irreversible	SBP [y]+SBPase [y]=>SBPase_SBP_complex [y]
Sedoheptulose-1,7-phosphatase 1 y_rev	Irreversible	SBPase_SBP_complex [y]=>SBP [y]+SBPase [y]
Sedoheptulose-1,7-phosphatase 2 y	Irreversible	SBPase_SBP_complex [y]=>SBPase [y]+S7P [y]
Transketolase 1b y	Irreversible	GAP [y]+TRK [y]+S7P [y]=>TRK_S7P_GAP_complex [y]
Transketolase 1b y_rev	Irreversible	TRK_S7P_GAP_complex [y]=>GAP [y]+TRK [y]+S7P [y]
Transketolase 2b y	Irreversible	TRK_S7P_GAP_complex [y]=>TRK [y]+Xu5P [y]+R5P [y]
Transketolase 3b y	Irreversible	TRK [y]+Xu5P [y]+R5P [y]=>TRK_R5P_Xu5P_complex [y]
Transketolase 3b y_rev	Irreversible	TRK_R5P_Xu5P_complex [y]=>TRK [y]+Xu5P [y]+R5P [y]
Transketolase 4b y	Irreversible	TRK_R5P_Xu5P_complex [y]=>GAP [y]+TRK [y]+S7P [y]
Ribulose-5-phosphate epimerase 1 y	Irreversible	Xu5P [y]+RPE [y]=>RPE_Xu5P_complex [y]
Ribulose-5-phosphate epimerase 1 y_rev	Irreversible	RPE_Xu5P_complex [y]=>Xu5P [y]+RPE [y]
Ribulose-5-phosphate epimerase 2 y	Irreversible	RPE_Xu5P_complex [y]=>RPE [y]+Ru5P [y]
Ribulose-5-phosphate epimerase 3 y	Irreversible	RPE [y]+Ru5P [y]=>RPE_Ru5P_complex [y]
Ribulose-5-phosphate epimerase 3 y_rev	Irreversible	RPE_Ru5P_complex [y]=>RPE [y]+Ru5P [y]
Ribulose-5-phosphate epimerase 4 y	Irreversible	RPE_Ru5P_complex [y]=>Xu5P [y]+RPE [y]
Ribose-5-phosphate isomerase 1 y	Irreversible	R5P [y]+RPI [y]=>RPI_R5P_complex [y]
Ribose-5-phosphate isomerase 1 y_rev	Irreversible	RPI_R5P_complex [y]=>R5P [y]+RPI [y]
Ribose-5-phosphate isomerase 2 y	Irreversible	RPI_R5P_complex [y]=>Ru5P [y]+RPI [y]
Ribose-5-phosphate isomerase 3 y	Irreversible	Ru5P [y]+RPI [y]=>RPI_Ru5P_complex [y]
Ribose-5-phosphate isomerase 3 y_rev	Irreversible	RPI_Ru5P_complex [y]=>Ru5P [y]+RPI [y]
Ribose-5-phosphate isomerase 4 y	Irreversible	RPI_Ru5P_complex [y]=>R5P [y]+RPI [y]
Phosphoribulokinase 1 y	Irreversible	ATP [y]+Ru5P [y]+PRK [y]=>PRK_Ru5P_complex [y]
Phosphoribulokinase 1 y_rev	Irreversible	PRK_Ru5P_complex [y]=>ATP [y]+Ru5P [y]+PRK [y]
Phosphoribulokinase 2 y	Irreversible	PRK_Ru5P_complex [y]=>RuBP [y]+ADP [y]+PRK [y]
Phosphoglucoisomerase 1 y	Irreversible	F6P [y]+PGI [y]=>PGI_F6P_complex [y]
Phosphoglucoisomerase 1 y_rev	Irreversible	PGI_F6P_complex [y]=>F6P [y]+PGI [y]
Phosphoglucoisomerase 2 y	Irreversible	PGI_F6P_complex [y]=>PGI [y]+G6P [y]
Phosphoglucoisomerase 3 y	Irreversible	PGI [y]+G6P [y]=>PGI_G6P_complex [y]
Phosphoglucoisomerase 3 y_rev	Irreversible	PGI_G6P_complex [y]=>PGI [y]+G6P [y]
Phosphoglucoisomerase 4 y	Irreversible	PGI_G6P_complex [y]=>F6P [y]+PGI [y]
Phosphoglucomutase 1 y	Irreversible	G6P [y]+PGM [y]=>PGM_G6P_complex [y]
Phosphoglucomutase 1 y_rev	Irreversible	PGM_G6P_complex [y]=>G6P [y]+PGM [y]
Phosphoglucomutase 2 y	Irreversible	PGM_G6P_complex [y]=>PGM [y]+G1P [y]
Phosphoglucomutase 3 y	Irreversible	PGM [y]+G1P [y]=>PGM_G1P_complex [y]
Phosphoglucomutase 3 y_rev	Irreversible	PGM_G1P_complex [y]=>PGM [y]+G1P [y]
Phosphoglucomutase 4 y	Irreversible	PGM_G1P_complex [y]=>G6P [y]+PGM [y]
Glucose-1-phosphate adenylyltransferase 1 y	Irreversible	ATP [y]+G1P [y]+AGPase [y]=>AGPase_ATP_G1P_complex [y]
Glucose-1-phosphate adenylyltransferase 1 y_rev	Irreversible	AGPase_ATP_G1P_complex [y]=>ATP [y]+G1P [y]+AGPase [y]
Glucose-1-phosphate adenylyltransferase 2 y	Irreversible	AGPase_ATP_G1P_complex [y]=>ADP [y]+AGPase [y]+ADPG [y]
Glucose-1-phosphate adenylyltransferase 3 y	Irreversible	ADP [y]+AGPase [y]+ADPG [y]=>AGPase_ADP_ADPG_complex [y]
Glucose-1-phosphate adenylyltransferase 3 y_rev	Irreversible	AGPase_ADP_ADPG_complex [y]=>ADP [y]+AGPase [y]+ADPG [y]
Glucose-1-phosphate adenylyltransferase 4 y	Irreversible	AGPase_ADP_ADPG_complex [y]=>ATP [y]+G1P [y]+AGPase [y]
ADPGstore y	Irreversible	ADPG [y]=>
ADPGstore y_rev	Irreversible	=>ADPG [y]
Diffusion RuBP	Irreversible	RuBP [s]=>RuBP [y]
Diffusion RuBP_rev	Irreversible	RuBP [y]=>RuBP [s]
Diffusion 3PGA	Irreversible	3PGA [s]=>3PGA [y]
Diffusion 3PGA_rev	Irreversible	3PGA [y]=>3PGA [s]
Diffusion GAP	Irreversible	GAP [s]=>GAP [y]
Diffusion GAP_rev	Irreversible	GAP [y]=>GAP [s]
Diffusion DHAP	Irreversible	DHAP [s]=>DHAP [y]
Diffusion DHAP_rev	Irreversible	DHAP [y]=>DHAP [s]
Diffusion FBP	Irreversible	FBP [s]=>FBP [y]
Diffusion FBP_rev	Irreversible	FBP [y]=>FBP [s]
Diffusion F6P	Irreversible	F6P [s]=>F6P [y]
Diffusion F6P_rev	Irreversible	F6P [y]=>F6P [s]
Diffusion E4P	Irreversible	E4P [s]=>E4P [y]
Diffusion E4P_rev	Irreversible	E4P [y]=>E4P [s]
Diffusion Xu5P	Irreversible	Xu5P [s]=>Xu5P [y]
Diffusion Xu5P_rev	Irreversible	Xu5P [y]=>Xu5P [s]
Diffusion SBP	Irreversible	SBP [s]=>SBP [y]
Diffusion SBP_rev	Irreversible	SBP [y]=>SBP [s]
Diffusion S7P	Irreversible	S7P [s]=>S7P [y]
Diffusion S7P_rev	Irreversible	S7P [y]=>S7P [s]
Diffusion R5P	Irreversible	R5P [s]=>R5P [y]
Diffusion R5P_rev	Irreversible	R5P [y]=>R5P [s]
Diffusion Ru5P	Irreversible	Ru5P [s]=>Ru5P [y]
Diffusion Ru5P_rev	Irreversible	Ru5P [y]=>Ru5P [s]
Diffusion BPGA	Irreversible	BPGA [s]=>BPGA [y]
Diffusion BPGA_rev	Irreversible	BPGA [y]=>BPGA [s]
Diffusion G1P	Irreversible	G1P [s]=>G1P [y]
Diffusion G1P_rev	Irreversible	G1P [y]=>G1P [s]
Diffusion G6P	Irreversible	G6P [s]=>G6P [y]
Diffusion G6P_rev	Irreversible	G6P [y]=>G6P [s]
Diffusion ADPG	Irreversible	ADPG [s]=>ADPG [y]
Diffusion ADPG_rev	Irreversible	ADPG [y]=>ADPG [s]
FNR	Irreversible	NADP [s]=>NADPH [s]
ATPase	Irreversible	ADP [s]=>ATP [s]
Diffusion ADP	Irreversible	ADP [s]=>ADP [y]
Diffusion ADP_rev	Irreversible	ADP [y]=>ADP [s]
Diffusion ATP	Irreversible	ATP [s]=>ATP [y]
Diffusion ATP_rev	Irreversible	ATP [y]=>ATP [s]
Diffusion NADP	Irreversible	NADP [s]=>NADP [y]
Diffusion NADP_rev	Irreversible	NADP [y]=>NADP [s]
Diffusion NADPH	Irreversible	NADPH [s]=>NADPH [y]
Diffusion NADPH_rev	Irreversible	NADPH [y]=>NADPH [s]
Diffusion DHAP s-c	Irreversible	DHAP [s]=>
Diffusion DHAP s-c_rev	Irreversible	=>DHAP [s]
Diffusion BPGA s-c	Irreversible	BPGA [s]=>
Diffusion BPGA s-c_rev	Irreversible	=>BPGA [s]
Diffusion GAP s-c	Irreversible	GAP [s]=>
Diffusion GAP s-c_rev	Irreversible	=>GAP [s]
Diffusion 3PGA s-c	Irreversible	3PGA [s]=>
Diffusion 3PGA s-c_rev	Irreversible	=>3PGA [s]

## Sheet: C_metabolites
Model metabolite name	Full name	Microcompartment	Type
3PGA [s]	3-phospho-D-glycerate	stroma	metabolite
3PGA [y]	3-phospho-D-glycerate	pyrenoid	metabolite
ADP [s]	adenosine diphosphate	stroma	metabolite
ADP [y]	adenosine diphosphate	pyrenoid	metabolite
ADPG [s]	ADP-glucose	stroma	metabolite
ADPG [y]	ADP-glucose	pyrenoid	metabolite
AGPase [s]	Glucose-1-phosphate adenylyltransferase	stroma	enzyme
AGPase [y]	Glucose-1-phosphate adenylyltransferase	pyrenoid	enzyme
AGPase_ADP_ADPG_complex [s]		stroma	complex
AGPase_ADP_ADPG_complex [y]		pyrenoid	complex
AGPase_ATP_G1P_complex [s]		stroma	complex
AGPase_ATP_G1P_complex [y]		pyrenoid	complex
ATP [s]	adenosine triphosphate	stroma	metabolite
ATP [y]	adenosine triphosphate	pyrenoid	metabolite
BPGA [s]	1,3-bisphospho-D-glycerate	stroma	metabolite
BPGA [y]	1,3-bisphospho-D-glycerate	pyrenoid	metabolite
CO2 [s]	carbon dioxide	stroma	metabolite
CO2 [y]	carbon dioxide	pyrenoid	metabolite
DHAP [s]	dihydroxyacetone phosphate	stroma	metabolite
DHAP [y]	dihydroxyacetone phosphate	pyrenoid	metabolite
E4P [s]	D-Erythrose-4-phosphate	stroma	metabolite
E4P [y]	D-Erythrose-4-phosphate	pyrenoid	metabolite
F6P [s]	D-fructose-6-phosphate	stroma	metabolite
F6P [y]	D-fructose-6-phosphate	pyrenoid	metabolite
FBA [s]	Aldolase	stroma	enzyme
FBA [y]	Aldolase	pyrenoid	enzyme
FBA_FBP_complex [s]		stroma	complex
FBA_FBP_complex [y]		pyrenoid	complex
FBA_GAP_DHAP_complex [s]		stroma	complex
FBA_GAP_DHAP_complex [y]		pyrenoid	complex
FBP [s]	fructose-1,6-bisphosphate	stroma	metabolite
FBP [y]	fructose-1,6-bisphosphate	pyrenoid	metabolite
FBPase [s]	fructose-1,6-bisphosphatase	stroma	enzyme
FBPase [y]	fructose-1,6-bisphosphatase	pyrenoid	enzyme
FBPase_FBP_complex [s]		stroma	complex
FBPase_FBP_complex [y]		pyrenoid	complex
G1P [s]	alpha-D-glucose-1-phosphate	stroma	metabolite
G1P [y]	alpha-D-glucose-1-phosphate	pyrenoid	metabolite
G6P [s]	alpha-D-glucose-6-phosphate	stroma	metabolite
G6P [y]	alpha-D-glucose-6-phosphate	pyrenoid	metabolite
GAP [s]	D-glyceraldehyde-3-phosphate	stroma	metabolite
GAP [y]	D-glyceraldehyde-3-phosphate	pyrenoid	metabolite
GAPDH [s]	glycerinaldehyd-3-phosphat-dehydrogenase	stroma	enzyme
GAPDH [y]	glycerinaldehyd-3-phosphat-dehydrogenase	pyrenoid	enzyme
GAPDH_BPGA_complex [s]		stroma	complex
GAPDH_BPGA_complex [y]		pyrenoid	complex
GAPDH_GAP_complex [s]		stroma	complex
GAPDH_GAP_complex [y]		pyrenoid	complex
NADP [s]	oxidized nicotinamide adenine dinucleotide phosphate	stroma	metabolite
NADP [y]	oxidized nicotinamide adenine dinucleotide phosphate	pyrenoid	metabolite
NADPH [s]	reduced nicotinamide adenine dinucleotide phosphate	stroma	metabolite
NADPH [y]	reduced nicotinamide adenine dinucleotide phosphate	pyrenoid	metabolite
PGI [s]	Phosphoglucoisomerase	stroma	enzyme
PGI [y]	Phosphoglucoisomerase	pyrenoid	enzyme
PGI_F6P_complex [s]		stroma	complex
PGI_F6P_complex [y]		pyrenoid	complex
PGI_G6P_complex [s]		stroma	complex
PGI_G6P_complex [y]		pyrenoid	complex
PGK [s]	Phosphoglycerate kinase	stroma	enzyme
PGK [y]	Phosphoglycerate kinase	pyrenoid	enzyme
PGK_3PGA_complex [s]		stroma	complex
PGK_3PGA_complex [y]		pyrenoid	complex
PGK_BPGA_complex [s]		stroma	complex
PGK_BPGA_complex [y]		pyrenoid	complex
PGM [s]	Phosphoglucomutase	stroma	enzyme
PGM [y]	Phosphoglucomutase	pyrenoid	enzyme
PGM_G1P_complex [s]		stroma	complex
PGM_G1P_complex [y]		pyrenoid	complex
PGM_G6P_complex [s]		stroma	complex
PGM_G6P_complex [y]		pyrenoid	complex
PRK [s]	phosphoribulokinase	stroma	enzyme
PRK [y]	phosphoribulokinase	pyrenoid	enzyme
PRK_Ru5P_complex [s]		stroma	complex
PRK_Ru5P_complex [y]		pyrenoid	complex
R5P [s]	D-ribose 5-phosphate	stroma	metabolite
R5P [y]	D-ribose 5-phosphate	pyrenoid	metabolite
RPE [s]	Ribulose-5-phosphate epimerase	stroma	enzyme
RPE [y]	Ribulose-5-phosphate epimerase	pyrenoid	enzyme
RPE_Ru5P_complex [s]		stroma	complex
RPE_Ru5P_complex [y]		pyrenoid	complex
RPE_Xu5P_complex [s]		stroma	complex
RPE_Xu5P_complex [y]		pyrenoid	complex
RPI [s]	Ribose-5-phosphate isomerase	stroma	enzyme
RPI [y]	Ribose-5-phosphate isomerase	pyrenoid	enzyme
RPI_R5P_complex [s]		stroma	complex
RPI_R5P_complex [y]		pyrenoid	complex
RPI_Ru5P_complex [s]		stroma	complex
RPI_Ru5P_complex [y]		pyrenoid	complex
Ru5P [s]	D-ribulose 5-phosphate	stroma	metabolite
Ru5P [y]	D-ribulose 5-phosphate	pyrenoid	metabolite
Rubisco [s]	ribulose-1,5-bisphosphate carboxylase	stroma	enzyme
Rubisco [y]	ribulose-1,5-bisphosphate carboxylase	pyrenoid	enzyme
Rubisco_RuBP_C_complex [s]		stroma	complex
Rubisco_RuBP_C_complex [y]		pyrenoid	complex
RuBP [s]	D-ribulose-1,5-bisphosphate	stroma	metabolite
RuBP [y]	D-ribulose-1,5-bisphosphate	pyrenoid	metabolite
S7P [s]	D-sedoheptulose 7-phosphate	stroma	metabolite
S7P [y]	D-sedoheptulose 7-phosphate	pyrenoid	metabolite
SBA [s]	Aldolase	stroma	enzyme
SBA [y]	Aldolase	pyrenoid	enzyme
SBA_DHAP_E4P_complex [s]		stroma	complex
SBA_DHAP_E4P_complex [y]		pyrenoid	complex
SBA_SBP_complex [s]		stroma	complex
SBA_SBP_complex [y]		pyrenoid	complex
SBP [s]	D-sedoheptulose-1,7-bisphosphate	stroma	metabolite
SBP [y]	D-sedoheptulose-1,7-bisphosphate	pyrenoid	metabolite
SBPase [s]	sedulose-1,7-bisphosphatase	stroma	enzyme
SBPase [y]	sedulose-1,7-bisphosphatase	pyrenoid	enzyme
SBPase_SBP_complex [s]		stroma	complex
SBPase_SBP_complex [y]		pyrenoid	complex
TPI [s]	Triosephosphate isomerase	stroma	enzyme
TPI [y]	Triosephosphate isomerase	pyrenoid	enzyme
TPI_DHAP_complex [s]		stroma	complex
TPI_DHAP_complex [y]		pyrenoid	complex
TPI_GAP_complex [s]		stroma	complex
TPI_GAP_complex [y]		pyrenoid	complex
TRK [s]	Transketolase	stroma	enzyme
TRK [y]	Transketolase	pyrenoid	enzyme
TRK_E4P_Xu5P_complex [s]		stroma	complex
TRK_E4P_Xu5P_complex [y]		pyrenoid	complex
TRK_F6P_GAP_complex [s]		stroma	complex
TRK_F6P_GAP_complex [y]		pyrenoid	complex
TRK_R5P_Xu5P_complex [s]		stroma	complex
TRK_R5P_Xu5P_complex [y]		pyrenoid	complex
TRK_S7P_GAP_complex [s]		stroma	complex
TRK_S7P_GAP_complex [y]		pyrenoid	complex
Xu5P [s]	D-xylulose 5-phosphate	stroma	metabolite
Xu5P [y]	D-xylulose 5-phosphate	pyrenoid	metabolite
