# Supplementary material for: Effects of microcompartmentation on flux distribution and metabolic pools in Chlamydomonas reinhardtii chloroplasts
Source: eLife journal article supplement (doi:10.7554/elife.37960), 2018-10-11
Supplement: supp [file elife-37960-supp-v1.zip › elife_poa_e37960_Supplementary_File_4.xlsx]

## Sheet: A_kcat_literature
Supplemental Table 4A. Enzymatic turnover rates collected from BRENDA used for model parameterization.
Enzyme	EC-number	Substrate	Organism	kcat [s-1]	Reference
RPI	5.3.1.6	R5P	Spinacia oleaceae	3440	Jung et al. (2000)
RPE	5.1.3.1	Ru5P	Spinacia oleaceae	0.1382	Teige et al. (1998)
TRK	2.2.1.1	Xu5P	Spinacia oleaceae	0.0186	Teige et al. (1998)
TRK	2.2.1.1	R5P	Spinacia oleaceae	0.0148	Teige et al. (1998)
SBPase (red)	3.1.3.37	SBP	Spinacia oleaceae	81	Cadet & Meunier (1988)
FBPase (red)	3.1.3.11	FBP	Spinacia oleaceae	0.42	Cadet & Meunier (1988)
FBA	4.1.2.13	FBP	Dacus carota	64.5	Moorhead & Planxton (1990)
SBA	4.1.2.13	SBP	Dacus carota	25.2	Moorhead & Planxton (1990)
TPI	5.3.1.1	GAP	Chlamydomonas reinhardtii	3372	Zaffagnini et al. (2014)
GAPDH	1.2.1.13	NADPH	Chlamydomonas reinhardtii	430	Graciet et al. (2004)
GAPDH	1.2.1.13	BPGA	Chlamydomonas reinhardtii	223	Graciet et al. (2003)
PGK	2.7.2.3	3PGA	Chlamydomonas reinhardtii	84.7	Morisse et al. (2014)
RuBisCO	4.1.1.39	RuBP	Chlamydomonas reinhardtii	5.8	Tcherkez et al. (2006)

## Sheet: B_rate constants
Supplemental Table 4B. Predicted rate constants for CBC enzymes from model simulation.
enzyme	microcompartment	substrate	kcat BRENDA [s-1]		average rate constant predicted high CO2	standard deviation	average rate constant predicted low CO2	standard deviation
RPI	stroma	R5P	3440		3440	2.72985e-12	3440	2.72985e-12
RPE	stroma	Ru5P	0.1382		9274.45	1520.25	9197.78	1578.22
TRK	stroma	R5P	0.0148		5420.43	3795.38	5611.44	3749.71
SBPase (red)	stroma	SBP	81		81	1.4218e-14	81	1.4218e-14
FBPase (red)	stroma	FBP	0.42		5324.31	3235.4	5261.97	3285
FBA	stroma	FBP	64.5		64.5	0	64.5	0
SBA	stroma	SBP	25.2		25.2	4.5142e-13	25.2	4.5142e-13
TPI	stroma	GAP	3372		3372	2.27487e-12	3372	2.27487e-12
GAPDH	stroma	NADPH	430		10000	7.2796e-12	10000	7.2796e-12
PGK	stroma	3PGA	84.7		84.7	1.60663e-12	84.7	1.60663e-12
RuBisCO	stroma	RuBP	5.8		5.8	1.06635e-13	5.8	1.06635e-13
	pyrenoid				0.0712086	1.87359e-15	0.12975	1.12244e-15
