# Supplementary material for: Effects of microcompartmentation on flux distribution and metabolic pools in Chlamydomonas reinhardtii chloroplasts
Source: eLife journal article supplement (doi:10.7554/elife.37960), 2018-10-11
Supplement: supp [file elife-37960-supp-v1.zip › elife_poa_e37960_Supplementary_File_5.xlsx]

## Sheet: A_concentration
Supplementary Table 5A. Simulated metabolite concentration in µM over 1,000 samples. The full metabolite name is given in Supplementary file 3. [s] denotes the concentration in the stroma, [y] the concentration in the pyrenoid.
metabolite	average	standard deviation	SAMPLE 1	SAMPLE 2	SAMPLE 3	SAMPLE 4	SAMPLE 5	SAMPLE 6	SAMPLE 7	SAMPLE 8	SAMPLE 9	SAMPLE 10	SAMPLE 11	SAMPLE 12	SAMPLE 13	SAMPLE 14	SAMPLE 15	SAMPLE 16	SAMPLE 17	SAMPLE 18	SAMPLE 19	SAMPLE 20	SAMPLE 21	SAMPLE 22	SAMPLE 23	SAMPLE 24	SAMPLE 25	SAMPLE 26	SAMPLE 27	SAMPLE 28	SAMPLE 29	SAMPLE 30	SAMPLE 31	SAMPLE 32	SAMPLE 33	SAMPLE 34	SAMPLE 35	SAMPLE 36	SAMPLE 37	SAMPLE 38	SAMPLE 39	SAMPLE 40	SAMPLE 41	SAMPLE 42	SAMPLE 43	SAMPLE 44	SAMPLE 45	SAMPLE 46	SAMPLE 47
CO2 [s]	0.0536687	0.0261655	0.0306132	0.0524966	0.0438934	0.0936012	0.0484968	0.0910239	0.0330585	0.0537646	0.0255021	0.0724591	0.0179686	0.0884914	0.0481502	0.0231843	0.0791656	0.0635352	0.0869278	0.0843831	0.0213959	0.0566448	0.0498745	0.0874606	0.0748052	0.0695617	0.0622526	0.0775694	0.0221157	0.0382585	0.0707638	0.01	0.0312054	0.0480214	0.0538538	0.0191649	0.0726328	0.0419219	0.0349896	0.0199885	0.0308577	0.0833163	0.0478372	0.0510066	0.089643	0.0638544	0.0843015	0.092485	0.0988416
CO2 [y]	0.0455192	0.0253925	0.0219468	0.0438302	0.0352276	0.084935	0.0398305	0.0823576	0.0243917	0.0450982	0.0168355	0.0637921	0.01	0.0798254	0.0394839	0.0145184	0.0704993	0.0548692	0.0782608	0.0757167	0.0127294	0.047979	0.0412083	0.0787947	0.0661392	0.0608955	0.0535866	0.0689032	0.0134486	0.029592	0.062097	0.01	0.0225391	0.0393546	0.0451869	0.0104983	0.0639668	0.0332558	0.0263226	0.0113215	0.0221912	0.0746505	0.039171	0.0423402	0.0809771	0.0551886	0.0756355	0.0838192	0.0901755
RuBP [s]	0.0544466	0.0264546	0.0843557	0.0928473	0.0489209	0.0311409	0.0698336	0.0215475	0.0862882	0.0981797	0.0774803	0.0883041	0.0898827	0.0764231	0.0567019	0.0868992	0.0304642	0.0860088	0.0359852	0.0654688	0.010247	0.0639582	0.0904487	0.0298316	0.0640739	0.0335117	0.0970163	0.0275204	0.0899923	0.0989131	0.0276424	0.0494049	0.0912877	0.023753	0.0767231	0.0723194	0.0174023	0.0776203	0.0923903	0.0619103	0.0702924	0.0700287	0.0416336	0.052615	0.0776158	0.0201541	0.0718043	0.0853124	0.0128586
Rubisco [s]	47.7838	64.5917	27.2815	13.7685	32.2057	29.3146	14.8584	45.7056	29.9054	15.6854	28.3824	12.8139	39.2996	14.6351	31.4414	23.9673	34.3623	14.1243	14.0654	6.21329	179.941	17.2113	13.7072	37.9957	15.4338	24.0947	10.3634	15.4138	42.9132	21.6128	46.5865	187.073	21.5741	51.7847	10.1443	23.0103	46.1967	22.6039	25.252	77.3482	15.5553	8.53452	49.724	28.4583	8.56275	71.1043	7.40972	12.1831	38.7163
Rubisco_RuBP_C_complex [s]	53.6787	0.000609571	53.6787	53.6785	53.6796	53.679	53.6788	53.6788	53.6778	53.6788	53.6783	53.6776	53.6784	53.6792	53.6788	53.6796	53.6788	53.6794	53.6777	53.6785	53.6784	53.6796	53.6789	53.6795	53.6794	53.6789	53.6793	53.679	53.6776	53.6785	53.6779	53.6775	53.679	53.6779	53.6779	53.6783	53.6793	53.6792	53.6776	53.6776	53.6783	53.6796	53.6788	53.6788	53.6796	53.6796	53.6792	53.6796	53.6791
3PGA [s]	844.003	5.23221e-12	844.003	844.003	844.003	844.003	844.003	844.003	844.003	844.003	844.003	844.003	844.003	844.003	844.003	844.003	844.003	844.003	844.003	844.003	844.003	844.003	844.003	844.003	844.003	844.003	844.003	844.003	844.003	844.003	844.003	844.003	844.003	844.003	844.003	844.003	844.003	844.003	844.003	844.003	844.003	844.003	844.003	844.003	844.003	844.003	844.003	844.003	844.003
ATP [s]	0.101616	0.0395396	0.108268	0.0365142	0.0990243	0.0661444	0.107492	0.0113203	0.0830543	0.0322802	0.121275	0.0890971	0.097314	0.05521	0.0647833	0.0935227	0.0700919	0.0339311	0.0594242	0.123407	0.108923	0.101155	0.0307095	0.112373	0.0593681	0.0861695	0.0430649	0.0930284	0.11644	0.123521	0.0455729	0.151093	0.0341416	0.0350914	0.0784191	0.133219	0.134946	0.124185	0.155324	0.0957166	0.128615	0.0935356	0.0413209	0.129996	0.0639599	0.0973581	0.0925124	0.126806	0.0892939
PGK [s]	0.0168726	0.0217611	0.01	0.01	0.01	0.01	0.01	0.01	0.01	0.01	0.01	0.01	0.01	0.0134016	0.0204228	0.01	0.0679965	0.0277184	0.0251052	0.01	0.01	0.01	0.01	0.01	0.01	0.01	0.0197945	0.01	0.01	0.0384381	0.01	0.01	0.01	0.01	0.0289613	0.0606936	0.01	0.01	0.01	0.01	0.0210485	0.01	0.01	0.01	0.01	0.01	0.01	0.0248872	0.01
PGK_3PGA_complex [s]	9.70819	1.03402	9.02208	10.4552	11.1213	9.94533	9.96765	9.93371	9.4628	9.38058	10.5614	11.0622	10.4329	8.46433	9.70153	9.50252	7.30999	8.53333	9.11721	10.841	9.36545	7.02483	10.718	10.044	11.4369	10.1757	9.10047	11.0343	9.32927	9.33905	8.94857	9.01321	9.48136	9.23447	8.83413	8.66227	10.1845	8.92903	7.72117	10.1746	7.02132	11.4778	10.8037	9.80455	8.60387	8.48099	9.90595	7.83682	10.2362
BPGA [s]	0.911523	1.63284e-14	0.911523	0.911523	0.911523	0.911523	0.911523	0.911523	0.911523	0.911523	0.911523	0.911523	0.911523	0.911523	0.911523	0.911523	0.911523	0.911523	0.911523	0.911523	0.911523	0.911523	0.911523	0.911523	0.911523	0.911523	0.911523	0.911523	0.911523	0.911523	0.911523	0.911523	0.911523	0.911523	0.911523	0.911523	0.911523	0.911523	0.911523	0.911523	0.911523	0.911523	0.911523	0.911523	0.911523	0.911523	0.911523	0.911523	0.911523
ADP [s]	1.99418	1.26394	0.371282	1.70685	1.38997	0.600242	1.16981	0.14559	0.478913	0.589793	1.8631	0.584897	1.19544	0.131521	0.726612	1.94441	0.22987	0.521078	0.528684	1.97711	1.71009	0.225703	1.5241	0.645416	2.39693	0.9552	0.394827	1.68974	1.43303	0.48147	0.1581	1.78331	0.1194	0.145045	0.542933	0.252713	1.96819	0.797845	2.01925	0.941867	0.448499	0.573476	1.20682	1.27419	0.249432	0.972444	2.22421	0.413729	0.998818
PGK_BPGA_complex [s]	0.0158312	0.00597692	0.01	0.01	0.01	0.01	0.01	0.01	0.01	0.01	0.01	0.01	0.01	0.01	0.01	0.0107002	0.0105423	0.0115327	0.0111195	0.01	0.01	0.01	0.01	0.01	0.0112268	0.01	0.01	0.0135932	0.0124665	0.0124959	0.01	0.01	0.01	0.01	0.01	0.0120836	0.0133871	0.01	0.0113632	0.01	0.01	0.01	0.01	0.0114805	0.01	0.01	0.010729	0.01	0.01
NADPH [s]	4.38724	2.75114	10.6022	6.53987	1.96712	10.5805	6.27278	3.73066	5.63876	9.19203	1.91252	3.10876	4.71702	4.90007	10.083	1.59346	4.46605	3.70732	2.63073	9.04498	1.93219	3.20852	10.2326	9.61775	9.70839	2.02879	1.66897	1.65887	2.20905	3.84547	1.75662	4.25248	2.32059	8.69633	6.36741	3.87825	2.19477	2.03229	2.83807	2.19812	4.52582	3.81263	9.62626	4.19889	10.3222	1.8749	6.56721	4.61507	6.74975
GAPDH [s]	0.0315688	0.0151156	0.01	0.0154168	0.0490329	0.01	0.0173371	0.027344	0.0185538	0.01	0.0569197	0.033844	0.0219452	0.0202841	0.01	0.0562675	0.0219597	0.0238726	0.0375698	0.01	0.0531584	0.0294088	0.01	0.01	0.01	0.0534521	0.0563267	0.0566059	0.0452313	0.0245003	0.0513909	0.0251455	0.0449559	0.01207	0.0150959	0.0252871	0.04197	0.0491317	0.0322337	0.0462265	0.0200489	0.0252529	0.01	0.0255573	0.01	0.0504884	0.0140692	0.0203413	0.0153574
GAPDH_BPGA_complex [s]	0.0848641	0.00403161	0.0810137	0.0810361	0.0814834	0.0798001	0.0803352	0.0797839	0.0813338	0.0809215	0.0819003	0.080313	0.0805764	0.0824306	0.0818262	0.0805042	0.0796532	0.0800529	0.0802298	0.0817382	0.0810377	0.0799498	0.0808942	0.0814136	0.0823069	0.0814707	0.0807798	0.0796985	0.0803016	0.0801299	0.0804517	0.0837558	0.0833572	0.0798387	0.0819552	0.0822528	0.0801878	0.081602	0.07978	0.0798037	0.0798362	0.0813201	0.0800228	0.079722	0.0808004	0.0841548	0.0827791	0.0817357	0.0831877
GAP [s]	21.7204	2.52369e-13	21.7204	21.7204	21.7204	21.7204	21.7204	21.7204	21.7204	21.7204	21.7204	21.7204	21.7204	21.7204	21.7204	21.7204	21.7204	21.7204	21.7204	21.7204	21.7204	21.7204	21.7204	21.7204	21.7204	21.7204	21.7204	21.7204	21.7204	21.7204	21.7204	21.7204	21.7204	21.7204	21.7204	21.7204	21.7204	21.7204	21.7204	21.7204	21.7204	21.7204	21.7204	21.7204	21.7204	21.7204	21.7204	21.7204	21.7204
NADP [s]	0.0796	5.83159e-16	0.0796	0.0796	0.0796	0.0796	0.0796	0.0796	0.0796	0.0796	0.0796	0.0796	0.0796	0.0796	0.0796	0.0796	0.0796	0.0796	0.0796	0.0796	0.0796	0.0796	0.0796	0.0796	0.0796	0.0796	0.0796	0.0796	0.0796	0.0796	0.0796	0.0796	0.0796	0.0796	0.0796	0.0796	0.0796	0.0796	0.0796	0.0796	0.0796	0.0796	0.0796	0.0796	0.0796	0.0796	0.0796	0.0796	0.0796
GAPDH_GAP_complex [s]	0.0491354	0.0264885	0.0123219	0.0252188	0.0828919	0.01	0.0292398	0.0470925	0.0303447	0.0132852	0.0961108	0.0578015	0.0369657	0.0322395	0.01	0.0963792	0.037914	0.0408214	0.0643264	0.01	0.0904703	0.0504965	0.01	0.01	0.01	0.0905452	0.096206	0.09777	0.077501	0.0418297	0.0880005	0.0393195	0.0739692	0.0206297	0.0237448	0.0410673	0.0719761	0.082944	0.0555504	0.0797195	0.0344272	0.0419409	0.0142339	0.0440651	0.01	0.082737	0.0211458	0.0330334	0.0229645
TPI [s]	0.01	1.68352e-16	0.01	0.01	0.01	0.01	0.01	0.01	0.01	0.01	0.01	0.01	0.01	0.01	0.01	0.01	0.01	0.01	0.01	0.01	0.01	0.01	0.01	0.01	0.01	0.01	0.01	0.01	0.01	0.01	0.01	0.01	0.01	0.01	0.01	0.01	0.01	0.01	0.01	0.01	0.01	0.01	0.01	0.01	0.01	0.01	0.01	0.01	0.01
TPI_GAP_complex [s]	0.135469	0.0576799	0.0686864	0.0887564	0.0691888	0.0466642	0.0805443	0.0314159	0.0592929	0.128661	0.0848416	0.158243	0.141224	0.150466	0.0447819	0.0324695	0.227642	0.156724	0.138925	0.148602	0.184345	0.228785	0.17537	0.114894	0.101698	0.141249	0.0372664	0.0864782	0.131557	0.109935	0.0403817	0.0462402	0.0620838	0.260566	0.16652	0.0963998	0.06919	0.156332	0.196032	0.244282	0.198914	0.0747439	0.174206	0.0563747	0.112216	0.154739	0.0699846	0.0922267	0.182345
DHAP [s]	468.855	1.21706e-11	468.855	468.855	468.855	468.855	468.855	468.855	468.855	468.855	468.855	468.855	468.855	468.855	468.855	468.855	468.855	468.855	468.855	468.855	468.855	468.855	468.855	468.855	468.855	468.855	468.855	468.855	468.855	468.855	468.855	468.855	468.855	468.855	468.855	468.855	468.855	468.855	468.855	468.855	468.855	468.855	468.855	468.855	468.855	468.855	468.855	468.855	468.855
TPI_DHAP_complex [s]	0.0462924	0.020286	0.0244351	0.0700757	0.058457	0.0600973	0.01	0.0808413	0.040095	0.0616773	0.0388573	0.0699768	0.0409362	0.0716412	0.0656557	0.0497019	0.0567335	0.0562163	0.0500442	0.0544277	0.0582743	0.055053	0.022746	0.0648239	0.0427484	0.0769077	0.0332297	0.0358758	0.0314814	0.0455823	0.0390102	0.0619057	0.0696123	0.0838347	0.0822942	0.0184743	0.0156353	0.0405949	0.0977671	0.0790117	0.0614008	0.01	0.0339591	0.0281664	0.035844	0.01	0.0234201	0.0129513	0.0223642
FBA [s]	0.01	1.68352e-16	0.01	0.01	0.01	0.01	0.01	0.01	0.01	0.01	0.01	0.01	0.01	0.01	0.01	0.01	0.01	0.01	0.01	0.01	0.01	0.01	0.01	0.01	0.01	0.01	0.01	0.01	0.01	0.01	0.01	0.01	0.01	0.01	0.01	0.01	0.01	0.01	0.01	0.01	0.01	0.01	0.01	0.01	0.01	0.01	0.01	0.01	0.01
FBA_GAP_DHAP_complex [s]	0.0490224	0.0161575	0.0749635	0.0498534	0.0730571	0.0158513	0.0483459	0.0618307	0.0323271	0.0382122	0.0480154	0.0509044	0.0222523	0.0921875	0.0575394	0.0390205	0.0477039	0.0801388	0.048374	0.0506287	0.0385417	0.0511747	0.0525613	0.0669353	0.0383061	0.0815203	0.0424696	0.0399458	0.0448131	0.0594309	0.0362227	0.0808057	0.0485207	0.0534559	0.0545761	0.0908333	0.028678	0.0314421	0.0499817	0.0509304	0.0597584	0.0668331	0.0886664	0.0275319	0.0250324	0.0638818	0.0547842	0.0813097	0.0605551
FBP [s]	179.696	3.29857e-12	179.696	179.696	179.696	179.696	179.696	179.696	179.696	179.696	179.696	179.696	179.696	179.696	179.696	179.696	179.696	179.696	179.696	179.696	179.696	179.696	179.696	179.696	179.696	179.696	179.696	179.696	179.696	179.696	179.696	179.696	179.696	179.696	179.696	179.696	179.696	179.696	179.696	179.696	179.696	179.696	179.696	179.696	179.696	179.696	179.696	179.696	179.696
FBA_FBP_complex [s]	3.4971	2.60939	8.95245	5.81069	11.0804	0.58162	6.01813	8.13616	2.44115	1.27028	5.69694	2.46448	1.80624	10.9315	6.45967	2.47131	2.02291	8.97933	4.92267	6.21932	2.38898	0.572868	6.9254	0.808809	4.91283	11.2144	4.11793	4.17777	4.70843	6.40194	2.76775	8.89737	2.71261	5.9276	1.71972	10.7657	2.71638	1.6952	2.39854	5.71515	3.82311	1.30959	13.1039	2.43132	0.672759	5.91823	5.4406	7.19319	2.37139
FBPase [s]	0.01	1.68352e-16	0.01	0.01	0.01	0.01	0.01	0.01	0.01	0.01	0.01	0.01	0.01	0.01	0.01	0.01	0.01	0.01	0.01	0.01	0.01	0.01	0.01	0.01	0.01	0.01	0.01	0.01	0.01	0.01	0.01	0.01	0.01	0.01	0.01	0.01	0.01	0.01	0.01	0.01	0.01	0.01	0.01	0.01	0.01	0.01	0.01	0.01	0.01
FBPase_FBP_complex [s]	0.129348	1.15882	0.0752493	0.0584685	0.0306521	0.0699306	0.01	0.0892844	0.0537925	0.0704113	0.063986	0.0132496	0.0381925	0.0536147	0.0465151	0.0619631	0.0630762	0.0222222	0.0389204	0.079351	0.0231328	0.0345164	0.0547817	0.0654726	0.0185181	0.055985	0.07967	0.0129992	0.0467234	0.0181384	0.0490763	0.0561973	0.0268155	0.0824214	0.0753438	0.0438302	0.0111573	0.0543846	0.044909	0.0444733	0.0350994	10.4067	0.0239486	0.0141147	0.0302581	0.0257092	0.0758551	0.059031	0.0830607
F6P [s]	393.709	5.57344e-12	393.709	393.709	393.709	393.709	393.709	393.709	393.709	393.709	393.709	393.709	393.709	393.709	393.709	393.709	393.709	393.709	393.709	393.709	393.709	393.709	393.709	393.709	393.709	393.709	393.709	393.709	393.709	393.709	393.709	393.709	393.709	393.709	393.709	393.709	393.709	393.709	393.709	393.709	393.709	393.709	393.709	393.709	393.709	393.709	393.709	393.709	393.709
TRK [s]	0.01	1.68352e-16	0.01	0.01	0.01	0.01	0.01	0.01	0.01	0.01	0.01	0.01	0.01	0.01	0.01	0.01	0.01	0.01	0.01	0.01	0.01	0.01	0.01	0.01	0.01	0.01	0.01	0.01	0.01	0.01	0.01	0.01	0.01	0.01	0.01	0.01	0.01	0.01	0.01	0.01	0.01	0.01	0.01	0.01	0.01	0.01	0.01	0.01	0.01
TRK_F6P_GAP_complex [s]	0.0461322	0.0167226	0.0190043	0.0162211	0.0295757	0.0743767	0.0171927	0.0190056	0.045581	0.0629509	0.0684227	0.0421064	0.071103	0.0253827	0.0164138	0.0445433	0.0321572	0.0647773	0.0524815	0.0378494	0.0217299	0.0213064	0.0398039	0.048405	0.0471146	0.0679244	0.0417624	0.0258031	0.0490121	0.0203827	0.042905	0.0471203	0.0511163	0.0300662	0.0412433	0.0419624	0.0659907	0.0416765	0.0287623	0.0204646	0.0750392	0.0500357	0.0501473	0.0194448	0.0421217	0.0650484	0.0755135	0.073849	0.0342088
E4P [s]	20.5021	3.55449e-13	20.5021	20.5021	20.5021	20.5021	20.5021	20.5021	20.5021	20.5021	20.5021	20.5021	20.5021	20.5021	20.5021	20.5021	20.5021	20.5021	20.5021	20.5021	20.5021	20.5021	20.5021	20.5021	20.5021	20.5021	20.5021	20.5021	20.5021	20.5021	20.5021	20.5021	20.5021	20.5021	20.5021	20.5021	20.5021	20.5021	20.5021	20.5021	20.5021	20.5021	20.5021	20.5021	20.5021	20.5021	20.5021	20.5021	20.5021
Xu5P [s]	0.373299	0.677079	0.259239	0.110688	0.437932	0.381666	0.217002	0.286649	0.35648	0.473256	0.282517	0.468683	0.478752	0.165341	0.426237	0.449198	0.187451	0.459818	0.217455	0.402794	0.423847	0.112112	0.443621	0.195654	0.372689	0.270578	0.382795	0.121952	0.444817	0.454219	0.146326	0.247189	0.25053	0.466492	0.118653	0.4622	0.412756	0.475546	0.103827	0.403375	0.332292	0.420084	0.151709	0.199095	0.303506	0.322306	0.173214	0.436674	0.41226
TRK_E4P_Xu5P_complex [s]	0.0484592	0.0215312	0.0474118	0.019739	0.0764332	0.0611101	0.0405638	0.0530301	0.0407714	0.0830636	0.0551561	0.095742	0.0947158	0.0265988	0.0842404	0.0858002	0.0195409	0.0515106	0.0392148	0.0625606	0.0822912	0.0149456	0.0691051	0.0351383	0.0425611	0.0546577	0.0499852	0.0125365	0.0554514	0.0865934	0.0222753	0.0338536	0.0273231	0.0788411	0.0154744	0.0660648	0.052724	0.069087	0.013091	0.0755023	0.0617725	0.0493569	0.0223842	0.0346406	0.0333701	0.0517817	0.0346401	0.0811039	0.0709388
SBA [s]	0.01	1.68352e-16	0.01	0.01	0.01	0.01	0.01	0.01	0.01	0.01	0.01	0.01	0.01	0.01	0.01	0.01	0.01	0.01	0.01	0.01	0.01	0.01	0.01	0.01	0.01	0.01	0.01	0.01	0.01	0.01	0.01	0.01	0.01	0.01	0.01	0.01	0.01	0.01	0.01	0.01	0.01	0.01	0.01	0.01	0.01	0.01	0.01	0.01	0.01
SBA_DHAP_E4P_complex [s]	0.0477842	0.0169371	0.0695021	0.0734277	0.0646673	0.0606051	0.0414105	0.0334526	0.0772119	0.0650226	0.0571138	0.0629987	0.0586622	0.0557095	0.0405042	0.0477585	0.0771599	0.0509873	0.0828351	0.0437128	0.0609112	0.0758682	0.0367798	0.0579792	0.0582389	0.0729345	0.0376633	0.0583709	0.0557689	0.0495709	0.0618716	0.0434766	0.0682324	0.0636772	0.0578183	0.0504062	0.0532863	0.0572284	0.0477617	0.0557163	0.0567751	0.0517576	0.0279128	0.0302838	0.0339779	0.0688387	0.0373926	0.029601	0.0554468
SBP [s]	213.061	5.37439e-12	213.061	213.061	213.061	213.061	213.061	213.061	213.061	213.061	213.061	213.061	213.061	213.061	213.061	213.061	213.061	213.061	213.061	213.061	213.061	213.061	213.061	213.061	213.061	213.061	213.061	213.061	213.061	213.061	213.061	213.061	213.061	213.061	213.061	213.061	213.061	213.061	213.061	213.061	213.061	213.061	213.061	213.061	213.061	213.061	213.061	213.061	213.061
SBA_SBP_complex [s]	9.65683	7.14796	22.3156	23.8734	20.3971	18.7851	11.1682	8.01028	25.3751	20.5381	17.3997	19.7349	18.0141	16.8424	10.8086	13.6872	25.3545	14.9685	27.6065	12.0818	18.9065	24.8419	9.33059	17.7431	17.8461	23.6777	9.68122	17.8985	16.866	11.1657	7.76287	11.9881	21.8118	8.00942	17.6792	14.7379	15.8808	17.4451	13.6885	9.02606	8.47029	8.9542	5.81197	6.75282	8.21873	22.0524	9.57377	6.48187	16.7381
SBPase [s]	0.01	1.68352e-16	0.01	0.01	0.01	0.01	0.01	0.01	0.01	0.01	0.01	0.01	0.01	0.01	0.01	0.01	0.01	0.01	0.01	0.01	0.01	0.01	0.01	0.01	0.01	0.01	0.01	0.01	0.01	0.01	0.01	0.01	0.01	0.01	0.01	0.01	0.01	0.01	0.01	0.01	0.01	0.01	0.01	0.01	0.01	0.01	0.01	0.01	0.01
SBPase_SBP_complex [s]	1.63786	1.06635e-14	1.63786	1.63786	1.63786	1.63786	1.63786	1.63786	1.63786	1.63786	1.63786	1.63786	1.63786	1.63786	1.63786	1.63786	1.63786	1.63786	1.63786	1.63786	1.63786	1.63786	1.63786	1.63786	1.63786	1.63786	1.63786	1.63786	1.63786	1.63786	1.63786	1.63786	1.63786	1.63786	1.63786	1.63786	1.63786	1.63786	1.63786	1.63786	1.63786	1.63786	1.63786	1.63786	1.63786	1.63786	1.63786	1.63786	1.63786
S7P [s]	1174.08	2.07014e-11	1174.08	1174.08	1174.08	1174.08	1174.08	1174.08	1174.08	1174.08	1174.08	1174.08	1174.08	1174.08	1174.08	1174.08	1174.08	1174.08	1174.08	1174.08	1174.08	1174.08	1174.08	1174.08	1174.08	1174.08	1174.08	1174.08	1174.08	1174.08	1174.08	1174.08	1174.08	1174.08	1174.08	1174.08	1174.08	1174.08	1174.08	1174.08	1174.08	1174.08	1174.08	1174.08	1174.08	1174.08	1174.08	1174.08	1174.08
TRK_S7P_GAP_complex [s]	0.0469592	0.0166486	0.0388868	0.0727044	0.0370922	0.0203734	0.0605442	0.0311522	0.0557312	0.0219778	0.0242424	0.0546632	0.0352886	0.0224704	0.0474153	0.0210894	0.0478349	0.0409375	0.0798028	0.0521878	0.024833	0.027436	0.035755	0.0408523	0.0425352	0.0650184	0.0770224	0.0224079	0.0327217	0.0357282	0.030531	0.0446715	0.073985	0.0515293	0.083633	0.0290305	0.0189599	0.0755452	0.0393992	0.0594612	0.0505905	0.0769517	0.0445023	0.0397893	0.0330063	0.0249325	0.0221764	0.0468436	0.0481726
R5P [s]	71.1935	1.20853e-12	71.1935	71.1935	71.1935	71.1935	71.1935	71.1935	71.1935	71.1935	71.1935	71.1935	71.1935	71.1935	71.1935	71.1935	71.1935	71.1935	71.1935	71.1935	71.1935	71.1935	71.1935	71.1935	71.1935	71.1935	71.1935	71.1935	71.1935	71.1935	71.1935	71.1935	71.1935	71.1935	71.1935	71.1935	71.1935	71.1935	71.1935	71.1935	71.1935	71.1935	71.1935	71.1935	71.1935	71.1935	71.1935	71.1935	71.1935
TRK_R5P_Xu5P_complex [s]	0.0470987	0.0208989	0.0256202	0.0437203	0.0394098	0.07721	0.0472776	0.0517004	0.01	0.0147742	0.059541	0.0394353	0.0628778	0.0260453	0.0594851	0.0648994	0.0345682	0.0276708	0.0665361	0.0389212	0.0813695	0.0263673	0.0180856	0.0674446	0.0666914	0.0517518	0.048059	0.080334	0.0319598	0.0192559	0.0623432	0.0128211	0.0188382	0.014913	0.027384	0.066551	0.01	0.0622786	0.0206071	0.0461945	0.0398358	0.0636851	0.0541576	0.0725702	0.0416059	0.0291246	0.045817	0.0371935	0.0349059
RPE [s]	0.291987	0.23394	0.312196	0.770172	0.159104	0.252001	0.332878	0.163967	0.22495	0.074996	0.326671	0.143729	0.166215	0.261268	0.172329	0.102654	0.216677	0.199991	0.205055	0.242128	0.165605	0.799005	0.215856	0.283786	0.198754	0.329383	0.179076	0.358598	0.163597	0.191937	0.620026	0.377345	0.18942	0.167095	0.778223	0.21085	0.160934	0.134251	0.831943	0.145258	0.137507	0.140794	0.526091	0.452958	0.24717	0.201498	0.355188	0.21184	0.156584
RPE_Xu5P_complex [s]	0.0498378	0.0140294	0.0661492	0.0461726	0.0661993	0.0862438	0.0663109	0.0422317	0.0674808	0.0325851	0.0631128	0.0610294	0.0473616	0.0368264	0.0439326	0.0278603	0.0314103	0.0617504	0.0417312	0.0655577	0.0379541	0.0623367	0.0512893	0.0447112	0.0476489	0.0506566	0.0542321	0.0285741	0.0422235	0.0453329	0.0573052	0.0602123	0.0289221	0.0554474	0.0481912	0.0544257	0.0601496	0.0403216	0.0610167	0.05194	0.0421161	0.0456179	0.0701506	0.0709383	0.0713232	0.0577739	0.0537011	0.0643381	0.0446659
Ru5P [s]	58.8599	2.22864	59.8842	59.8842	59.8842	59.8842	59.8842	59.8842	59.8842	59.8842	59.8842	59.8842	57.9242	59.8842	59.8842	59.8842	59.8842	59.8842	59.8842	59.8842	59.8842	59.8842	59.8842	59.8842	59.8842	59.8842	59.8842	59.8842	59.8842	59.8842	59.8842	59.8842	59.8842	59.8842	59.8842	59.8842	59.8842	59.8842	58.0332	59.8842	59.8842	56.7358	59.8842	59.8842	59.8842	59.8842	59.8842	59.8842	59.8842
RPE_Ru5P_complex [s]	0.0461656	0.0211422	0.0396159	0.0419966	0.0530895	0.0597105	0.0397776	0.064456	0.0409475	0.0718771	0.0365795	0.0644737	0.0417827	0.0221643	0.0574654	0.0713837	0.0485012	0.0189956	0.0594711	0.0390243	0.0749097	0.0926671	0.0385447	0.058816	0.02365	0.0383225	0.0450115	0.01	0.0322236	0.0153152	0.0137113	0.0793375	0.0736266	0.0289141	0.0594119	0.0511505	0.0654288	0.0696196	0.0344833	0.0254067	0.0184719	0.0190846	0.0436173	0.044405	0.0447899	0.0506862	0.0416452	0.0378048	0.0613436
RPI [s]	0.01	1.68352e-16	0.01	0.01	0.01	0.01	0.01	0.01	0.01	0.01	0.01	0.01	0.01	0.01	0.01	0.01	0.01	0.01	0.01	0.01	0.01	0.01	0.01	0.01	0.01	0.01	0.01	0.01	0.01	0.01	0.01	0.01	0.01	0.01	0.01	0.01	0.01	0.01	0.01	0.01	0.01	0.01	0.01	0.01	0.01	0.01	0.01	0.01	0.01
RPI_R5P_complex [s]	0.112462	0.0524532	0.172621	0.100208	0.0802715	0.0405446	0.105357	0.242075	0.0773836	0.121269	0.139971	0.0472968	0.203413	0.145575	0.178314	0.068257	0.109714	0.133235	0.09878	0.174262	0.137847	0.122121	0.152412	0.0535053	0.0793437	0.107444	0.16448	0.220213	0.23568	0.163079	0.0580606	0.139818	0.131019	0.223669	0.11408	0.0796106	0.122012	0.0819846	0.108851	0.190697	0.0748682	0.0946365	0.170702	0.208346	0.0917117	0.136742	0.0388918	0.057605	0.0622964
RPI_Ru5P_complex [s]	0.0454678	0.0203148	0.046115	0.0396046	0.0173385	0.0340849	0.022976	0.0700072	0.078547	0.0284498	0.0348834	0.01	0.0567076	0.0487955	0.0480734	0.0224368	0.0244748	0.0325663	0.0752794	0.0466796	0.048709	0.0476869	0.0391632	0.0428345	0.0319768	0.0236941	0.0433144	0.0624866	0.0678071	0.0457869	0.0331543	0.0348307	0.0331351	0.0636755	0.0408454	0.0210667	0.0515385	0.0412796	0.0241781	0.0523332	0.0514067	0.0801292	0.0454548	0.0584042	0.0186592	0.0337727	0.0526517	0.015995	0.0637818
PRK [s]	0.0161202	0.0125703	0.0144553	0.0231334	0.010563	0.0161408	0.0134305	0.129344	0.0167228	0.0489218	0.0122644	0.0120703	0.01	0.0194179	0.0220771	0.0110085	0.0131229	0.0361595	0.0147817	0.0117716	0.0125787	0.0137505	0.0235985	0.0147354	0.0126008	0.0185132	0.0318263	0.0123784	0.0105661	0.0134334	0.0245591	0.010534	0.0451811	0.0368326	0.0181274	0.0122366	0.0108581	0.0123893	0.01	0.0160418	0.012338	0.01	0.0279866	0.0102437	0.0167574	0.0137062	0.0177908	0.0101485	0.0185781
PRK_Ru5P_complex [s]	0.0458908	0.00702807	0.0539217	0.0398	0.0398	0.0398	0.0466535	0.0478836	0.0433734	0.0547694	0.04927	0.0398	0.0398	0.0398	0.0458481	0.0398	0.0398	0.0398	0.0398	0.0471937	0.0422478	0.0434948	0.0398	0.05936	0.0398	0.0557319	0.042277	0.0398	0.0398	0.0595663	0.0398	0.055513	0.0525746	0.0398	0.0453275	0.0578204	0.0479461	0.0523362	0.0503396	0.0521501	0.0552273	0.0398	0.0398	0.0399436	0.0398	0.0401102	0.0587618	0.0398	0.0595429
PGI [s]	0.01	1.68352e-16	0.01	0.01	0.01	0.01	0.01	0.01	0.01	0.01	0.01	0.01	0.01	0.01	0.01	0.01	0.01	0.01	0.01	0.01	0.01	0.01	0.01	0.01	0.01	0.01	0.01	0.01	0.01	0.01	0.01	0.01	0.01	0.01	0.01	0.01	0.01	0.01	0.01	0.01	0.01	0.01	0.01	0.01	0.01	0.01	0.01	0.01	0.01
PGI_F6P_complex [s]	0.0477124	0.0189761	0.0333468	0.0274696	0.0150113	0.0435461	0.036976	0.0448182	0.0503339	0.01	0.0464243	0.0473163	0.0134567	0.0617601	0.0521896	0.0706344	0.0353649	0.0594216	0.0597526	0.0197247	0.0337618	0.0343469	0.0393269	0.0363075	0.048936	0.032709	0.0600442	0.0538218	0.0792335	0.01	0.0470393	0.0539258	0.0368627	0.0688337	0.0509438	0.035222	0.0611069	0.0374145	0.0380729	0.0219786	0.0484047	0.0222323	0.079203	0.0892291	0.0216299	0.0230104	0.0377029	0.0633176	0.0345094
G6P [s]	689.529	1.00094e-11	689.529	689.529	689.529	689.529	689.529	689.529	689.529	689.529	689.529	689.529	689.529	689.529	689.529	689.529	689.529	689.529	689.529	689.529	689.529	689.529	689.529	689.529	689.529	689.529	689.529	689.529	689.529	689.529	689.529	689.529	689.529	689.529	689.529	689.529	689.529	689.529	689.529	689.529	689.529	689.529	689.529	689.529	689.529	689.529	689.529	689.529	689.529
PGI_G6P_complex [s]	0.0460197	0.0199386	0.0293933	0.0199301	0.0326887	0.0447129	0.0238225	0.0487324	0.0389699	0.0683088	0.0484208	0.0573807	0.0893234	0.0515463	0.056387	0.064764	0.0160128	0.0156145	0.0205807	0.066089	0.0265783	0.0130972	0.0522339	0.0408035	0.0489947	0.0359815	0.0526381	0.0422265	0.0380647	0.0139328	0.0419352	0.043952	0.0453678	0.0668775	0.0395618	0.0270941	0.0401042	0.0358898	0.0122348	0.0727157	0.0809191	0.046604	0.0791286	0.0652713	0.0852933	0.0218896	0.0285945	0.0416706	0.0353477
PGM [s]	0.01	1.68352e-16	0.01	0.01	0.01	0.01	0.01	0.01	0.01	0.01	0.01	0.01	0.01	0.01	0.01	0.01	0.01	0.01	0.01	0.01	0.01	0.01	0.01	0.01	0.01	0.01	0.01	0.01	0.01	0.01	0.01	0.01	0.01	0.01	0.01	0.01	0.01	0.01	0.01	0.01	0.01	0.01	0.01	0.01	0.01	0.01	0.01	0.01	0.01
PGM_G6P_complex [s]	0.048062	0.0190426	0.0633155	0.052876	0.0467243	0.0312316	0.030198	0.0147339	0.0300798	0.0256165	0.046238	0.0801022	0.0438921	0.05248	0.01	0.0400186	0.0396368	0.0279518	0.0539138	0.0884948	0.0479659	0.0665592	0.0224498	0.0599257	0.0964305	0.0644875	0.0622259	0.0532255	0.0602025	0.0587885	0.0720847	0.0358329	0.0382767	0.0859349	0.0533716	0.0494893	0.0530695	0.0735713	0.0805886	0.0492073	0.0697306	0.0262322	0.0649704	0.0572901	0.0727782	0.0560286	0.0613028	0.0249328	0.01
G1P [s]	48.6353	7.10898e-14	48.6353	48.6353	48.6353	48.6353	48.6353	48.6353	48.6353	48.6353	48.6353	48.6353	48.6353	48.6353	48.6353	48.6353	48.6353	48.6353	48.6353	48.6353	48.6353	48.6353	48.6353	48.6353	48.6353	48.6353	48.6353	48.6353	48.6353	48.6353	48.6353	48.6353	48.6353	48.6353	48.6353	48.6353	48.6353	48.6353	48.6353	48.6353	48.6353	48.6353	48.6353	48.6353	48.6353	48.6353	48.6353	48.6353	48.6353
PGM_G1P_complex [s]	0.0462157	0.0199762	0.0398163	0.0572459	0.0238139	0.0323984	0.0543628	0.0903835	0.0267648	0.0214351	0.0482345	0.0901666	0.0465568	0.04318	0.0802177	0.0444703	0.0356108	0.0236136	0.0604877	0.0108641	0.0117483	0.0531058	0.04826	0.0644217	0.01	0.0297011	0.0595837	0.01	0.0590255	0.0305824	0.0669807	0.0459659	0.0613424	0.0252709	0.0657853	0.0570011	0.0338459	0.0563452	0.0593441	0.0484062	0.0478979	0.056533	0.0740906	0.0549032	0.0653517	0.0435861	0.023746	0.0309588	0.0316157
AGPase [s]	0.0105388	0.00333256	0.01	0.01	0.01	0.01	0.01	0.0412033	0.0153277	0.01	0.01	0.01	0.01	0.01	0.01	0.01	0.01	0.01	0.01	0.01	0.01	0.0114797	0.01	0.01	0.01	0.01	0.01	0.01	0.01	0.01	0.0433169	0.01	0.0485154	0.0450332	0.01	0.01	0.01	0.01	0.01	0.01	0.01	0.0124001	0.01	0.01	0.0154545	0.01	0.01	0.01	0.01
AGPase_ATP_G1P_complex [s]	0.0371565	0.0161764	0.0310748	0.012842	0.0424755	0.0185097	0.045354	0.0162762	0.0317825	0.0104753	0.0550873	0.0260887	0.0337038	0.0165504	0.0307919	0.0347028	0.0308498	0.016467	0.015984	0.054241	0.0387812	0.0307073	0.014072	0.0275457	0.0150763	0.0238329	0.0174191	0.0277632	0.038673	0.0455442	0.0748563	0.0660102	0.0705903	0.0707699	0.0232534	0.0478035	0.0517879	0.0313282	0.0616598	0.0338811	0.0374233	0.0537843	0.0134354	0.0337627	0.0251194	0.0438954	0.0329748	0.0523567	0.0257031
ADPG [s]	13.5889	0.00613535	13.5887	13.5887	13.5887	13.5887	13.5887	13.7259	13.5887	13.5887	13.5887	13.5887	13.5887	13.5887	13.5887	13.5887	13.5887	13.5887	13.5887	13.5887	13.5887	13.5887	13.5887	13.5887	13.5887	13.5887	13.5887	13.5887	13.5887	13.5887	13.5887	13.5887	13.5887	13.5887	13.5887	13.5887	13.5887	13.5887	13.5887	13.5887	13.5887	13.5887	13.5887	13.5887	13.5887	13.5887	13.5887	13.5887	13.5887
AGPase_ADP_ADPG_complex [s]	0.0461359	0.0210175	0.0271214	0.067653	0.0388786	0.0196765	0.010663	0.0621483	0.0712822	0.017558	0.0346727	0.0273083	0.0464421	0.0159836	0.0705529	0.037108	0.0217759	0.0632961	0.0592132	0.0750959	0.0289151	0.0257508	0.0194462	0.0320417	0.0786449	0.0221553	0.0527684	0.0280307	0.0474032	0.0406725	0.0697523	0.0558592	0.0685614	0.0846275	0.061906	0.0254803	0.0721332	0.0301541	0.0404153	0.0378895	0.0453545	0.0811762	0.0342294	0.0591419	0.0368535	0.0557428	0.0684325	0.0307098	0.0265414
RuBP [y]	0.0462891	0.0256877	0.0756894	0.0841809	0.0402551	0.0224747	0.0611673	0.0128812	0.0776213	0.0895134	0.0688138	0.0796371	0.0812162	0.0677571	0.0480356	0.0782333	0.0217979	0.0773429	0.0273182	0.0568024	0.01	0.0552924	0.0817824	0.0211658	0.0554079	0.0248454	0.0883503	0.0188542	0.0813253	0.0902467	0.0189756	0.0407379	0.0826215	0.0150862	0.0680563	0.0636528	0.01	0.0689543	0.0837233	0.0532432	0.0616258	0.0613628	0.0329673	0.0439487	0.0689499	0.0114882	0.0631383	0.0766466	0.01
Rubisco [y]	23.0407	31.5937	11.8057	5.06305	13.5736	12.4599	5.7493	23.5214	12.543	5.70915	13.4753	4.49283	21.7547	5.09346	12.5984	11.8329	15.0111	5.06238	5.72905	2.22161	86.2716	6.54223	5.10725	16.545	5.61869	10.3337	3.67978	7.05021	21.739	8.52507	21.5286	63.1588	9.18631	27.696	3.79419	13.2852	25.4085	8.92812	10.3117	44.2051	6.86797	3.02566	21.3466	11.4249	2.97001	40.1719	2.61431	4.16464	15.189
Rubisco_RuBP_C_complex [y]	1217.04	0.0496501	1217.04	1217.05	1216.96	1217.02	1217.03	1217.03	1217.11	1217.03	1217.07	1217.13	1217.06	1216.99	1217.03	1216.97	1217.03	1216.98	1217.12	1217.05	1217.06	1216.96	1217.02	1216.97	1216.98	1217.02	1216.99	1217.02	1217.13	1217.05	1217.1	1217.13	1217.02	1217.11	1217.11	1217.07	1216.99	1217	1217.12	1217.13	1217.07	1216.96	1217.03	1217.03	1216.97	1216.97	1217	1216.96	1217
3PGA [y]	844.003	5.23221e-12	844.003	844.003	844.003	844.003	844.003	844.003	844.003	844.003	844.003	844.003	844.003	844.003	844.003	844.003	844.003	844.003	844.003	844.003	844.003	844.003	844.003	844.003	844.003	844.003	844.003	844.003	844.003	844.003	844.003	844.003	844.003	844.003	844.003	844.003	844.003	844.003	844.003	844.003	844.003	844.003	844.003	844.003	844.003	844.003	844.003	844.003	844.003
ATP [y]	0	0	0	0	0	0	0	0	0	0	0	0	0	0	0	0	0	0	0	0	0	0	0	0	0	0	0	0	0	0	0	0	0	0	0	0	0	0	0	0	0	0	0	0	0	0	0	0	0
PGK [y]	0	0	0	0	0	0	0	0	0	0	0	0	0	0	0	0	0	0	0	0	0	0	0	0	0	0	0	0	0	0	0	0	0	0	0	0	0	0	0	0	0	0	0	0	0	0	0	0	0
PGK_3PGA_complex [y]	0	0	0	0	0	0	0	0	0	0	0	0	0	0	0	0	0	0	0	0	0	0	0	0	0	0	0	0	0	0	0	0	0	0	0	0	0	0	0	0	0	0	0	0	0	0	0	0	0
BPGA [y]	0	0	0	0	0	0	0	0	0	0	0	0	0	0	0	0	0	0	0	0	0	0	0	0	0	0	0	0	0	0	0	0	0	0	0	0	0	0	0	0	0	0	0	0	0	0	0	0	0
ADP [y]	0	0	0	0	0	0	0	0	0	0	0	0	0	0	0	0	0	0	0	0	0	0	0	0	0	0	0	0	0	0	0	0	0	0	0	0	0	0	0	0	0	0	0	0	0	0	0	0	0
PGK_BPGA_complex [y]	0	0	0	0	0	0	0	0	0	0	0	0	0	0	0	0	0	0	0	0	0	0	0	0	0	0	0	0	0	0	0	0	0	0	0	0	0	0	0	0	0	0	0	0	0	0	0	0	0
NADPH [y]	0	0	0	0	0	0	0	0	0	0	0	0	0	0	0	0	0	0	0	0	0	0	0	0	0	0	0	0	0	0	0	0	0	0	0	0	0	0	0	0	0	0	0	0	0	0	0	0	0
GAPDH [y]	0	0	0	0	0	0	0	0	0	0	0	0	0	0	0	0	0	0	0	0	0	0	0	0	0	0	0	0	0	0	0	0	0	0	0	0	0	0	0	0	0	0	0	0	0	0	0	0	0
GAPDH_BPGA_complex [y]	0	0	0	0	0	0	0	0	0	0	0	0	0	0	0	0	0	0	0	0	0	0	0	0	0	0	0	0	0	0	0	0	0	0	0	0	0	0	0	0	0	0	0	0	0	0	0	0	0
GAP [y]	0	0	0	0	0	0	0	0	0	0	0	0	0	0	0	0	0	0	0	0	0	0	0	0	0	0	0	0	0	0	0	0	0	0	0	0	0	0	0	0	0	0	0	0	0	0	0	0	0
NADP [y]	0	0	0	0	0	0	0	0	0	0	0	0	0	0	0	0	0	0	0	0	0	0	0	0	0	0	0	0	0	0	0	0	0	0	0	0	0	0	0	0	0	0	0	0	0	0	0	0	0
GAPDH_GAP_complex [y]	0	0	0	0	0	0	0	0	0	0	0	0	0	0	0	0	0	0	0	0	0	0	0	0	0	0	0	0	0	0	0	0	0	0	0	0	0	0	0	0	0	0	0	0	0	0	0	0	0
TPI [y]	0	0	0	0	0	0	0	0	0	0	0	0	0	0	0	0	0	0	0	0	0	0	0	0	0	0	0	0	0	0	0	0	0	0	0	0	0	0	0	0	0	0	0	0	0	0	0	0	0
TPI_GAP_complex [y]	0	0	0	0	0	0	0	0	0	0	0	0	0	0	0	0	0	0	0	0	0	0	0	0	0	0	0	0	0	0	0	0	0	0	0	0	0	0	0	0	0	0	0	0	0	0	0	0	0
DHAP [y]	0	0	0	0	0	0	0	0	0	0	0	0	0	0	0	0	0	0	0	0	0	0	0	0	0	0	0	0	0	0	0	0	0	0	0	0	0	0	0	0	0	0	0	0	0	0	0	0	0
TPI_DHAP_complex [y]	0	0	0	0	0	0	0	0	0	0	0	0	0	0	0	0	0	0	0	0	0	0	0	0	0	0	0	0	0	0	0	0	0	0	0	0	0	0	0	0	0	0	0	0	0	0	0	0	0
FBA [y]	0	0	0	0	0	0	0	0	0	0	0	0	0	0	0	0	0	0	0	0	0	0	0	0	0	0	0	0	0	0	0	0	0	0	0	0	0	0	0	0	0	0	0	0	0	0	0	0	0
FBA_GAP_DHAP_complex [y]	0	0	0	0	0	0	0	0	0	0	0	0	0	0	0	0	0	0	0	0	0	0	0	0	0	0	0	0	0	0	0	0	0	0	0	0	0	0	0	0	0	0	0	0	0	0	0	0	0
FBP [y]	0	0	0	0	0	0	0	0	0	0	0	0	0	0	0	0	0	0	0	0	0	0	0	0	0	0	0	0	0	0	0	0	0	0	0	0	0	0	0	0	0	0	0	0	0	0	0	0	0
FBA_FBP_complex [y]	0	0	0	0	0	0	0	0	0	0	0	0	0	0	0	0	0	0	0	0	0	0	0	0	0	0	0	0	0	0	0	0	0	0	0	0	0	0	0	0	0	0	0	0	0	0	0	0	0
FBPase [y]	0	0	0	0	0	0	0	0	0	0	0	0	0	0	0	0	0	0	0	0	0	0	0	0	0	0	0	0	0	0	0	0	0	0	0	0	0	0	0	0	0	0	0	0	0	0	0	0	0
FBPase_FBP_complex [y]	0	0	0	0	0	0	0	0	0	0	0	0	0	0	0	0	0	0	0	0	0	0	0	0	0	0	0	0	0	0	0	0	0	0	0	0	0	0	0	0	0	0	0	0	0	0	0	0	0
F6P [y]	0	0	0	0	0	0	0	0	0	0	0	0	0	0	0	0	0	0	0	0	0	0	0	0	0	0	0	0	0	0	0	0	0	0	0	0	0	0	0	0	0	0	0	0	0	0	0	0	0
TRK [y]	0	0	0	0	0	0	0	0	0	0	0	0	0	0	0	0	0	0	0	0	0	0	0	0	0	0	0	0	0	0	0	0	0	0	0	0	0	0	0	0	0	0	0	0	0	0	0	0	0
TRK_F6P_GAP_complex [y]	0	0	0	0	0	0	0	0	0	0	0	0	0	0	0	0	0	0	0	0	0	0	0	0	0	0	0	0	0	0	0	0	0	0	0	0	0	0	0	0	0	0	0	0	0	0	0	0	0
E4P [y]	0	0	0	0	0	0	0	0	0	0	0	0	0	0	0	0	0	0	0	0	0	0	0	0	0	0	0	0	0	0	0	0	0	0	0	0	0	0	0	0	0	0	0	0	0	0	0	0	0
Xu5P [y]	0	0	0	0	0	0	0	0	0	0	0	0	0	0	0	0	0	0	0	0	0	0	0	0	0	0	0	0	0	0	0	0	0	0	0	0	0	0	0	0	0	0	0	0	0	0	0	0	0
TRK_E4P_Xu5P_complex [y]	0	0	0	0	0	0	0	0	0	0	0	0	0	0	0	0	0	0	0	0	0	0	0	0	0	0	0	0	0	0	0	0	0	0	0	0	0	0	0	0	0	0	0	0	0	0	0	0	0
SBA [y]	0	0	0	0	0	0	0	0	0	0	0	0	0	0	0	0	0	0	0	0	0	0	0	0	0	0	0	0	0	0	0	0	0	0	0	0	0	0	0	0	0	0	0	0	0	0	0	0	0
SBA_DHAP_E4P_complex [y]	0	0	0	0	0	0	0	0	0	0	0	0	0	0	0	0	0	0	0	0	0	0	0	0	0	0	0	0	0	0	0	0	0	0	0	0	0	0	0	0	0	0	0	0	0	0	0	0	0
SBP [y]	0	0	0	0	0	0	0	0	0	0	0	0	0	0	0	0	0	0	0	0	0	0	0	0	0	0	0	0	0	0	0	0	0	0	0	0	0	0	0	0	0	0	0	0	0	0	0	0	0
SBA_SBP_complex [y]	0	0	0	0	0	0	0	0	0	0	0	0	0	0	0	0	0	0	0	0	0	0	0	0	0	0	0	0	0	0	0	0	0	0	0	0	0	0	0	0	0	0	0	0	0	0	0	0	0
SBPase [y]	0	0	0	0	0	0	0	0	0	0	0	0	0	0	0	0	0	0	0	0	0	0	0	0	0	0	0	0	0	0	0	0	0	0	0	0	0	0	0	0	0	0	0	0	0	0	0	0	0
SBPase_SBP_complex [y]	0	0	0	0	0	0	0	0	0	0	0	0	0	0	0	0	0	0	0	0	0	0	0	0	0	0	0	0	0	0	0	0	0	0	0	0	0	0	0	0	0	0	0	0	0	0	0	0	0
S7P [y]	0	0	0	0	0	0	0	0	0	0	0	0	0	0	0	0	0	0	0	0	0	0	0	0	0	0	0	0	0	0	0	0	0	0	0	0	0	0	0	0	0	0	0	0	0	0	0	0	0
TRK_S7P_GAP_complex [y]	0	0	0	0	0	0	0	0	0	0	0	0	0	0	0	0	0	0	0	0	0	0	0	0	0	0	0	0	0	0	0	0	0	0	0	0	0	0	0	0	0	0	0	0	0	0	0	0	0
R5P [y]	0	0	0	0	0	0	0	0	0	0	0	0	0	0	0	0	0	0	0	0	0	0	0	0	0	0	0	0	0	0	0	0	0	0	0	0	0	0	0	0	0	0	0	0	0	0	0	0	0
TRK_R5P_Xu5P_complex [y]	0	0	0	0	0	0	0	0	0	0	0	0	0	0	0	0	0	0	0	0	0	0	0	0	0	0	0	0	0	0	0	0	0	0	0	0	0	0	0	0	0	0	0	0	0	0	0	0	0
RPE [y]	0	0	0	0	0	0	0	0	0	0	0	0	0	0	0	0	0	0	0	0	0	0	0	0	0	0	0	0	0	0	0	0	0	0	0	0	0	0	0	0	0	0	0	0	0	0	0	0	0
RPE_Xu5P_complex [y]	0	0	0	0	0	0	0	0	0	0	0	0	0	0	0	0	0	0	0	0	0	0	0	0	0	0	0	0	0	0	0	0	0	0	0	0	0	0	0	0	0	0	0	0	0	0	0	0	0
Ru5P [y]	0	0	0	0	0	0	0	0	0	0	0	0	0	0	0	0	0	0	0	0	0	0	0	0	0	0	0	0	0	0	0	0	0	0	0	0	0	0	0	0	0	0	0	0	0	0	0	0	0
RPE_Ru5P_complex [y]	0	0	0	0	0	0	0	0	0	0	0	0	0	0	0	0	0	0	0	0	0	0	0	0	0	0	0	0	0	0	0	0	0	0	0	0	0	0	0	0	0	0	0	0	0	0	0	0	0
RPI [y]	0	0	0	0	0	0	0	0	0	0	0	0	0	0	0	0	0	0	0	0	0	0	0	0	0	0	0	0	0	0	0	0	0	0	0	0	0	0	0	0	0	0	0	0	0	0	0	0	0
RPI_R5P_complex [y]	0	0	0	0	0	0	0	0	0	0	0	0	0	0	0	0	0	0	0	0	0	0	0	0	0	0	0	0	0	0	0	0	0	0	0	0	0	0	0	0	0	0	0	0	0	0	0	0	0
RPI_Ru5P_complex [y]	0	0	0	0	0	0	0	0	0	0	0	0	0	0	0	0	0	0	0	0	0	0	0	0	0	0	0	0	0	0	0	0	0	0	0	0	0	0	0	0	0	0	0	0	0	0	0	0	0
PRK [y]	0	0	0	0	0	0	0	0	0	0	0	0	0	0	0	0	0	0	0	0	0	0	0	0	0	0	0	0	0	0	0	0	0	0	0	0	0	0	0	0	0	0	0	0	0	0	0	0	0
PRK_Ru5P_complex [y]	0	0	0	0	0	0	0	0	0	0	0	0	0	0	0	0	0	0	0	0	0	0	0	0	0	0	0	0	0	0	0	0	0	0	0	0	0	0	0	0	0	0	0	0	0	0	0	0	0
PGI [y]	0	0	0	0	0	0	0	0	0	0	0	0	0	0	0	0	0	0	0	0	0	0	0	0	0	0	0	0	0	0	0	0	0	0	0	0	0	0	0	0	0	0	0	0	0	0	0	0	0
PGI_F6P_complex [y]	0	0	0	0	0	0	0	0	0	0	0	0	0	0	0	0	0	0	0	0	0	0	0	0	0	0	0	0	0	0	0	0	0	0	0	0	0	0	0	0	0	0	0	0	0	0	0	0	0
G6P [y]	0	0	0	0	0	0	0	0	0	0	0	0	0	0	0	0	0	0	0	0	0	0	0	0	0	0	0	0	0	0	0	0	0	0	0	0	0	0	0	0	0	0	0	0	0	0	0	0	0
PGI_G6P_complex [y]	0	0	0	0	0	0	0	0	0	0	0	0	0	0	0	0	0	0	0	0	0	0	0	0	0	0	0	0	0	0	0	0	0	0	0	0	0	0	0	0	0	0	0	0	0	0	0	0	0
PGM [y]	0	0	0	0	0	0	0	0	0	0	0	0	0	0	0	0	0	0	0	0	0	0	0	0	0	0	0	0	0	0	0	0	0	0	0	0	0	0	0	0	0	0	0	0	0	0	0	0	0
PGM_G6P_complex [y]	0	0	0	0	0	0	0	0	0	0	0	0	0	0	0	0	0	0	0	0	0	0	0	0	0	0	0	0	0	0	0	0	0	0	0	0	0	0	0	0	0	0	0	0	0	0	0	0	0
G1P [y]	0	0	0	0	0	0	0	0	0	0	0	0	0	0	0	0	0	0	0	0	0	0	0	0	0	0	0	0	0	0	0	0	0	0	0	0	0	0	0	0	0	0	0	0	0	0	0	0	0
PGM_G1P_complex [y]	0	0	0	0	0	0	0	0	0	0	0	0	0	0	0	0	0	0	0	0	0	0	0	0	0	0	0	0	0	0	0	0	0	0	0	0	0	0	0	0	0	0	0	0	0	0	0	0	0
AGPase [y]	0	0	0	0	0	0	0	0	0	0	0	0	0	0	0	0	0	0	0	0	0	0	0	0	0	0	0	0	0	0	0	0	0	0	0	0	0	0	0	0	0	0	0	0	0	0	0	0	0
AGPase_ATP_G1P_complex [y]	0	0	0	0	0	0	0	0	0	0	0	0	0	0	0	0	0	0	0	0	0	0	0	0	0	0	0	0	0	0	0	0	0	0	0	0	0	0	0	0	0	0	0	0	0	0	0	0	0
ADPG [y]	0	0	0	0	0	0	0	0	0	0	0	0	0	0	0	0	0	0	0	0	0	0	0	0	0	0	0	0	0	0	0	0	0	0	0	0	0	0	0	0	0	0	0	0	0	0	0	0	0
AGPase_ADP_ADPG_complex [y]	0	0	0	0	0	0	0	0	0	0	0	0	0	0	0	0	0	0	0	0	0	0	0	0	0	0	0	0	0	0	0	0	0	0	0	0	0	0	0	0	0	0	0	0	0	0	0	0	0
[truncated: 953 more columns]

## Sheet: B_free, bound concentration
Supplementary Table 5B. Concentration [µM] of CBC metabolites seperated into free and enzyme bound metabolite concentration in stroma and pyrenoid, respectively.
	metabolite	average	standard deviation	SAMPLE 1	SAMPLE 2	SAMPLE 3	SAMPLE 4	SAMPLE 5	SAMPLE 6	SAMPLE 7	SAMPLE 8	SAMPLE 9	SAMPLE 10	SAMPLE 11	SAMPLE 12	SAMPLE 13	SAMPLE 14	SAMPLE 15	SAMPLE 16	SAMPLE 17	SAMPLE 18	SAMPLE 19	SAMPLE 20	SAMPLE 21	SAMPLE 22	SAMPLE 23	SAMPLE 24	SAMPLE 25	SAMPLE 26	SAMPLE 27	SAMPLE 28	SAMPLE 29	SAMPLE 30	SAMPLE 31	SAMPLE 32	SAMPLE 33	SAMPLE 34	SAMPLE 35	SAMPLE 36	SAMPLE 37	SAMPLE 38	SAMPLE 39	SAMPLE 40	SAMPLE 41	SAMPLE 42	SAMPLE 43	SAMPLE 44	SAMPLE 45	SAMPLE 46
free stroma	RuBP [s]	0.0544466	0.0264546	0.0843557	0.0928473	0.0489209	0.0311409	0.0698336	0.0215475	0.0862882	0.0981797	0.0774803	0.0883041	0.0898827	0.0764231	0.0567019	0.0868992	0.0304642	0.0860088	0.0359852	0.0654688	0.010247	0.0639582	0.0904487	0.0298316	0.0640739	0.0335117	0.0970163	0.0275204	0.0899923	0.0989131	0.0276424	0.0494049	0.0912877	0.023753	0.0767231	0.0723194	0.0174023	0.0776203	0.0923903	0.0619103	0.0702924	0.0700287	0.0416336	0.052615	0.0776158	0.0201541	0.0718043	0.0853124
	3PGA [s]	844.003	5.23221e-12	844.003	844.003	844.003	844.003	844.003	844.003	844.003	844.003	844.003	844.003	844.003	844.003	844.003	844.003	844.003	844.003	844.003	844.003	844.003	844.003	844.003	844.003	844.003	844.003	844.003	844.003	844.003	844.003	844.003	844.003	844.003	844.003	844.003	844.003	844.003	844.003	844.003	844.003	844.003	844.003	844.003	844.003	844.003	844.003	844.003	844.003
	BPGA [s]	0.911523	1.63284e-14	0.911523	0.911523	0.911523	0.911523	0.911523	0.911523	0.911523	0.911523	0.911523	0.911523	0.911523	0.911523	0.911523	0.911523	0.911523	0.911523	0.911523	0.911523	0.911523	0.911523	0.911523	0.911523	0.911523	0.911523	0.911523	0.911523	0.911523	0.911523	0.911523	0.911523	0.911523	0.911523	0.911523	0.911523	0.911523	0.911523	0.911523	0.911523	0.911523	0.911523	0.911523	0.911523	0.911523	0.911523	0.911523	0.911523
	GAP [s]	21.7204	2.52369e-13	21.7204	21.7204	21.7204	21.7204	21.7204	21.7204	21.7204	21.7204	21.7204	21.7204	21.7204	21.7204	21.7204	21.7204	21.7204	21.7204	21.7204	21.7204	21.7204	21.7204	21.7204	21.7204	21.7204	21.7204	21.7204	21.7204	21.7204	21.7204	21.7204	21.7204	21.7204	21.7204	21.7204	21.7204	21.7204	21.7204	21.7204	21.7204	21.7204	21.7204	21.7204	21.7204	21.7204	21.7204	21.7204	21.7204
	DHAP [s]	468.855	1.21706e-11	468.855	468.855	468.855	468.855	468.855	468.855	468.855	468.855	468.855	468.855	468.855	468.855	468.855	468.855	468.855	468.855	468.855	468.855	468.855	468.855	468.855	468.855	468.855	468.855	468.855	468.855	468.855	468.855	468.855	468.855	468.855	468.855	468.855	468.855	468.855	468.855	468.855	468.855	468.855	468.855	468.855	468.855	468.855	468.855	468.855	468.855
	FBP [s]	179.696	3.29857e-12	179.696	179.696	179.696	179.696	179.696	179.696	179.696	179.696	179.696	179.696	179.696	179.696	179.696	179.696	179.696	179.696	179.696	179.696	179.696	179.696	179.696	179.696	179.696	179.696	179.696	179.696	179.696	179.696	179.696	179.696	179.696	179.696	179.696	179.696	179.696	179.696	179.696	179.696	179.696	179.696	179.696	179.696	179.696	179.696	179.696	179.696
	F6P [s]	393.709	5.57344e-12	393.709	393.709	393.709	393.709	393.709	393.709	393.709	393.709	393.709	393.709	393.709	393.709	393.709	393.709	393.709	393.709	393.709	393.709	393.709	393.709	393.709	393.709	393.709	393.709	393.709	393.709	393.709	393.709	393.709	393.709	393.709	393.709	393.709	393.709	393.709	393.709	393.709	393.709	393.709	393.709	393.709	393.709	393.709	393.709	393.709	393.709
	E4P [s]	20.5021	3.55449e-13	20.5021	20.5021	20.5021	20.5021	20.5021	20.5021	20.5021	20.5021	20.5021	20.5021	20.5021	20.5021	20.5021	20.5021	20.5021	20.5021	20.5021	20.5021	20.5021	20.5021	20.5021	20.5021	20.5021	20.5021	20.5021	20.5021	20.5021	20.5021	20.5021	20.5021	20.5021	20.5021	20.5021	20.5021	20.5021	20.5021	20.5021	20.5021	20.5021	20.5021	20.5021	20.5021	20.5021	20.5021	20.5021	20.5021
	Xu5P [s]	0.373299	0.677079	0.259239	0.110688	0.437932	0.381666	0.217002	0.286649	0.35648	0.473256	0.282517	0.468683	0.478752	0.165341	0.426237	0.449198	0.187451	0.459818	0.217455	0.402794	0.423847	0.112112	0.443621	0.195654	0.372689	0.270578	0.382795	0.121952	0.444817	0.454219	0.146326	0.247189	0.25053	0.466492	0.118653	0.4622	0.412756	0.475546	0.103827	0.403375	0.332292	0.420084	0.151709	0.199095	0.303506	0.322306	0.173214	0.436674
	SBP [s]	213.061	5.37439e-12	213.061	213.061	213.061	213.061	213.061	213.061	213.061	213.061	213.061	213.061	213.061	213.061	213.061	213.061	213.061	213.061	213.061	213.061	213.061	213.061	213.061	213.061	213.061	213.061	213.061	213.061	213.061	213.061	213.061	213.061	213.061	213.061	213.061	213.061	213.061	213.061	213.061	213.061	213.061	213.061	213.061	213.061	213.061	213.061	213.061	213.061
	S7P [s]	1174.08	2.07014e-11	1174.08	1174.08	1174.08	1174.08	1174.08	1174.08	1174.08	1174.08	1174.08	1174.08	1174.08	1174.08	1174.08	1174.08	1174.08	1174.08	1174.08	1174.08	1174.08	1174.08	1174.08	1174.08	1174.08	1174.08	1174.08	1174.08	1174.08	1174.08	1174.08	1174.08	1174.08	1174.08	1174.08	1174.08	1174.08	1174.08	1174.08	1174.08	1174.08	1174.08	1174.08	1174.08	1174.08	1174.08	1174.08	1174.08
	R5P [s]	71.1935	1.20853e-12	71.1935	71.1935	71.1935	71.1935	71.1935	71.1935	71.1935	71.1935	71.1935	71.1935	71.1935	71.1935	71.1935	71.1935	71.1935	71.1935	71.1935	71.1935	71.1935	71.1935	71.1935	71.1935	71.1935	71.1935	71.1935	71.1935	71.1935	71.1935	71.1935	71.1935	71.1935	71.1935	71.1935	71.1935	71.1935	71.1935	71.1935	71.1935	71.1935	71.1935	71.1935	71.1935	71.1935	71.1935	71.1935	71.1935
	Ru5P [s]	58.8599	2.22864	59.8842	59.8842	59.8842	59.8842	59.8842	59.8842	59.8842	59.8842	59.8842	59.8842	57.9242	59.8842	59.8842	59.8842	59.8842	59.8842	59.8842	59.8842	59.8842	59.8842	59.8842	59.8842	59.8842	59.8842	59.8842	59.8842	59.8842	59.8842	59.8842	59.8842	59.8842	59.8842	59.8842	59.8842	59.8842	59.8842	58.0332	59.8842	59.8842	56.7358	59.8842	59.8842	59.8842	59.8842	59.8842	59.8842
	G1P [s]	48.6353	7.10898e-14	48.6353	48.6353	48.6353	48.6353	48.6353	48.6353	48.6353	48.6353	48.6353	48.6353	48.6353	48.6353	48.6353	48.6353	48.6353	48.6353	48.6353	48.6353	48.6353	48.6353	48.6353	48.6353	48.6353	48.6353	48.6353	48.6353	48.6353	48.6353	48.6353	48.6353	48.6353	48.6353	48.6353	48.6353	48.6353	48.6353	48.6353	48.6353	48.6353	48.6353	48.6353	48.6353	48.6353	48.6353	48.6353	48.6353
	G6P [s]	689.529	1.00094e-11	689.529	689.529	689.529	689.529	689.529	689.529	689.529	689.529	689.529	689.529	689.529	689.529	689.529	689.529	689.529	689.529	689.529	689.529	689.529	689.529	689.529	689.529	689.529	689.529	689.529	689.529	689.529	689.529	689.529	689.529	689.529	689.529	689.529	689.529	689.529	689.529	689.529	689.529	689.529	689.529	689.529	689.529	689.529	689.529	689.529	689.529
	ADPG [s]	13.5889	0.00613535	13.5887	13.5887	13.5887	13.5887	13.5887	13.7259	13.5887	13.5887	13.5887	13.5887	13.5887	13.5887	13.5887	13.5887	13.5887	13.5887	13.5887	13.5887	13.5887	13.5887	13.5887	13.5887	13.5887	13.5887	13.5887	13.5887	13.5887	13.5887	13.5887	13.5887	13.5887	13.5887	13.5887	13.5887	13.5887	13.5887	13.5887	13.5887	13.5887	13.5887	13.5887	13.5887	13.5887	13.5887	13.5887	13.5887
	ATP [s]	0.101616	0.0395396	0.108268	0.0365142	0.0990243	0.0661444	0.107492	0.0113203	0.0830543	0.0322802	0.121275	0.0890971	0.097314	0.05521	0.0647833	0.0935227	0.0700919	0.0339311	0.0594242	0.123407	0.108923	0.101155	0.0307095	0.112373	0.0593681	0.0861695	0.0430649	0.0930284	0.11644	0.123521	0.0455729	0.151093	0.0341416	0.0350914	0.0784191	0.133219	0.134946	0.124185	0.155324	0.0957166	0.128615	0.0935356	0.0413209	0.129996	0.0639599	0.0973581	0.0925124	0.126806
	ADP [s]	1.99418	1.26394	0.371282	1.70685	1.38997	0.600242	1.16981	0.14559	0.478913	0.589793	1.8631	0.584897	1.19544	0.131521	0.726612	1.94441	0.22987	0.521078	0.528684	1.97711	1.71009	0.225703	1.5241	0.645416	2.39693	0.9552	0.394827	1.68974	1.43303	0.48147	0.1581	1.78331	0.1194	0.145045	0.542933	0.252713	1.96819	0.797845	2.01925	0.941867	0.448499	0.573476	1.20682	1.27419	0.249432	0.972444	2.22421	0.413729
	NADP [s]	0.0796	5.83159e-16	0.0796	0.0796	0.0796	0.0796	0.0796	0.0796	0.0796	0.0796	0.0796	0.0796	0.0796	0.0796	0.0796	0.0796	0.0796	0.0796	0.0796	0.0796	0.0796	0.0796	0.0796	0.0796	0.0796	0.0796	0.0796	0.0796	0.0796	0.0796	0.0796	0.0796	0.0796	0.0796	0.0796	0.0796	0.0796	0.0796	0.0796	0.0796	0.0796	0.0796	0.0796	0.0796	0.0796	0.0796	0.0796	0.0796
	NADPH [s]	4.38724	2.75114	10.6022	6.53987	1.96712	10.5805	6.27278	3.73066	5.63876	9.19203	1.91252	3.10876	4.71702	4.90007	10.083	1.59346	4.46605	3.70732	2.63073	9.04498	1.93219	3.20852	10.2326	9.61775	9.70839	2.02879	1.66897	1.65887	2.20905	3.84547	1.75662	4.25248	2.32059	8.69633	6.36741	3.87825	2.19477	2.03229	2.83807	2.19812	4.52582	3.81263	9.62626	4.19889	10.3222	1.8749	6.56721	4.61507
	CO2 [s]	0.0536687	0.0261655	0.0306132	0.0524966	0.0438934	0.0936012	0.0484968	0.0910239	0.0330585	0.0537646	0.0255021	0.0724591	0.0179686	0.0884914	0.0481502	0.0231843	0.0791656	0.0635352	0.0869278	0.0843831	0.0213959	0.0566448	0.0498745	0.0874606	0.0748052	0.0695617	0.0622526	0.0775694	0.0221157	0.0382585	0.0707638	0.01	0.0312054	0.0480214	0.0538538	0.0191649	0.0726328	0.0419219	0.0349896	0.0199885	0.0308577	0.0833163	0.0478372	0.0510066	0.089643	0.0638544	0.0843015	0.092485
free pyrenoid	RuBP [y]	0.0462891	0.0256877	0.0756894	0.0841809	0.0402551	0.0224747	0.0611673	0.0128812	0.0776213	0.0895134	0.0688138	0.0796371	0.0812162	0.0677571	0.0480356	0.0782333	0.0217979	0.0773429	0.0273182	0.0568024	0.01	0.0552924	0.0817824	0.0211658	0.0554079	0.0248454	0.0883503	0.0188542	0.0813253	0.0902467	0.0189756	0.0407379	0.0826215	0.0150862	0.0680563	0.0636528	0.01	0.0689543	0.0837233	0.0532432	0.0616258	0.0613628	0.0329673	0.0439487	0.0689499	0.0114882	0.0631383	0.0766466
	3PGA [y]	844.003	5.23221e-12	844.003	844.003	844.003	844.003	844.003	844.003	844.003	844.003	844.003	844.003	844.003	844.003	844.003	844.003	844.003	844.003	844.003	844.003	844.003	844.003	844.003	844.003	844.003	844.003	844.003	844.003	844.003	844.003	844.003	844.003	844.003	844.003	844.003	844.003	844.003	844.003	844.003	844.003	844.003	844.003	844.003	844.003	844.003	844.003	844.003	844.003
	BPGA [y]	0	0	0	0	0	0	0	0	0	0	0	0	0	0	0	0	0	0	0	0	0	0	0	0	0	0	0	0	0	0	0	0	0	0	0	0	0	0	0	0	0	0	0	0	0	0	0	0
	GAP [y]	0	0	0	0	0	0	0	0	0	0	0	0	0	0	0	0	0	0	0	0	0	0	0	0	0	0	0	0	0	0	0	0	0	0	0	0	0	0	0	0	0	0	0	0	0	0	0	0
	DHAP [y]	0	0	0	0	0	0	0	0	0	0	0	0	0	0	0	0	0	0	0	0	0	0	0	0	0	0	0	0	0	0	0	0	0	0	0	0	0	0	0	0	0	0	0	0	0	0	0	0
	FBP [y]	0	0	0	0	0	0	0	0	0	0	0	0	0	0	0	0	0	0	0	0	0	0	0	0	0	0	0	0	0	0	0	0	0	0	0	0	0	0	0	0	0	0	0	0	0	0	0	0
	F6P [y]	0	0	0	0	0	0	0	0	0	0	0	0	0	0	0	0	0	0	0	0	0	0	0	0	0	0	0	0	0	0	0	0	0	0	0	0	0	0	0	0	0	0	0	0	0	0	0	0
	E4P [y]	0	0	0	0	0	0	0	0	0	0	0	0	0	0	0	0	0	0	0	0	0	0	0	0	0	0	0	0	0	0	0	0	0	0	0	0	0	0	0	0	0	0	0	0	0	0	0	0
	Xu5P [y]	0	0	0	0	0	0	0	0	0	0	0	0	0	0	0	0	0	0	0	0	0	0	0	0	0	0	0	0	0	0	0	0	0	0	0	0	0	0	0	0	0	0	0	0	0	0	0	0
	SBP [y]	0	0	0	0	0	0	0	0	0	0	0	0	0	0	0	0	0	0	0	0	0	0	0	0	0	0	0	0	0	0	0	0	0	0	0	0	0	0	0	0	0	0	0	0	0	0	0	0
	S7P [y]	0	0	0	0	0	0	0	0	0	0	0	0	0	0	0	0	0	0	0	0	0	0	0	0	0	0	0	0	0	0	0	0	0	0	0	0	0	0	0	0	0	0	0	0	0	0	0	0
	R5P [y]	0	0	0	0	0	0	0	0	0	0	0	0	0	0	0	0	0	0	0	0	0	0	0	0	0	0	0	0	0	0	0	0	0	0	0	0	0	0	0	0	0	0	0	0	0	0	0	0
	Ru5P [y]	0	0	0	0	0	0	0	0	0	0	0	0	0	0	0	0	0	0	0	0	0	0	0	0	0	0	0	0	0	0	0	0	0	0	0	0	0	0	0	0	0	0	0	0	0	0	0	0
	G1P [y]	0	0	0	0	0	0	0	0	0	0	0	0	0	0	0	0	0	0	0	0	0	0	0	0	0	0	0	0	0	0	0	0	0	0	0	0	0	0	0	0	0	0	0	0	0	0	0	0
	G6P [y]	0	0	0	0	0	0	0	0	0	0	0	0	0	0	0	0	0	0	0	0	0	0	0	0	0	0	0	0	0	0	0	0	0	0	0	0	0	0	0	0	0	0	0	0	0	0	0	0
	ADPG [y]	0	0	0	0	0	0	0	0	0	0	0	0	0	0	0	0	0	0	0	0	0	0	0	0	0	0	0	0	0	0	0	0	0	0	0	0	0	0	0	0	0	0	0	0	0	0	0	0
	ATP [y]	0	0	0	0	0	0	0	0	0	0	0	0	0	0	0	0	0	0	0	0	0	0	0	0	0	0	0	0	0	0	0	0	0	0	0	0	0	0	0	0	0	0	0	0	0	0	0	0
	ADP [y]	0	0	0	0	0	0	0	0	0	0	0	0	0	0	0	0	0	0	0	0	0	0	0	0	0	0	0	0	0	0	0	0	0	0	0	0	0	0	0	0	0	0	0	0	0	0	0	0
	NADP [y]	0	0	0	0	0	0	0	0	0	0	0	0	0	0	0	0	0	0	0	0	0	0	0	0	0	0	0	0	0	0	0	0	0	0	0	0	0	0	0	0	0	0	0	0	0	0	0	0
	NADPH [y]	0	0	0	0	0	0	0	0	0	0	0	0	0	0	0	0	0	0	0	0	0	0	0	0	0	0	0	0	0	0	0	0	0	0	0	0	0	0	0	0	0	0	0	0	0	0	0	0
	CO2 [y]	0.0455192	0.0253925	0.0219468	0.0438302	0.0352276	0.084935	0.0398305	0.0823576	0.0243917	0.0450982	0.0168355	0.0637921	0.01	0.0798254	0.0394839	0.0145184	0.0704993	0.0548692	0.0782608	0.0757167	0.0127294	0.047979	0.0412083	0.0787947	0.0661392	0.0608955	0.0535866	0.0689032	0.0134486	0.029592	0.062097	0.01	0.0225391	0.0393546	0.0451869	0.0104983	0.0639668	0.0332558	0.0263226	0.0113215	0.0221912	0.0746505	0.039171	0.0423402	0.0809771	0.0551886	0.0756355	0.0838192
bound stroma	RuBP [s]	53.6787	0.000609571	53.6787	53.6785	53.6796	53.679	53.6788	53.6788	53.6778	53.6788	53.6783	53.6776	53.6784	53.6792	53.6788	53.6796	53.6788	53.6794	53.6777	53.6785	53.6784	53.6796	53.6789	53.6795	53.6794	53.6789	53.6793	53.679	53.6776	53.6785	53.6779	53.6775	53.679	53.6779	53.6779	53.6783	53.6793	53.6792	53.6776	53.6776	53.6783	53.6796	53.6788	53.6788	53.6796	53.6796	53.6792	53.6796
	3PGA [s]	9.70819	1.03402	9.02208	10.4552	11.1213	9.94533	9.96765	9.93371	9.4628	9.38058	10.5614	11.0622	10.4329	8.46433	9.70153	9.50252	7.30999	8.53333	9.11721	10.841	9.36545	7.02483	10.718	10.044	11.4369	10.1757	9.10047	11.0343	9.32927	9.33905	8.94857	9.01321	9.48136	9.23447	8.83413	8.66227	10.1845	8.92903	7.72117	10.1746	7.02132	11.4778	10.8037	9.80455	8.60387	8.48099	9.90595	7.83682
	BPGA [s]	0.100695	0.00619402	0.0910137	0.0910361	0.0914834	0.0898001	0.0903352	0.0897839	0.0913338	0.0909215	0.0919003	0.090313	0.0905764	0.0924306	0.0918262	0.0912044	0.0901955	0.0915856	0.0913493	0.0917382	0.0910377	0.0899498	0.0908942	0.0914136	0.0935337	0.0914707	0.0907798	0.0932917	0.0927681	0.0926258	0.0904517	0.0937558	0.0933572	0.0898387	0.0919552	0.0943364	0.0935749	0.091602	0.0911432	0.0898037	0.0898362	0.0913201	0.0900228	0.0912026	0.0908004	0.0941548	0.0935081	0.0917357
	GAP [s]	0.326718	0.0711717	0.213863	0.252754	0.291806	0.167266	0.235867	0.190497	0.223277	0.265087	0.321633	0.363719	0.306834	0.322746	0.17615	0.233502	0.393252	0.383399	0.383909	0.299268	0.35992	0.379198	0.31349	0.281087	0.239654	0.446257	0.294727	0.272405	0.335604	0.267307	0.238041	0.258157	0.309675	0.416248	0.369717	0.299293	0.254795	0.38794	0.369726	0.454858	0.41873	0.310505	0.371756	0.187206	0.222377	0.391338	0.243605	0.327262
	DHAP [s]	0.143099	0.031145	0.168901	0.193357	0.196181	0.136554	0.0997564	0.176125	0.149634	0.164912	0.143986	0.18388	0.121851	0.219538	0.163699	0.136481	0.181597	0.187342	0.181253	0.148769	0.157727	0.182096	0.112087	0.189738	0.139293	0.231362	0.113363	0.134192	0.132063	0.154584	0.137104	0.186188	0.186365	0.200968	0.194689	0.159714	0.0975995	0.129265	0.195511	0.185658	0.177934	0.128591	0.150538	0.0859821	0.0948542	0.14272	0.115597	0.123862
	FBP [s]	3.62645	2.86156	9.0277	5.86916	11.111	0.65155	6.02813	8.22545	2.49494	1.3407	5.76093	2.47773	1.84443	10.9851	6.50618	2.53327	2.08598	9.00155	4.96159	6.29867	2.41211	0.607384	6.98018	0.874282	4.93135	11.2704	4.1976	4.19077	4.75516	6.42008	2.81682	8.95357	2.73943	6.01002	1.79507	10.8095	2.72754	1.74958	2.44345	5.75962	3.85821	11.7163	13.1278	2.44544	0.703017	5.94394	5.51646	7.25222
	F6P [s]	0.0938447	0.0260064	0.0523511	0.0436908	0.044587	0.117923	0.0541687	0.0638238	0.0959149	0.0729509	0.114847	0.0894227	0.0845597	0.0871428	0.0686034	0.115178	0.0675222	0.124199	0.112234	0.057574	0.0554917	0.0556533	0.0791308	0.0847125	0.0960506	0.100633	0.101807	0.0796249	0.128246	0.0303827	0.0899443	0.101046	0.0879789	0.0989	0.0921871	0.0771845	0.127098	0.079091	0.0668353	0.0424431	0.123444	0.072268	0.12935	0.108674	0.0637516	0.0880587	0.113216	0.137167
	E4P [s]	0.0962434	0.0282169	0.116914	0.0931667	0.1411	0.121715	0.0819743	0.0864826	0.117983	0.148086	0.11227	0.158741	0.153378	0.0823084	0.124745	0.133559	0.0967008	0.102498	0.12205	0.106273	0.143202	0.0908137	0.105885	0.0931175	0.1008	0.127592	0.0876486	0.0709074	0.11122	0.136164	0.0841469	0.0773303	0.0955555	0.142518	0.0732927	0.116471	0.10601	0.126315	0.0608528	0.131219	0.118548	0.101115	0.0502971	0.0649243	0.067348	0.12062	0.0720327	0.110705
	Xu5P [s]	0.145396	0.0323327	0.139181	0.109632	0.182042	0.224564	0.154152	0.146962	0.118252	0.130423	0.17781	0.196207	0.204955	0.0894705	0.187658	0.17856	0.0855195	0.140932	0.147482	0.167039	0.201615	0.10365	0.13848	0.147294	0.156901	0.157066	0.152276	0.121445	0.129635	0.151182	0.141924	0.106887	0.0750835	0.149202	0.0910496	0.187042	0.122874	0.171687	0.0947148	0.173637	0.143724	0.15866	0.146693	0.178149	0.146299	0.13868	0.134158	0.182635
	SBP [s]	11.2947	7.14796	23.9535	25.5113	22.0349	20.4229	12.8061	9.64814	27.0129	22.1759	19.0375	21.3728	19.6519	18.4803	12.4464	15.3251	26.9923	16.6064	29.2444	13.7197	20.5444	26.4797	10.9685	19.3809	19.484	25.3156	11.3191	19.5364	18.5038	12.8035	9.40073	13.6259	23.4497	9.64728	19.3171	16.3758	17.5187	19.083	15.3264	10.6639	10.1081	10.5921	7.44983	8.39068	9.85659	23.6902	11.2116	8.11973
	S7P [s]	0.0469592	0.0166486	0.0388868	0.0727044	0.0370922	0.0203734	0.0605442	0.0311522	0.0557312	0.0219778	0.0242424	0.0546632	0.0352886	0.0224704	0.0474153	0.0210894	0.0478349	0.0409375	0.0798028	0.0521878	0.024833	0.027436	0.035755	0.0408523	0.0425352	0.0650184	0.0770224	0.0224079	0.0327217	0.0357282	0.030531	0.0446715	0.073985	0.0515293	0.083633	0.0290305	0.0189599	0.0755452	0.0393992	0.0594612	0.0505905	0.0769517	0.0445023	0.0397893	0.0330063	0.0249325	0.0221764	0.0468436
	R5P [s]	0.159561	0.0557996	0.198241	0.143929	0.119681	0.117755	0.152634	0.293776	0.0873836	0.136043	0.199512	0.0867321	0.266291	0.17162	0.237799	0.133156	0.144282	0.160906	0.165316	0.213183	0.219217	0.148488	0.170498	0.12095	0.146035	0.159196	0.212539	0.300547	0.267639	0.182335	0.120404	0.152639	0.149857	0.238582	0.141464	0.146162	0.132012	0.144263	0.129458	0.236892	0.114704	0.158322	0.22486	0.280916	0.133318	0.165867	0.0847088	0.0947985
	Ru5P [s]	0.137524	0.030185	0.139652	0.121401	0.110228	0.133595	0.109407	0.182347	0.162868	0.155096	0.120733	0.114274	0.13829	0.11076	0.151387	0.133621	0.112776	0.0913619	0.174551	0.132898	0.165866	0.183849	0.117508	0.161011	0.0954268	0.117748	0.130603	0.112287	0.139831	0.120668	0.0866656	0.169681	0.159336	0.13239	0.145585	0.130038	0.164913	0.163235	0.109001	0.12989	0.125106	0.139014	0.128872	0.142753	0.103249	0.124569	0.153059	0.0935998
	G1P [s]	0.0833722	0.0250705	0.0708912	0.0700879	0.0662894	0.050908	0.0997168	0.10666	0.0585473	0.0319103	0.103322	0.116255	0.0802606	0.0597304	0.11101	0.0791731	0.0664606	0.0400806	0.0764716	0.0651051	0.0505295	0.0838131	0.0623321	0.0919674	0.0250763	0.0535339	0.0770028	0.0377632	0.0976985	0.0761266	0.141837	0.111976	0.131933	0.0960408	0.0890387	0.104805	0.0856338	0.0876734	0.121004	0.0822873	0.0853212	0.110317	0.087526	0.0886659	0.0904711	0.0874815	0.0567208	0.0833155
	G6P [s]	0.0940817	0.0281284	0.0927089	0.0728061	0.079413	0.0759444	0.0540205	0.0634662	0.0690497	0.0939252	0.0946588	0.137483	0.133216	0.104026	0.066387	0.104783	0.0556496	0.0435663	0.0744945	0.154584	0.0745442	0.0796563	0.0746837	0.100729	0.145425	0.100469	0.114864	0.0954521	0.0982673	0.0727213	0.11402	0.0797849	0.0836446	0.152812	0.0929334	0.0765835	0.0931737	0.109461	0.0928234	0.121923	0.15065	0.0728363	0.144099	0.122561	0.158071	0.0779182	0.0898973	0.0666034
	ADPG [s]	0.0461359	0.0210175	0.0271214	0.067653	0.0388786	0.0196765	0.010663	0.0621483	0.0712822	0.017558	0.0346727	0.0273083	0.0464421	0.0159836	0.0705529	0.037108	0.0217759	0.0632961	0.0592132	0.0750959	0.0289151	0.0257508	0.0194462	0.0320417	0.0786449	0.0221553	0.0527684	0.0280307	0.0474032	0.0406725	0.0697523	0.0558592	0.0685614	0.0846275	0.061906	0.0254803	0.0721332	0.0301541	0.0404153	0.0378895	0.0453545	0.0811762	0.0342294	0.0591419	0.0368535	0.0557428	0.0684325	0.0307098
	ATP [s]	9.79124	1.03308	9.10707	10.5078	11.2036	10.0036	10.0597	9.99787	9.53796	9.44582	10.6657	11.1281	10.5064	8.52068	9.77817	9.57702	7.38064	8.5896	9.17299	10.9425	9.44648	7.09903	10.7718	10.1309	11.4917	10.2553	9.16017	11.1019	9.40774	9.44416	9.06323	9.13473	9.60453	9.34504	8.90271	8.76789	10.2842	9.01269	7.83316	10.2607	7.11397	11.5714	10.857	9.87826	8.66879	8.56499	9.99768	7.92897
	ADP [s]	0.0619671	0.0222279	0.0371214	0.077653	0.0488786	0.0296765	0.020663	0.0721483	0.0812822	0.027558	0.0446727	0.0373083	0.0564421	0.0259836	0.0805529	0.0478082	0.0323182	0.0748288	0.0703328	0.0850959	0.0389151	0.0357508	0.0294462	0.0420417	0.0898718	0.0321553	0.0627684	0.0416239	0.0598697	0.0531684	0.0797523	0.0658592	0.0785614	0.0946275	0.071906	0.037564	0.0855203	0.0401541	0.0517784	0.0478895	0.0553545	0.0911762	0.0442294	0.0706225	0.0468535	0.0657428	0.0791615	0.0407098
	NADP [s]	0.0491354	0.0264885	0.0123219	0.0252188	0.0828919	0.01	0.0292398	0.0470925	0.0303447	0.0132852	0.0961108	0.0578015	0.0369657	0.0322395	0.01	0.0963792	0.037914	0.0408214	0.0643264	0.01	0.0904703	0.0504965	0.01	0.01	0.01	0.0905452	0.096206	0.09777	0.077501	0.0418297	0.0880005	0.0393195	0.0739692	0.0206297	0.0237448	0.0410673	0.0719761	0.082944	0.0555504	0.0797195	0.0344272	0.0419409	0.0142339	0.0440651	0.01	0.082737	0.0211458	0.0330334
	NADPH [s]	0.0848641	0.00403161	0.0810137	0.0810361	0.0814834	0.0798001	0.0803352	0.0797839	0.0813338	0.0809215	0.0819003	0.080313	0.0805764	0.0824306	0.0818262	0.0805042	0.0796532	0.0800529	0.0802298	0.0817382	0.0810377	0.0799498	0.0808942	0.0814136	0.0823069	0.0814707	0.0807798	0.0796985	0.0803016	0.0801299	0.0804517	0.0837558	0.0833572	0.0798387	0.0819552	0.0822528	0.0801878	0.081602	0.07978	0.0798037	0.0798362	0.0813201	0.0800228	0.079722	0.0808004	0.0841548	0.0827791	0.0817357
	CO2 [s]	53.6787	0.000609571	53.6787	53.6785	53.6796	53.679	53.6788	53.6788	53.6778	53.6788	53.6783	53.6776	53.6784	53.6792	53.6788	53.6796	53.6788	53.6794	53.6777	53.6785	53.6784	53.6796	53.6789	53.6795	53.6794	53.6789	53.6793	53.679	53.6776	53.6785	53.6779	53.6775	53.679	53.6779	53.6779	53.6783	53.6793	53.6792	53.6776	53.6776	53.6783	53.6796	53.6788	53.6788	53.6796	53.6796	53.6792	53.6796
bound pyrenoid	RuBP [y]	1217.04	0.0496501	1217.04	1217.05	1216.96	1217.02	1217.03	1217.03	1217.11	1217.03	1217.07	1217.13	1217.06	1216.99	1217.03	1216.97	1217.03	1216.98	1217.12	1217.05	1217.06	1216.96	1217.02	1216.97	1216.98	1217.02	1216.99	1217.02	1217.13	1217.05	1217.1	1217.13	1217.02	1217.11	1217.11	1217.07	1216.99	1217	1217.12	1217.13	1217.07	1216.96	1217.03	1217.03	1216.97	1216.97	1217	1216.96
	3PGA [y]	0	0	0	0	0	0	0	0	0	0	0	0	0	0	0	0	0	0	0	0	0	0	0	0	0	0	0	0	0	0	0	0	0	0	0	0	0	0	0	0	0	0	0	0	0	0	0	0
	BPGA [y]	0	0	0	0	0	0	0	0	0	0	0	0	0	0	0	0	0	0	0	0	0	0	0	0	0	0	0	0	0	0	0	0	0	0	0	0	0	0	0	0	0	0	0	0	0	0	0	0
	GAP [y]	0	0	0	0	0	0	0	0	0	0	0	0	0	0	0	0	0	0	0	0	0	0	0	0	0	0	0	0	0	0	0	0	0	0	0	0	0	0	0	0	0	0	0	0	0	0	0	0
	DHAP [y]	0	0	0	0	0	0	0	0	0	0	0	0	0	0	0	0	0	0	0	0	0	0	0	0	0	0	0	0	0	0	0	0	0	0	0	0	0	0	0	0	0	0	0	0	0	0	0	0
	FBP [y]	0	0	0	0	0	0	0	0	0	0	0	0	0	0	0	0	0	0	0	0	0	0	0	0	0	0	0	0	0	0	0	0	0	0	0	0	0	0	0	0	0	0	0	0	0	0	0	0
	F6P [y]	0	0	0	0	0	0	0	0	0	0	0	0	0	0	0	0	0	0	0	0	0	0	0	0	0	0	0	0	0	0	0	0	0	0	0	0	0	0	0	0	0	0	0	0	0	0	0	0
	E4P [y]	0	0	0	0	0	0	0	0	0	0	0	0	0	0	0	0	0	0	0	0	0	0	0	0	0	0	0	0	0	0	0	0	0	0	0	0	0	0	0	0	0	0	0	0	0	0	0	0
	Xu5P [y]	0	0	0	0	0	0	0	0	0	0	0	0	0	0	0	0	0	0	0	0	0	0	0	0	0	0	0	0	0	0	0	0	0	0	0	0	0	0	0	0	0	0	0	0	0	0	0	0
	SBP [y]	0	0	0	0	0	0	0	0	0	0	0	0	0	0	0	0	0	0	0	0	0	0	0	0	0	0	0	0	0	0	0	0	0	0	0	0	0	0	0	0	0	0	0	0	0	0	0	0
	S7P [y]	0	0	0	0	0	0	0	0	0	0	0	0	0	0	0	0	0	0	0	0	0	0	0	0	0	0	0	0	0	0	0	0	0	0	0	0	0	0	0	0	0	0	0	0	0	0	0	0
	R5P [y]	0	0	0	0	0	0	0	0	0	0	0	0	0	0	0	0	0	0	0	0	0	0	0	0	0	0	0	0	0	0	0	0	0	0	0	0	0	0	0	0	0	0	0	0	0	0	0	0
	Ru5P [y]	0	0	0	0	0	0	0	0	0	0	0	0	0	0	0	0	0	0	0	0	0	0	0	0	0	0	0	0	0	0	0	0	0	0	0	0	0	0	0	0	0	0	0	0	0	0	0	0
	G1P [y]	0	0	0	0	0	0	0	0	0	0	0	0	0	0	0	0	0	0	0	0	0	0	0	0	0	0	0	0	0	0	0	0	0	0	0	0	0	0	0	0	0	0	0	0	0	0	0	0
	G6P [y]	0	0	0	0	0	0	0	0	0	0	0	0	0	0	0	0	0	0	0	0	0	0	0	0	0	0	0	0	0	0	0	0	0	0	0	0	0	0	0	0	0	0	0	0	0	0	0	0
	ADPG [y]	0	0	0	0	0	0	0	0	0	0	0	0	0	0	0	0	0	0	0	0	0	0	0	0	0	0	0	0	0	0	0	0	0	0	0	0	0	0	0	0	0	0	0	0	0	0	0	0
	ATP [y]	0	0	0	0	0	0	0	0	0	0	0	0	0	0	0	0	0	0	0	0	0	0	0	0	0	0	0	0	0	0	0	0	0	0	0	0	0	0	0	0	0	0	0	0	0	0	0	0
	ADP [y]	0	0	0	0	0	0	0	0	0	0	0	0	0	0	0	0	0	0	0	0	0	0	0	0	0	0	0	0	0	0	0	0	0	0	0	0	0	0	0	0	0	0	0	0	0	0	0	0
	NADP [y]	0	0	0	0	0	0	0	0	0	0	0	0	0	0	0	0	0	0	0	0	0	0	0	0	0	0	0	0	0	0	0	0	0	0	0	0	0	0	0	0	0	0	0	0	0	0	0	0
	NADPH [y]	0	0	0	0	0	0	0	0	0	0	0	0	0	0	0	0	0	0	0	0	0	0	0	0	0	0	0	0	0	0	0	0	0	0	0	0	0	0	0	0	0	0	0	0	0	0	0	0
	CO2 [y]	1217.04	0.0496501	1217.04	1217.05	1216.96	1217.02	1217.03	1217.03	1217.11	1217.03	1217.07	1217.13	1217.06	1216.99	1217.03	1216.97	1217.03	1216.98	1217.12	1217.05	1217.06	1216.96	1217.02	1216.97	1216.98	1217.02	1216.99	1217.02	1217.13	1217.05	1217.1	1217.13	1217.02	1217.11	1217.11	1217.07	1216.99	1217	1217.12	1217.13	1217.07	1216.96	1217.03	1217.03	1216.97	1216.97	1217	1216.96
[truncated: 954 more columns]

## Sheet: C_flux
Supplementary Table 5C. Reaction flux in µM/s for 1,000 sampled flux distributions. For further information on reaction names see Supplementary file 3.
reaction	average	standard deviation	SAMPLE 1	SAMPLE 2	SAMPLE 3	SAMPLE 4	SAMPLE 5	SAMPLE 6	SAMPLE 7	SAMPLE 8	SAMPLE 9	SAMPLE 10	SAMPLE 11	SAMPLE 12	SAMPLE 13	SAMPLE 14	SAMPLE 15	SAMPLE 16	SAMPLE 17	SAMPLE 18	SAMPLE 19	SAMPLE 20	SAMPLE 21	SAMPLE 22	SAMPLE 23	SAMPLE 24	SAMPLE 25	SAMPLE 26	SAMPLE 27	SAMPLE 28	SAMPLE 29	SAMPLE 30	SAMPLE 31	SAMPLE 32	SAMPLE 33	SAMPLE 34	SAMPLE 35	SAMPLE 36	SAMPLE 37	SAMPLE 38	SAMPLE 39	SAMPLE 40	SAMPLE 41	SAMPLE 42	SAMPLE 43	SAMPLE 44	SAMPLE 45	SAMPLE 46	SAMPLE 47
Diffusion CO2 c-s	398	0	398	398	398	398	398	398	398	398	398	398	398	398	398	398	398	398	398	398	398	398	398	398	398	398	398	398	398	398	398	398	398	398	398	398	398	398	398	398	398	398	398	398	398	398	398	398	398
Diffusion CO2 c-s_rev	0	0	0	0	0	0	0	0	0	0	0	0	0	0	0	0	0	0	0	0	0	0	0	0	0	0	0	0	0	0	0	0	0	0	0	0	0	0	0	0	0	0	0	0	0	0	0	0	0
Diffusion CO2 s-y	536.594	261.812	306.132	524.966	438.934	936.012	484.968	910.239	330.585	537.646	255.021	724.591	179.686	884.914	481.502	231.843	791.656	635.352	869.278	843.831	213.959	566.448	498.745	874.606	748.052	695.617	622.526	775.694	221.157	382.585	707.638	92.7906	312.054	480.214	538.538	191.649	726.328	419.219	349.896	199.885	308.577	833.163	478.372	510.066	896.43	638.544	843.015	924.85	988.416
Diffusion CO2 s-y_rev	449.93	261.812	219.468	438.302	352.276	849.35	398.305	823.576	243.917	450.982	168.355	637.921	93.0208	798.254	394.839	145.184	704.993	548.692	782.608	757.167	127.294	479.79	412.083	787.947	661.392	608.955	535.866	689.032	134.486	295.92	620.97	6.12028	225.391	393.546	451.869	104.983	639.668	332.558	263.226	113.215	221.912	746.505	391.71	423.402	809.771	551.886	756.355	838.192	901.755
Rubisco carboxylase 1 s	662.12	197.992	704.518	671.1	691.555	854.469	503.21	896.439	853.071	827.969	560.812	819.886	634.715	989.743	858.414	482.867	828.72	771.834	439.982	343.251	394.511	623.548	618.345	991.344	739.751	561.678	625.897	329.044	854.074	817.885	911.27	924.235	614.575	590.685	419.144	318.922	583.915	735.53	816.323	957.18	337.405	497.949	990.32	763.74	595.771	915.062	448.526	961.263	492.071
Rubisco carboxylase 1 s_rev	350.784	197.992	393.182	359.764	380.213	543.131	191.873	585.102	541.74	516.633	249.478	508.556	323.38	678.403	547.077	171.526	517.383	460.493	128.652	31.9157	83.1764	312.206	307.008	680.002	428.41	250.341	314.557	17.706	542.744	506.549	599.938	612.905	303.237	279.353	107.812	7.5878	272.575	424.191	504.993	645.85	26.0705	186.608	678.983	452.403	284.43	603.72	137.187	649.921	180.732
Rubisco carboxylase 2 s	311.336	0.00353551	311.336	311.336	311.342	311.338	311.337	311.337	311.331	311.337	311.334	311.33	311.335	311.34	311.337	311.342	311.337	311.341	311.331	311.335	311.335	311.342	311.337	311.341	311.341	311.337	311.34	311.338	311.33	311.336	311.332	311.33	311.338	311.332	311.332	311.334	311.34	311.339	311.33	311.33	311.334	311.342	311.337	311.337	311.341	311.341	311.339	311.342	311.339
Phosphoglycerate kinase 1 s	910.362	72.3933	931.571	892.814	985.37	914.063	857.201	955.437	884.424	979.125	918.308	957.247	939.925	733.065	992.303	868.588	733.104	827.378	836.997	932.145	890.161	638.593	922.163	900.552	971.628	931.177	807.965	988.181	948.8	808.763	879.85	956.682	881.476	786.367	839.578	794.025	973.456	927.126	926.608	960.355	603.626	998.582	977.433	982.031	977.966	918.703	925.419	839.884	926.329
Phosphoglycerate kinase 1 s_rev	88.0786	71.0143	167.401	7.25972	43.3974	71.6936	12.9408	114.052	82.9253	184.591	23.7602	20.2803	56.2555	16.1359	170.584	63.7246	113.948	104.605	64.7697	13.9108	96.9069	43.5901	14.3512	49.8296	2.92628	69.2924	37.1546	53.5742	158.611	17.7454	121.906	193.263	78.4048	4.20742	91.3267	60.3307	110.828	170.837	272.625	98.5634	8.92072	26.4134	62.3566	151.586	249.218	200.363	86.3859	176.106	59.3232
Phosphoglycerate kinase 2 s	822.284	87.5813	764.17	885.554	941.973	842.37	844.26	841.385	801.499	794.535	894.548	936.967	883.67	716.929	821.72	804.863	619.157	722.773	772.227	918.234	793.254	595.003	907.812	850.723	968.701	861.884	770.81	934.607	790.189	791.018	757.944	763.419	803.072	782.16	748.251	733.694	862.628	756.289	653.983	861.792	594.706	972.169	915.077	830.445	728.748	718.34	839.034	663.778	867.006
Phosphoglycerate kinase 3 s	203.679	104.884	33.8432	155.584	126.699	54.7134	106.631	13.2708	43.6541	53.761	169.825	53.3147	108.967	16.0665	135.265	177.237	142.474	131.655	120.984	180.218	155.878	20.5733	138.926	58.8311	218.486	87.0687	71.239	154.024	130.624	168.693	14.4112	162.553	7.60473	13.2212	143.328	139.81	179.405	72.7254	184.059	85.8533	86.05	52.2736	110.005	116.145	22.7363	88.6405	202.742	93.8556	91.0445
Phosphoglycerate kinase 3 s_rev	128.842	82.4327	26.1386	76.9565	97.5049	20.0117	95.7479	7.02735	5.00432	13.4123	91.2427	12.9916	47.9436	11.0094	83.4671	70.2358	105.423	115.327	111.195	85.5092	59.963	9.07229	80.8553	49.0683	112.268	61.978	70.0064	18.0916	124.665	124.959	1.42675	93.6235	2.38559	7.49886	77.2568	120.836	133.871	48.7022	113.632	12.051	69.017	4.40052	82.1301	114.805	15.7242	41.8757	95.4523	9.60782	28.4213
Phosphoglycerate kinase 4 s	74.8371	59.2728	7.70459	78.6272	29.1941	34.7018	10.8829	6.24348	38.6497	40.3487	78.5827	40.3231	61.0235	5.05709	51.7982	107.002	37.051	16.3285	9.78862	94.7086	95.9152	11.501	58.0703	9.76281	106.218	25.0907	1.23264	135.932	5.95949	43.7345	12.9844	68.9293	5.21914	5.72229	66.0713	18.9736	45.5341	24.0232	70.4275	73.8023	17.0329	47.8731	27.8745	1.33967	7.01205	46.7648	107.29	84.2477	62.6232
Glyceraldehyde-3-phosphate dehydrogenase 1 s	924.02	50.4377	966.412	919.033	879.197	964.433	991.3	929.858	953.638	837.875	992.283	959.039	943.573	905.993	919.086	817.27	893.959	806.728	900.912	824.471	936.243	860.102	932.729	876.68	884.942	988.486	856.898	855.934	910.776	858.791	822.87	974.699	950.941	956.779	876.171	893.929	839.647	910.155	833.876	926.21	827.094	877.616	877.456	978.174	940.891	862.853	842.205	855.707	944.873
Glyceraldehyde-3-phosphate dehydrogenase 1 s_rev	75.3789	49.3243	156.275	108.672	64.3633	166.432	187.948	132.018	140.3	28.6602	173.28	155.91	137.809	81.6871	100.824	12.2277	97.4269	6.19863	98.614	7.08868	125.866	60.6037	123.786	62.5437	61.8729	173.78	49.0999	58.9486	107.76	57.492	18.3531	137.142	117.369	158.392	56.6195	71.4016	37.7691	94.1355	36.076	128.173	28.7315	64.4155	77.2279	180.954	132.888	21.3052	14.4137	38.3499	112.996
Glyceraldehyde-3-phosphate dehydrogenase 2 s	848.641	40.3161	810.137	810.361	814.834	798.001	803.352	797.839	813.338	809.215	819.003	803.13	805.764	824.306	818.262	805.042	796.532	800.529	802.298	817.382	810.377	799.498	808.942	814.136	823.069	814.707	807.798	796.985	803.016	801.299	804.517	837.558	833.572	798.387	819.552	822.528	801.878	816.02	797.8	798.037	798.362	813.201	800.228	797.22	808.004	841.548	827.791	817.357	831.877
Glyceraldehyde-3-phosphate dehydrogenase 3 s	538.029	273.424	137.356	266.548	847.753	55.4764	299.75	472.764	320.785	146.067	984.111	585.145	379.421	350.7	87.4711	972.834	379.672	412.744	649.562	43.4225	919.08	508.463	14.0408	68.5486	108.557	924.159	973.858	978.685	782.025	423.596	888.522	434.752	777.264	208.684	261	437.201	725.639	849.46	557.304	799.232	346.634	436.61	146.566	441.871	91.8286	872.917	243.249	351.691	265.522
Glyceraldehyde-3-phosphate dehydrogenase 3 s_rev	485.388	274.081	123.219	252.188	828.919	53.4756	292.398	470.925	303.447	132.852	961.108	578.015	369.657	322.395	65.2095	963.792	379.14	408.214	643.264	22.0404	904.703	504.965	1.09864	50.4127	81.4881	905.452	962.06	977.7	775.01	418.297	880.005	393.195	739.692	206.297	237.448	410.673	719.761	829.44	555.504	797.195	344.272	419.409	142.339	440.651	79.8249	827.37	211.458	330.334	229.645
Glyceraldehyde-3-phosphate dehydrogenase 4 s	52.6406	40.3161	14.137	14.3609	18.834	2.00077	7.35194	1.83945	17.3381	13.2147	23.0031	7.12967	9.76406	28.3056	22.2616	9.04195	0.531813	4.52936	6.29802	21.3821	14.3767	3.49834	12.9422	18.1359	27.0688	18.7068	11.7978	0.985373	7.01584	5.29946	8.51703	41.5578	37.5717	2.38699	23.5518	26.5278	5.87814	20.0199	1.7999	2.03675	2.36208	17.2005	4.2278	1.22022	12.0038	45.5479	31.7912	21.3573	35.8768
Triosephosphate isomerase 1 s	705.362	209.159	751.912	998.75	771.865	504.499	894.185	248.308	714.351	667.244	796.536	702.779	962.007	585.714	207.668	327.294	828.893	689.717	567.613	958.588	904.984	960.978	937.263	614.335	354.391	686.525	473.847	601.6	839.71	458.408	304.964	297.946	489.004	967.18	794.226	551.979	682.6	570.554	873.08	917.727	708.28	883.504	847.997	342.353	932.996	879.182	711.196	565.37	971.428
Triosephosphate isomerase 1 s_rev	248.562	165.879	520.302	699.464	538.56	347.147	622.59	142.374	514.415	233.398	510.45	169.183	485.799	78.3431	56.663	217.807	61.2832	161.242	99.1588	457.502	283.372	189.516	345.917	226.911	11.4652	210.234	348.184	309.996	396.101	87.7072	168.797	142.024	279.657	88.5505	232.72	226.919	449.291	43.4026	212.059	94.0073	37.5411	631.467	260.574	152.258	554.603	357.403	475.208	254.382	356.561
Triosephosphate isomerase 2 s	456.8	194.497	231.611	299.287	233.304	157.352	271.595	105.934	199.936	433.846	286.086	533.597	476.208	507.371	151.005	109.487	767.61	528.475	468.454	501.085	621.612	771.462	591.346	387.424	342.926	476.291	125.662	291.605	443.609	370.701	136.167	155.922	209.347	878.63	561.506	325.06	233.309	527.152	661.021	823.72	670.739	252.037	587.423	190.095	378.393	521.779	235.988	310.988	614.867
Triosephosphate isomerase 3 s	619.059	247.171	358.609	701.21	845.223	887.608	176.597	936.066	734.559	992.096	526.193	923.61	723.667	839.301	996.605	919.136	866.116	794.845	832.712	759.169	991.789	910.543	342.508	890.685	493.78	842.121	502.906	359.893	484.092	718.677	710.365	795.949	786.084	917.159	861.748	184.819	195.841	419.842	986.123	917.041	864.791	88.4677	644.244	537.421	462.042	133.211	398.033	146.781	302.82
Triosephosphate isomerase 3 s_rev	367.117	240.056	244.351	700.757	584.57	600.973	93.9906	808.413	400.95	616.773	388.573	223.842	409.362	716.412	656.557	422.116	298.781	232.682	500.442	214.892	582.743	360.012	227.46	648.239	66.2953	769.077	332.297	358.758	169.278	455.823	390.102	619.057	696.123	78.8119	822.942	0.0759063	156.353	405.949	8.45178	126.924	614.008	54.8984	304.653	281.664	103.603	41.9397	234.201	129.513	79.1788
Triosephosphate isomerase 4 s	251.942	193.138	114.258	0.453349	260.653	286.635	82.6068	127.652	333.609	375.323	137.62	699.768	314.305	122.89	340.048	497.019	567.335	562.163	332.271	544.277	409.046	550.53	115.048	242.446	427.484	73.0446	170.61	1.13532	314.814	262.854	320.262	176.892	89.9615	838.347	38.8054	184.743	39.4884	13.8938	977.671	790.117	250.782	33.5693	339.591	255.756	358.44	91.2715	163.831	17.2678	223.642
Aldolase 1a s	696.936	199.974	854.534	995.062	735.505	302.635	842.964	701.399	492.318	638.536	676.763	700.026	346.649	979.983	625.604	478.653	713.196	936.885	670.185	916.929	493.096	893.861	681.77	809.228	592.434	820.726	501.643	499.657	456.888	912.982	495.487	850.172	790.985	894.084	903.17	933.683	297.5	620.162	872.433	578.033	858.538	757.17	928.166	531.7	437.72	799.214	906.042	855.347	882.789
Aldolase 1a s_rev	290.153	200.94	104.899	498.534	4.93464	144.122	359.505	83.0915	169.047	382.122	196.609	509.044	124.126	58.1079	50.21	88.4485	236.158	135.496	186.445	410.641	107.679	511.747	156.156	669.353	209.373	5.52299	76.9469	100.199	8.75731	318.673	133.26	42.1144	485.207	359.525	545.761	25.3497	10.7201	314.421	372.616	68.7288	260.954	668.331	41.5021	275.319	187.396	160.396	358.2	42.2501	605.551
Aldolase 2a s	406.783	181.315	749.635	496.529	730.571	158.513	483.459	618.307	323.271	256.414	480.154	190.982	222.523	921.875	575.394	390.205	477.039	801.388	483.74	506.287	385.417	382.114	525.613	139.875	383.061	815.203	424.696	399.458	448.131	594.309	362.227	808.057	305.778	534.559	357.409	908.333	286.78	305.742	499.817	509.304	597.584	88.8393	886.664	256.381	250.324	638.818	547.842	813.097	277.238
Aldolase 3a s	605	237.386	794.31	975.564	997.389	149.139	689.778	808.864	485.053	718.48	487.926	909.83	412.491	846.46	887.289	475.549	153.574	987.179	390.731	531.081	361.536	968.521	454.493	100.722	871.99	961.147	928.552	657.928	319.087	579.391	385.594	648.911	809.942	799.255	695.695	862.006	210.861	664.483	583.15	488.25	680.657	115.449	890.121	730.921	63.0242	606.623	834.803	818.276	595.916
Aldolase 3a s_rev	379.437	238.642	216.877	600.775	282.706	111.624	301.609	284.081	327.599	636.547	120.473	750.871	295.989	141.38	470.64	316.15	23.0964	408.012	73.2187	129.935	207.447	931.571	7.80502	48.5535	555.112	237.816	662.945	388.462	15.3928	166.466	207.074	75.031	634.978	416.926	584.773	167.619	35.6546	555.143	428.444	119.623	434.066	30.9803	44.9216	574.101	19.6313	224.897	483.884	354.316	442.962
Aldolase 4a s	225.563	168.306	577.433	374.789	714.683	37.5145	388.169	524.782	157.454	81.9334	367.453	158.959	116.503	705.08	416.649	159.399	130.477	579.167	317.512	401.146	154.089	36.95	446.688	52.1682	316.878	723.33	265.607	269.466	303.694	412.925	178.52	573.88	174.964	382.33	110.922	694.387	175.206	109.34	154.706	368.627	246.59	84.4685	845.2	156.82	43.393	381.726	350.919	463.961	152.954
Fructose-1,6-bisphosphatase 1 s	589.658	241.271	924.695	706.424	322.409	820.305	126.973	986.369	703.743	878.594	752.562	164.519	487.945	752.942	623.896	850.436	977.323	227.162	555.431	898.651	425.387	463.093	626.742	742.433	251.364	651.723	955.79	203.962	611.671	319.99	674.471	796.15	398.969	976.443	999.925	652.248	143.494	740.247	794.201	585.41	629.214	181.819	280.951	240.708	509.512	482.755	955.474	939.446	954.891
Fructose-1,6-bisphosphatase 1 s_rev	408.438	238.676	752.493	584.685	306.521	699.306	31.6833	892.844	537.925	704.113	639.86	132.496	381.925	536.147	465.151	619.631	630.762	4.94	389.204	793.51	194.059	117.928	547.817	654.726	185.181	559.85	796.7	73.9694	467.234	138.606	490.763	561.973	268.155	824.214	753.438	438.302	31.9212	543.846	449.09	444.733	278.22	177.448	239.486	141.147	302.581	225.663	758.551	590.31	830.607
Fructose-1,6-bisphosphatase 2 s	181.22	86.4976	172.201	121.739	15.8878	120.999	95.2895	93.5248	165.817	174.481	112.701	32.0229	106.02	216.795	158.745	230.805	346.561	222.222	166.228	105.141	231.328	345.164	78.925	87.7068	66.1829	91.8731	159.089	129.992	144.437	181.384	183.707	234.177	130.814	152.229	246.487	213.946	111.573	196.401	345.111	140.677	350.994	4.37082	41.4646	99.561	206.931	257.092	196.923	349.136	124.284
Transketolase 1a s	663.999	211.818	211.857	314.682	561.944	897.467	195.812	274.777	710.002	901.813	897.48	557.21	878.081	459.488	272.446	641.047	437.087	855.843	559.219	711.367	396.028	377.895	749.171	731.175	614.718	733.745	436.502	357.31	604.047	401.803	784.47	831.434	884.236	509.175	699.843	833.143	892.48	677.272	502.246	210.04	933.326	864.302	721.332	302.197	452.151	948.408	896.525	955.391	610.585
Transketolase 1a s_rev	311.036	206.428	21.8138	152.471	295.757	153.7	23.8848	84.7207	254.192	629.509	213.252	421.064	711.03	253.827	108.308	445.433	115.515	208.071	34.4043	378.494	217.299	164.831	398.039	247.125	143.572	54.5014	18.8782	99.2788	113.926	203.827	429.05	360.231	511.163	208.512	412.433	413.519	232.573	260.507	287.623	5.39446	182.934	363.945	501.473	107.749	30.9346	297.924	755.135	738.49	342.088
Transketolase 2a s	352.963	172.175	190.043	162.211	266.187	743.767	171.927	190.056	455.81	272.305	684.227	136.145	167.051	205.662	164.138	195.614	321.572	647.773	524.815	332.873	178.729	213.064	351.132	484.05	471.146	679.244	417.624	258.031	490.121	197.977	355.42	471.203	373.073	300.662	287.411	419.624	659.907	416.765	214.622	204.646	750.392	500.357	219.859	194.448	421.217	650.484	141.39	216.9	268.498
Transketolase 3a s	635.78	245.598	531.494	226.934	897.852	782.494	444.899	587.69	730.858	970.274	579.219	960.899	981.542	338.983	873.875	920.95	384.315	942.723	445.828	825.812	868.975	229.853	909.516	401.132	764.091	554.741	784.81	250.028	911.969	931.244	299.998	506.788	513.638	956.407	243.264	947.606	846.236	974.968	212.866	827.003	681.269	861.26	311.034	408.187	622.251	660.794	355.124	895.273	845.219
Transketolase 3a s_rev	415.483	257.802	474.118	197.39	764.332	171.394	405.638	530.301	407.714	830.636	27.6582	957.42	947.158	265.988	842.404	858.002	195.409	427.617	53.6796	625.606	822.912	149.456	691.051	49.7492	425.611	8.16414	499.852	124.663	554.514	865.934	77.2456	168.252	273.231	788.411	88.5198	660.648	318.995	690.87	130.91	755.023	63.5438	493.569	223.842	346.406	333.701	142.977	346.401	811.039	709.388
Transketolase 4a s	220.296	172.175	57.3761	29.5447	133.521	611.101	39.2606	57.3896	323.144	139.638	551.561	3.4787	34.384	72.995	31.4715	62.9473	188.905	515.106	392.148	200.207	46.0624	80.3972	218.465	351.383	338.48	546.577	284.957	125.365	357.454	65.3099	222.753	338.536	240.407	167.996	154.744	286.958	527.24	284.098	81.9557	71.9793	617.725	367.69	87.192	61.7814	288.55	517.817	8.72316	84.2337	135.831
Aldolase 1b s	685.302	211.53	967.788	920.488	743.266	957.163	487.453	427.984	776.909	857.183	876.091	737.032	631.605	752.7	550.655	855.875	997.361	862.311	862.165	547.333	646.899	808.03	377.699	851.625	584.359	869.123	556.936	721.239	788.172	909.75	947.007	478.752	769.565	971.276	966.006	830.386	999.983	649.274	527.401	917.287	913.869	875.889	406.935	342.597	556.547	809.971	738.765	499.677	716.953
Aldolase 1b s_rev	309.283	206.901	272.767	186.212	96.5936	351.112	73.3481	93.4577	4.79059	206.957	304.954	107.046	44.9836	195.605	145.612	378.29	225.762	352.438	33.8139	110.206	37.787	49.3479	9.9017	271.833	1.96995	139.779	180.302	137.531	230.483	495.709	618.716	43.9858	87.241	636.772	387.823	326.324	467.12	76.9902	49.7835	557.163	567.751	517.576	127.806	39.7593	216.768	121.584	364.839	203.667	162.485
Aldolase 2b s	376.019	180.129	695.021	734.277	646.673	606.051	414.105	334.526	772.119	650.226	571.138	629.987	586.622	557.095	405.042	477.585	771.599	509.873	828.351	437.128	609.112	758.682	367.798	579.792	582.389	729.345	376.633	583.709	557.689	414.042	328.291	434.766	682.324	334.504	578.183	504.062	532.863	572.284	477.617	360.123	346.118	358.312	279.128	302.838	339.779	688.387	373.926	296.01	554.468
Aldolase 3b s	613.654	243.751	920.204	771.367	672.681	668.782	859.565	427.59	731.359	876.577	521.565	865.447	743.546	505.67	558.12	596.55	897.601	571.07	739.378	800.713	918.395	833.738	712.044	779.093	563.597	830.701	606.547	618.831	667.543	516.76	638.404	518.144	677.891	929.173	680.015	574.987	701.281	716.987	728.016	655.412	383.497	493.206	221.854	733.894	756.18	968.448	479.809	532.528	570.572
Aldolase 3b s_rev	370.302	243.993	357.85	169.757	158.675	195.398	578.126	225.731	91.9071	359.018	83.0942	368.127	289.591	81.2413	285.744	251.632	258.668	193.863	43.6936	496.252	441.95	207.723	476.913	331.968	113.874	234.023	362.58	167.788	242.52	235.385	442.78	216.044	128.233	727.336	234.498	203.591	301.085	277.369	383.066	427.955	170.046	267.56	75.3924	563.723	549.068	412.728	238.55	369.185	148.772
Aldolase 4b s	243.352	180.129	562.354	601.61	514.006	473.384	281.439	201.859	639.452	517.559	438.471	497.32	453.955	424.429	272.376	344.918	638.933	377.207	695.684	304.461	476.445	626.015	235.131	447.125	449.723	596.678	243.967	451.042	425.022	281.375	195.624	302.1	549.658	201.837	445.517	371.396	400.196	439.617	344.95	227.457	213.451	225.646	146.462	170.171	207.112	555.72	241.259	163.343	421.801
Sedoheptulose-1,7-phosphatase 1 s	561.19	248.616	408.952	931.829	866.28	133.097	894.28	428.025	233.136	287.513	613.642	137.511	851.91	302.564	291.94	666.839	434.282	346.071	203.53	510.563	750.545	499.61	837.369	534.026	308.771	228.519	653.336	862.374	140.447	151.837	560.471	856.436	481.651	736.928	559.983	210.385	550.617	661.403	442.375	302.572	155.163	329.573	366.918	577.746	970.792	911.321	989.04	649.231	351.423
Sedoheptulose-1,7-phosphatase 1 s_rev	428.524	248.616	276.285	799.163	733.613	0.430006	761.613	295.359	100.47	154.846	480.975	4.84441	719.244	169.897	159.274	534.172	301.615	213.405	70.8629	377.897	617.878	366.943	704.702	401.359	176.105	95.8523	520.669	729.707	7.77985	19.1705	427.804	723.77	348.984	604.261	427.317	77.7181	417.95	528.736	309.708	169.905	22.4962	196.907	234.251	445.079	838.125	778.654	856.373	516.565	218.757
Sedoheptulose-1,7-phosphatase 2 s	132.667	1.59241e-12	132.667	132.667	132.667	132.667	132.667	132.667	132.667	132.667	132.667	132.667	132.667	132.667	132.667	132.667	132.667	132.667	132.667	132.667	132.667	132.667	132.667	132.667	132.667	132.667	132.667	132.667	132.667	132.667	132.667	132.667	132.667	132.667	132.667	132.667	132.667	132.667	132.667	132.667	132.667	132.667	132.667	132.667	132.667	132.667	132.667	132.667	132.667
Transketolase 1b s	677.255	210.293	399.948	988.631	393.38	219.833	904.418	465.233	755.339	253.434	430.544	876.251	393.261	408.68	479.118	389.77	649.128	675.409	876.876	768.666	473.072	513.461	539.381	679.326	476.995	962.438	929.246	401.343	411.694	682.508	491.836	707.593	990.542	785.204	989.88	383.266	216.422	818.462	732.73	660.958	952.683	886.432	582.965	768.9	562.677	405.166	320.87	693.308	723.117
Transketolase 1b s_rev	326.813	212.722	11.0791	727.044	22.4583	16.0993	298.975	153.711	557.312	33.6558	242.424	546.632	40.375	183.976	4.96558	178.876	170.779	266.034	78.8484	246.788	248.33	239.101	357.55	408.523	51.6434	312.254	770.224	224.079	84.4775	357.282	186.526	446.715	739.85	515.293	836.33	92.9606	26.8223	63.0095	393.992	66.346	446.778	116.914	445.023	371.007	330.063	155.84	99.1055	468.436	241.391
Transketolase 2b s	350.442	169.18	388.868	261.587	370.922	203.734	605.442	311.522	198.028	219.778	188.12	329.619	352.886	224.704	474.153	210.894	478.349	409.375	798.028	521.878	224.742	274.36	181.831	270.803	425.352	650.184	159.022	177.264	327.217	325.225	305.31	260.878	250.692	269.91	153.55	290.305	189.599	755.452	338.738	594.612	505.905	769.517	137.941	397.893	232.615	249.325	221.764	224.872	481.726
Transketolase 3b s	621.652	245.09	425.683	566.124	632.353	843.167	540.815	695.859	157.695	234.854	650.864	591.305	848.997	352.49	936.337	727.222	655.84	284.919	917.757	585.136	905.77	405.367	230.02	812.582	959.599	856.003	506.945	847.937	514.148	247.391	796.075	248.213	306.408	286.374	294.723	823.149	101.654	914.223	215.41	731.702	771.596	852.451	546.851	990.928	516.007	407.905	547.268	464.14	662.838
Transketolase 3b s_rev	403.876	250.607	169.481	437.203	394.098	772.1	68.0393	517.004	92.3344	147.742	595.41	394.353	628.778	260.453	594.851	648.994	310.157	8.2114	252.396	195.924	813.695	263.673	180.856	674.446	666.914	338.486	480.59	803.34	319.598	54.8324	623.432	120.002	188.382	149.13	273.84	665.51	44.721	291.438	9.33872	269.757	398.358	215.6	541.576	725.702	416.059	291.246	458.17	371.935	313.779
Transketolase 4b s	217.776	169.18	256.202	128.92	238.255	71.0672	472.776	178.856	65.3608	87.1118	55.4537	196.952	220.219	92.0374	341.486	78.2273	345.682	276.708	665.361	389.212	92.0755	141.693	49.1646	138.137	292.685	517.518	26.355	44.597	194.55	192.559	172.643	128.211	118.026	137.244	20.8836	157.638	56.9328	622.786	206.071	461.945	373.238	636.851	5.27446	265.227	99.948	116.659	89.0978	92.2054	349.059
Ribulose-5-phosphate epimerase 1 s	723.691	178.28	809.335	852.491	696.766	961.803	722.351	470.01	801.9	354.923	922.901	673.635	795.758	431.983	734.529	461.119	406.165	919.597	445.903	975.278	701.91	895.779	957.581	555.24	740.735	891.238	685.494	437.319	727.706	871.814	907.258	932.753	474.552	779.484	923.386	974.548	664.266	638.424	863.777	585.935	456.927	591.451	798.126	901.818	750.177	649.439	615.234	925.049	645.533
Ribulose-5-phosphate epimerase 1 s_rev	264.468	175.81	147.843	390.766	34.7734	99.3646	59.2416	47.6929	127.092	29.0725	291.773	63.3408	322.142	63.7191	295.203	182.517	92.0616	617.504	28.5907	319.701	322.369	623.367	444.689	108.128	264.246	384.673	143.173	151.578	422.235	453.329	573.052	602.123	185.331	225.01	441.474	430.291	62.7698	235.208	253.611	66.5349	35.7653	135.272	96.6192	192.435	36.9443	71.6994	78.2231	281.668	198.874
Ribulose-5-phosphate epimerase 2 s	459.223	151.704	661.492	461.726	661.993	862.438	663.109	422.317	674.808	325.851	631.128	610.294	473.616	368.264	439.326	278.603	314.103	302.093	417.312	655.577	379.541	272.413	512.893	447.112	476.489	506.566	542.321	285.741	305.471	418.485	334.206	330.63	289.221	554.474	481.912	544.257	601.496	403.216	610.167	519.4	421.161	456.179	701.506	709.383	713.232	577.739	537.011	643.381	446.659
Ribulose-5-phosphate epimerase 3 s	604.474	244.266	692.832	616.358	927.554	765.465	785.629	801.544	681.62	779.289	559.155	989.698	626.109	324.574	748.647	727.106	533.782	226.716	746.69	412.991	863.305	933.75	633.006	769.939	447.655	624.458	727.103	34.6622	362.374	212.091	205.986	858.671	760.154	574.861	810.698	790.429	990.451	834.079	381.526	308.551	340.547	194.19	557.078	869.224	570.911	819.268	688.13	543.327	794.762
Ribulose-5-phosphate epimerase 3 s_rev	410.585	247.063	296.673	419.966	530.895	168.36	387.854	644.56	272.146	718.771	193.36	644.737	417.827	221.643	574.654	713.837	485.012	189.956	594.711	22.7478	749.097	926.671	385.447	588.16	236.5	383.225	450.115	14.2542	322.236	58.9391	137.113	793.375	736.266	285.72	594.119	511.505	654.288	696.196	36.6925	54.4845	184.719	3.34357	120.905	425.174	123.012	506.862	416.452	165.28	613.436
Ribulose-5-phosphate epimerase 4 s	193.89	151.704	396.159	196.392	396.659	597.105	397.776	156.984	409.475	60.5175	365.795	344.961	208.283	102.931	173.993	13.2692	48.77	36.7599	151.979	390.243	114.208	7.07938	247.559	181.779	211.155	241.232	276.988	20.408	40.1381	153.152	68.8725	65.2963	23.8879	289.141	216.579	278.924	336.163	137.883	344.833	254.067	155.828	190.846	436.173	444.05	447.899	312.406	271.678	378.048	181.326
Ribose-5-phosphate isomerase 1 s	662.92	212.229	698.709	573.671	549.757	332.733	739.091	872.788	631.292	475.992	775.745	317.365	902.173	937.703	941.897	746.537	674.731	683.719	416.451	879.26	587.639	746.537	961.346	627.957	868.577	698.007	594.381	894.236	995.375	830.423	279.17	685.971	834.075	959.182	861.684	994.863	869.653	538.936	670.208	691.532	929.562	866.052	706.904	753.184	444.693	501.147	328.594	484.638	508.778
Ribose-5-phosphate isomerase 1 s_rev	276.049	180.049	104.893	228.954	273.623	193.26	376.664	40.0491	365.092	58.8281	294.244	154.664	202.431	436.925	328.496	511.733	297.316	225.389	76.6478	279.797	113.444	326.441	437.047	443.898	595.635	328.399	28.5711	136.703	184.637	269.43	79.4413	204.997	383.37	189.76	469.25	721.003	449.931	256.909	295.761	35.5336	672.015	540.502	119.689	36.4755	129.205	30.754	194.806	286.477	294.479
Ribose-5-phosphate isomerase 2 s	386.871	180.439	593.816	344.717	276.134	139.474	362.427	832.739	266.199	417.164	481.5	162.701	699.742	500.778	613.401	234.804	377.415	458.33	339.803	599.462	474.195	420.096	524.299	184.058	272.942	369.607	565.81	757.532	810.738	560.993	199.729	480.974	450.705	769.422	392.434	273.86	419.722	282.027	374.447	655.998	257.547	325.55	587.215	716.709	315.488	470.393	133.788	198.161	214.3
Ribose-5-phosphate isomerase 3 s	621.486	249.837	558.627	608.097	316.852	347.655	282.261	982.099	919.003	298.008	680.097	119.462	920.092	856.067	667.197	326.505	300.141	625.013	959.931	871.405	828.618	764.298	443.78	479.736	460.044	364.747	661.077	824.915	943.624	886.195	398.604	589.188	649.39	699.336	668.221	351.861	802.441	562.156	311.879	810.086	638.947	994.175	770.584	976.439	369.413	661.718	527.638	225.445	719.451
Ribose-5-phosphate isomerase 3 s_rev	367.283	239.851	97.4776	396.046	173.385	340.849	52.5005	282.026	785.47	13.5099	331.264	89.4275	353.017	487.955	186.463	224.368	55.3927	299.35	752.794	404.609	487.09	476.869	52.1481	428.345	319.768	127.807	227.933	200.049	265.553	457.869	331.543	240.88	331.351	62.5807	408.454	210.667	515.385	412.796	70.0979	286.755	514.067	801.292	316.036	392.397	186.592	323.992	526.517	159.95	637.818
Ribose-5-phosphate isomerase 4 s	254.204	180.439	461.15	212.05	143.467	6.80689	229.76	700.072	133.533	284.498	348.834	30.0343	567.076	368.112	480.734	102.137	244.748	325.663	207.137	466.796	341.529	287.429	391.632	51.3916	140.276	236.941	433.144	624.866	678.071	428.326	67.0619	348.307	318.039	636.755	259.767	141.194	287.055	149.36	241.781	523.332	124.88	192.883	454.548	584.042	182.822	337.727	1.12097	65.4946	81.6331
Phosphoribulokinase 1 s	785.226	159.816	937.217	505.84	626.385	639.336	864.535	876.836	831.734	945.694	890.7	644.01	563.683	641.997	856.481	616.533	550.822	734.738	526.018	869.937	820.478	832.948	433.979	991.6	447.985	955.319	820.77	689.595	736.767	993.663	670.243	953.13	923.746	774.008	851.275	976.204	877.461	921.362	901.396	919.501	950.273	530.682	692.52	797.436	641.841	799.102	985.618	770.644	993.429
Phosphoribulokinase 1 s_rev	387.226	159.816	539.217	107.84	228.385	241.336	466.535	478.836	433.734	547.694	492.7	246.01	165.683	243.997	458.481	218.533	152.822	336.738	128.018	471.937	422.478	434.948	35.979	593.6	49.9852	557.319	422.77	291.595	338.767	595.663	272.243	555.13	525.746	376.008	453.275	578.204	479.461	523.362	503.396	521.501	552.273	132.682	294.52	399.436	243.841	401.102	587.618	372.644	595.429
Phosphoribulokinase 2 s	398	0	398	398	398	398	398	398	398	398	398	398	398	398	398	398	398	398	398	398	398	398	398	398	398	398	398	398	398	398	398	398	398	398	398	398	398	398	398	398	398	398	398	398	398	398	398	398	398
Phosphoglucoisomerase 1 s	659.96	231.729	468.829	334.861	278.902	514.823	570.608	670.934	926.188	115.747	466.132	601.036	209.989	846.55	847.814	923.09	375.226	771.804	836.894	271.679	652.354	544.749	726.113	686.851	912.823	646.111	981.285	957.809	944.98	115.517	767.351	710.821	583.612	792.579	664.713	577.791	676.002	650.939	715.522	255.161	802.631	256.493	827.761	938.751	421.788	398.398	727.23	825.692	581.2
Phosphoglucoisomerase 1 s_rev	353.147	231.198	135.361	274.696	150.113	79.3626	369.76	222.752	503.339	30.0854	1.8895	127.873	134.567	617.601	521.896	706.344	21.5767	594.216	597.526	197.247	314.735	201.28	393.269	323.776	489.36	327.09	600.442	538.218	792.335	64.8854	296.959	171.562	368.627	104.242	155.275	225.571	611.069	374.145	380.729	35.3752	484.047	222.323	792.03	892.291	216.299	168.295	377.029	192.516	236.106
Phosphoglucoisomerase 2 s	306.812	196.658	333.468	60.1646	128.789	435.461	200.848	448.182	422.849	85.6615	464.243	473.163	75.4225	228.949	325.918	216.746	353.649	177.588	239.368	74.4322	337.618	343.469	332.844	363.075	423.463	319.021	380.843	419.591	152.644	50.6315	470.393	539.258	214.986	688.337	509.438	352.22	64.9323	276.793	334.793	219.786	318.584	34.1703	35.7311	46.4607	205.489	230.104	350.201	633.176	345.094
Phosphoglucoisomerase 3 s	623.962	241.481	314.932	270.392	572.454	456.526	390.269	920.743	484.509	726.935	650.882	865.071	995.303	660.284	863.709	766.247	299.883	244.178	356.672	762.847	504.74	141.589	908.925	603.329	546.866	592.66	880.801	717.712	521.521	141.242	754.555	877.268	670.516	696.866	534.316	385.952	487.068	571.957	140.206	938.932	909.448	628.507	918.219	732.279	984.158	324.574	331.213	578.168	675.255
Phosphoglucoisomerase 3 s_rev	365.703	236.009	20.998	199.301	326.887	9.39777	152.044	433.419	94.8097	683.088	166.673	291.264	893.234	515.463	563.87	647.64	160.128	156.145	150.866	660.89	265.783	10.6172	522.339	195.294	56.9187	232.846	526.381	295.446	380.647	139.328	335.202	439.52	453.678	28.0915	138.698	115.01	401.042	358.898	17.8583	727.157	809.191	466.04	791.286	652.713	852.933	218.896	45.2676	161.462	321.778
Phosphoglucoisomerase 4 s	258.259	187.564	293.933	71.0918	245.567	447.129	238.225	487.324	389.699	43.8475	484.208	573.807	102.069	144.821	299.84	118.608	139.755	88.033	205.807	101.958	238.957	130.972	386.586	408.035	489.947	359.815	354.42	422.265	140.874	1.91467	419.352	437.748	216.838	668.775	395.618	270.941	86.0259	213.059	122.348	211.775	100.257	162.466	126.933	79.5663	131.225	105.678	285.945	416.706	353.477
Phosphoglucomutase 1 s	657.382	228.586	956.483	550.819	588.603	443.626	330.552	159.815	599.111	370.244	613.347	868.869	854.697	993.105	101.837	774.293	789.529	492.301	911.558	932.732	617.676	786.567	262.205	967.747	996.958	682.579	840.078	610.329	704.175	798.605	908.974	595.047	487.277	951.281	915.941	904.359	713.411	990.604	846.833	695.261	813.968	369.488	940.391	827.253	839.846	697.357	914.744	287.305	113.546
Phosphoglucomutase 1 s_rev	357.43	228.499	633.155	528.76	467.243	131.31	301.98	147.339	298.313	114.079	150.967	67.8465	415.776	524.8	56.8261	400.186	396.368	279.518	539.138	884.948	479.659	120.975	37.7073	368.49	964.305	644.875	217.819	532.255	102.15	587.885	188.127	236.717	382.767	859.349	533.716	494.893	530.695	735.713	40.9468	203.188	116.661	107.166	290.687	572.901	112.064	137.071	613.028	37.9775	68.5779
Phosphoglucomutase 2 s	299.952	205.016	323.327	22.0594	121.36	312.316	28.5722	12.476	300.798	256.165	462.38	801.022	438.921	468.305	45.0105	374.107	393.161	212.783	372.419	47.7838	138.017	665.592	224.498	599.257	32.6528	37.7031	622.259	78.0741	602.025	210.72	720.847	358.329	104.51	91.9318	382.224	409.465	182.716	254.892	805.886	492.073	697.306	262.322	649.704	254.352	727.782	560.286	301.716	249.328	44.9682
Phosphoglucomutase 3 s	625.746	242.894	681.956	605.446	337.558	377.258	609.578	955.453	412.692	266.121	601.742	998.91	539.944	815.976	821.109	720.672	535.374	359.364	943.735	183.95	156.839	984.152	760.84	897.138	158.49	375.507	861.396	145.436	724.085	467.827	829.829	716.478	719.786	325.078	926.257	898.197	542.269	754.609	954.468	518.908	554.045	955.948	981.909	836.49	877.073	638.876	330.502	342.446	369.508
Phosphoglucomutase 3 s_rev	374.347	229.883	398.163	572.459	99.4193	53.2741	543.628	903.835	145.044	51.7697	119.397	97.2439	74.3768	431.8	802.177	444.703	356.108	236.136	604.877	108.641	117.483	531.058	482.6	252.92	59.3536	297.011	265.559	64.6877	133.83	305.824	160.022	459.659	613.424	252.709	657.853	570.011	338.459	563.452	361.027	34.8454	75.0658	565.33	241.003	549.032	223.556	203.015	93.0425	309.588	316.157
Phosphoglucomutase 4 s	251.399	193.904	283.793	32.9866	238.139	323.984	65.9494	51.6179	267.648	214.351	482.345	901.666	465.568	384.176	18.9318	275.969	179.266	123.228	338.858	75.3094	39.3561	453.094	278.24	644.217	99.1365	78.4967	595.837	80.7485	590.255	162.003	669.807	256.819	106.362	72.3693	268.404	328.186	203.81	191.157	593.441	484.062	478.979	390.618	740.906	287.458	653.517	435.861	237.46	32.8584	53.3511
Glucose-1-phosphate adenylyltransferase 1 s	508.63	195.102	526.566	177.588	481.608	321.695	522.793	208.355	619.144	156.996	589.826	433.327	473.29	268.516	315.076	454.851	340.894	165.025	289.012	600.195	529.748	564.77	149.357	546.529	288.739	419.089	209.448	452.447	566.309	600.749	960.1	734.847	805.592	768.574	381.394	647.914	656.316	603.98	755.424	465.521	625.523	564.1	200.965	632.238	480.746	473.505	449.937	616.725	434.284
Glucose-1-phosphate adenylyltransferase 1 s_rev	245.204	180.231	215.817	49.168	424.755	136.599	453.54	45.5933	301.319	52.2432	550.873	260.887	136.252	165.504	7.1569	347.028	32.3961	0.354995	129.172	542.41	141.937	257.697	8.63655	271.072	150.763	238.329	174.191	174.814	179.579	145.306	211.537	74.7452	705.903	707.699	148.86	478.035	517.879	290.698	138.827	126.71	251.29	537.843	66.6117	294.611	251.194	34.5506	329.748	93.1578	177.253
Glucose-1-phosphate adenylyltransferase 2 s	263.426	171.667	310.748	128.42	56.8528	185.097	69.2532	162.762	317.825	104.753	38.9534	172.44	337.038	103.011	307.919	107.823	308.498	164.67	159.84	57.7851	387.812	307.073	140.72	275.457	137.976	180.76	35.2561	277.632	386.73	455.442	748.563	660.102	99.6897	60.8746	232.534	169.879	138.438	313.282	616.598	338.811	374.233	26.2568	134.354	337.627	229.553	438.954	120.189	523.567	257.031
Glucose-1-phosphate adenylyltransferase 3 s	607.307	247.478	328.643	815.877	562.417	312.531	207.009	823.387	997.497	238.518	405.645	405.125	828.106	178.72	987.369	380.765	312.362	708.076	718.411	836.27	564.433	352.083	339.809	366.103	990.909	243.587	536.517	502.526	848.991	654.253	930.606	964.436	787.156	887.587	737.774	343.403	880.863	551.088	642.146	709.696	609.45	966.314	567.85	962.152	523.823	871.957	740.258	562.203	355.195
Glucose-1-phosphate adenylyltransferase 3 s_rev	392.434	248.332	57.4298	676.53	388.786	115.767	100.378	621.483	712.822	175.58	346.727	132.041	464.421	159.836	705.529	371.08	217.759	632.961	592.132	750.959	275.282	257.508	145.347	45.6864	786.449	22.0338	527.684	222.219	474.032	247.527	233.084	405.844	685.614	846.275	619.06	254.803	721.332	301.541	237.993	378.895	453.545	811.762	342.294	591.419	368.535	557.428	684.325	255.105	89.7809
Glucose-1-phosphate adenylyltransferase 4 s	214.873	166.956	271.214	139.347	173.632	196.765	106.63	201.903	284.674	62.9386	58.9187	273.083	363.684	18.8832	281.84	9.68449	94.6039	75.1147	126.279	85.3106	289.151	94.5751	194.462	320.417	204.46	221.553	8.8335	280.307	374.959	406.725	697.523	558.592	101.542	41.3121	118.714	88.6001	159.531	249.547	404.153	330.8	155.906	154.553	225.556	370.732	155.289	314.529	55.9326	307.098	265.414
ADPGstore s	528.337	267.241	233.353	736.543	783.867	945.303	126.341	231.433	323.786	877.33	868.129	302.928	579.955	190.64	256.617	627.636	514.777	276.655	378.397	272.224	814.879	689.511	190.896	850.576	819.178	849.815	375.135	623.813	270.415	467.657	900.056	740.157	303.99	396.883	182.357	313.042	724.857	409.661	498.038	794.86	315.633	50.5743	789.454	23.5752	563.604	417.705	418.435	247.535	32.9595
ADPGstore s_rev	479.783	267.713	193.818	747.47	900.646	956.971	163.718	270.574	290.635	835.516	888.094	403.571	606.602	106.511	230.538	529.498	300.882	187.1	344.836	299.75	716.218	477.013	244.637	895.536	885.662	890.608	348.712	626.487	258.645	418.941	849.015	638.647	305.842	377.32	68.5363	231.763	745.951	345.926	285.593	786.85	97.3054	178.87	880.656	56.6808	489.339	293.279	354.179	31.0661	41.3424
Rubisco carboxylase 1 y	184.308	55.1134	196.11	186.81	192.486	237.844	140.072	249.53	237.479	230.472	156.113	228.245	176.684	275.492	238.945	134.401	230.681	214.834	122.484	95.5488	109.819	173.557	172.12	275.93	205.904	156.346	174.215	91.5904	237.763	227.669	253.677	257.295	171.069	164.435	116.681	88.7781	162.53	204.733	227.252	266.466	93.9228	138.598	275.662	212.593	165.826	254.698	124.846	267.556	136.968
Rubisco carboxylase 1 y_rev	97.6445	55.1133	109.446	100.145	105.828	151.182	53.409	162.867	150.81	143.809	69.4472	141.575	90.0183	188.831	152.282	47.7423	144.018	128.175	35.8146	8.88418	23.1535	86.8988	85.4574	189.272	119.245	69.6838	87.5552	4.92851	151.093	141.005	167.009	170.625	84.4071	77.7662	30.0127	2.11221	75.8699	118.073	140.582	179.796	7.2572	51.94	188.999	125.93	79.1679	168.039	38.1856	180.898	50.3066
Rubisco carboxylase 2 y	86.6637	0.00353551	86.6636	86.6644	86.6582	86.662	86.6627	86.6628	86.6687	86.6632	86.6659	86.6701	86.6653	86.6604	86.6628	86.6585	86.663	86.6594	86.6694	86.6646	86.6652	86.6582	86.6626	86.6586	86.6594	86.6626	86.6599	86.6619	86.6701	86.6644	86.6679	86.6703	86.6621	86.6683	86.6683	86.6659	86.6599	86.6607	86.6697	86.6701	86.6656	86.6582	86.6628	86.6632	86.6586	86.6586	86.6606	86.6582	86.661
Phosphoglycerate kinase 1 y	0	0	0	0	0	0	0	0	0	0	0	0	0	0	0	0	0	0	0	0	0	0	0	0	0	0	0	0	0	0	0	0	0	0	0	0	0	0	0	0	0	0	0	0	0	0	0	0	0
Phosphoglycerate kinase 1 y_rev	0	0	0	0	0	0	0	0	0	0	0	0	0	0	0	0	0	0	0	0	0	0	0	0	0	0	0	0	0	0	0	0	0	0	0	0	0	0	0	0	0	0	0	0	0	0	0	0	0
Phosphoglycerate kinase 2 y	0	0	0	0	0	0	0	0	0	0	0	0	0	0	0	0	0	0	0	0	0	0	0	0	0	0	0	0	0	0	0	0	0	0	0	0	0	0	0	0	0	0	0	0	0	0	0	0	0
Phosphoglycerate kinase 3 y	0	0	0	0	0	0	0	0	0	0	0	0	0	0	0	0	0	0	0	0	0	0	0	0	0	0	0	0	0	0	0	0	0	0	0	0	0	0	0	0	0	0	0	0	0	0	0	0	0
Phosphoglycerate kinase 3 y_rev	0	0	0	0	0	0	0	0	0	0	0	0	0	0	0	0	0	0	0	0	0	0	0	0	0	0	0	0	0	0	0	0	0	0	0	0	0	0	0	0	0	0	0	0	0	0	0	0	0
Phosphoglycerate kinase 4 y	0	0	0	0	0	0	0	0	0	0	0	0	0	0	0	0	0	0	0	0	0	0	0	0	0	0	0	0	0	0	0	0	0	0	0	0	0	0	0	0	0	0	0	0	0	0	0	0	0
Glyceraldehyde-3-phosphate dehydrogenase 1 y	0	0	0	0	0	0	0	0	0	0	0	0	0	0	0	0	0	0	0	0	0	0	0	0	0	0	0	0	0	0	0	0	0	0	0	0	0	0	0	0	0	0	0	0	0	0	0	0	0
Glyceraldehyde-3-phosphate dehydrogenase 1 y_rev	0	0	0	0	0	0	0	0	0	0	0	0	0	0	0	0	0	0	0	0	0	0	0	0	0	0	0	0	0	0	0	0	0	0	0	0	0	0	0	0	0	0	0	0	0	0	0	0	0
Glyceraldehyde-3-phosphate dehydrogenase 2 y	0	0	0	0	0	0	0	0	0	0	0	0	0	0	0	0	0	0	0	0	0	0	0	0	0	0	0	0	0	0	0	0	0	0	0	0	0	0	0	0	0	0	0	0	0	0	0	0	0
Glyceraldehyde-3-phosphate dehydrogenase 3 y	0	0	0	0	0	0	0	0	0	0	0	0	0	0	0	0	0	0	0	0	0	0	0	0	0	0	0	0	0	0	0	0	0	0	0	0	0	0	0	0	0	0	0	0	0	0	0	0	0
Glyceraldehyde-3-phosphate dehydrogenase 3 y_rev	0	0	0	0	0	0	0	0	0	0	0	0	0	0	0	0	0	0	0	0	0	0	0	0	0	0	0	0	0	0	0	0	0	0	0	0	0	0	0	0	0	0	0	0	0	0	0	0	0
Glyceraldehyde-3-phosphate dehydrogenase 4 y	0	0	0	0	0	0	0	0	0	0	0	0	0	0	0	0	0	0	0	0	0	0	0	0	0	0	0	0	0	0	0	0	0	0	0	0	0	0	0	0	0	0	0	0	0	0	0	0	0
Triosephosphate isomerase 1 y	0	0	0	0	0	0	0	0	0	0	0	0	0	0	0	0	0	0	0	0	0	0	0	0	0	0	0	0	0	0	0	0	0	0	0	0	0	0	0	0	0	0	0	0	0	0	0	0	0
Triosephosphate isomerase 1 y_rev	0	0	0	0	0	0	0	0	0	0	0	0	0	0	0	0	0	0	0	0	0	0	0	0	0	0	0	0	0	0	0	0	0	0	0	0	0	0	0	0	0	0	0	0	0	0	0	0	0
Triosephosphate isomerase 2 y	0	0	0	0	0	0	0	0	0	0	0	0	0	0	0	0	0	0	0	0	0	0	0	0	0	0	0	0	0	0	0	0	0	0	0	0	0	0	0	0	0	0	0	0	0	0	0	0	0
Triosephosphate isomerase 3 y	0	0	0	0	0	0	0	0	0	0	0	0	0	0	0	0	0	0	0	0	0	0	0	0	0	0	0	0	0	0	0	0	0	0	0	0	0	0	0	0	0	0	0	0	0	0	0	0	0
Triosephosphate isomerase 3 y_rev	0	0	0	0	0	0	0	0	0	0	0	0	0	0	0	0	0	0	0	0	0	0	0	0	0	0	0	0	0	0	0	0	0	0	0	0	0	0	0	0	0	0	0	0	0	0	0	0	0
Triosephosphate isomerase 4 y	0	0	0	0	0	0	0	0	0	0	0	0	0	0	0	0	0	0	0	0	0	0	0	0	0	0	0	0	0	0	0	0	0	0	0	0	0	0	0	0	0	0	0	0	0	0	0	0	0
Aldolase 1a y	0	0	0	0	0	0	0	0	0	0	0	0	0	0	0	0	0	0	0	0	0	0	0	0	0	0	0	0	0	0	0	0	0	0	0	0	0	0	0	0	0	0	0	0	0	0	0	0	0
Aldolase 1a y_rev	0	0	0	0	0	0	0	0	0	0	0	0	0	0	0	0	0	0	0	0	0	0	0	0	0	0	0	0	0	0	0	0	0	0	0	0	0	0	0	0	0	0	0	0	0	0	0	0	0
Aldolase 2a y	0	0	0	0	0	0	0	0	0	0	0	0	0	0	0	0	0	0	0	0	0	0	0	0	0	0	0	0	0	0	0	0	0	0	0	0	0	0	0	0	0	0	0	0	0	0	0	0	0
Aldolase 3a y	0	0	0	0	0	0	0	0	0	0	0	0	0	0	0	0	0	0	0	0	0	0	0	0	0	0	0	0	0	0	0	0	0	0	0	0	0	0	0	0	0	0	0	0	0	0	0	0	0
Aldolase 3a y_rev	0	0	0	0	0	0	0	0	0	0	0	0	0	0	0	0	0	0	0	0	0	0	0	0	0	0	0	0	0	0	0	0	0	0	0	0	0	0	0	0	0	0	0	0	0	0	0	0	0
Aldolase 4a y	0	0	0	0	0	0	0	0	0	0	0	0	0	0	0	0	0	0	0	0	0	0	0	0	0	0	0	0	0	0	0	0	0	0	0	0	0	0	0	0	0	0	0	0	0	0	0	0	0
Fructose-1,6-bisphosphatase 1 y	0	0	0	0	0	0	0	0	0	0	0	0	0	0	0	0	0	0	0	0	0	0	0	0	0	0	0	0	0	0	0	0	0	0	0	0	0	0	0	0	0	0	0	0	0	0	0	0	0
Fructose-1,6-bisphosphatase 1 y_rev	0	0	0	0	0	0	0	0	0	0	0	0	0	0	0	0	0	0	0	0	0	0	0	0	0	0	0	0	0	0	0	0	0	0	0	0	0	0	0	0	0	0	0	0	0	0	0	0	0
Fructose-1,6-bisphosphatase 2 y	0	0	0	0	0	0	0	0	0	0	0	0	0	0	0	0	0	0	0	0	0	0	0	0	0	0	0	0	0	0	0	0	0	0	0	0	0	0	0	0	0	0	0	0	0	0	0	0	0
Transketolase 1a y	0	0	0	0	0	0	0	0	0	0	0	0	0	0	0	0	0	0	0	0	0	0	0	0	0	0	0	0	0	0	0	0	0	0	0	0	0	0	0	0	0	0	0	0	0	0	0	0	0
Transketolase 1a y_rev	0	0	0	0	0	0	0	0	0	0	0	0	0	0	0	0	0	0	0	0	0	0	0	0	0	0	0	0	0	0	0	0	0	0	0	0	0	0	0	0	0	0	0	0	0	0	0	0	0
Transketolase 2a y	0	0	0	0	0	0	0	0	0	0	0	0	0	0	0	0	0	0	0	0	0	0	0	0	0	0	0	0	0	0	0	0	0	0	0	0	0	0	0	0	0	0	0	0	0	0	0	0	0
Transketolase 3a y	0	0	0	0	0	0	0	0	0	0	0	0	0	0	0	0	0	0	0	0	0	0	0	0	0	0	0	0	0	0	0	0	0	0	0	0	0	0	0	0	0	0	0	0	0	0	0	0	0
Transketolase 3a y_rev	0	0	0	0	0	0	0	0	0	0	0	0	0	0	0	0	0	0	0	0	0	0	0	0	0	0	0	0	0	0	0	0	0	0	0	0	0	0	0	0	0	0	0	0	0	0	0	0	0
Transketolase 4a y	0	0	0	0	0	0	0	0	0	0	0	0	0	0	0	0	0	0	0	0	0	0	0	0	0	0	0	0	0	0	0	0	0	0	0	0	0	0	0	0	0	0	0	0	0	0	0	0	0
Aldolase 1b y	0	0	0	0	0	0	0	0	0	0	0	0	0	0	0	0	0	0	0	0	0	0	0	0	0	0	0	0	0	0	0	0	0	0	0	0	0	0	0	0	0	0	0	0	0	0	0	0	0
Aldolase 1b y_rev	0	0	0	0	0	0	0	0	0	0	0	0	0	0	0	0	0	0	0	0	0	0	0	0	0	0	0	0	0	0	0	0	0	0	0	0	0	0	0	0	0	0	0	0	0	0	0	0	0
Aldolase 2b y	0	0	0	0	0	0	0	0	0	0	0	0	0	0	0	0	0	0	0	0	0	0	0	0	0	0	0	0	0	0	0	0	0	0	0	0	0	0	0	0	0	0	0	0	0	0	0	0	0
Aldolase 3b y	0	0	0	0	0	0	0	0	0	0	0	0	0	0	0	0	0	0	0	0	0	0	0	0	0	0	0	0	0	0	0	0	0	0	0	0	0	0	0	0	0	0	0	0	0	0	0	0	0
Aldolase 3b y_rev	0	0	0	0	0	0	0	0	0	0	0	0	0	0	0	0	0	0	0	0	0	0	0	0	0	0	0	0	0	0	0	0	0	0	0	0	0	0	0	0	0	0	0	0	0	0	0	0	0
Aldolase 4b y	0	0	0	0	0	0	0	0	0	0	0	0	0	0	0	0	0	0	0	0	0	0	0	0	0	0	0	0	0	0	0	0	0	0	0	0	0	0	0	0	0	0	0	0	0	0	0	0	0
Sedoheptulose-1,7-phosphatase 1 y	0	0	0	0	0	0	0	0	0	0	0	0	0	0	0	0	0	0	0	0	0	0	0	0	0	0	0	0	0	0	0	0	0	0	0	0	0	0	0	0	0	0	0	0	0	0	0	0	0
Sedoheptulose-1,7-phosphatase 1 y_rev	0	0	0	0	0	0	0	0	0	0	0	0	0	0	0	0	0	0	0	0	0	0	0	0	0	0	0	0	0	0	0	0	0	0	0	0	0	0	0	0	0	0	0	0	0	0	0	0	0
Sedoheptulose-1,7-phosphatase 2 y	0	0	0	0	0	0	0	0	0	0	0	0	0	0	0	0	0	0	0	0	0	0	0	0	0	0	0	0	0	0	0	0	0	0	0	0	0	0	0	0	0	0	0	0	0	0	0	0	0
Transketolase 1b y	0	0	0	0	0	0	0	0	0	0	0	0	0	0	0	0	0	0	0	0	0	0	0	0	0	0	0	0	0	0	0	0	0	0	0	0	0	0	0	0	0	0	0	0	0	0	0	0	0
Transketolase 1b y_rev	0	0	0	0	0	0	0	0	0	0	0	0	0	0	0	0	0	0	0	0	0	0	0	0	0	0	0	0	0	0	0	0	0	0	0	0	0	0	0	0	0	0	0	0	0	0	0	0	0
Transketolase 2b y	0	0	0	0	0	0	0	0	0	0	0	0	0	0	0	0	0	0	0	0	0	0	0	0	0	0	0	0	0	0	0	0	0	0	0	0	0	0	0	0	0	0	0	0	0	0	0	0	0
Transketolase 3b y	0	0	0	0	0	0	0	0	0	0	0	0	0	0	0	0	0	0	0	0	0	0	0	0	0	0	0	0	0	0	0	0	0	0	0	0	0	0	0	0	0	0	0	0	0	0	0	0	0
Transketolase 3b y_rev	0	0	0	0	0	0	0	0	0	0	0	0	0	0	0	0	0	0	0	0	0	0	0	0	0	0	0	0	0	0	0	0	0	0	0	0	0	0	0	0	0	0	0	0	0	0	0	0	0
Transketolase 4b y	0	0	0	0	0	0	0	0	0	0	0	0	0	0	0	0	0	0	0	0	0	0	0	0	0	0	0	0	0	0	0	0	0	0	0	0	0	0	0	0	0	0	0	0	0	0	0	0	0
Ribulose-5-phosphate epimerase 1 y	0	0	0	0	0	0	0	0	0	0	0	0	0	0	0	0	0	0	0	0	0	0	0	0	0	0	0	0	0	0	0	0	0	0	0	0	0	0	0	0	0	0	0	0	0	0	0	0	0
Ribulose-5-phosphate epimerase 1 y_rev	0	0	0	0	0	0	0	0	0	0	0	0	0	0	0	0	0	0	0	0	0	0	0	0	0	0	0	0	0	0	0	0	0	0	0	0	0	0	0	0	0	0	0	0	0	0	0	0	0
Ribulose-5-phosphate epimerase 2 y	0	0	0	0	0	0	0	0	0	0	0	0	0	0	0	0	0	0	0	0	0	0	0	0	0	0	0	0	0	0	0	0	0	0	0	0	0	0	0	0	0	0	0	0	0	0	0	0	0
Ribulose-5-phosphate epimerase 3 y	0	0	0	0	0	0	0	0	0	0	0	0	0	0	0	0	0	0	0	0	0	0	0	0	0	0	0	0	0	0	0	0	0	0	0	0	0	0	0	0	0	0	0	0	0	0	0	0	0
Ribulose-5-phosphate epimerase 3 y_rev	0	0	0	0	0	0	0	0	0	0	0	0	0	0	0	0	0	0	0	0	0	0	0	0	0	0	0	0	0	0	0	0	0	0	0	0	0	0	0	0	0	0	0	0	0	0	0	0	0
Ribulose-5-phosphate epimerase 4 y	0	0	0	0	0	0	0	0	0	0	0	0	0	0	0	0	0	0	0	0	0	0	0	0	0	0	0	0	0	0	0	0	0	0	0	0	0	0	0	0	0	0	0	0	0	0	0	0	0
Ribose-5-phosphate isomerase 1 y	0	0	0	0	0	0	0	0	0	0	0	0	0	0	0	0	0	0	0	0	0	0	0	0	0	0	0	0	0	0	0	0	0	0	0	0	0	0	0	0	0	0	0	0	0	0	0	0	0
Ribose-5-phosphate isomerase 1 y_rev	0	0	0	0	0	0	0	0	0	0	0	0	0	0	0	0	0	0	0	0	0	0	0	0	0	0	0	0	0	0	0	0	0	0	0	0	0	0	0	0	0	0	0	0	0	0	0	0	0
Ribose-5-phosphate isomerase 2 y	0	0	0	0	0	0	0	0	0	0	0	0	0	0	0	0	0	0	0	0	0	0	0	0	0	0	0	0	0	0	0	0	0	0	0	0	0	0	0	0	0	0	0	0	0	0	0	0	0
Ribose-5-phosphate isomerase 3 y	0	0	0	0	0	0	0	0	0	0	0	0	0	0	0	0	0	0	0	0	0	0	0	0	0	0	0	0	0	0	0	0	0	0	0	0	0	0	0	0	0	0	0	0	0	0	0	0	0
Ribose-5-phosphate isomerase 3 y_rev	0	0	0	0	0	0	0	0	0	0	0	0	0	0	0	0	0	0	0	0	0	0	0	0	0	0	0	0	0	0	0	0	0	0	0	0	0	0	0	0	0	0	0	0	0	0	0	0	0
Ribose-5-phosphate isomerase 4 y	0	0	0	0	0	0	0	0	0	0	0	0	0	0	0	0	0	0	0	0	0	0	0	0	0	0	0	0	0	0	0	0	0	0	0	0	0	0	0	0	0	0	0	0	0	0	0	0	0
Phosphoribulokinase 1 y	0	0	0	0	0	0	0	0	0	0	0	0	0	0	0	0	0	0	0	0	0	0	0	0	0	0	0	0	0	0	0	0	0	0	0	0	0	0	0	0	0	0	0	0	0	0	0	0	0
Phosphoribulokinase 1 y_rev	0	0	0	0	0	0	0	0	0	0	0	0	0	0	0	0	0	0	0	0	0	0	0	0	0	0	0	0	0	0	0	0	0	0	0	0	0	0	0	0	0	0	0	0	0	0	0	0	0
Phosphoribulokinase 2 y	0	0	0	0	0	0	0	0	0	0	0	0	0	0	0	0	0	0	0	0	0	0	0	0	0	0	0	0	0	0	0	0	0	0	0	0	0	0	0	0	0	0	0	0	0	0	0	0	0
Phosphoglucoisomerase 1 y	0	0	0	0	0	0	0	0	0	0	0	0	0	0	0	0	0	0	0	0	0	0	0	0	0	0	0	0	0	0	0	0	0	0	0	0	0	0	0	0	0	0	0	0	0	0	0	0	0
Phosphoglucoisomerase 1 y_rev	0	0	0	0	0	0	0	0	0	0	0	0	0	0	0	0	0	0	0	0	0	0	0	0	0	0	0	0	0	0	0	0	0	0	0	0	0	0	0	0	0	0	0	0	0	0	0	0	0
Phosphoglucoisomerase 2 y	0	0	0	0	0	0	0	0	0	0	0	0	0	0	0	0	0	0	0	0	0	0	0	0	0	0	0	0	0	0	0	0	0	0	0	0	0	0	0	0	0	0	0	0	0	0	0	0	0
Phosphoglucoisomerase 3 y	0	0	0	0	0	0	0	0	0	0	0	0	0	0	0	0	0	0	0	0	0	0	0	0	0	0	0	0	0	0	0	0	0	0	0	0	0	0	0	0	0	0	0	0	0	0	0	0	0
Phosphoglucoisomerase 3 y_rev	0	0	0	0	0	0	0	0	0	0	0	0	0	0	0	0	0	0	0	0	0	0	0	0	0	0	0	0	0	0	0	0	0	0	0	0	0	0	0	0	0	0	0	0	0	0	0	0	0
Phosphoglucoisomerase 4 y	0	0	0	0	0	0	0	0	0	0	0	0	0	0	0	0	0	0	0	0	0	0	0	0	0	0	0	0	0	0	0	0	0	0	0	0	0	0	0	0	0	0	0	0	0	0	0	0	0
Phosphoglucomutase 1 y	0	0	0	0	0	0	0	0	0	0	0	0	0	0	0	0	0	0	0	0	0	0	0	0	0	0	0	0	0	0	0	0	0	0	0	0	0	0	0	0	0	0	0	0	0	0	0	0	0
Phosphoglucomutase 1 y_rev	0	0	0	0	0	0	0	0	0	0	0	0	0	0	0	0	0	0	0	0	0	0	0	0	0	0	0	0	0	0	0	0	0	0	0	0	0	0	0	0	0	0	0	0	0	0	0	0	0
Phosphoglucomutase 2 y	0	0	0	0	0	0	0	0	0	0	0	0	0	0	0	0	0	0	0	0	0	0	0	0	0	0	0	0	0	0	0	0	0	0	0	0	0	0	0	0	0	0	0	0	0	0	0	0	0
Phosphoglucomutase 3 y	0	0	0	0	0	0	0	0	0	0	0	0	0	0	0	0	0	0	0	0	0	0	0	0	0	0	0	0	0	0	0	0	0	0	0	0	0	0	0	0	0	0	0	0	0	0	0	0	0
Phosphoglucomutase 3 y_rev	0	0	0	0	0	0	0	0	0	0	0	0	0	0	0	0	0	0	0	0	0	0	0	0	0	0	0	0	0	0	0	0	0	0	0	0	0	0	0	0	0	0	0	0	0	0	0	0	0
Phosphoglucomutase 4 y	0	0	0	0	0	0	0	0	0	0	0	0	0	0	0	0	0	0	0	0	0	0	0	0	0	0	0	0	0	0	0	0	0	0	0	0	0	0	0	0	0	0	0	0	0	0	0	0	0
Glucose-1-phosphate adenylyltransferase 1 y	0	0	0	0	0	0	0	0	0	0	0	0	0	0	0	0	0	0	0	0	0	0	0	0	0	0	0	0	0	0	0	0	0	0	0	0	0	0	0	0	0	0	0	0	0	0	0	0	0
Glucose-1-phosphate adenylyltransferase 1 y_rev	0	0	0	0	0	0	0	0	0	0	0	0	0	0	0	0	0	0	0	0	0	0	0	0	0	0	0	0	0	0	0	0	0	0	0	0	0	0	0	0	0	0	0	0	0	0	0	0	0
Glucose-1-phosphate adenylyltransferase 2 y	0	0	0	0	0	0	0	0	0	0	0	0	0	0	0	0	0	0	0	0	0	0	0	0	0	0	0	0	0	0	0	0	0	0	0	0	0	0	0	0	0	0	0	0	0	0	0	0	0
Glucose-1-phosphate adenylyltransferase 3 y	0	0	0	0	0	0	0	0	0	0	0	0	0	0	0	0	0	0	0	0	0	0	0	0	0	0	0	0	0	0	0	0	0	0	0	0	0	0	0	0	0	0	0	0	0	0	0	0	0
Glucose-1-phosphate adenylyltransferase 3 y_rev	0	0	0	0	0	0	0	0	0	0	0	0	0	0	0	0	0	0	0	0	0	0	0	0	0	0	0	0	0	0	0	0	0	0	0	0	0	0	0	0	0	0	0	0	0	0	0	0	0
Glucose-1-phosphate adenylyltransferase 4 y	0	0	0	0	0	0	0	0	0	0	0	0	0	0	0	0	0	0	0	0	0	0	0	0	0	0	0	0	0	0	0	0	0	0	0	0	0	0	0	0	0	0	0	0	0	0	0	0	0
ADPGstore y	0	0	0	0	0	0	0	0	0	0	0	0	0	0	0	0	0	0	0	0	0	0	0	0	0	0	0	0	0	0	0	0	0	0	0	0	0	0	0	0	0	0	0	0	0	0	0	0	0
ADPGstore y_rev	0	0	0	0	0	0	0	0	0	0	0	0	0	0	0	0	0	0	0	0	0	0	0	0	0	0	0	0	0	0	0	0	0	0	0	0	0	0	0	0	0	0	0	0	0	0	0	0	0
Diffusion RuBP	544.376	264.7	843.557	928.473	489.209	311.409	698.336	215.475	862.882	981.797	774.803	883.041	898.827	764.231	567.019	868.992	304.642	860.088	359.852	654.688	102.47	639.582	904.487	298.316	640.739	335.117	970.163	275.204	899.923	989.131	276.424	494.049	912.877	237.53	767.231	723.194	174.023	776.203	923.903	619.103	702.924	700.287	416.336	526.15	776.158	201.541	718.043	853.124	128.586
Diffusion RuBP_rev	457.712	264.7	756.894	841.809	402.551	224.747	611.673	128.812	776.213	895.134	688.138	796.371	812.162	677.571	480.356	782.333	217.979	773.429	273.182	568.024	15.8048	552.924	817.824	211.658	554.079	248.454	883.503	188.542	813.253	902.467	189.756	407.379	826.215	150.862	680.563	636.528	87.363	689.543	837.233	532.432	616.258	613.628	329.673	439.487	689.499	114.882	631.383	766.466	41.9253
Diffusion 3PGA	418.633	238.82	343.26	684.875	597.966	564.553	585.247	401.739	37.9767	363.523	680.279	513.675	557.21	567.566	602.659	749.237	768.731	11.5495	514.48	746.208	824.989	418.461	273.394	554.936	389.334	366.391	503.784	154.968	387.745	491.498	29.8577	128.932	32.3378	74.6363	442.692	615.411	11.0396	146.436	690.767	439.088	185.777	480.943	541.289	5.71197	268.169	707.14	268.344	27.5814	161.386
Diffusion 3PGA_rev	591.96	238.821	516.587	858.204	771.282	737.877	758.572	575.065	211.314	536.85	853.611	687.015	730.541	740.887	775.985	922.554	942.057	184.868	687.819	919.537	998.319	591.777	446.72	728.253	562.653	539.716	677.103	328.292	561.086	664.826	203.194	302.273	205.662	247.973	616.029	788.743	184.359	319.757	864.107	612.428	359.108	654.259	714.615	179.038	441.486	880.458	441.666	200.898	334.708
Diffusion GAP	0	0	0	0	0	0	0	0	0	0	0	0	0	0	0	0	0	0	0	0	0	0	0	0	0	0	0	0	0	0	0	0	0	0	0	0	0	0	0	0	0	0	0	0	0	0	0	0	0
Diffusion GAP_rev	0	0	0	0	0	0	0	0	0	0	0	0	0	0	0	0	0	0	0	0	0	0	0	0	0	0	0	0	0	0	0	0	0	0	0	0	0	0	0	0	0	0	0	0	0	0	0	0	0
Diffusion DHAP	0	0	0	0	0	0	0	0	0	0	0	0	0	0	0	0	0	0	0	0	0	0	0	0	0	0	0	0	0	0	0	0	0	0	0	0	0	0	0	0	0	0	0	0	0	0	0	0	0
Diffusion DHAP_rev	0	0	0	0	0	0	0	0	0	0	0	0	0	0	0	0	0	0	0	0	0	0	0	0	0	0	0	0	0	0	0	0	0	0	0	0	0	0	0	0	0	0	0	0	0	0	0	0	0
Diffusion FBP	0	0	0	0	0	0	0	0	0	0	0	0	0	0	0	0	0	0	0	0	0	0	0	0	0	0	0	0	0	0	0	0	0	0	0	0	0	0	0	0	0	0	0	0	0	0	0	0	0
Diffusion FBP_rev	0	0	0	0	0	0	0	0	0	0	0	0	0	0	0	0	0	0	0	0	0	0	0	0	0	0	0	0	0	0	0	0	0	0	0	0	0	0	0	0	0	0	0	0	0	0	0	0	0
Diffusion F6P	0	0	0	0	0	0	0	0	0	0	0	0	0	0	0	0	0	0	0	0	0	0	0	0	0	0	0	0	0	0	0	0	0	0	0	0	0	0	0	0	0	0	0	0	0	0	0	0	0
Diffusion F6P_rev	0	0	0	0	0	0	0	0	0	0	0	0	0	0	0	0	0	0	0	0	0	0	0	0	0	0	0	0	0	0	0	0	0	0	0	0	0	0	0	0	0	0	0	0	0	0	0	0	0
Diffusion E4P	0	0	0	0	0	0	0	0	0	0	0	0	0	0	0	0	0	0	0	0	0	0	0	0	0	0	0	0	0	0	0	0	0	0	0	0	0	0	0	0	0	0	0	0	0	0	0	0	0
Diffusion E4P_rev	0	0	0	0	0	0	0	0	0	0	0	0	0	0	0	0	0	0	0	0	0	0	0	0	0	0	0	0	0	0	0	0	0	0	0	0	0	0	0	0	0	0	0	0	0	0	0	0	0
Diffusion Xu5P	0	0	0	0	0	0	0	0	0	0	0	0	0	0	0	0	0	0	0	0	0	0	0	0	0	0	0	0	0	0	0	0	0	0	0	0	0	0	0	0	0	0	0	0	0	0	0	0	0
Diffusion Xu5P_rev	0	0	0	0	0	0	0	0	0	0	0	0	0	0	0	0	0	0	0	0	0	0	0	0	0	0	0	0	0	0	0	0	0	0	0	0	0	0	0	0	0	0	0	0	0	0	0	0	0
Diffusion SBP	0	0	0	0	0	0	0	0	0	0	0	0	0	0	0	0	0	0	0	0	0	0	0	0	0	0	0	0	0	0	0	0	0	0	0	0	0	0	0	0	0	0	0	0	0	0	0	0	0
Diffusion SBP_rev	0	0	0	0	0	0	0	0	0	0	0	0	0	0	0	0	0	0	0	0	0	0	0	0	0	0	0	0	0	0	0	0	0	0	0	0	0	0	0	0	0	0	0	0	0	0	0	0	0
Diffusion S7P	0	0	0	0	0	0	0	0	0	0	0	0	0	0	0	0	0	0	0	0	0	0	0	0	0	0	0	0	0	0	0	0	0	0	0	0	0	0	0	0	0	0	0	0	0	0	0	0	0
Diffusion S7P_rev	0	0	0	0	0	0	0	0	0	0	0	0	0	0	0	0	0	0	0	0	0	0	0	0	0	0	0	0	0	0	0	0	0	0	0	0	0	0	0	0	0	0	0	0	0	0	0	0	0
Diffusion R5P	0	0	0	0	0	0	0	0	0	0	0	0	0	0	0	0	0	0	0	0	0	0	0	0	0	0	0	0	0	0	0	0	0	0	0	0	0	0	0	0	0	0	0	0	0	0	0	0	0
Diffusion R5P_rev	0	0	0	0	0	0	0	0	0	0	0	0	0	0	0	0	0	0	0	0	0	0	0	0	0	0	0	0	0	0	0	0	0	0	0	0	0	0	0	0	0	0	0	0	0	0	0	0	0
Diffusion Ru5P	0	0	0	0	0	0	0	0	0	0	0	0	0	0	0	0	0	0	0	0	0	0	0	0	0	0	0	0	0	0	0	0	0	0	0	0	0	0	0	0	0	0	0	0	0	0	0	0	0
Diffusion Ru5P_rev	0	0	0	0	0	0	0	0	0	0	0	0	0	0	0	0	0	0	0	0	0	0	0	0	0	0	0	0	0	0	0	0	0	0	0	0	0	0	0	0	0	0	0	0	0	0	0	0	0
Diffusion BPGA	0	0	0	0	0	0	0	0	0	0	0	0	0	0	0	0	0	0	0	0	0	0	0	0	0	0	0	0	0	0	0	0	0	0	0	0	0	0	0	0	0	0	0	0	0	0	0	0	0
Diffusion BPGA_rev	0	0	0	0	0	0	0	0	0	0	0	0	0	0	0	0	0	0	0	0	0	0	0	0	0	0	0	0	0	0	0	0	0	0	0	0	0	0	0	0	0	0	0	0	0	0	0	0	0
Diffusion G1P	0	0	0	0	0	0	0	0	0	0	0	0	0	0	0	0	0	0	0	0	0	0	0	0	0	0	0	0	0	0	0	0	0	0	0	0	0	0	0	0	0	0	0	0	0	0	0	0	0
Diffusion G1P_rev	0	0	0	0	0	0	0	0	0	0	0	0	0	0	0	0	0	0	0	0	0	0	0	0	0	0	0	0	0	0	0	0	0	0	0	0	0	0	0	0	0	0	0	0	0	0	0	0	0
Diffusion G6P	0	0	0	0	0	0	0	0	0	0	0	0	0	0	0	0	0	0	0	0	0	0	0	0	0	0	0	0	0	0	0	0	0	0	0	0	0	0	0	0	0	0	0	0	0	0	0	0	0
Diffusion G6P_rev	0	0	0	0	0	0	0	0	0	0	0	0	0	0	0	0	0	0	0	0	0	0	0	0	0	0	0	0	0	0	0	0	0	0	0	0	0	0	0	0	0	0	0	0	0	0	0	0	0
Diffusion ADPG	0	0	0	0	0	0	0	0	0	0	0	0	0	0	0	0	0	0	0	0	0	0	0	0	0	0	0	0	0	0	0	0	0	0	0	0	0	0	0	0	0	0	0	0	0	0	0	0	0
Diffusion ADPG_rev	0	0	0	0	0	0	0	0	0	0	0	0	0	0	0	0	0	0	0	0	0	0	0	0	0	0	0	0	0	0	0	0	0	0	0	0	0	0	0	0	0	0	0	0	0	0	0	0	0
FNR	796	0	796	796	796	796	796	796	796	796	796	796	796	796	796	796	796	796	796	796	796	796	796	796	796	796	796	796	796	796	796	796	796	796	796	796	796	796	796	796	796	796	796	796	796	796	796	796	796
ATPase	1194	0	1194	1194	1194	1194	1194	1194	1194	1194	1194	1194	1194	1194	1194	1194	1194	1194	1194	1194	1194	1194	1194	1194	1194	1194	1194	1194	1194	1194	1194	1194	1194	1194	1194	1194	1194	1194	1194	1194	1194	1194	1194	1194	1194	1194	1194	1194	1194
Diffusion ADP	0	0	0	0	0	0	0	0	0	0	0	0	0	0	0	0	0	0	0	0	0	0	0	0	0	0	0	0	0	0	0	0	0	0	0	0	0	0	0	0	0	0	0	0	0	0	0	0	0
Diffusion ADP_rev	0	0	0	0	0	0	0	0	0	0	0	0	0	0	0	0	0	0	0	0	0	0	0	0	0	0	0	0	0	0	0	0	0	0	0	0	0	0	0	0	0	0	0	0	0	0	0	0	0
Diffusion ATP	0	0	0	0	0	0	0	0	0	0	0	0	0	0	0	0	0	0	0	0	0	0	0	0	0	0	0	0	0	0	0	0	0	0	0	0	0	0	0	0	0	0	0	0	0	0	0	0	0
Diffusion ATP_rev	0	0	0	0	0	0	0	0	0	0	0	0	0	0	0	0	0	0	0	0	0	0	0	0	0	0	0	0	0	0	0	0	0	0	0	0	0	0	0	0	0	0	0	0	0	0	0	0	0
Diffusion NADP	0	0	0	0	0	0	0	0	0	0	0	0	0	0	0	0	0	0	0	0	0	0	0	0	0	0	0	0	0	0	0	0	0	0	0	0	0	0	0	0	0	0	0	0	0	0	0	0	0
Diffusion NADP_rev	0	0	0	0	0	0	0	0	0	0	0	0	0	0	0	0	0	0	0	0	0	0	0	0	0	0	0	0	0	0	0	0	0	0	0	0	0	0	0	0	0	0	0	0	0	0	0	0	0
Diffusion NADPH	0	0	0	0	0	0	0	0	0	0	0	0	0	0	0	0	0	0	0	0	0	0	0	0	0	0	0	0	0	0	0	0	0	0	0	0	0	0	0	0	0	0	0	0	0	0	0	0	0
Diffusion NADPH_rev	0	0	0	0	0	0	0	0	0	0	0	0	0	0	0	0	0	0	0	0	0	0	0	0	0	0	0	0	0	0	0	0	0	0	0	0	0	0	0	0	0	0	0	0	0	0	0	0	0
Diffusion DHAP s-c	449.627	265.181	763.298	157.754	487.432	135.576	907.743	66.8532	319.361	623.572	757.545	17.7925	606.239	504.332	31.6677	119.54	24.6142	311.379	111.29	345.246	601.204	599.424	846.101	659.572	494.409	958.67	238.456	545.863	616.445	605.836	321.258	258.296	368.259	747.027	238.082	109.964	479.009	558.054	15.0008	593.764	899.176	533.811	606.452	105.108	106.741	425.087	384.877	342.528	745.843
Diffusion DHAP s-c_rev	558.655	263.972	950.813	113.326	663.335	518.525	946.71	314.763	751.519	872.196	854.447	348.653	683.024	469.312	512.123	870.544	303.568	699.956	274.001	626.246	752.632	856.323	581.394	734.967	777.817	779.963	575.159	518.053	764.755	812.04	821.726	646.11	512.355	991.64	94.5353	316.26	529.429	373.865	809.429	833.505	962.88	452.381	532.752	402.997	426.385	384.338	642.31	530.61	611.567
Diffusion BPGA s-c	490.951	262.051	248.41	682.426	834.687	419.743	515.039	606.506	327.21	228.336	830.274	856.189	759.219	483.235	857.766	199.251	109.393	617.511	260.962	283.506	54.3489	87.2041	916.742	989.137	647.641	920.841	423.188	210.821	508.132	228.607	929.088	229.631	744.259	40.9161	620.162	532.772	496.553	49.6428	686.6	574.068	570.96	865.76	495.212	48.5763	894.176	319.089	465.206	288.907	650.889
Diffusion BPGA s-c_rev	539.504	263.579	287.945	671.499	717.908	408.075	477.662	567.364	360.361	270.15	810.308	755.545	732.572	567.364	883.844	297.389	323.288	707.066	294.523	255.98	153.01	299.702	863.001	944.177	581.157	880.047	449.611	208.146	519.902	277.324	980.129	331.141	742.406	60.4786	733.982	614.052	475.46	113.377	899.045	582.079	789.287	737.464	404.01	15.4706	968.44	443.514	529.462	505.377	642.506
Diffusion GAP s-c	566.31	266.395	760.214	658.526	649.92	624.433	959.944	810.99	682.596	431.836	389.623	771.351	355.249	807.304	940.822	925.824	843.732	693.304	985.531	897.514	593.918	873.127	532.642	724.935	791.821	177.514	457.032	508.265	500.882	593.871	805.308	898.929	753.626	430.89	730.759	188.212	733.237	43.9369	931.98	479.906	581.869	911.777	364.077	520.297	458.681	349.509	902.342	216.878	324.773
Diffusion GAP s-c_rev	421.721	260.333	519.102	548.433	107.793	85.4821	713.556	352.13	184.073	134.173	120.123	106.536	92.5053	877.913	379.857	238.431	859.9	351.171	757.276	428.797	507.146	908.556	557.199	426.953	242.778	141.966	40.5075	398.06	243.447	352.435	274.253	581.47	473.159	92.7358	969.28	11.808	507.964	222.929	429.774	123.52	822.153	603.948	122.707	23.5301	154.899	506.442	640.755	329.068	309.616
Diffusion 3PGA s-c	523.626	264.513	688.947	187.463	228.179	389.238	638.409	329.72	805.106	465.183	151.102	121.268	690.627	751.867	494.217	438.685	216.322	218.846	477.351	857.89	153.722	212.967	269.562	862.408	749.494	446.881	316.919	623.585	938.834	404.753	360.187	820.879	131.477	139.837	882.989	788.888	688.2	390.325	373.942	867.469	365.573	110.855	816.751	790.668	724.03	242.168	999.209	852.512	292.44
Diffusion 3PGA s-c_rev	475.073	268.21	649.413	198.39	344.958	400.906	675.786	368.862	771.955	423.369	171.067	221.912	717.273	667.739	468.139	340.547	2.42752	129.291	443.79	885.416	55.0613	0.468898	323.304	907.368	815.978	487.675	290.497	626.259	927.064	356.036	309.146	719.369	133.329	120.275	769.169	707.609	709.294	326.59	161.498	859.459	147.246	239.15	907.953	823.773	649.766	117.743	934.953	636.043	300.822
[truncated: 953 more columns]

## Sheet: D_net flux
Supplementary Table 5D. Net flux through model reactions in µM/s for the 1,000 sampled flux distributions (see Supplementary Table 5C).
reaction	average	standard deviation	SAMPLE 1	SAMPLE 2	SAMPLE 3	SAMPLE 4	SAMPLE 5	SAMPLE 6	SAMPLE 7	SAMPLE 8	SAMPLE 9	SAMPLE 10	SAMPLE 11	SAMPLE 12	SAMPLE 13	SAMPLE 14	SAMPLE 15	SAMPLE 16	SAMPLE 17	SAMPLE 18	SAMPLE 19	SAMPLE 20	SAMPLE 21	SAMPLE 22	SAMPLE 23	SAMPLE 24	SAMPLE 25	SAMPLE 26	SAMPLE 27	SAMPLE 28	SAMPLE 29	SAMPLE 30	SAMPLE 31	SAMPLE 32	SAMPLE 33	SAMPLE 34	SAMPLE 35	SAMPLE 36	SAMPLE 37	SAMPLE 38	SAMPLE 39	SAMPLE 40	SAMPLE 41	SAMPLE 42	SAMPLE 43	SAMPLE 44	SAMPLE 45	SAMPLE 46	SAMPLE 47
Diffusion CO2 c-s	398	0	398	398	398	398	398	398	398	398	398	398	398	398	398	398	398	398	398	398	398	398	398	398	398	398	398	398	398	398	398	398	398	398	398	398	398	398	398	398	398	398	398	398	398	398	398	398	398
Diffusion CO2 s-y	86.6637	0.00353551	86.6636	86.6644	86.6582	86.662	86.6627	86.6628	86.6687	86.6632	86.6659	86.6701	86.6653	86.6604	86.6628	86.6585	86.663	86.6594	86.6694	86.6646	86.6652	86.6582	86.6626	86.6586	86.6594	86.6626	86.6599	86.6619	86.6701	86.6644	86.6679	86.6703	86.6621	86.6683	86.6683	86.6659	86.6599	86.6607	86.6697	86.6701	86.6656	86.6582	86.6628	86.6632	86.6586	86.6586	86.6606	86.6582	86.661
Rubisco carboxylase 2 s	311.336	0.00353551	311.336	311.336	311.342	311.338	311.337	311.337	311.331	311.337	311.334	311.33	311.335	311.34	311.337	311.342	311.337	311.341	311.331	311.335	311.335	311.342	311.337	311.341	311.341	311.337	311.34	311.338	311.33	311.336	311.332	311.33	311.338	311.332	311.332	311.334	311.34	311.339	311.33	311.33	311.334	311.342	311.337	311.337	311.341	311.341	311.339	311.342	311.339
Phosphoglycerate kinase 2 s	747.447	86.4976	756.465	806.927	912.779	807.668	833.377	835.142	762.849	754.186	815.965	896.644	822.646	711.872	769.921	697.862	582.106	706.445	762.439	823.526	697.339	583.502	849.742	840.96	862.484	836.794	769.577	798.674	784.23	747.283	744.96	694.49	797.852	776.438	682.18	714.721	817.094	732.266	583.555	787.99	577.673	924.296	887.202	829.106	721.736	671.575	731.744	579.531	804.383
Glyceraldehyde-3-phosphate dehydrogenase 2 s	796	8.65289e-11	796	796	796	796	796	796	796	796	796	796	796	796	796	796	796	796	796	796	796	796	796	796	796	796	796	796	796	796	796	796	796	796	796	796	796	796	796	796	796	796	796	796	796	796	796	796	796
Triosephosphate isomerase 2 s	204.858	219.059	117.353	298.833	-27.3482	-129.283	188.989	-21.7179	-133.674	58.5235	148.466	-166.171	161.903	384.481	-189.044	-387.532	200.274	-33.6882	136.183	-43.1919	212.567	220.932	476.298	144.978	-84.5587	403.246	-44.9472	290.469	128.794	107.847	-184.095	-20.9698	119.385	40.2832	522.7	140.317	193.82	513.258	-316.65	33.6028	419.957	218.467	247.832	-65.661	19.9533	430.507	72.1567	293.721	391.226
Aldolase 2a s	181.22	86.4976	172.201	121.739	15.8878	120.999	95.2895	93.5248	165.817	174.481	112.701	32.0229	106.02	216.795	158.745	230.805	346.561	222.222	166.228	105.141	231.328	345.164	78.925	87.7068	66.1829	91.8731	159.089	129.992	144.437	181.384	183.707	234.177	130.814	152.229	246.487	213.946	111.573	196.401	345.111	140.677	350.994	4.37082	41.4646	99.561	206.931	257.092	196.923	349.136	124.284
Fructose-1,6-bisphosphatase 2 s	181.22	86.4976	172.201	121.739	15.8878	120.999	95.2895	93.5248	165.817	174.481	112.701	32.0229	106.02	216.795	158.745	230.805	346.561	222.222	166.228	105.141	231.328	345.164	78.925	87.7068	66.1829	91.8731	159.089	129.992	144.437	181.384	183.707	234.177	130.814	152.229	246.487	213.946	111.573	196.401	345.111	140.677	350.994	4.37082	41.4646	99.561	206.931	257.092	196.923	349.136	124.284
Transketolase 2a s	132.667	6.29607e-11	132.667	132.667	132.667	132.667	132.667	132.667	132.667	132.667	132.667	132.667	132.667	132.667	132.667	132.667	132.667	132.667	132.667	132.667	132.667	132.667	132.667	132.667	132.667	132.667	132.667	132.667	132.667	132.667	132.667	132.667	132.667	132.667	132.667	132.667	132.667	132.667	132.667	132.667	132.667	132.667	132.667	132.667	132.667	132.667	132.667	132.667	132.667
Aldolase 2b s	132.667	5.92378e-11	132.667	132.667	132.667	132.667	132.667	132.667	132.667	132.667	132.667	132.667	132.667	132.667	132.667	132.667	132.667	132.667	132.667	132.667	132.667	132.667	132.667	132.667	132.667	132.667	132.667	132.667	132.667	132.667	132.667	132.667	132.667	132.667	132.667	132.667	132.667	132.667	132.667	132.667	132.667	132.667	132.667	132.667	132.667	132.667	132.667	132.667	132.667
Sedoheptulose-1,7-phosphatase 2 s	132.667	1.59241e-12	132.667	132.667	132.667	132.667	132.667	132.667	132.667	132.667	132.667	132.667	132.667	132.667	132.667	132.667	132.667	132.667	132.667	132.667	132.667	132.667	132.667	132.667	132.667	132.667	132.667	132.667	132.667	132.667	132.667	132.667	132.667	132.667	132.667	132.667	132.667	132.667	132.667	132.667	132.667	132.667	132.667	132.667	132.667	132.667	132.667	132.667	132.667
Transketolase 2b s	132.667	7.00084e-11	132.667	132.667	132.667	132.667	132.667	132.667	132.667	132.667	132.667	132.667	132.667	132.667	132.667	132.667	132.667	132.667	132.667	132.667	132.667	132.667	132.667	132.667	132.667	132.667	132.667	132.667	132.667	132.667	132.667	132.667	132.667	132.667	132.667	132.667	132.667	132.667	132.667	132.667	132.667	132.667	132.667	132.667	132.667	132.667	132.667	132.667	132.667
Ribulose-5-phosphate epimerase 2 s	265.333	5.77611e-11	265.333	265.333	265.333	265.333	265.333	265.333	265.333	265.333	265.333	265.333	265.333	265.333	265.333	265.333	265.333	265.333	265.333	265.333	265.333	265.333	265.333	265.333	265.333	265.333	265.333	265.333	265.333	265.333	265.333	265.333	265.333	265.333	265.333	265.333	265.333	265.333	265.333	265.333	265.333	265.333	265.333	265.333	265.333	265.333	265.333	265.333	265.333
Ribose-5-phosphate isomerase 2 s	132.667	7.15417e-11	132.667	132.667	132.667	132.667	132.667	132.667	132.667	132.667	132.667	132.667	132.667	132.667	132.667	132.667	132.667	132.667	132.667	132.667	132.667	132.667	132.667	132.667	132.667	132.667	132.667	132.667	132.667	132.667	132.667	132.667	132.667	132.667	132.667	132.667	132.667	132.667	132.667	132.667	132.667	132.667	132.667	132.667	132.667	132.667	132.667	132.667	132.667
Phosphoribulokinase 2 s	398	0	398	398	398	398	398	398	398	398	398	398	398	398	398	398	398	398	398	398	398	398	398	398	398	398	398	398	398	398	398	398	398	398	398	398	398	398	398	398	398	398	398	398	398	398	398	398	398
Phosphoglucoisomerase 2 s	48.5533	86.4976	39.5347	-10.9272	-116.779	-11.6678	-37.3772	-39.1418	33.1506	41.814	-19.9653	-100.644	-26.6463	84.1282	26.0787	98.1385	213.894	89.5551	33.5612	-27.5256	98.6612	212.498	-53.7417	-44.9599	-66.4837	-40.7935	26.4226	-2.67441	11.7703	48.7169	51.0404	101.51	-1.85246	19.5625	113.82	81.2793	-21.0935	63.7345	212.445	8.01033	218.327	-128.296	-91.2021	-33.1056	74.2642	124.425	64.2564	216.469	-8.38284
Phosphoglucomutase 2 s	48.5533	86.4976	39.5347	-10.9272	-116.779	-11.6678	-37.3772	-39.1418	33.1506	41.814	-19.9653	-100.644	-26.6463	84.1282	26.0787	98.1385	213.894	89.5551	33.5612	-27.5256	98.6612	212.498	-53.7417	-44.9599	-66.4837	-40.7935	26.4226	-2.67441	11.7703	48.7169	51.0404	101.51	-1.85246	19.5625	113.82	81.2793	-21.0935	63.7345	212.445	8.01033	218.327	-128.296	-91.2021	-33.1056	74.2642	124.425	64.2564	216.469	-8.38284
Glucose-1-phosphate adenylyltransferase 2 s	48.5533	86.4976	39.5347	-10.9272	-116.779	-11.6678	-37.3772	-39.1418	33.1506	41.814	-19.9653	-100.644	-26.6463	84.1282	26.0787	98.1385	213.894	89.5551	33.5612	-27.5256	98.6612	212.498	-53.7417	-44.9599	-66.4837	-40.7935	26.4226	-2.67441	11.7703	48.7169	51.0404	101.51	-1.85246	19.5625	113.82	81.2793	-21.0935	63.7345	212.445	8.01033	218.327	-128.296	-91.2021	-33.1056	74.2642	124.425	64.2564	216.469	-8.38284
ADPGstore s	48.5533	86.4976	39.5347	-10.9272	-116.779	-11.6678	-37.3772	-39.1418	33.1506	41.814	-19.9653	-100.644	-26.6463	84.1282	26.0787	98.1385	213.894	89.5551	33.5612	-27.5256	98.6612	212.498	-53.7417	-44.9599	-66.4837	-40.7935	26.4226	-2.67441	11.7703	48.7169	51.0404	101.51	-1.85246	19.5625	113.82	81.2793	-21.0935	63.7345	212.445	8.01033	218.327	-128.296	-91.2021	-33.1056	74.2642	124.425	64.2564	216.469	-8.38284
Rubisco carboxylase 2 y	86.6637	0.00353551	86.6636	86.6644	86.6582	86.662	86.6627	86.6628	86.6687	86.6632	86.6659	86.6701	86.6653	86.6604	86.6628	86.6585	86.663	86.6594	86.6694	86.6646	86.6652	86.6582	86.6626	86.6586	86.6594	86.6626	86.6599	86.6619	86.6701	86.6644	86.6679	86.6703	86.6621	86.6683	86.6683	86.6659	86.6599	86.6607	86.6697	86.6701	86.6656	86.6582	86.6628	86.6632	86.6586	86.6586	86.6606	86.6582	86.661
Phosphoglycerate kinase 2 y	0	0	0	0	0	0	0	0	0	0	0	0	0	0	0	0	0	0	0	0	0	0	0	0	0	0	0	0	0	0	0	0	0	0	0	0	0	0	0	0	0	0	0	0	0	0	0	0	0
Glyceraldehyde-3-phosphate dehydrogenase 2 y	0	0	0	0	0	0	0	0	0	0	0	0	0	0	0	0	0	0	0	0	0	0	0	0	0	0	0	0	0	0	0	0	0	0	0	0	0	0	0	0	0	0	0	0	0	0	0	0	0
Triosephosphate isomerase 2 y	0	0	0	0	0	0	0	0	0	0	0	0	0	0	0	0	0	0	0	0	0	0	0	0	0	0	0	0	0	0	0	0	0	0	0	0	0	0	0	0	0	0	0	0	0	0	0	0	0
Aldolase 2a y	0	0	0	0	0	0	0	0	0	0	0	0	0	0	0	0	0	0	0	0	0	0	0	0	0	0	0	0	0	0	0	0	0	0	0	0	0	0	0	0	0	0	0	0	0	0	0	0	0
Fructose-1,6-bisphosphatase 2 y	0	0	0	0	0	0	0	0	0	0	0	0	0	0	0	0	0	0	0	0	0	0	0	0	0	0	0	0	0	0	0	0	0	0	0	0	0	0	0	0	0	0	0	0	0	0	0	0	0
Transketolase 2a y	0	0	0	0	0	0	0	0	0	0	0	0	0	0	0	0	0	0	0	0	0	0	0	0	0	0	0	0	0	0	0	0	0	0	0	0	0	0	0	0	0	0	0	0	0	0	0	0	0
Aldolase 2b y	0	0	0	0	0	0	0	0	0	0	0	0	0	0	0	0	0	0	0	0	0	0	0	0	0	0	0	0	0	0	0	0	0	0	0	0	0	0	0	0	0	0	0	0	0	0	0	0	0
Sedoheptulose-1,7-phosphatase 2 y	0	0	0	0	0	0	0	0	0	0	0	0	0	0	0	0	0	0	0	0	0	0	0	0	0	0	0	0	0	0	0	0	0	0	0	0	0	0	0	0	0	0	0	0	0	0	0	0	0
Transketolase 2b y	0	0	0	0	0	0	0	0	0	0	0	0	0	0	0	0	0	0	0	0	0	0	0	0	0	0	0	0	0	0	0	0	0	0	0	0	0	0	0	0	0	0	0	0	0	0	0	0	0
Ribulose-5-phosphate epimerase 2 y	0	0	0	0	0	0	0	0	0	0	0	0	0	0	0	0	0	0	0	0	0	0	0	0	0	0	0	0	0	0	0	0	0	0	0	0	0	0	0	0	0	0	0	0	0	0	0	0	0
Ribose-5-phosphate isomerase 2 y	0	0	0	0	0	0	0	0	0	0	0	0	0	0	0	0	0	0	0	0	0	0	0	0	0	0	0	0	0	0	0	0	0	0	0	0	0	0	0	0	0	0	0	0	0	0	0	0	0
Phosphoribulokinase 2 y	0	0	0	0	0	0	0	0	0	0	0	0	0	0	0	0	0	0	0	0	0	0	0	0	0	0	0	0	0	0	0	0	0	0	0	0	0	0	0	0	0	0	0	0	0	0	0	0	0
Phosphoglucoisomerase 2 y	0	0	0	0	0	0	0	0	0	0	0	0	0	0	0	0	0	0	0	0	0	0	0	0	0	0	0	0	0	0	0	0	0	0	0	0	0	0	0	0	0	0	0	0	0	0	0	0	0
Phosphoglucomutase 2 y	0	0	0	0	0	0	0	0	0	0	0	0	0	0	0	0	0	0	0	0	0	0	0	0	0	0	0	0	0	0	0	0	0	0	0	0	0	0	0	0	0	0	0	0	0	0	0	0	0
Glucose-1-phosphate adenylyltransferase 2 y	0	0	0	0	0	0	0	0	0	0	0	0	0	0	0	0	0	0	0	0	0	0	0	0	0	0	0	0	0	0	0	0	0	0	0	0	0	0	0	0	0	0	0	0	0	0	0	0	0
ADPGstore y	0	0	0	0	0	0	0	0	0	0	0	0	0	0	0	0	0	0	0	0	0	0	0	0	0	0	0	0	0	0	0	0	0	0	0	0	0	0	0	0	0	0	0	0	0	0	0	0	0
Diffusion RuBP	86.6637	0.00353551	86.6636	86.6644	86.6582	86.662	86.6627	86.6628	86.6687	86.6632	86.6659	86.6701	86.6653	86.6604	86.6628	86.6585	86.663	86.6594	86.6694	86.6646	86.6652	86.6582	86.6626	86.6586	86.6594	86.6626	86.6599	86.6619	86.6701	86.6644	86.6679	86.6703	86.6621	86.6683	86.6683	86.6659	86.6599	86.6607	86.6697	86.6701	86.6656	86.6582	86.6628	86.6632	86.6586	86.6586	86.6606	86.6582	86.661
Diffusion 3PGA	-173.327	0.00707103	-173.327	-173.329	-173.316	-173.324	-173.325	-173.326	-173.337	-173.326	-173.332	-173.34	-173.331	-173.321	-173.326	-173.317	-173.326	-173.319	-173.339	-173.329	-173.33	-173.316	-173.325	-173.317	-173.319	-173.325	-173.32	-173.324	-173.34	-173.329	-173.336	-173.341	-173.324	-173.337	-173.337	-173.332	-173.32	-173.321	-173.339	-173.34	-173.331	-173.316	-173.326	-173.326	-173.317	-173.317	-173.321	-173.316	-173.322
Diffusion GAP	0	0	0	0	0	0	0	0	0	0	0	0	0	0	0	0	0	0	0	0	0	0	0	0	0	0	0	0	0	0	0	0	0	0	0	0	0	0	0	0	0	0	0	0	0	0	0	0	0
Diffusion DHAP	0	0	0	0	0	0	0	0	0	0	0	0	0	0	0	0	0	0	0	0	0	0	0	0	0	0	0	0	0	0	0	0	0	0	0	0	0	0	0	0	0	0	0	0	0	0	0	0	0
Diffusion FBP	0	0	0	0	0	0	0	0	0	0	0	0	0	0	0	0	0	0	0	0	0	0	0	0	0	0	0	0	0	0	0	0	0	0	0	0	0	0	0	0	0	0	0	0	0	0	0	0	0
Diffusion F6P	0	0	0	0	0	0	0	0	0	0	0	0	0	0	0	0	0	0	0	0	0	0	0	0	0	0	0	0	0	0	0	0	0	0	0	0	0	0	0	0	0	0	0	0	0	0	0	0	0
Diffusion E4P	0	0	0	0	0	0	0	0	0	0	0	0	0	0	0	0	0	0	0	0	0	0	0	0	0	0	0	0	0	0	0	0	0	0	0	0	0	0	0	0	0	0	0	0	0	0	0	0	0
Diffusion Xu5P	0	0	0	0	0	0	0	0	0	0	0	0	0	0	0	0	0	0	0	0	0	0	0	0	0	0	0	0	0	0	0	0	0	0	0	0	0	0	0	0	0	0	0	0	0	0	0	0	0
Diffusion SBP	0	0	0	0	0	0	0	0	0	0	0	0	0	0	0	0	0	0	0	0	0	0	0	0	0	0	0	0	0	0	0	0	0	0	0	0	0	0	0	0	0	0	0	0	0	0	0	0	0
Diffusion S7P	0	0	0	0	0	0	0	0	0	0	0	0	0	0	0	0	0	0	0	0	0	0	0	0	0	0	0	0	0	0	0	0	0	0	0	0	0	0	0	0	0	0	0	0	0	0	0	0	0
Diffusion R5P	0	0	0	0	0	0	0	0	0	0	0	0	0	0	0	0	0	0	0	0	0	0	0	0	0	0	0	0	0	0	0	0	0	0	0	0	0	0	0	0	0	0	0	0	0	0	0	0	0
Diffusion Ru5P	0	0	0	0	0	0	0	0	0	0	0	0	0	0	0	0	0	0	0	0	0	0	0	0	0	0	0	0	0	0	0	0	0	0	0	0	0	0	0	0	0	0	0	0	0	0	0	0	0
Diffusion BPGA	0	0	0	0	0	0	0	0	0	0	0	0	0	0	0	0	0	0	0	0	0	0	0	0	0	0	0	0	0	0	0	0	0	0	0	0	0	0	0	0	0	0	0	0	0	0	0	0	0
Diffusion G1P	0	0	0	0	0	0	0	0	0	0	0	0	0	0	0	0	0	0	0	0	0	0	0	0	0	0	0	0	0	0	0	0	0	0	0	0	0	0	0	0	0	0	0	0	0	0	0	0	0
Diffusion G6P	0	0	0	0	0	0	0	0	0	0	0	0	0	0	0	0	0	0	0	0	0	0	0	0	0	0	0	0	0	0	0	0	0	0	0	0	0	0	0	0	0	0	0	0	0	0	0	0	0
Diffusion ADPG	0	0	0	0	0	0	0	0	0	0	0	0	0	0	0	0	0	0	0	0	0	0	0	0	0	0	0	0	0	0	0	0	0	0	0	0	0	0	0	0	0	0	0	0	0	0	0	0	0
FNR	796	0	796	796	796	796	796	796	796	796	796	796	796	796	796	796	796	796	796	796	796	796	796	796	796	796	796	796	796	796	796	796	796	796	796	796	796	796	796	796	796	796	796	796	796	796	796	796	796
ATPase	1194	0	1194	1194	1194	1194	1194	1194	1194	1194	1194	1194	1194	1194	1194	1194	1194	1194	1194	1194	1194	1194	1194	1194	1194	1194	1194	1194	1194	1194	1194	1194	1194	1194	1194	1194	1194	1194	1194	1194	1194	1194	1194	1194	1194	1194	1194	1194	1194
Diffusion ADP	0	0	0	0	0	0	0	0	0	0	0	0	0	0	0	0	0	0	0	0	0	0	0	0	0	0	0	0	0	0	0	0	0	0	0	0	0	0	0	0	0	0	0	0	0	0	0	0	0
Diffusion ATP	0	0	0	0	0	0	0	0	0	0	0	0	0	0	0	0	0	0	0	0	0	0	0	0	0	0	0	0	0	0	0	0	0	0	0	0	0	0	0	0	0	0	0	0	0	0	0	0	0
Diffusion NADP	0	0	0	0	0	0	0	0	0	0	0	0	0	0	0	0	0	0	0	0	0	0	0	0	0	0	0	0	0	0	0	0	0	0	0	0	0	0	0	0	0	0	0	0	0	0	0	0	0
Diffusion NADPH	0	0	0	0	0	0	0	0	0	0	0	0	0	0	0	0	0	0	0	0	0	0	0	0	0	0	0	0	0	0	0	0	0	0	0	0	0	0	0	0	0	0	0	0	0	0	0	0	0
Diffusion DHAP s-c	-109.028	233.863	-187.515	44.4272	-175.903	-382.949	-38.9674	-247.909	-432.157	-248.624	-96.9022	-330.861	-76.7844	35.0199	-480.456	-751.004	-278.954	-388.577	-162.711	-281	-151.428	-256.899	264.706	-75.3952	-283.408	178.706	-336.703	27.8103	-148.309	-206.204	-500.469	-387.813	-144.096	-244.613	143.547	-206.296	-50.4194	184.19	-794.428	-239.741	-63.7037	81.4297	73.7007	-297.889	-319.644	40.7488	-257.433	-188.082	134.275
Diffusion BPGA s-c	-48.5533	86.4976	-39.5347	10.9272	116.779	11.6678	37.3772	39.1418	-33.1506	-41.814	19.9653	100.644	26.6463	-84.1282	-26.0787	-98.1385	-213.894	-89.5551	-33.5612	27.5256	-98.6612	-212.498	53.7417	44.9599	66.4837	40.7935	-26.4226	2.67441	-11.7703	-48.7169	-51.0404	-101.51	1.85246	-19.5625	-113.82	-81.2793	21.0935	-63.7345	-212.445	-8.01033	-218.327	128.296	91.2021	33.1056	-74.2642	-124.425	-64.2564	-216.469	8.38284
Diffusion GAP s-c	144.589	237.161	241.112	110.094	542.127	538.951	246.388	458.86	498.523	297.663	269.499	664.815	262.744	-70.6095	560.965	687.394	-16.1686	342.133	228.255	468.717	86.7722	-35.4297	-24.5564	297.982	549.042	35.5475	416.525	110.205	257.435	241.436	531.055	317.46	280.467	338.154	-238.52	176.404	225.273	-178.992	502.205	356.387	-240.284	307.829	241.37	496.767	303.782	-156.933	261.587	-112.19	15.1571
Diffusion 3PGA s-c	48.5533	86.4976	39.5347	-10.9272	-116.779	-11.6678	-37.3772	-39.1418	33.1506	41.814	-19.9653	-100.644	-26.6463	84.1282	26.0787	98.1385	213.894	89.5551	33.5612	-27.5256	98.6612	212.498	-53.7417	-44.9599	-66.4837	-40.7935	26.4226	-2.67441	11.7703	48.7169	51.0404	101.51	-1.85246	19.5625	113.82	81.2793	-21.0935	63.7345	212.445	8.01033	218.327	-128.296	-91.2021	-33.1056	74.2642	124.425	64.2564	216.469	-8.38284
Ratio flux RuBP / free RuBP	1403.75
Ratio flux 3PGA / free 3PGA	-0.31801
[truncated: 953 more columns]

## Sheet: E_rate constants
Supplementary Table 5E. Reaction rate constants for 1,000 samples. For further information on reaction names see Supplementary file 3.
reaction	average	standard deviation	unit	SAMPLE 1	SAMPLE 2	SAMPLE 3	SAMPLE 4	SAMPLE 5	SAMPLE 6	SAMPLE 7	SAMPLE 8	SAMPLE 9	SAMPLE 10	SAMPLE 11	SAMPLE 12	SAMPLE 13	SAMPLE 14	SAMPLE 15	SAMPLE 16	SAMPLE 17	SAMPLE 18	SAMPLE 19	SAMPLE 20	SAMPLE 21	SAMPLE 22	SAMPLE 23	SAMPLE 24	SAMPLE 25	SAMPLE 26	SAMPLE 27	SAMPLE 28	SAMPLE 29	SAMPLE 30	SAMPLE 31	SAMPLE 32	SAMPLE 33	SAMPLE 34	SAMPLE 35	SAMPLE 36	SAMPLE 37	SAMPLE 38	SAMPLE 39	SAMPLE 40	SAMPLE 41	SAMPLE 42	SAMPLE 43	SAMPLE 44	SAMPLE 45	SAMPLE 46
Diffusion CO2 c-s	398	0	µmol·L−1·s−1	398	398	398	398	398	398	398	398	398	398	398	398	398	398	398	398	398	398	398	398	398	398	398	398	398	398	398	398	398	398	398	398	398	398	398	398	398	398	398	398	398	398	398	398	398	398
Diffusion CO2 c-s_rev	0	0	s−1	0	0	0	0	0	0	0	0	0	0	0	0	0	0	0	0	0	0	0	0	0	0	0	0	0	0	0	0	0	0	0	0	0	0	0	0	0	0	0	0	0	0	0	0	0	0
Diffusion CO2 s-y	9990.71	91.1138	s−1	10000	10000	10000	10000	10000	10000	10000	10000	10000	10000	10000	10000	10000	10000	10000	10000	10000	10000	10000	10000	10000	10000	10000	10000	10000	10000	10000	10000	10000	9279.06	10000	10000	10000	10000	10000	10000	10000	10000	10000	10000	10000	10000	10000	10000	10000	10000
Diffusion CO2 s-y_rev	9473.78	1805.41	s−1	10000	10000	10000	10000	10000	10000	10000	10000	10000	10000	9302.08	10000	10000	10000	10000	10000	10000	10000	10000	10000	10000	10000	10000	10000	10000	10000	10000	10000	10000	612.028	10000	10000	10000	10000	10000	10000	10000	10000	10000	10000	10000	10000	10000	10000	10000	10000
Rubisco carboxylase 1 s	10000	0	L2·mol−2·s−1	10000	10000	10000	10000	10000	10000	10000	10000	10000	10000	10000	10000	10000	10000	10000	10000	10000	10000	10000	10000	10000	10000	10000	10000	10000	10000	10000	10000	10000	10000	10000	10000	10000	10000	10000	10000	10000	10000	10000	10000	10000	10000	10000	10000	10000	10000
Rubisco carboxylase 1 s_rev	6.53488	3.68846	s−1	7.32473	6.7022	7.08301	10.1181	3.57446	10.9	10.0924	9.62453	4.64766	9.47428	6.0244	12.6381	10.1917	3.19536	9.63851	8.57858	2.39674	0.594571	1.54953	5.81611	5.71934	12.6678	7.98091	4.66368	5.85992	0.329849	10.1112	9.43671	11.1766	11.4183	5.64908	5.20425	2.0085	0.141357	5.07784	7.90233	9.40788	12.032	0.48568	3.47632	12.649	8.42797	5.29866	11.2467	2.55568	12.1074
Rubisco carboxylase 2 s	5.8	1.06635e-13	s−1	5.8	5.8	5.8	5.8	5.8	5.8	5.8	5.8	5.8	5.8	5.8	5.8	5.8	5.8	5.8	5.8	5.8	5.8	5.8	5.8	5.8	5.8	5.8	5.8	5.8	5.8	5.8	5.8	5.8	5.8	5.8	5.8	5.8	5.8	5.8	5.8	5.8	5.8	5.8	5.8	5.8	5.8	5.8	5.8	5.8	5.8
Phosphoglycerate kinase 1 s	1239.59	1107.61	L2·mol−2·s−1	1019.46	2897.05	1179	1637.34	944.846	10000	1261.7	3593.84	897.166	1272.97	1144.39	1173.88	888.631	1100.41	182.25	1042.31	664.74	894.951	968.293	747.984	3557.88	949.52	1939.11	1280.37	1123	1258.57	965.449	201.825	2287.48	750.203	3059.03	2655.1	438.004	116.354	854.695	884.554	706.827	1188.78	264.187	1264.92	2802.68	895.062	1811.64	1118.04	1185.21	315.326
Phosphoglycerate kinase 1 s_rev	9.7212	9.11144	s−1	18.5546	0.694366	3.90219	7.20876	1.29828	11.4813	8.7633	19.678	2.24973	1.8333	5.39211	1.90634	17.5832	6.70607	15.5879	12.2584	7.10412	1.28317	10.3473	6.20514	1.33899	4.96115	0.255864	6.80957	4.08271	4.85523	17.0014	1.90013	13.6229	21.4422	8.26936	0.455622	10.3379	6.96476	10.882	19.1328	35.3088	9.68717	1.27052	2.30126	5.77176	15.4608	28.9658	23.625	8.72061	22.4716
Phosphoglycerate kinase 2 s	84.7	1.59241e-12	s−1	84.7	84.7	84.7	84.7	84.7	84.7	84.7	84.7	84.7	84.7	84.7	84.7	84.7	84.7	84.7	84.7	84.7	84.7	84.7	84.7	84.7	84.7	84.7	84.7	84.7	84.7	84.7	84.7	84.7	84.7	84.7	84.7	84.7	84.7	84.7	84.7	84.7	84.7	84.7	84.7	84.7	84.7	84.7	84.7	84.7	84.7
Phosphoglycerate kinase 3 s	9990.38	163.591	L2·mol−2·s−1	10000	10000	10000	10000	10000	10000	10000	10000	10000	10000	10000	10000	10000	10000	10000	10000	10000	10000	10000	10000	10000	10000	10000	10000	10000	10000	10000	10000	10000	10000	6987.34	10000	10000	10000	10000	10000	10000	10000	10000	10000	10000	10000	10000	10000	10000	10000
Phosphoglycerate kinase 3 s_rev	7573.29	3265.47	s−1	2613.86	7695.65	9750.49	2001.17	9574.79	702.735	500.432	1341.23	9124.27	1299.16	4794.36	1100.94	8346.71	6563.99	10000	10000	10000	8550.92	5996.3	907.229	8085.53	4906.83	10000	6197.8	7000.64	1330.93	10000	10000	142.675	9362.35	238.559	749.886	7725.68	10000	10000	4870.22	10000	1205.1	6901.7	440.052	8213.01	10000	1572.42	4187.57	8896.67	960.782
Phosphoglycerate kinase 4 s	4848.03	3367.5	s−1	770.459	7862.72	2919.41	3470.18	1088.29	624.348	3864.97	4034.87	7858.27	4032.31	6102.35	505.709	5179.82	10000	3514.5	1415.85	880.308	9470.86	9591.52	1150.1	5807.03	976.281	9461.06	2509.07	123.264	10000	478.041	3499.91	1298.44	6892.93	521.914	572.229	6607.13	1570.19	3401.34	2402.32	6197.87	7380.23	1703.29	4787.31	2787.45	116.691	701.205	4676.48	10000	8424.77
Glyceraldehyde-3-phosphate dehydrogenase 1 s	10000	0	L2·mol−2·s−1	10000	10000	10000	10000	10000	10000	10000	10000	10000	10000	10000	10000	10000	10000	10000	10000	10000	10000	10000	10000	10000	10000	10000	10000	10000	10000	10000	10000	10000	10000	10000	10000	10000	10000	10000	10000	10000	10000	10000	10000	10000	10000	10000	10000	10000	10000
Glyceraldehyde-3-phosphate dehydrogenase 1 s_rev	900.215	604.42	s−1	1928.99	1341.03	789.895	2085.61	2339.54	1654.7	1724.99	354.173	2115.75	1941.28	1710.29	990.981	1232.18	151.889	1223.14	77.4316	1229.14	86.7242	1553.18	758.021	1530.22	768.222	751.734	2133.03	607.824	739.645	1341.94	717.485	228.126	1637.4	1408.03	1983.91	690.859	868.075	471.008	1153.59	452.194	1606.11	359.88	792.124	965.074	2269.81	1644.64	253.167	174.122	469.194
Glyceraldehyde-3-phosphate dehydrogenase 2 s	10000	0	s−1	10000	10000	10000	10000	10000	10000	10000	10000	10000	10000	10000	10000	10000	10000	10000	10000	10000	10000	10000	10000	10000	10000	10000	10000	10000	10000	10000	10000	10000	10000	10000	10000	10000	10000	10000	10000	10000	10000	10000	10000	10000	10000	10000	10000	10000	10000
Glyceraldehyde-3-phosphate dehydrogenase 3 s	9550.07	1479.42	L2·mol−2·s−1	7944.48	10000	10000	3208.68	10000	10000	10000	8448.3	10000	10000	10000	10000	5059.21	10000	10000	10000	10000	2511.5	10000	10000	812.104	3964.76	6278.79	10000	10000	10000	10000	10000	10000	10000	10000	10000	10000	10000	10000	10000	10000	10000	10000	10000	8477.21	10000	5311.25	10000	10000	10000
Glyceraldehyde-3-phosphate dehydrogenase 3 s_rev	9448.35	1829.08	s−1	10000	10000	10000	5347.56	10000	10000	10000	10000	10000	10000	10000	10000	6520.95	10000	10000	10000	10000	2204.04	10000	10000	109.864	5041.27	8148.81	10000	10000	10000	10000	10000	10000	10000	10000	10000	10000	10000	10000	10000	10000	10000	10000	10000	10000	10000	7982.49	10000	10000	10000
Glyceraldehyde-3-phosphate dehydrogenase 4 s	1745.93	2181.21	s−1	1147.31	569.454	227.212	200.077	251.436	39.0604	571.371	994.695	239.34	123.348	264.138	877.981	2226.16	93.8164	14.0268	110.955	97.9073	2138.21	158.911	69.279	1294.22	1813.59	2706.88	206.602	122.63	10.0785	90.5258	126.691	96.7839	1056.93	507.936	115.706	991.875	645.959	81.668	241.366	32.4012	25.549	68.6107	410.113	297.024	27.6912	1200.38	550.514	1503.43	646.538
Triosephosphate isomerase 1 s	3247.46	962.959	L·mol−1·s−1	3461.77	4598.21	3553.63	2322.69	4116.79	1143.2	3288.84	3071.97	3667.22	3235.57	4429.04	2696.6	956.094	1506.85	3816.19	3175.43	2613.27	4413.3	4166.51	4424.3	4315.12	2828.37	1631.6	3160.73	2181.57	2769.74	3865.99	2110.49	1404.04	1371.73	2251.35	4452.86	3656.58	2541.29	3142.66	2626.81	4019.63	4225.18	3260.89	4067.62	3904.15	1576.18	4295.48	4047.72	3274.32	2602.94
Triosephosphate isomerase 1 s_rev	2460.22	2194.37	s−1	7575.03	7880.71	7783.93	7439.26	7729.78	4531.91	8675.84	1814.05	6016.51	1069.13	3439.92	520.67	1265.31	6708.05	269.208	1028.83	713.759	3078.72	1537.18	828.36	1972.5	1974.95	112.738	1488.4	9343.1	3584.67	3010.88	797.809	4180.03	3071.44	4504.51	339.839	1397.55	2353.94	6493.58	277.631	1081.76	384.831	188.73	8448.41	1495.78	2700.82	4942.27	2309.72	6790.18	2758.22
Triosephosphate isomerase 2 s	3372	0	s−1	3372	3372	3372	3372	3372	3372	3372	3372	3372	3372	3372	3372	3372	3372	3372	3372	3372	3372	3372	3372	3372	3372	3372	3372	3372	3372	3372	3372	3372	3372	3372	3372	3372	3372	3372	3372	3372	3372	3372	3372	3372	3372	3372	3372	3372	3372
Triosephosphate isomerase 3 s	132.036	52.718	L·mol−1·s−1	76.486	149.558	180.274	189.314	37.6657	199.649	156.671	211.6	112.229	196.993	154.348	179.011	212.561	196.038	184.73	169.529	177.606	161.92	211.534	194.206	73.052	189.97	105.316	179.612	107.263	76.7599	103.25	153.283	151.51	169.764	167.66	195.617	183.798	39.4192	41.77	89.5463	210.326	195.592	184.447	18.8689	137.408	114.624	98.547	28.412	84.8946	31.3062
Triosephosphate isomerase 3 s_rev	7739.21	3275.56	s−1	10000	10000	10000	10000	9399.06	10000	10000	10000	10000	3198.8	10000	10000	10000	8492.96	5266.39	4139.05	10000	3948.21	10000	6539.38	10000	10000	1550.82	10000	10000	10000	5377.07	10000	10000	10000	10000	940.087	10000	4.10875	10000	10000	86.4481	1606.39	10000	5489.84	8971.17	10000	2890.38	4193.97	10000	10000
Triosephosphate isomerase 4 s	5971.63	3747.21	s−1	4675.96	6.46941	4458.88	4769.52	8260.68	1579.05	8320.47	6085.27	3541.68	10000	7677.92	1715.35	5179.27	10000	10000	10000	6639.55	10000	7019.31	10000	5057.95	3740.07	10000	949.769	5134.25	31.6458	10000	5766.59	8209.7	2857.44	1292.32	10000	471.545	10000	2525.6	342.255	10000	10000	4084.35	3356.93	10000	9080.18	10000	9127.15	6995.32	1333.29
Aldolase 1a s	6.84362	1.96366	L2·mol−2·s−1	8.39116	9.7711	7.22236	2.97175	8.27755	6.88744	4.83436	6.27015	6.64553	6.87396	3.40395	9.62302	6.14317	4.70017	7.00329	9.19982	6.58094	9.00385	4.84199	8.77734	6.69469	7.94628	5.81745	8.05919	4.92592	4.90642	4.48645	8.9651	4.86548	8.34833	7.76714	8.77953	8.86875	9.16837	2.92132	6.08974	8.56693	5.67604	8.43048	7.43509	9.11421	5.22107	4.29823	7.84795	8.89695	8.39915
Aldolase 1a s_rev	6155.39	3629.43	s−1	1399.34	10000	67.545	9092.11	7436.1	1343.85	5229.28	10000	4094.7	10000	5578.11	630.323	872.62	2266.72	4950.5	1690.77	3854.24	8110.84	2793.83	10000	2970.94	10000	5465.79	67.7499	1811.81	2508.37	195.419	5362.09	3678.92	521.181	10000	6725.64	10000	279.08	373.811	10000	7455.04	1349.46	4366.81	10000	468.071	10000	7486.15	2510.83	6538.39	519.62
Aldolase 2a s	8482.66	2471.05	s−1	10000	9959.78	10000	10000	10000	10000	10000	6710.27	10000	3751.78	10000	10000	10000	10000	10000	10000	10000	10000	10000	7466.86	10000	2089.7	10000	10000	10000	10000	10000	10000	10000	10000	6302	10000	6548.82	10000	10000	9723.96	10000	10000	10000	1329.27	10000	9312.17	10000	10000	10000	10000
Aldolase 3a s	336.68	132.105	L·mol−1·s−1	442.03	542.897	555.043	82.9951	383.859	450.129	269.93	399.831	271.529	506.317	229.55	471.052	493.772	264.641	85.4632	549.361	217.44	295.544	201.193	538.978	252.924	56.0512	485.259	534.874	516.735	366.134	177.57	322.429	214.581	361.116	450.729	444.782	387.151	479.703	117.343	369.782	324.52	271.709	378.783	64.2468	495.349	406.755	35.0727	337.583	464.564	455.367
Aldolase 3a s_rev	413.417	992.026	s−1	24.2254	103.391	25.5142	191.92	50.1166	34.9159	134.199	501.106	21.1469	304.677	163.87	12.9333	72.8583	127.928	11.4174	45.4391	14.8738	20.8921	86.835	1626.15	1.12701	60.0309	112.992	21.2063	160.99	92.9833	3.2692	26.0024	74.8169	8.43294	234.084	70.3364	340.039	15.5697	13.1258	327.479	178.627	20.9309	113.538	23.6565	3.42811	236.127	29.1802	38.0007	88.9395	49.2571
Aldolase 4a s	64.5	0	s−1	64.5	64.5	64.5	64.5	64.5	64.5	64.5	64.5	64.5	64.5	64.5	64.5	64.5	64.5	64.5	64.5	64.5	64.5	64.5	64.5	64.5	64.5	64.5	64.5	64.5	64.5	64.5	64.5	64.5	64.5	64.5	64.5	64.5	64.5	64.5	64.5	64.5	64.5	64.5	64.5	64.5	64.5	64.5	64.5	64.5	64.5
Fructose-1,6-bisphosphatase 1 s	328.142	134.267	L·mol−1·s−1	514.589	393.122	179.419	456.496	70.6598	548.91	391.63	488.934	418.797	91.554	271.539	419.009	347.196	473.264	543.876	126.415	309.095	500.095	236.726	257.709	348.779	413.161	139.883	362.681	531.893	113.504	340.392	178.073	375.34	443.054	222.025	543.387	556.454	362.973	79.854	411.944	441.97	325.778	350.155	101.181	156.348	133.953	283.541	268.651	531.717	522.798
Fructose-1,6-bisphosphatase 1 s_rev	8814.85	2563.01	s−1	10000	10000	10000	10000	3168.33	10000	10000	10000	10000	10000	10000	10000	10000	10000	10000	222.301	10000	10000	8388.94	3416.58	10000	10000	10000	10000	10000	5690.29	10000	7641.61	10000	10000	10000	10000	10000	10000	2861.01	10000	10000	10000	7926.64	17.0513	10000	10000	10000	8777.52	10000	10000
Fructose-1,6-bisphosphatase 2 s	5324.31	3235.4	s−1	2288.41	2082.14	518.326	1730.27	9528.95	1047.49	3082.53	2478.02	1761.34	2416.9	2775.95	4043.57	3412.77	3724.88	5494.32	10000	4270.97	1325.01	10000	10000	1440.72	1339.59	3573.96	1641.03	1996.85	10000	3091.32	10000	3743.29	4167.05	4878.3	1846.96	3271.49	4881.24	10000	3611.34	7684.69	3163.18	10000	0.42	1731.4	7053.72	6838.85	10000	2596.04	5914.45
Transketolase 1a s	7.76468	2.47696	L2·mol−2·s−1	2.47741	3.67984	6.57127	10.4948	2.28979	3.21319	8.30264	10.5456	10.495	6.5159	10.2681	5.37317	3.18593	7.49629	5.11122	10.0081	6.5394	8.31859	4.63107	4.41903	8.76066	8.55022	7.1884	8.58028	5.10437	4.17832	7.06361	4.69861	9.17344	9.72264	10.3401	5.95419	8.18384	9.74262	10.4365	7.91989	5.87317	2.45617	10.9141	10.107	8.43512	3.53384	5.28737	11.0905	10.4838	11.1722
Transketolase 1a s_rev	6809.01	3567.37	s−1	1147.84	9399.54	10000	2066.51	1389.24	4457.67	5576.71	10000	3116.69	10000	10000	10000	6598.57	10000	3592.21	3212.09	655.551	10000	10000	7736.23	10000	5105.37	3047.28	802.383	452.038	3847.55	2324.44	10000	10000	7644.93	10000	6935.1	10000	9854.5	3524.33	6250.69	10000	263.6	2437.85	7273.71	10000	5541.29	734.41	4580.04	10000	10000
Transketolase 2a s	7995.52	2697.03	s−1	10000	10000	9000.19	10000	10000	10000	10000	4325.67	10000	3233.36	2349.42	8102.44	10000	4391.54	10000	10000	10000	8794.68	8225.04	10000	8821.55	10000	10000	10000	10000	10000	10000	9712.98	8283.87	10000	7298.52	10000	6968.67	10000	10000	10000	7461.93	10000	10000	10000	4384.26	10000	10000	10000	1872.38	2937.08
Transketolase 3a s	9736.23	1316.7	L2·mol−2·s−1	10000	10000	10000	10000	10000	10000	10000	10000	10000	10000	10000	10000	10000	10000	10000	10000	10000	10000	10000	10000	10000	10000	10000	10000	10000	10000	10000	10000	10000	10000	10000	10000	10000	10000	10000	10000	10000	10000	10000	10000	10000	10000	10000	10000	10000	10000
Transketolase 3a s_rev	8227.46	2978.83	s−1	10000	10000	10000	2804.67	10000	10000	10000	10000	501.454	10000	10000	10000	10000	10000	10000	8301.53	1368.86	10000	10000	10000	10000	1415.81	10000	149.369	10000	9944.03	10000	10000	3467.77	4969.98	10000	10000	5720.4	10000	6050.29	10000	10000	10000	1028.67	10000	10000	10000	10000	2761.15	10000	10000
Transketolase 4a s	5388.26	3824.23	s−1	1210.16	1496.77	1746.89	10000	967.873	1082.21	7925.73	1681.1	10000	36.3341	363.023	2744.3	373.592	733.649	9667.17	10000	10000	3200.2	559.748	5379.34	3161.35	10000	7952.79	10000	5700.83	10000	6446.26	754.213	10000	10000	8798.65	2130.81	10000	4343.58	10000	4112.18	6260.45	953.338	10000	7449.62	3895.24	1783.5	8646.97	10000	251.822	1038.59
Aldolase 1b s	7.12927	2.20057	L2·mol−2·s−1	10.068	9.57595	7.73229	9.95747	5.07103	4.45236	8.08228	8.91737	9.11408	7.66743	6.57066	7.83042	5.72852	8.90377	10.3757	8.97072	8.9692	5.69397	6.72976	8.40602	3.92925	8.85955	6.07916	9.04159	5.79387	7.50314	8.19944	9.46424	9.85182	4.98051	8.00587	10.1043	10.0495	8.6386	10.4029	6.75447	5.48661	9.54264	9.50708	9.11197	4.23339	3.56408	5.78982	8.42622	7.68545	5.1982
Aldolase 1b s_rev	6598.57	3579.55	s−1	3924.6	2535.99	1493.7	5793.44	1771.24	2793.74	62.0447	3182.85	5339.4	1699.17	766.825	3511.15	3594.99	7920.89	2925.9	6912.26	408.208	2521.13	620.362	650.442	269.216	4688.46	33.8253	1916.49	4787.22	2356.15	4132.82	10000	10000	1011.71	1278.59	10000	6707.61	6473.88	8766.24	1345.31	1042.33	10000	10000	10000	4578.77	1312.89	6379.69	1766.22	9757	6880.42
Aldolase 2b s	8151.23	2609.76	s−1	10000	10000	10000	10000	10000	10000	10000	10000	10000	10000	10000	10000	10000	10000	10000	10000	10000	10000	10000	10000	10000	10000	10000	10000	10000	10000	10000	8352.52	5306.01	10000	10000	5253.12	10000	10000	10000	10000	10000	6463.51	6096.3	6922.89	10000	10000	10000	10000	10000	10000
Aldolase 3b s	288.018	114.404	L·mol−1·s−1	431.897	362.04	315.722	313.892	403.436	200.689	343.262	411.42	244.796	406.196	348.983	237.336	261.953	279.99	421.288	268.031	347.026	375.814	431.048	391.314	334.197	365.666	264.523	389.888	284.682	290.447	313.31	242.541	299.634	243.19	318.167	436.106	319.164	269.869	329.145	336.517	341.693	307.617	179.994	231.486	104.127	344.452	354.912	454.54	225.198	249.941
Aldolase 3b s_rev	163.275	536.987	s−1	16.0359	7.11071	7.77928	10.4018	51.7654	28.1801	3.62194	17.4806	4.77562	18.6536	16.0758	4.82362	26.4369	18.3844	10.2021	12.9514	1.58273	41.0744	23.3755	8.3618	51.1128	18.7097	6.38089	9.88367	37.4519	9.37444	14.3793	21.0812	57.0382	18.0216	5.87907	90.81	13.264	13.8141	18.959	15.8995	27.9845	47.4133	20.0755	29.881	12.9719	83.4796	66.8069	18.7158	24.917	56.9566
Aldolase 4b s	25.2	4.47866e-13	s−1	25.2	25.2	25.2	25.2	25.2	25.2	25.2	25.2	25.2	25.2	25.2	25.2	25.2	25.2	25.2	25.2	25.2	25.2	25.2	25.2	25.2	25.2	25.2	25.2	25.2	25.2	25.2	25.2	25.2	25.2	25.2	25.2	25.2	25.2	25.2	25.2	25.2	25.2	25.2	25.2	25.2	25.2	25.2	25.2	25.2	25.2
Sedoheptulose-1,7-phosphatase 1 s	263.394	116.688	L·mol−1·s−1	191.941	437.353	406.587	62.4688	419.729	200.893	109.422	134.944	288.012	64.5406	399.843	142.008	137.022	312.98	203.83	162.428	95.5263	239.632	352.267	234.491	393.018	250.644	144.921	107.255	306.642	404.754	65.9184	71.2646	263.056	401.967	226.062	345.876	262.828	98.7438	258.431	310.429	207.628	142.012	72.8255	154.685	172.212	271.164	455.64	427.727	464.204	304.716
Sedoheptulose-1,7-phosphatase 1 s_rev	261.636	151.793	s−1	168.687	487.931	447.91	0.262541	465.005	180.332	61.3421	94.5417	293.661	2.95777	439.136	103.731	97.2449	326.14	184.152	130.295	43.2655	230.726	377.247	224.038	430.258	245.051	107.521	58.5229	317.896	445.525	4.75001	11.7046	261.197	441.9	213.073	368.933	260.899	47.451	255.181	322.821	189.093	103.736	13.7351	120.222	143.023	271.744	511.72	475.409	522.861	315.39
Sedoheptulose-1,7-phosphatase 2 s	81	0	s−1	81	81	81	81	81	81	81	81	81	81	81	81	81	81	81	81	81	81	81	81	81	81	81	81	81	81	81	81	81	81	81	81	81	81	81	81	81	81	81	81	81	81	81	81	81	81
Transketolase 1b s	2.65574	0.824626	L2·mol−2·s−1	1.56832	3.87674	1.54257	0.862036	3.54651	1.82433	2.96193	0.993797	1.6883	3.43606	1.5421	1.60257	1.87878	1.52841	2.54544	2.64849	3.43851	3.01419	1.85507	2.01344	2.11509	2.66385	1.87045	3.77403	3.64387	1.57379	1.61438	2.67633	1.92865	2.7747	3.88423	3.07904	3.88164	1.50291	0.848659	3.20945	2.87327	2.59183	3.73578	3.47598	2.28599	3.0151	2.20644	1.58879	1.25823	2.71868
Transketolase 1b s_rev	6957.88	3512.1	s−1	284.907	10000	605.473	790.211	4938.13	4934.18	10000	1531.35	10000	10000	1144.14	8187.48	104.725	8481.79	3570.18	6498.54	988.04	4728.84	10000	8714.86	10000	10000	1214.13	4802.54	10000	10000	2581.7	10000	6109.41	10000	10000	10000	10000	3202.17	1414.68	834.063	10000	1115.79	8831.25	1519.32	10000	9324.28	10000	6250.48	4468.95	10000
Transketolase 2b s	7861.74	2805.02	s−1	10000	3597.95	10000	10000	10000	10000	3553.26	10000	7759.98	6029.99	10000	10000	10000	10000	10000	10000	10000	10000	9050.14	10000	5085.47	6628.84	10000	10000	2064.62	7910.75	10000	9102.76	10000	5839.92	3388.42	5237.99	1836	10000	10000	10000	8597.58	10000	10000	10000	3099.64	10000	7047.59	10000	10000	4800.49
Transketolase 3b s	3451.87	2350.6	L2·mol−2·s−1	2306.46	7184.04	2028.21	3103.06	3500.62	3409.81	621.36	697.046	3235.97	1772.11	2490.89	2994.51	3085.61	2273.99	4914.38	870.354	5928.13	2040.48	3001.71	5078.74	728.305	5833.61	3616.61	4443.68	1860.18	9766.36	1623.55	765.03	7641.75	1410.44	1717.91	862.28	3488.95	2501.55	345.931	2700.35	2914.18	2547.92	3261.59	2850.31	5063.12	6991.02	2388.07	1777.67	4437.9	1492.97
Transketolase 3b s_rev	8234.83	3026.22	s−1	6615.15	10000	10000	10000	1439.15	10000	9233.44	10000	10000	10000	10000	10000	10000	10000	8972.32	296.753	3793.36	5033.87	10000	10000	10000	10000	10000	6540.57	10000	10000	10000	2847.57	10000	9359.71	10000	10000	10000	10000	4472.1	4679.58	453.18	5839.6	10000	3385.41	10000	10000	10000	10000	10000	10000
Transketolase 4b s	5420.43	3795.38	s−1	10000	2948.75	6045.59	920.441	10000	3459.47	6536.08	5896.19	931.353	4994.32	3502.34	3533.75	5740.7	1205.36	10000	10000	10000	10000	1131.57	5373.81	2718.44	2048.15	4388.65	10000	548.388	555.144	6087.33	10000	2769.24	10000	6265.22	9202.93	762.621	2368.68	5693.28	10000	10000	10000	9369.43	10000	97.3909	3654.76	2402.26	4005.5	1944.64	2479.07
Ribulose-5-phosphate epimerase 1 s	10000	0	L·mol−1·s−1	10000	10000	10000	10000	10000	10000	10000	10000	10000	10000	10000	10000	10000	10000	10000	10000	10000	10000	10000	10000	10000	10000	10000	10000	10000	10000	10000	10000	10000	10000	10000	10000	10000	10000	10000	10000	10000	10000	10000	10000	10000	10000	10000	10000	10000	10000
Ribulose-5-phosphate epimerase 1 s_rev	5590.66	3519.67	s−1	2234.99	8463.16	525.284	1152.14	893.392	1129.31	1883.38	892.202	4623.04	1037.87	6801.75	1730.25	6719.44	6551.16	2930.93	10000	685.117	4876.64	8493.65	10000	8670.21	2418.36	5545.69	7593.73	2640	5304.72	10000	10000	10000	10000	6407.92	4058.07	9160.86	7906.01	1043.56	5833.3	4156.42	1280.99	849.205	2965.32	1377.31	2712.71	517.985	1241.03	1456.64	4377.93
Ribulose-5-phosphate epimerase 2 s	9274.45	1520.25	s−1	10000	10000	10000	10000	10000	10000	10000	10000	10000	10000	10000	10000	10000	10000	10000	4892.17	10000	10000	10000	4370.02	10000	10000	10000	10000	10000	10000	7234.64	9231.37	5832.03	5491.06	10000	10000	10000	10000	10000	10000	10000	10000	10000	10000	10000	10000	10000	10000	10000	10000
Ribulose-5-phosphate epimerase 3 s	56.8374	108.619	L·mol−1·s−1	37.0585	13.3639	97.3524	50.7236	39.4113	81.6315	50.5993	173.519	28.5831	114.986	65.031	20.7451	72.5449	118.28	41.1375	18.9303	60.8075	28.4828	87.0521	19.515	48.9702	45.3057	37.6111	31.6584	67.8026	1.61412	36.9889	18.4523	5.54773	37.9993	67.0138	57.4497	17.3957	62.6004	102.771	103.748	7.9023	35.4711	41.356	24.3101	17.6825	32.0451	38.5709	67.8959	32.3519	42.8294
Ribulose-5-phosphate epimerase 3 s_rev	8511.47	2758.01	s−1	7488.75	10000	10000	2819.6	9750.56	10000	6646.21	10000	5286.04	10000	10000	10000	10000	10000	10000	10000	10000	582.914	10000	10000	10000	10000	10000	10000	10000	1425.42	10000	3848.42	10000	10000	10000	9881.69	10000	10000	10000	10000	1064.07	2144.49	10000	175.197	2771.95	9574.93	2746.43	10000	10000	4371.93
Ribulose-5-phosphate epimerase 4 s	5039.74	3747.51	s−1	10000	4676.38	7471.53	10000	10000	2435.52	10000	841.958	10000	5350.42	4984.91	4643.99	3027.79	185.886	1005.54	1935.18	2555.5	10000	1524.61	76.3958	6422.65	3090.63	8928.36	6294.79	6153.71	2040.8	1245.61	10000	5023.03	823.02	324.446	10000	3645.38	5453	5137.84	1980.51	10000	10000	8435.97	10000	10000	10000	10000	6163.53	6523.64	10000
Ribose-5-phosphate isomerase 1 s	931.152	298.101	L·mol−1·s−1	981.422	805.792	772.201	467.365	1038.14	1225.94	886.727	668.589	1089.63	445.778	1267.21	1317.12	1323.01	1048.6	947.742	960.366	584.956	1235.03	825.411	1048.6	1350.33	882.042	1220.02	980.435	834.881	1256.06	1398.13	1166.43	392.128	963.53	1171.56	1347.29	1210.34	1397.41	1221.53	757.001	941.39	971.341	1305.68	1216.48	992.933	1057.94	624.626	703.922	461.55	680.734
Ribose-5-phosphate isomerase 1 s_rev	3215.19	2688.79	s−1	607.647	2284.78	3408.72	4766.6	3575.13	165.441	4717.96	485.105	2102.18	3270.07	995.168	3001.37	1842.23	7497.15	2709.93	1691.66	775.944	1605.61	822.966	2673.1	2867.53	8296.34	7507.01	3056.47	173.706	620.778	783.423	1652.14	1368.25	1466.17	2926.06	848.398	4113.36	9056.62	3687.59	3133.62	2717.12	186.335	8975.97	5711.35	701.159	175.072	1408.82	224.905	5008.93	4973.12
Ribose-5-phosphate isomerase 2 s	3440	0	s−1	3440	3440	3440	3440	3440	3440	3440	3440	3440	3440	3440	3440	3440	3440	3440	3440	3440	3440	3440	3440	3440	3440	3440	3440	3440	3440	3440	3440	3440	3440	3440	3440	3440	3440	3440	3440	3440	3440	3440	3440	3440	3440	3440	3440	3440	3440
Ribose-5-phosphate isomerase 3 s	1057.33	427.356	L·mol−1·s−1	932.845	1015.45	529.107	580.546	471.344	1640	1534.63	497.639	1135.69	199.488	1588.44	1429.54	1114.14	545.228	501.201	1043.7	1602.98	1455.15	1383.7	1276.29	741.063	801.106	768.222	609.088	1103.93	1377.52	1575.75	1479.85	665.625	983.878	1084.41	1167.81	1115.85	587.568	1339.99	938.739	537.414	1352.75	1066.97	1752.29	1286.79	1630.54	616.879	1105	881.096	376.468
Ribose-5-phosphate isomerase 3 s_rev	7833.98	3122.17	s−1	2113.8	10000	10000	10000	2285.01	4028.53	10000	474.868	9496.33	8942.75	6225.21	10000	3878.71	10000	2263.26	9192.01	10000	8667.79	10000	10000	1331.56	10000	10000	5394.04	5262.31	3201.48	3916.3	10000	10000	6915.74	10000	982.807	10000	10000	10000	10000	2899.24	5479.41	10000	10000	6952.74	6718.64	10000	9593.31	10000	10000
Ribose-5-phosphate isomerase 4 s	6241.42	3674.04	s−1	10000	5354.18	8274.51	199.704	10000	10000	1700.04	10000	10000	3003.43	10000	7543.97	10000	4552.23	10000	10000	2751.57	10000	7011.62	6027.42	10000	1199.77	4386.8	10000	10000	10000	10000	9354.78	2022.72	10000	9598.24	10000	6359.76	6702.22	5569.73	3618.26	10000	10000	2429.26	2407.15	10000	10000	9797.95	10000	21.2903	4094.68
Phosphoribulokinase 1 s	10000	0	L2·mol−2·s−1	10000	10000	10000	10000	10000	10000	10000	10000	10000	10000	10000	10000	10000	10000	10000	10000	10000	10000	10000	10000	10000	10000	10000	10000	10000	10000	10000	10000	10000	10000	10000	10000	10000	10000	10000	10000	10000	10000	10000	10000	10000	10000	10000	10000	10000	10000
Phosphoribulokinase 1 s_rev	8198.95	2736.39	s−1	10000	2709.55	5738.3	6063.73	10000	10000	10000	10000	10000	6181.16	4162.9	6130.59	10000	5490.77	3839.76	8460.75	3216.52	10000	10000	10000	903.995	10000	1255.91	10000	10000	7326.5	8511.74	10000	6840.28	10000	10000	9447.44	10000	10000	10000	10000	10000	10000	10000	3333.71	7400.01	10000	6126.67	10000	10000	9362.93
Phosphoribulokinase 2 s	8862.28	1244.27	s−1	7381.08	10000	10000	10000	8530.98	8311.81	9176.14	7266.84	8077.94	10000	10000	10000	8680.84	10000	10000	10000	10000	8433.34	9420.61	9150.51	10000	6704.85	10000	7141.34	9414.11	10000	10000	6681.63	10000	7169.49	7570.19	10000	8780.54	6883.39	8300.99	7604.68	7906.3	7631.82	7206.58	10000	10000	9964.06	10000	9922.67	6773.11	10000
Phosphoglucoisomerase 1 s	167.626	58.858	L·mol−1·s−1	119.08	85.0529	70.8395	130.762	144.931	170.414	235.247	29.3991	118.395	152.66	53.3361	215.019	215.34	234.46	95.3054	196.034	212.567	69.0049	165.694	138.363	184.429	174.456	231.852	164.109	249.241	243.278	240.02	29.3407	194.903	180.545	148.234	201.311	168.834	146.756	171.701	165.335	181.739	64.8094	203.864	65.1479	210.247	238.438	107.132	101.191	184.713	209.721
Phosphoglucoisomerase 1 s_rev	7357.54	3407.57	s−1	4059.19	10000	10000	1822.5	10000	4970.13	10000	3008.54	40.7007	2702.51	10000	10000	10000	10000	610.116	10000	10000	10000	9322.24	5860.19	10000	8917.59	10000	10000	10000	10000	10000	6488.54	6313	3181.45	10000	1514.4	3047.97	6404.24	10000	10000	10000	1609.53	10000	10000	10000	10000	10000	7313.87	10000	3040.48
Phosphoglucoisomerase 2 s	6877.28	3469.76	s−1	10000	2190.22	8579.45	10000	5431.86	10000	8400.89	8566.15	10000	10000	5604.85	3707.07	6244.89	3068.56	10000	2988.61	4005.98	3773.56	10000	10000	8463.52	10000	8653.41	9753.3	6342.7	7795.93	1926.51	5063.15	10000	10000	5832.07	10000	10000	10000	1062.6	7398.02	8793.46	10000	6581.68	1536.96	451.133	520.69	9500.23	10000	9288.45	10000
Phosphoglucoisomerase 3 s	90.4911	35.0212	L·mol−1·s−1	45.6734	39.2141	83.0211	66.2084	56.5994	133.532	70.2666	105.425	94.3951	125.458	144.345	95.7587	125.261	111.126	43.491	35.4123	51.727	110.633	73.2007	20.5341	131.818	87.4987	79.31	85.9515	127.74	104.087	75.6344	20.4839	109.43	127.227	97.2427	101.064	77.4899	55.9732	70.6378	82.9489	20.3336	136.17	131.894	91.1501	133.166	106.2	142.729	47.0718	48.0346	83.8497
Phosphoglucoisomerase 3 s_rev	7821.05	3227.89	s−1	714.381	10000	10000	210.18	6382.36	8893.87	2432.9	10000	3442.18	5075.99	10000	10000	10000	10000	10000	10000	7330.44	10000	10000	810.653	10000	4786.2	1161.73	6471.26	10000	6996.7	10000	10000	7993.34	10000	10000	420.045	3505.86	4244.85	10000	10000	1459.63	10000	10000	10000	10000	10000	10000	10000	1583.09	3874.71
Phosphoglucoisomerase 4 s	6167.02	3673.54	s−1	10000	3567.06	7512.31	10000	10000	10000	10000	641.902	10000	10000	1142.69	2809.53	5317.53	1831.38	8727.7	5637.89	10000	1542.74	8990.68	10000	7401.04	10000	10000	10000	6733.14	10000	3700.9	137.422	10000	9959.68	4779.56	10000	10000	10000	2145.06	5936.47	10000	2912.37	1238.98	3486.09	1604.14	1219.01	1538.51	4827.79	10000	10000
Phosphoglucomutase 1 s	95.3378	33.151	L·mol−1·s−1	138.715	79.8834	85.363	64.3375	47.9388	23.1774	86.887	53.6952	88.9516	126.009	123.954	144.027	14.769	112.293	114.503	71.3967	132.2	135.271	89.5794	114.073	38.0267	140.349	144.585	98.992	121.834	88.514	102.124	115.819	131.825	86.2975	70.6681	137.961	132.836	131.156	103.464	143.664	122.813	100.831	118.047	53.5855	136.382	119.974	121.8	101.135	132.662	41.6669
Phosphoglucomutase 1 s_rev	7467.4	3378.29	s−1	10000	10000	10000	4204.39	10000	10000	9917.37	4453.35	3265	846.999	9472.69	10000	5682.61	10000	10000	10000	10000	10000	10000	1817.56	1679.63	6149.11	10000	10000	3500.46	10000	1696.77	10000	2609.8	6606.14	10000	10000	10000	10000	10000	10000	508.097	4129.24	1673.03	4085.26	4474.15	10000	1539.8	2446.45	10000	1523.19
Phosphoglucomutase 2 s	6647.03	3578.49	s−1	5106.61	417.191	2597.36	10000	946.161	846.759	10000	10000	10000	10000	10000	8923.48	4501.05	9348.34	9919.07	7612.49	6907.68	539.962	2877.41	10000	10000	10000	338.615	584.657	10000	1466.85	10000	3584.37	10000	10000	2730.37	1069.78	7161.56	8273.81	3442.96	3464.55	10000	10000	10000	10000	10000	4439.73	10000	10000	4921.74	10000
Phosphoglucomutase 3 s	1286.61	499.418	L·mol−1·s−1	1402.18	1244.87	694.059	775.686	1253.36	1964.52	848.543	547.175	1237.25	2053.88	1110.19	1677.74	1688.3	1481.79	1100.79	738.895	1940.43	378.224	322.479	2023.53	1564.38	1844.62	325.874	772.087	1771.13	299.034	1488.8	961.907	1706.23	1473.16	1479.97	668.399	1904.49	1846.8	1114.97	1551.57	1962.5	1066.94	1139.18	1965.54	2018.92	1719.92	1803.37	1313.6	679.552	704.11
Phosphoglucomutase 3 s_rev	7989.29	3053.93	s−1	10000	10000	4174.85	1644.34	10000	10000	5419.22	2415.18	2475.33	1078.49	1597.55	10000	10000	10000	10000	10000	10000	10000	10000	10000	10000	3926.01	5935.36	10000	4456.92	6468.77	2267.32	10000	2389.07	10000	10000	10000	10000	10000	10000	10000	6083.62	719.854	1567.2	10000	3252.82	10000	3420.81	4657.8	3918.24	10000
Phosphoglucomutase 4 s	5938.4	3741.67	s−1	7127.54	576.226	10000	10000	1213.13	571.098	10000	10000	10000	10000	10000	8897.1	236.006	6205.68	5034.04	5218.49	5602.1	6931.95	3349.95	8531.91	5765.42	10000	9913.65	2642.89	10000	8074.85	10000	5297.27	10000	5587.16	1733.91	2863.74	4080	5757.54	6021.69	3392.6	10000	10000	10000	6909.56	10000	5235.72	10000	10000	10000	1061.36
Glucose-1-phosphate adenylyltransferase 1 s	9990.71	254.481	L2·mol−2·s−1	10000	10000	10000	10000	10000	9184.63	10000	10000	10000	10000	10000	10000	10000	10000	10000	10000	10000	10000	10000	10000	10000	10000	10000	10000	10000	10000	10000	10000	10000	10000	10000	10000	10000	10000	10000	10000	10000	10000	10000	10000	10000	10000	10000	10000	10000	10000
Glucose-1-phosphate adenylyltransferase 1 s_rev	6709.99	3567.3	s−1	6945.08	3828.69	10000	7379.85	10000	2801.23	9480.66	4987.29	10000	10000	4042.63	10000	232.428	10000	1050.12	21.558	8081.34	10000	3659.94	8392.04	613.74	9840.81	10000	10000	10000	6296.61	4643.54	3190.45	2825.9	1132.33	10000	10000	6401.63	10000	10000	9279.13	2251.5	3739.85	6714.81	10000	4957.93	8725.93	10000	787.111	10000	1779.29
Glucose-1-phosphate adenylyltransferase 2 s	7417.43	3374.13	s−1	10000	10000	1338.48	10000	1526.95	10000	10000	10000	707.121	6609.74	10000	6224.08	10000	3107.04	10000	10000	10000	1065.34	10000	10000	10000	10000	9151.87	7584.48	2023.99	10000	10000	10000	10000	10000	1412.23	860.176	10000	3553.7	2673.17	10000	10000	10000	10000	488.188	10000	10000	9138.48	10000	3644.87	10000
Glucose-1-phosphate adenylyltransferase 3 s	3916.59	3449.08	L2·mol−2·s−1	6513.95	3517.64	2977.67	3831.69	1302.26	10000	10000	2976.08	1602.27	5097.21	5097.78	10000	10000	1441.09	10000	10000	10000	3112.72	2428.95	10000	1640.75	4174.33	3042.3	1876.65	10000	2188.58	4359.84	10000	10000	3979.88	10000	10000	10000	10000	3293.55	5083.07	2340.28	5545.05	10000	10000	3462.69	5556.91	10000	6598.63	2449.23	10000
Glucose-1-phosphate adenylyltransferase 3 s_rev	8156.37	3074.54	s−1	2117.51	10000	10000	5883.52	9413.67	10000	10000	10000	10000	4835.2	10000	10000	10000	10000	10000	10000	10000	10000	9520.38	10000	7474.31	1425.84	10000	994.512	10000	7927.72	10000	6085.86	3341.59	7265.48	10000	10000	10000	10000	10000	10000	5888.7	10000	10000	10000	10000	10000	10000	10000	10000	8306.95
Glucose-1-phosphate adenylyltransferase 4 s	5396.12	3709.61	s−1	10000	2059.73	4466	10000	10000	3248.73	3993.62	3584.62	1699.28	10000	7830.91	1181.41	3994.73	260.981	4344.44	1186.72	2132.61	1136.02	10000	3672.7	10000	10000	2599.78	10000	167.401	10000	7910	10000	10000	10000	1481.04	488.164	1917.65	3477.2	2211.62	8275.73	10000	8730.65	3437.49	1903.92	6589.53	6268.52	4213.68	5642.5	817.34	10000
ADPGstore s	38.8798	19.6656	s−1	17.1726	54.2027	57.6854	69.5656	9.29751	16.861	23.8277	64.5634	63.8863	22.2927	42.6793	14.0293	18.8846	46.1882	37.8828	20.3592	27.8465	20.0332	59.9675	50.7416	14.0482	62.5945	60.2839	62.5385	27.6065	45.9069	19.9001	34.4153	66.2358	54.4687	22.3708	29.2069	13.4198	23.037	53.3428	30.1472	36.651	58.4944	23.2276	3.7218	58.0965	1.73491	41.476	30.7392	30.793	18.2163
ADPGstore s_rev	479.783	267.713	µmol·L−1·s−1	193.818	747.47	900.646	956.971	163.718	270.574	290.635	835.516	888.094	403.571	606.602	106.511	230.538	529.498	300.882	187.1	344.836	299.75	716.218	477.013	244.637	895.536	885.662	890.608	348.712	626.487	258.645	418.941	849.015	638.647	305.842	377.32	68.5363	231.763	745.951	345.926	285.593	786.85	97.3054	178.87	880.656	56.6808	489.339	293.279	354.179	31.0661
Rubisco carboxylase 1 y	10000	0	L2·mol−2·s−1	10000	10000	10000	10000	10000	10000	10000	10000	10000	10000	10000	10000	10000	10000	10000	10000	10000	10000	10000	10000	10000	10000	10000	10000	10000	10000	10000	10000	10000	10000	10000	10000	10000	10000	10000	10000	10000	10000	10000	10000	10000	10000	10000	10000	10000	10000
Rubisco carboxylase 1 y_rev	0.080231	0.0452845	s−1	0.0899282	0.0822852	0.0869605	0.124224	0.0438848	0.133824	0.123908	0.118164	0.0570609	0.116319	0.0739636	0.155162	0.125127	0.0392306	0.118335	0.105322	0.0294256	0.00729975	0.0190241	0.0714063	0.0702183	0.155527	0.0979843	0.0572575	0.0719442	0.00404967	0.124139	0.115858	0.137219	0.140186	0.0693557	0.0638944	0.024659	0.00173549	0.0623424	0.0970196	0.115504	0.147721	0.00596286	0.04268	0.155296	0.103473	0.0650534	0.13808	0.0313769	0.148647
Rubisco carboxylase 2 y	0.0712086	1.88703e-15	s−1	0.0712086	0.0712086	0.0712086	0.0712086	0.0712086	0.0712086	0.0712086	0.0712086	0.0712086	0.0712086	0.0712086	0.0712086	0.0712086	0.0712086	0.0712086	0.0712086	0.0712086	0.0712086	0.0712086	0.0712086	0.0712086	0.0712086	0.0712086	0.0712086	0.0712086	0.0712086	0.0712086	0.0712086	0.0712086	0.0712086	0.0712086	0.0712086	0.0712086	0.0712086	0.0712086	0.0712086	0.0712086	0.0712086	0.0712086	0.0712086	0.0712086	0.0712086	0.0712086	0.0712086	0.0712086	0.0712086
Phosphoglycerate kinase 1 y	0	0	L2·mol−2·s−1	0	0	0	0	0	0	0	0	0	0	0	0	0	0	0	0	0	0	0	0	0	0	0	0	0	0	0	0	0	0	0	0	0	0	0	0	0	0	0	0	0	0	0	0	0	0
Phosphoglycerate kinase 1 y_rev	0	0	s−1	0	0	0	0	0	0	0	0	0	0	0	0	0	0	0	0	0	0	0	0	0	0	0	0	0	0	0	0	0	0	0	0	0	0	0	0	0	0	0	0	0	0	0	0	0	0
Phosphoglycerate kinase 2 y	0	0	s−1	0	0	0	0	0	0	0	0	0	0	0	0	0	0	0	0	0	0	0	0	0	0	0	0	0	0	0	0	0	0	0	0	0	0	0	0	0	0	0	0	0	0	0	0	0	0
Phosphoglycerate kinase 3 y	0	0	L2·mol−2·s−1	0	0	0	0	0	0	0	0	0	0	0	0	0	0	0	0	0	0	0	0	0	0	0	0	0	0	0	0	0	0	0	0	0	0	0	0	0	0	0	0	0	0	0	0	0	0
Phosphoglycerate kinase 3 y_rev	0	0	s−1	0	0	0	0	0	0	0	0	0	0	0	0	0	0	0	0	0	0	0	0	0	0	0	0	0	0	0	0	0	0	0	0	0	0	0	0	0	0	0	0	0	0	0	0	0	0
Phosphoglycerate kinase 4 y	0	0	s−1	0	0	0	0	0	0	0	0	0	0	0	0	0	0	0	0	0	0	0	0	0	0	0	0	0	0	0	0	0	0	0	0	0	0	0	0	0	0	0	0	0	0	0	0	0	0
Glyceraldehyde-3-phosphate dehydrogenase 1 y	0	0	L2·mol−2·s−1	0	0	0	0	0	0	0	0	0	0	0	0	0	0	0	0	0	0	0	0	0	0	0	0	0	0	0	0	0	0	0	0	0	0	0	0	0	0	0	0	0	0	0	0	0	0
Glyceraldehyde-3-phosphate dehydrogenase 1 y_rev	0	0	s−1	0	0	0	0	0	0	0	0	0	0	0	0	0	0	0	0	0	0	0	0	0	0	0	0	0	0	0	0	0	0	0	0	0	0	0	0	0	0	0	0	0	0	0	0	0	0
Glyceraldehyde-3-phosphate dehydrogenase 2 y	0	0	s−1	0	0	0	0	0	0	0	0	0	0	0	0	0	0	0	0	0	0	0	0	0	0	0	0	0	0	0	0	0	0	0	0	0	0	0	0	0	0	0	0	0	0	0	0	0	0
Glyceraldehyde-3-phosphate dehydrogenase 3 y	0	0	L2·mol−2·s−1	0	0	0	0	0	0	0	0	0	0	0	0	0	0	0	0	0	0	0	0	0	0	0	0	0	0	0	0	0	0	0	0	0	0	0	0	0	0	0	0	0	0	0	0	0	0
Glyceraldehyde-3-phosphate dehydrogenase 3 y_rev	0	0	s−1	0	0	0	0	0	0	0	0	0	0	0	0	0	0	0	0	0	0	0	0	0	0	0	0	0	0	0	0	0	0	0	0	0	0	0	0	0	0	0	0	0	0	0	0	0	0
Glyceraldehyde-3-phosphate dehydrogenase 4 y	0	0	s−1	0	0	0	0	0	0	0	0	0	0	0	0	0	0	0	0	0	0	0	0	0	0	0	0	0	0	0	0	0	0	0	0	0	0	0	0	0	0	0	0	0	0	0	0	0	0
Triosephosphate isomerase 1 y	0	0	L·mol−1·s−1	0	0	0	0	0	0	0	0	0	0	0	0	0	0	0	0	0	0	0	0	0	0	0	0	0	0	0	0	0	0	0	0	0	0	0	0	0	0	0	0	0	0	0	0	0	0
Triosephosphate isomerase 1 y_rev	0	0	s−1	0	0	0	0	0	0	0	0	0	0	0	0	0	0	0	0	0	0	0	0	0	0	0	0	0	0	0	0	0	0	0	0	0	0	0	0	0	0	0	0	0	0	0	0	0	0
Triosephosphate isomerase 2 y	0	0	s−1	0	0	0	0	0	0	0	0	0	0	0	0	0	0	0	0	0	0	0	0	0	0	0	0	0	0	0	0	0	0	0	0	0	0	0	0	0	0	0	0	0	0	0	0	0	0
Triosephosphate isomerase 3 y	0	0	L·mol−1·s−1	0	0	0	0	0	0	0	0	0	0	0	0	0	0	0	0	0	0	0	0	0	0	0	0	0	0	0	0	0	0	0	0	0	0	0	0	0	0	0	0	0	0	0	0	0	0
Triosephosphate isomerase 3 y_rev	0	0	s−1	0	0	0	0	0	0	0	0	0	0	0	0	0	0	0	0	0	0	0	0	0	0	0	0	0	0	0	0	0	0	0	0	0	0	0	0	0	0	0	0	0	0	0	0	0	0
Triosephosphate isomerase 4 y	0	0	s−1	0	0	0	0	0	0	0	0	0	0	0	0	0	0	0	0	0	0	0	0	0	0	0	0	0	0	0	0	0	0	0	0	0	0	0	0	0	0	0	0	0	0	0	0	0	0
Aldolase 1a y	0	0	L2·mol−2·s−1	0	0	0	0	0	0	0	0	0	0	0	0	0	0	0	0	0	0	0	0	0	0	0	0	0	0	0	0	0	0	0	0	0	0	0	0	0	0	0	0	0	0	0	0	0	0
Aldolase 1a y_rev	0	0	s−1	0	0	0	0	0	0	0	0	0	0	0	0	0	0	0	0	0	0	0	0	0	0	0	0	0	0	0	0	0	0	0	0	0	0	0	0	0	0	0	0	0	0	0	0	0	0
Aldolase 2a y	0	0	s−1	0	0	0	0	0	0	0	0	0	0	0	0	0	0	0	0	0	0	0	0	0	0	0	0	0	0	0	0	0	0	0	0	0	0	0	0	0	0	0	0	0	0	0	0	0	0
Aldolase 3a y	0	0	L·mol−1·s−1	0	0	0	0	0	0	0	0	0	0	0	0	0	0	0	0	0	0	0	0	0	0	0	0	0	0	0	0	0	0	0	0	0	0	0	0	0	0	0	0	0	0	0	0	0	0
Aldolase 3a y_rev	0	0	s−1	0	0	0	0	0	0	0	0	0	0	0	0	0	0	0	0	0	0	0	0	0	0	0	0	0	0	0	0	0	0	0	0	0	0	0	0	0	0	0	0	0	0	0	0	0	0
Aldolase 4a y	0	0	s−1	0	0	0	0	0	0	0	0	0	0	0	0	0	0	0	0	0	0	0	0	0	0	0	0	0	0	0	0	0	0	0	0	0	0	0	0	0	0	0	0	0	0	0	0	0	0
Fructose-1,6-bisphosphatase 1 y	0	0	L·mol−1·s−1	0	0	0	0	0	0	0	0	0	0	0	0	0	0	0	0	0	0	0	0	0	0	0	0	0	0	0	0	0	0	0	0	0	0	0	0	0	0	0	0	0	0	0	0	0	0
Fructose-1,6-bisphosphatase 1 y_rev	0	0	s−1	0	0	0	0	0	0	0	0	0	0	0	0	0	0	0	0	0	0	0	0	0	0	0	0	0	0	0	0	0	0	0	0	0	0	0	0	0	0	0	0	0	0	0	0	0	0
Fructose-1,6-bisphosphatase 2 y	0	0	s−1	0	0	0	0	0	0	0	0	0	0	0	0	0	0	0	0	0	0	0	0	0	0	0	0	0	0	0	0	0	0	0	0	0	0	0	0	0	0	0	0	0	0	0	0	0	0
Transketolase 1a y	0	0	L2·mol−2·s−1	0	0	0	0	0	0	0	0	0	0	0	0	0	0	0	0	0	0	0	0	0	0	0	0	0	0	0	0	0	0	0	0	0	0	0	0	0	0	0	0	0	0	0	0	0	0
Transketolase 1a y_rev	0	0	s−1	0	0	0	0	0	0	0	0	0	0	0	0	0	0	0	0	0	0	0	0	0	0	0	0	0	0	0	0	0	0	0	0	0	0	0	0	0	0	0	0	0	0	0	0	0	0
Transketolase 2a y	0	0	s−1	0	0	0	0	0	0	0	0	0	0	0	0	0	0	0	0	0	0	0	0	0	0	0	0	0	0	0	0	0	0	0	0	0	0	0	0	0	0	0	0	0	0	0	0	0	0
Transketolase 3a y	0	0	L2·mol−2·s−1	0	0	0	0	0	0	0	0	0	0	0	0	0	0	0	0	0	0	0	0	0	0	0	0	0	0	0	0	0	0	0	0	0	0	0	0	0	0	0	0	0	0	0	0	0	0
Transketolase 3a y_rev	0	0	s−1	0	0	0	0	0	0	0	0	0	0	0	0	0	0	0	0	0	0	0	0	0	0	0	0	0	0	0	0	0	0	0	0	0	0	0	0	0	0	0	0	0	0	0	0	0	0
Transketolase 4a y	0	0	s−1	0	0	0	0	0	0	0	0	0	0	0	0	0	0	0	0	0	0	0	0	0	0	0	0	0	0	0	0	0	0	0	0	0	0	0	0	0	0	0	0	0	0	0	0	0	0
Aldolase 1b y	0	0	L2·mol−2·s−1	0	0	0	0	0	0	0	0	0	0	0	0	0	0	0	0	0	0	0	0	0	0	0	0	0	0	0	0	0	0	0	0	0	0	0	0	0	0	0	0	0	0	0	0	0	0
Aldolase 1b y_rev	0	0	s−1	0	0	0	0	0	0	0	0	0	0	0	0	0	0	0	0	0	0	0	0	0	0	0	0	0	0	0	0	0	0	0	0	0	0	0	0	0	0	0	0	0	0	0	0	0	0
Aldolase 2b y	0	0	s−1	0	0	0	0	0	0	0	0	0	0	0	0	0	0	0	0	0	0	0	0	0	0	0	0	0	0	0	0	0	0	0	0	0	0	0	0	0	0	0	0	0	0	0	0	0	0
Aldolase 3b y	0	0	L·mol−1·s−1	0	0	0	0	0	0	0	0	0	0	0	0	0	0	0	0	0	0	0	0	0	0	0	0	0	0	0	0	0	0	0	0	0	0	0	0	0	0	0	0	0	0	0	0	0	0
Aldolase 3b y_rev	0	0	s−1	0	0	0	0	0	0	0	0	0	0	0	0	0	0	0	0	0	0	0	0	0	0	0	0	0	0	0	0	0	0	0	0	0	0	0	0	0	0	0	0	0	0	0	0	0	0
Aldolase 4b y	0	0	s−1	0	0	0	0	0	0	0	0	0	0	0	0	0	0	0	0	0	0	0	0	0	0	0	0	0	0	0	0	0	0	0	0	0	0	0	0	0	0	0	0	0	0	0	0	0	0
Sedoheptulose-1,7-phosphatase 1 y	0	0	L·mol−1·s−1	0	0	0	0	0	0	0	0	0	0	0	0	0	0	0	0	0	0	0	0	0	0	0	0	0	0	0	0	0	0	0	0	0	0	0	0	0	0	0	0	0	0	0	0	0	0
Sedoheptulose-1,7-phosphatase 1 y_rev	0	0	s−1	0	0	0	0	0	0	0	0	0	0	0	0	0	0	0	0	0	0	0	0	0	0	0	0	0	0	0	0	0	0	0	0	0	0	0	0	0	0	0	0	0	0	0	0	0	0
Sedoheptulose-1,7-phosphatase 2 y	0	0	s−1	0	0	0	0	0	0	0	0	0	0	0	0	0	0	0	0	0	0	0	0	0	0	0	0	0	0	0	0	0	0	0	0	0	0	0	0	0	0	0	0	0	0	0	0	0	0
Transketolase 1b y	0	0	L2·mol−2·s−1	0	0	0	0	0	0	0	0	0	0	0	0	0	0	0	0	0	0	0	0	0	0	0	0	0	0	0	0	0	0	0	0	0	0	0	0	0	0	0	0	0	0	0	0	0	0
Transketolase 1b y_rev	0	0	s−1	0	0	0	0	0	0	0	0	0	0	0	0	0	0	0	0	0	0	0	0	0	0	0	0	0	0	0	0	0	0	0	0	0	0	0	0	0	0	0	0	0	0	0	0	0	0
Transketolase 2b y	0	0	s−1	0	0	0	0	0	0	0	0	0	0	0	0	0	0	0	0	0	0	0	0	0	0	0	0	0	0	0	0	0	0	0	0	0	0	0	0	0	0	0	0	0	0	0	0	0	0
Transketolase 3b y	0	0	L2·mol−2·s−1	0	0	0	0	0	0	0	0	0	0	0	0	0	0	0	0	0	0	0	0	0	0	0	0	0	0	0	0	0	0	0	0	0	0	0	0	0	0	0	0	0	0	0	0	0	0
Transketolase 3b y_rev	0	0	s−1	0	0	0	0	0	0	0	0	0	0	0	0	0	0	0	0	0	0	0	0	0	0	0	0	0	0	0	0	0	0	0	0	0	0	0	0	0	0	0	0	0	0	0	0	0	0
Transketolase 4b y	0	0	s−1	0	0	0	0	0	0	0	0	0	0	0	0	0	0	0	0	0	0	0	0	0	0	0	0	0	0	0	0	0	0	0	0	0	0	0	0	0	0	0	0	0	0	0	0	0	0
Ribulose-5-phosphate epimerase 1 y	0	0	L·mol−1·s−1	0	0	0	0	0	0	0	0	0	0	0	0	0	0	0	0	0	0	0	0	0	0	0	0	0	0	0	0	0	0	0	0	0	0	0	0	0	0	0	0	0	0	0	0	0	0
Ribulose-5-phosphate epimerase 1 y_rev	0	0	s−1	0	0	0	0	0	0	0	0	0	0	0	0	0	0	0	0	0	0	0	0	0	0	0	0	0	0	0	0	0	0	0	0	0	0	0	0	0	0	0	0	0	0	0	0	0	0
Ribulose-5-phosphate epimerase 2 y	0	0	s−1	0	0	0	0	0	0	0	0	0	0	0	0	0	0	0	0	0	0	0	0	0	0	0	0	0	0	0	0	0	0	0	0	0	0	0	0	0	0	0	0	0	0	0	0	0	0
Ribulose-5-phosphate epimerase 3 y	0	0	L·mol−1·s−1	0	0	0	0	0	0	0	0	0	0	0	0	0	0	0	0	0	0	0	0	0	0	0	0	0	0	0	0	0	0	0	0	0	0	0	0	0	0	0	0	0	0	0	0	0	0
Ribulose-5-phosphate epimerase 3 y_rev	0	0	s−1	0	0	0	0	0	0	0	0	0	0	0	0	0	0	0	0	0	0	0	0	0	0	0	0	0	0	0	0	0	0	0	0	0	0	0	0	0	0	0	0	0	0	0	0	0	0
Ribulose-5-phosphate epimerase 4 y	0	0	s−1	0	0	0	0	0	0	0	0	0	0	0	0	0	0	0	0	0	0	0	0	0	0	0	0	0	0	0	0	0	0	0	0	0	0	0	0	0	0	0	0	0	0	0	0	0	0
Ribose-5-phosphate isomerase 1 y	0	0	L·mol−1·s−1	0	0	0	0	0	0	0	0	0	0	0	0	0	0	0	0	0	0	0	0	0	0	0	0	0	0	0	0	0	0	0	0	0	0	0	0	0	0	0	0	0	0	0	0	0	0
Ribose-5-phosphate isomerase 1 y_rev	0	0	s−1	0	0	0	0	0	0	0	0	0	0	0	0	0	0	0	0	0	0	0	0	0	0	0	0	0	0	0	0	0	0	0	0	0	0	0	0	0	0	0	0	0	0	0	0	0	0
Ribose-5-phosphate isomerase 2 y	0	0	s−1	0	0	0	0	0	0	0	0	0	0	0	0	0	0	0	0	0	0	0	0	0	0	0	0	0	0	0	0	0	0	0	0	0	0	0	0	0	0	0	0	0	0	0	0	0	0
Ribose-5-phosphate isomerase 3 y	0	0	L·mol−1·s−1	0	0	0	0	0	0	0	0	0	0	0	0	0	0	0	0	0	0	0	0	0	0	0	0	0	0	0	0	0	0	0	0	0	0	0	0	0	0	0	0	0	0	0	0	0	0
Ribose-5-phosphate isomerase 3 y_rev	0	0	s−1	0	0	0	0	0	0	0	0	0	0	0	0	0	0	0	0	0	0	0	0	0	0	0	0	0	0	0	0	0	0	0	0	0	0	0	0	0	0	0	0	0	0	0	0	0	0
Ribose-5-phosphate isomerase 4 y	0	0	s−1	0	0	0	0	0	0	0	0	0	0	0	0	0	0	0	0	0	0	0	0	0	0	0	0	0	0	0	0	0	0	0	0	0	0	0	0	0	0	0	0	0	0	0	0	0	0
Phosphoribulokinase 1 y	0	0	L2·mol−2·s−1	0	0	0	0	0	0	0	0	0	0	0	0	0	0	0	0	0	0	0	0	0	0	0	0	0	0	0	0	0	0	0	0	0	0	0	0	0	0	0	0	0	0	0	0	0	0
Phosphoribulokinase 1 y_rev	0	0	s−1	0	0	0	0	0	0	0	0	0	0	0	0	0	0	0	0	0	0	0	0	0	0	0	0	0	0	0	0	0	0	0	0	0	0	0	0	0	0	0	0	0	0	0	0	0	0
Phosphoribulokinase 2 y	0	0	s−1	0	0	0	0	0	0	0	0	0	0	0	0	0	0	0	0	0	0	0	0	0	0	0	0	0	0	0	0	0	0	0	0	0	0	0	0	0	0	0	0	0	0	0	0	0	0
Phosphoglucoisomerase 1 y	0	0	L·mol−1·s−1	0	0	0	0	0	0	0	0	0	0	0	0	0	0	0	0	0	0	0	0	0	0	0	0	0	0	0	0	0	0	0	0	0	0	0	0	0	0	0	0	0	0	0	0	0	0
Phosphoglucoisomerase 1 y_rev	0	0	s−1	0	0	0	0	0	0	0	0	0	0	0	0	0	0	0	0	0	0	0	0	0	0	0	0	0	0	0	0	0	0	0	0	0	0	0	0	0	0	0	0	0	0	0	0	0	0
Phosphoglucoisomerase 2 y	0	0	s−1	0	0	0	0	0	0	0	0	0	0	0	0	0	0	0	0	0	0	0	0	0	0	0	0	0	0	0	0	0	0	0	0	0	0	0	0	0	0	0	0	0	0	0	0	0	0
Phosphoglucoisomerase 3 y	0	0	L·mol−1·s−1	0	0	0	0	0	0	0	0	0	0	0	0	0	0	0	0	0	0	0	0	0	0	0	0	0	0	0	0	0	0	0	0	0	0	0	0	0	0	0	0	0	0	0	0	0	0
Phosphoglucoisomerase 3 y_rev	0	0	s−1	0	0	0	0	0	0	0	0	0	0	0	0	0	0	0	0	0	0	0	0	0	0	0	0	0	0	0	0	0	0	0	0	0	0	0	0	0	0	0	0	0	0	0	0	0	0
Phosphoglucoisomerase 4 y	0	0	s−1	0	0	0	0	0	0	0	0	0	0	0	0	0	0	0	0	0	0	0	0	0	0	0	0	0	0	0	0	0	0	0	0	0	0	0	0	0	0	0	0	0	0	0	0	0	0
Phosphoglucomutase 1 y	0	0	L·mol−1·s−1	0	0	0	0	0	0	0	0	0	0	0	0	0	0	0	0	0	0	0	0	0	0	0	0	0	0	0	0	0	0	0	0	0	0	0	0	0	0	0	0	0	0	0	0	0	0
Phosphoglucomutase 1 y_rev	0	0	s−1	0	0	0	0	0	0	0	0	0	0	0	0	0	0	0	0	0	0	0	0	0	0	0	0	0	0	0	0	0	0	0	0	0	0	0	0	0	0	0	0	0	0	0	0	0	0
Phosphoglucomutase 2 y	0	0	s−1	0	0	0	0	0	0	0	0	0	0	0	0	0	0	0	0	0	0	0	0	0	0	0	0	0	0	0	0	0	0	0	0	0	0	0	0	0	0	0	0	0	0	0	0	0	0
Phosphoglucomutase 3 y	0	0	L·mol−1·s−1	0	0	0	0	0	0	0	0	0	0	0	0	0	0	0	0	0	0	0	0	0	0	0	0	0	0	0	0	0	0	0	0	0	0	0	0	0	0	0	0	0	0	0	0	0	0
Phosphoglucomutase 3 y_rev	0	0	s−1	0	0	0	0	0	0	0	0	0	0	0	0	0	0	0	0	0	0	0	0	0	0	0	0	0	0	0	0	0	0	0	0	0	0	0	0	0	0	0	0	0	0	0	0	0	0
Phosphoglucomutase 4 y	0	0	s−1	0	0	0	0	0	0	0	0	0	0	0	0	0	0	0	0	0	0	0	0	0	0	0	0	0	0	0	0	0	0	0	0	0	0	0	0	0	0	0	0	0	0	0	0	0	0
Glucose-1-phosphate adenylyltransferase 1 y	0	0	L2·mol−2·s−1	0	0	0	0	0	0	0	0	0	0	0	0	0	0	0	0	0	0	0	0	0	0	0	0	0	0	0	0	0	0	0	0	0	0	0	0	0	0	0	0	0	0	0	0	0	0
Glucose-1-phosphate adenylyltransferase 1 y_rev	0	0	s−1	0	0	0	0	0	0	0	0	0	0	0	0	0	0	0	0	0	0	0	0	0	0	0	0	0	0	0	0	0	0	0	0	0	0	0	0	0	0	0	0	0	0	0	0	0	0
Glucose-1-phosphate adenylyltransferase 2 y	0	0	s−1	0	0	0	0	0	0	0	0	0	0	0	0	0	0	0	0	0	0	0	0	0	0	0	0	0	0	0	0	0	0	0	0	0	0	0	0	0	0	0	0	0	0	0	0	0	0
Glucose-1-phosphate adenylyltransferase 3 y	0	0	L2·mol−2·s−1	0	0	0	0	0	0	0	0	0	0	0	0	0	0	0	0	0	0	0	0	0	0	0	0	0	0	0	0	0	0	0	0	0	0	0	0	0	0	0	0	0	0	0	0	0	0
Glucose-1-phosphate adenylyltransferase 3 y_rev	0	0	s−1	0	0	0	0	0	0	0	0	0	0	0	0	0	0	0	0	0	0	0	0	0	0	0	0	0	0	0	0	0	0	0	0	0	0	0	0	0	0	0	0	0	0	0	0	0	0
Glucose-1-phosphate adenylyltransferase 4 y	0	0	s−1	0	0	0	0	0	0	0	0	0	0	0	0	0	0	0	0	0	0	0	0	0	0	0	0	0	0	0	0	0	0	0	0	0	0	0	0	0	0	0	0	0	0	0	0	0	0
ADPGstore y	0	0	s−1	0	0	0	0	0	0	0	0	0	0	0	0	0	0	0	0	0	0	0	0	0	0	0	0	0	0	0	0	0	0	0	0	0	0	0	0	0	0	0	0	0	0	0	0	0	0
ADPGstore y_rev	0	0	µmol·L−1·s−1	0	0	0	0	0	0	0	0	0	0	0	0	0	0	0	0	0	0	0	0	0	0	0	0	0	0	0	0	0	0	0	0	0	0	0	0	0	0	0	0	0	0	0	0	0	0
Diffusion RuBP	9990.93	85.5934	s−1	10000	10000	10000	10000	10000	10000	10000	10000	10000	10000	10000	10000	10000	10000	10000	10000	10000	10000	10000	10000	10000	10000	10000	10000	10000	10000	10000	10000	10000	10000	10000	10000	10000	10000	10000	10000	10000	10000	10000	10000	10000	10000	10000	10000	10000	10000
Diffusion RuBP_rev	9482.11	1782.03	s−1	10000	10000	10000	10000	10000	10000	10000	10000	10000	10000	10000	10000	10000	10000	10000	10000	10000	10000	1580.48	10000	10000	10000	10000	10000	10000	10000	10000	10000	10000	10000	10000	10000	10000	10000	8736.3	10000	10000	10000	10000	10000	10000	10000	10000	10000	10000	10000
Diffusion 3PGA	0.496009	0.282962	s−1	0.406704	0.811461	0.708488	0.6689	0.693418	0.475993	0.0449959	0.430713	0.806015	0.608617	0.660199	0.67247	0.714049	0.887719	0.910816	0.0136842	0.609571	0.88413	0.977471	0.495805	0.323926	0.657505	0.461294	0.434111	0.596898	0.183611	0.459412	0.582341	0.0353764	0.152762	0.0383148	0.0884314	0.524515	0.729157	0.01308	0.173501	0.818442	0.520245	0.220114	0.569836	0.641336	0.00676772	0.317734	0.837841	0.317943	0.0326793
Diffusion 3PGA_rev	0.701372	0.282962	s−1	0.612068	1.01683	0.913838	0.87426	0.89878	0.681354	0.250371	0.636076	1.01138	0.813996	0.865567	0.877826	0.919411	1.09307	1.11618	0.219038	0.814948	1.0895	1.18284	0.701156	0.529287	0.862857	0.666648	0.639472	0.802253	0.38897	0.664791	0.787707	0.24075	0.358142	0.243674	0.293806	0.72989	0.934526	0.218435	0.378858	1.02382	0.725623	0.425483	0.775186	0.846697	0.21213	0.523086	1.04319	0.523299	0.23803
Diffusion GAP	0	0	s−1	0	0	0	0	0	0	0	0	0	0	0	0	0	0	0	0	0	0	0	0	0	0	0	0	0	0	0	0	0	0	0	0	0	0	0	0	0	0	0	0	0	0	0	0	0	0
Diffusion GAP_rev	0	0	s−1	0	0	0	0	0	0	0	0	0	0	0	0	0	0	0	0	0	0	0	0	0	0	0	0	0	0	0	0	0	0	0	0	0	0	0	0	0	0	0	0	0	0	0	0	0	0
Diffusion DHAP	0	0	s−1	0	0	0	0	0	0	0	0	0	0	0	0	0	0	0	0	0	0	0	0	0	0	0	0	0	0	0	0	0	0	0	0	0	0	0	0	0	0	0	0	0	0	0	0	0	0
Diffusion DHAP_rev	0	0	s−1	0	0	0	0	0	0	0	0	0	0	0	0	0	0	0	0	0	0	0	0	0	0	0	0	0	0	0	0	0	0	0	0	0	0	0	0	0	0	0	0	0	0	0	0	0	0
Diffusion FBP	0	0	s−1	0	0	0	0	0	0	0	0	0	0	0	0	0	0	0	0	0	0	0	0	0	0	0	0	0	0	0	0	0	0	0	0	0	0	0	0	0	0	0	0	0	0	0	0	0	0
Diffusion FBP_rev	0	0	s−1	0	0	0	0	0	0	0	0	0	0	0	0	0	0	0	0	0	0	0	0	0	0	0	0	0	0	0	0	0	0	0	0	0	0	0	0	0	0	0	0	0	0	0	0	0	0
Diffusion F6P	0	0	s−1	0	0	0	0	0	0	0	0	0	0	0	0	0	0	0	0	0	0	0	0	0	0	0	0	0	0	0	0	0	0	0	0	0	0	0	0	0	0	0	0	0	0	0	0	0	0
Diffusion F6P_rev	0	0	s−1	0	0	0	0	0	0	0	0	0	0	0	0	0	0	0	0	0	0	0	0	0	0	0	0	0	0	0	0	0	0	0	0	0	0	0	0	0	0	0	0	0	0	0	0	0	0
Diffusion E4P	0	0	s−1	0	0	0	0	0	0	0	0	0	0	0	0	0	0	0	0	0	0	0	0	0	0	0	0	0	0	0	0	0	0	0	0	0	0	0	0	0	0	0	0	0	0	0	0	0	0
Diffusion E4P_rev	0	0	s−1	0	0	0	0	0	0	0	0	0	0	0	0	0	0	0	0	0	0	0	0	0	0	0	0	0	0	0	0	0	0	0	0	0	0	0	0	0	0	0	0	0	0	0	0	0	0
Diffusion Xu5P	0	0	s−1	0	0	0	0	0	0	0	0	0	0	0	0	0	0	0	0	0	0	0	0	0	0	0	0	0	0	0	0	0	0	0	0	0	0	0	0	0	0	0	0	0	0	0	0	0	0
Diffusion Xu5P_rev	0	0	s−1	0	0	0	0	0	0	0	0	0	0	0	0	0	0	0	0	0	0	0	0	0	0	0	0	0	0	0	0	0	0	0	0	0	0	0	0	0	0	0	0	0	0	0	0	0	0
Diffusion SBP	0	0	s−1	0	0	0	0	0	0	0	0	0	0	0	0	0	0	0	0	0	0	0	0	0	0	0	0	0	0	0	0	0	0	0	0	0	0	0	0	0	0	0	0	0	0	0	0	0	0
Diffusion SBP_rev	0	0	s−1	0	0	0	0	0	0	0	0	0	0	0	0	0	0	0	0	0	0	0	0	0	0	0	0	0	0	0	0	0	0	0	0	0	0	0	0	0	0	0	0	0	0	0	0	0	0
Diffusion S7P	0	0	s−1	0	0	0	0	0	0	0	0	0	0	0	0	0	0	0	0	0	0	0	0	0	0	0	0	0	0	0	0	0	0	0	0	0	0	0	0	0	0	0	0	0	0	0	0	0	0
Diffusion S7P_rev	0	0	s−1	0	0	0	0	0	0	0	0	0	0	0	0	0	0	0	0	0	0	0	0	0	0	0	0	0	0	0	0	0	0	0	0	0	0	0	0	0	0	0	0	0	0	0	0	0	0
Diffusion R5P	0	0	s−1	0	0	0	0	0	0	0	0	0	0	0	0	0	0	0	0	0	0	0	0	0	0	0	0	0	0	0	0	0	0	0	0	0	0	0	0	0	0	0	0	0	0	0	0	0	0
Diffusion R5P_rev	0	0	s−1	0	0	0	0	0	0	0	0	0	0	0	0	0	0	0	0	0	0	0	0	0	0	0	0	0	0	0	0	0	0	0	0	0	0	0	0	0	0	0	0	0	0	0	0	0	0
Diffusion Ru5P	0	0	s−1	0	0	0	0	0	0	0	0	0	0	0	0	0	0	0	0	0	0	0	0	0	0	0	0	0	0	0	0	0	0	0	0	0	0	0	0	0	0	0	0	0	0	0	0	0	0
Diffusion Ru5P_rev	0	0	s−1	0	0	0	0	0	0	0	0	0	0	0	0	0	0	0	0	0	0	0	0	0	0	0	0	0	0	0	0	0	0	0	0	0	0	0	0	0	0	0	0	0	0	0	0	0	0
Diffusion BPGA	0	0	s−1	0	0	0	0	0	0	0	0	0	0	0	0	0	0	0	0	0	0	0	0	0	0	0	0	0	0	0	0	0	0	0	0	0	0	0	0	0	0	0	0	0	0	0	0	0	0
Diffusion BPGA_rev	0	0	s−1	0	0	0	0	0	0	0	0	0	0	0	0	0	0	0	0	0	0	0	0	0	0	0	0	0	0	0	0	0	0	0	0	0	0	0	0	0	0	0	0	0	0	0	0	0	0
Diffusion G1P	0	0	s−1	0	0	0	0	0	0	0	0	0	0	0	0	0	0	0	0	0	0	0	0	0	0	0	0	0	0	0	0	0	0	0	0	0	0	0	0	0	0	0	0	0	0	0	0	0	0
Diffusion G1P_rev	0	0	s−1	0	0	0	0	0	0	0	0	0	0	0	0	0	0	0	0	0	0	0	0	0	0	0	0	0	0	0	0	0	0	0	0	0	0	0	0	0	0	0	0	0	0	0	0	0	0
Diffusion G6P	0	0	s−1	0	0	0	0	0	0	0	0	0	0	0	0	0	0	0	0	0	0	0	0	0	0	0	0	0	0	0	0	0	0	0	0	0	0	0	0	0	0	0	0	0	0	0	0	0	0
Diffusion G6P_rev	0	0	s−1	0	0	0	0	0	0	0	0	0	0	0	0	0	0	0	0	0	0	0	0	0	0	0	0	0	0	0	0	0	0	0	0	0	0	0	0	0	0	0	0	0	0	0	0	0	0
Diffusion ADPG	0	0	s−1	0	0	0	0	0	0	0	0	0	0	0	0	0	0	0	0	0	0	0	0	0	0	0	0	0	0	0	0	0	0	0	0	0	0	0	0	0	0	0	0	0	0	0	0	0	0
Diffusion ADPG_rev	0	0	s−1	0	0	0	0	0	0	0	0	0	0	0	0	0	0	0	0	0	0	0	0	0	0	0	0	0	0	0	0	0	0	0	0	0	0	0	0	0	0	0	0	0	0	0	0	0	0
FNR	10000	0	s−1	10000	10000	10000	10000	10000	10000	10000	10000	10000	10000	10000	10000	10000	10000	10000	10000	10000	10000	10000	10000	10000	10000	10000	10000	10000	10000	10000	10000	10000	10000	10000	10000	10000	10000	10000	10000	10000	10000	10000	10000	10000	10000	10000	10000	10000	10000
ATPase	1279.61	1561.62	s−1	3215.89	699.533	859.011	1989.2	1020.68	8201.14	2493.14	2024.44	640.869	2041.39	998.795	9078.4	1643.24	614.068	5194.24	2291.4	2258.44	603.913	698.211	5290.14	783.411	1849.97	498.137	1250	3024.11	706.617	833.197	2479.91	7552.19	669.541	10000	8231.95	2199.16	4724.73	606.648	1496.53	591.309	1267.69	2662.21	2082.04	989.376	937.068	4786.88	1227.83	536.819	2885.95
Diffusion ADP	0	0	s−1	0	0	0	0	0	0	0	0	0	0	0	0	0	0	0	0	0	0	0	0	0	0	0	0	0	0	0	0	0	0	0	0	0	0	0	0	0	0	0	0	0	0	0	0	0	0
Diffusion ADP_rev	0	0	s−1	0	0	0	0	0	0	0	0	0	0	0	0	0	0	0	0	0	0	0	0	0	0	0	0	0	0	0	0	0	0	0	0	0	0	0	0	0	0	0	0	0	0	0	0	0	0
Diffusion ATP	0	0	s−1	0	0	0	0	0	0	0	0	0	0	0	0	0	0	0	0	0	0	0	0	0	0	0	0	0	0	0	0	0	0	0	0	0	0	0	0	0	0	0	0	0	0	0	0	0	0
Diffusion ATP_rev	0	0	s−1	0	0	0	0	0	0	0	0	0	0	0	0	0	0	0	0	0	0	0	0	0	0	0	0	0	0	0	0	0	0	0	0	0	0	0	0	0	0	0	0	0	0	0	0	0	0
Diffusion NADP	0	0	s−1	0	0	0	0	0	0	0	0	0	0	0	0	0	0	0	0	0	0	0	0	0	0	0	0	0	0	0	0	0	0	0	0	0	0	0	0	0	0	0	0	0	0	0	0	0	0
Diffusion NADP_rev	0	0	s−1	0	0	0	0	0	0	0	0	0	0	0	0	0	0	0	0	0	0	0	0	0	0	0	0	0	0	0	0	0	0	0	0	0	0	0	0	0	0	0	0	0	0	0	0	0	0
Diffusion NADPH	0	0	s−1	0	0	0	0	0	0	0	0	0	0	0	0	0	0	0	0	0	0	0	0	0	0	0	0	0	0	0	0	0	0	0	0	0	0	0	0	0	0	0	0	0	0	0	0	0	0
Diffusion NADPH_rev	0	0	s−1	0	0	0	0	0	0	0	0	0	0	0	0	0	0	0	0	0	0	0	0	0	0	0	0	0	0	0	0	0	0	0	0	0	0	0	0	0	0	0	0	0	0	0	0	0	0
Diffusion DHAP s-c	0.958989	0.565593	s−1	1.628	0.336465	1.03962	0.289164	1.93608	0.142588	0.681152	1.32999	1.61573	0.0379488	1.29302	1.07567	0.0675425	0.254963	0.0524985	0.664126	0.237366	0.736361	1.28228	1.27848	1.80461	1.40677	1.0545	2.0447	0.508591	1.16425	1.31479	1.29216	0.685196	0.550908	0.785444	1.5933	0.507794	0.234538	1.02166	1.19025	0.0319946	1.26641	1.91781	1.13854	1.29348	0.224181	0.227663	0.90665	0.820886	0.730563
Diffusion DHAP s-c_rev	558.655	263.972	µmol·L−1·s−1	950.813	113.326	663.335	518.525	946.71	314.763	751.519	872.196	854.447	348.653	683.024	469.312	512.123	870.544	303.568	699.956	274.001	626.246	752.632	856.323	581.394	734.967	777.817	779.963	575.159	518.053	764.755	812.04	821.726	646.11	512.355	991.64	94.5353	316.26	529.429	373.865	809.429	833.505	962.88	452.381	532.752	402.997	426.385	384.338	642.31	530.61
Diffusion BPGA s-c	538.605	287.487	s−1	272.522	748.666	915.706	460.486	565.031	665.376	358.971	250.5	910.864	939.295	832.912	530.141	941.025	218.591	120.012	677.449	286.292	311.024	59.6243	95.6686	1005.73	1085.15	710.505	1010.22	464.265	231.284	557.454	250.797	1019.27	251.92	816.5	44.8876	680.358	584.486	544.751	54.4614	753.245	629.79	626.38	949.795	543.28	53.2913	980.969	350.061	510.361	316.95
Diffusion BPGA s-c_rev	539.504	263.579	µmol·L−1·s−1	287.945	671.499	717.908	408.075	477.662	567.364	360.361	270.15	810.308	755.545	732.572	567.364	883.844	297.389	323.288	707.066	294.523	255.98	153.01	299.702	863.001	944.177	581.157	880.047	449.611	208.146	519.902	277.324	980.129	331.141	742.406	60.4786	733.982	614.052	475.46	113.377	899.045	582.079	789.287	737.464	404.01	15.4706	968.44	443.514	529.462	505.377
Diffusion GAP s-c	26.0727	12.2647	s−1	34.9999	30.3183	29.9221	28.7487	44.1955	37.3376	31.4264	19.8816	17.9381	35.5127	16.3555	37.1679	43.3151	42.6246	38.8451	31.9194	45.3735	41.3212	27.3437	40.1984	24.5226	33.3757	36.4551	8.17267	21.0416	23.4003	23.0604	27.3416	37.076	41.3863	34.6966	19.838	33.6439	8.66519	33.7579	2.02284	42.908	22.0947	26.789	41.9778	16.762	23.9543	21.1175	16.0913	41.5435	9.98497
Diffusion GAP s-c_rev	421.721	260.333	µmol·L−1·s−1	519.102	548.433	107.793	85.4821	713.556	352.13	184.073	134.173	120.123	106.536	92.5053	877.913	379.857	238.431	859.9	351.171	757.276	428.797	507.146	908.556	557.199	426.953	242.778	141.966	40.5075	398.06	243.447	352.435	274.253	581.47	473.159	92.7358	969.28	11.808	507.964	222.929	429.774	123.52	822.153	603.948	122.707	23.5301	154.899	506.442	640.755	329.068
Diffusion 3PGA s-c	0.620408	0.313403	s−1	0.816286	0.222112	0.270353	0.461181	0.756406	0.390662	0.953914	0.551163	0.17903	0.143682	0.818276	0.890835	0.585564	0.519767	0.256305	0.259295	0.56558	1.01645	0.182135	0.252329	0.319385	1.02181	0.888023	0.529478	0.375495	0.738842	1.11236	0.479563	0.42676	0.972603	0.155778	0.165683	1.04619	0.934699	0.815401	0.462468	0.443058	1.0278	0.433142	0.131344	0.967712	0.936807	0.857853	0.286928	1.18389	1.01008
Diffusion 3PGA s-c_rev	475.073	268.21	µmol·L−1·s−1	649.413	198.39	344.958	400.906	675.786	368.862	771.955	423.369	171.067	221.912	717.273	667.739	468.139	340.547	2.42752	129.291	443.79	885.416	55.0613	0.468898	323.304	907.368	815.978	487.675	290.497	626.259	927.064	356.036	309.146	719.369	133.329	120.275	769.169	707.609	709.294	326.59	161.498	859.459	147.246	239.15	907.953	823.773	649.766	117.743	934.953	636.043
[truncated: 954 more columns]

## Sheet: F_KM_estimation
Supplementary Table 5F. Estimates of KM value for Rubisco in the stroma and pyrenoid.
KM RuBP estimates:
given v=kcat*E0*substrate/(KM+substrate)
we calculate KM = ((kcat*E0*substrate)/v) - substrate
Note that the model reaction related to RubisCo, actually models two Rubisco subunits.
	average	standard deviation	SAMPLE 1	SAMPLE 2	SAMPLE 3	SAMPLE 4	SAMPLE 5	SAMPLE 6	SAMPLE 7	SAMPLE 8	SAMPLE 9	SAMPLE 10	SAMPLE 11	SAMPLE 12	SAMPLE 13	SAMPLE 14	SAMPLE 15	SAMPLE 16	SAMPLE 17	SAMPLE 18	SAMPLE 19	SAMPLE 20	SAMPLE 21	SAMPLE 22	SAMPLE 23	SAMPLE 24	SAMPLE 25	SAMPLE 26	SAMPLE 27	SAMPLE 28	SAMPLE 29	SAMPLE 30	SAMPLE 31	SAMPLE 32	SAMPLE 33	SAMPLE 34	SAMPLE 35	SAMPLE 36	SAMPLE 37	SAMPLE 38	SAMPLE 39	SAMPLE 40	SAMPLE 41	SAMPLE 42	SAMPLE 43	SAMPLE 44	SAMPLE 45	SAMPLE 46	SAMPLE 47
v stroma			311.336	311.336	311.342	311.338	311.337	311.337	311.331	311.337	311.334	311.33	311.335	311.34	311.337	311.342	311.337	311.341	311.331	311.335	311.335	311.342	311.337	311.341	311.341	311.337	311.34	311.338	311.33	311.336	311.332	311.33	311.338	311.332	311.332	311.334	311.34	311.339	311.33	311.33	311.334	311.342	311.337	311.337	311.341	311.341	311.339	311.342	311.339
kcat stroma			5.8	5.8	5.8	5.8	5.8	5.8	5.8	5.8	5.8	5.8	5.8	5.8	5.8	5.8	5.8	5.8	5.8	5.8	5.8	5.8	5.8	5.8	5.8	5.8	5.8	5.8	5.8	5.8	5.8	5.8	5.8	5.8	5.8	5.8	5.8	5.8	5.8	5.8	5.8	5.8	5.8	5.8	5.8	5.8	5.8	5.8	5.8
v pyrenoid			86.6636	86.6644	86.6582	86.662	86.6627	86.6628	86.6687	86.6632	86.6659	86.6701	86.6653	86.6604	86.6628	86.6585	86.663	86.6594	86.6694	86.6646	86.6652	86.6582	86.6626	86.6586	86.6594	86.6626	86.6599	86.6619	86.6701	86.6644	86.6679	86.6703	86.6621	86.6683	86.6683	86.6659	86.6599	86.6607	86.6697	86.6701	86.6656	86.6582	86.6628	86.6632	86.6586	86.6586	86.6606	86.6582	86.661
kcat pyrenoid			0.0712086	0.0712086	0.0712086	0.0712086	0.0712086	0.0712086	0.0712086	0.0712086	0.0712086	0.0712086	0.0712086	0.0712086	0.0712086	0.0712086	0.0712086	0.0712086	0.0712086	0.0712086	0.0712086	0.0712086	0.0712086	0.0712086	0.0712086	0.0712086	0.0712086	0.0712086	0.0712086	0.0712086	0.0712086	0.0712086	0.0712086	0.0712086	0.0712086	0.0712086	0.0712086	0.0712086	0.0712086	0.0712086	0.0712086	0.0712086	0.0712086	0.0712086	0.0712086	0.0712086	0.0712086	0.0712086	0.0712086
E0 stroma			80.9602	67.447	85.8854	82.9936	68.5372	99.3844	83.5833	69.3642	82.0607	66.4914	92.978	68.3144	85.1202	77.6469	88.0411	67.8037	67.7431	59.8918	233.62	70.8909	67.3861	91.6753	69.1132	77.7735	64.0427	69.0927	96.5907	75.2913	100.264	240.751	75.2531	105.463	63.8221	76.6886	99.876	76.2831	78.9297	131.026	69.2337	62.2141	103.403	82.1371	62.2423	124.784	61.0889	65.8627	92.3954
RuBP stroma			0.0843557	0.0928473	0.0489209	0.0311409	0.0698336	0.0215475	0.0862882	0.0981797	0.0774803	0.0883041	0.0898827	0.0764231	0.0567019	0.0868992	0.0304642	0.0860088	0.0359852	0.0654688	0.010247	0.0639582	0.0904487	0.0298316	0.0640739	0.0335117	0.0970163	0.0275204	0.0899923	0.0989131	0.0276424	0.0494049	0.0912877	0.023753	0.0767231	0.0723194	0.0174023	0.0776203	0.0923903	0.0619103	0.0702924	0.0700287	0.0416336	0.052615	0.0776158	0.0201541	0.0718043	0.0853124	0.0128586
E0 pyrenoid			1228.84	1222.11	1230.54	1229.48	1222.78	1240.55	1229.65	1222.74	1230.55	1221.62	1238.82	1222.09	1229.63	1228.8	1232.04	1222.04	1222.85	1219.27	1303.33	1223.51	1222.13	1233.51	1222.6	1227.36	1220.67	1224.07	1238.87	1225.58	1238.63	1280.29	1226.2	1244.8	1220.9	1230.36	1242.4	1225.93	1227.44	1261.34	1223.94	1219.99	1238.37	1228.46	1219.94	1257.14	1219.61	1221.13	1232.19
RuBP pyrenoid			0.0756894	0.0841809	0.0402551	0.0224747	0.0611673	0.0128812	0.0776213	0.0895134	0.0688138	0.0796371	0.0812162	0.0677571	0.0480356	0.0782333	0.0217979	0.0773429	0.0273182	0.0568024	0.01	0.0552924	0.0817824	0.0211658	0.0554079	0.0248454	0.0883503	0.0188542	0.0813253	0.0902467	0.0189756	0.0407379	0.0826215	0.0150862	0.0680563	0.0636528	0.01	0.0689543	0.0837233	0.0532432	0.0616258	0.0613628	0.0329673	0.0439487	0.0689499	0.0114882	0.0631383	0.0766466	0.01
KM stroma	0.0330741	0.0280179	0.0428728	0.0238152	0.0293507	0.0170063	0.0193301	0.0183469	0.0480736	0.028689	0.0409678	0.0210799	0.0658059	0.020836	0.0332121	0.0387994	0.0195015	0.0226309	0.00942937	0.00757802	0.0343501	0.0205069	0.0230967	0.0211156	0.0184224	0.0150423	0.01873	0.0079024	0.0719454	0.0398257	0.0239906	0.172183	0.0366895	0.0229153	0.0144995	0.0310012	0.0149765	0.0326854	0.043464	0.0892113	0.0203699	0.0111339	0.0385662	0.0278944	0.012381	0.0266963	0.00991165	0.0193625	0.00927433
KM pyrenoid	0.000537474	0.000480634	0.000734214	0.000350201	0.000448992	0.000230096	0.000288958	0.000248953	0.000799932	0.00041991	0.000761897	0.000293967	0.00145172	0.000283582	0.000497254	0.000760684	0.000268859	0.00032173	0.000128588	0.000103687	0.000708851	0.000297244	0.0003432	0.000287755	0.000255813	0.000210962	0.000267143	0.000109223	0.00145254	0.000632151	0.000335649	0.00211395	0.000623645	0.000343297	0.000212158	0.000694815	0.000208782	0.000505861	0.000709322	0.00193375	0.000347757	0.000152562	0.000578246	0.000412566	0.000168272	0.000379225	0.000135631	0.000262297	0.000124807
[truncated: 953 more columns]
