# Supplementary material for: Effects of microcompartmentation on flux distribution and metabolic pools in Chlamydomonas reinhardtii chloroplasts
Source: eLife journal article supplement (doi:10.7554/elife.37960), 2018-10-11
Supplement: supp [file elife-37960-supp-v1.zip › elife_poa_e37960_Supplementary_File_6.xlsx]

## Sheet: A_concentration
Supplementary Table 6A. Simulated metabolite concentration in µM over 1,000 samples. The full metabolite name is given in Supplementary file 3. [s] denotes the concentration in the stroma, [y] the concentration in the pyrenoid.
metabolite	average	standard deviation	SAMPLE 1	SAMPLE 2	SAMPLE 3	SAMPLE 4	SAMPLE 5	SAMPLE 6	SAMPLE 7	SAMPLE 8	SAMPLE 9	SAMPLE 10	SAMPLE 11	SAMPLE 12	SAMPLE 13	SAMPLE 14	SAMPLE 15	SAMPLE 16	SAMPLE 17	SAMPLE 18	SAMPLE 19	SAMPLE 20	SAMPLE 21	SAMPLE 22	SAMPLE 23	SAMPLE 24	SAMPLE 25	SAMPLE 26	SAMPLE 27	SAMPLE 28	SAMPLE 29	SAMPLE 30	SAMPLE 31	SAMPLE 32	SAMPLE 33	SAMPLE 34	SAMPLE 35	SAMPLE 36	SAMPLE 37	SAMPLE 38	SAMPLE 39	SAMPLE 40	SAMPLE 41	SAMPLE 42	SAMPLE 43	SAMPLE 44	SAMPLE 45	SAMPLE 46	SAMPLE 47
CO2 [s]	0.0627425	0.0220208	0.0341797	0.0475171	0.0839836	0.0958876	0.060775	0.0361665	0.0955001	0.0838282	0.0929212	0.098308	0.0330857	0.0924343	0.0857039	0.0667176	0.0876267	0.0923318	0.0843923	0.0689734	0.0935959	0.0706331	0.0855322	0.0675229	0.0568214	0.0921743	0.0632243	0.0471431	0.0292994	0.0923346	0.0469241	0.0850346	0.0725247	0.0840524	0.0361517	0.02468	0.0272873	0.0860753	0.0660466	0.0363986	0.0775564	0.0440977	0.052316	0.0796924	0.0464786	0.0850692	0.0727169	0.0628802	0.0295512
CO2 [y]	0.0387535	0.0211012	0.01	0.0229027	0.0593697	0.0712737	0.0361636	0.0115504	0.0708928	0.0592129	0.0683059	0.073694	0.01	0.0678261	0.0610898	0.0421038	0.0630098	0.0677146	0.0597843	0.0443602	0.0689875	0.0460182	0.0609189	0.0429152	0.0322125	0.0675636	0.0386146	0.0225312	0.01	0.0677174	0.0223157	0.0604202	0.0479109	0.0594371	0.0115445	0.01	0.01	0.0614637	0.0414311	0.011787	0.0529431	0.0194888	0.0277016	0.0550806	0.0218642	0.0604608	0.0481049	0.0382692	0.01
RuBP [s]	0.0617372	0.0210091	0.0545559	0.0568385	0.0585377	0.0949786	0.0255164	0.0979321	0.0753284	0.0782335	0.0357792	0.0693783	0.052348	0.0246803	0.0279153	0.0826705	0.0815814	0.0564549	0.0489345	0.0260392	0.063334	0.0402892	0.0652902	0.0918275	0.06449	0.0718336	0.0726605	0.0451952	0.0617226	0.0848887	0.0254221	0.0599229	0.0972112	0.0784178	0.0776004	0.0424921	0.0448134	0.0454295	0.0911658	0.0795853	0.0686047	0.0842567	0.0642163	0.0585087	0.0702571	0.0882924	0.0461668	0.0604711	0.0501169
Rubisco [s]	12.7858	8.82976	23.7561	8.23798	12.358	5.43098	38.4835	15.2232	5.92185	6.07057	13.0509	8.02282	25.6345	22.8146	14.7955	9.67796	7.75014	7.34172	14.1156	13.9963	5.35012	6.01935	7.26116	9.35524	9.80138	8.31129	8.48353	7.67121	9.70946	3.73926	22.3992	5.64548	6.69912	3.65472	13.2243	52.1785	45.87	12.3497	2.60808	9.97523	4.70429	9.77336	17.9529	5.13488	5.33409	6.03791	12.4473	9.68729	24.3869
Rubisco_RuBP_C_complex [s]	26.1862	0.00504309	26.1923	26.1821	26.1829	26.1829	26.1872	26.1791	26.1942	26.1805	26.1805	26.1829	26.1857	26.1927	26.1825	26.1831	26.1777	26.1772	26.193	26.1841	26.1925	26.1812	26.1839	26.1937	26.1916	26.1884	26.1901	26.1865	26.1944	26.1772	26.1924	26.1821	26.1831	26.1805	26.1944	26.1876	26.1881	26.1869	26.1801	26.1869	26.184	26.1916	26.1821	26.1866	26.1821	26.1924	26.1863	26.1881	26.1839
3PGA [s]	545.038	8.30329e-12	545.038	545.038	545.038	545.038	545.038	545.038	545.038	545.038	545.038	545.038	545.038	545.038	545.038	545.038	545.038	545.038	545.038	545.038	545.038	545.038	545.038	545.038	545.038	545.038	545.038	545.038	545.038	545.038	545.038	545.038	545.038	545.038	545.038	545.038	545.038	545.038	545.038	545.038	545.038	545.038	545.038	545.038	545.038	545.038	545.038	545.038	545.038
ATP [s]	0.0753544	0.0292164	0.0852448	0.10245	0.0361231	0.0158779	0.0823129	0.0103745	0.077824	0.0183552	0.0219931	0.0340746	0.070187	0.0506211	0.0905278	0.089736	0.0362465	0.0415055	0.0741337	0.0990195	0.0628962	0.0649052	0.0696684	0.0314637	0.093826	0.0934937	0.0412429	0.0576542	0.0793505	0.0889569	0.0584665	0.0972557	0.051988	0.0533725	0.109564	0.0684739	0.0482574	0.0502095	0.01	0.11943	0.100226	0.0237773	0.102209	0.0357643	0.080343	0.0790458	0.111506	0.111509	0.033209
PGK [s]	0.0112856	0.016808	0.01	0.01	0.01	0.0101904	0.01	0.0164745	0.01	0.0405803	0.01	0.01	0.01	0.01	0.01	0.01	0.01	0.01	0.01	0.01	0.01	0.01	0.01	0.01	0.01	0.01	0.01	0.01	0.01	0.01	0.01	0.01	0.01	0.01	0.01	0.01	0.01	0.01	0.0147844	0.01	0.01	0.01	0.01	0.01	0.01	0.01	0.01	0.01	0.01
PGK_3PGA_complex [s]	9.67203	1.05382	6.36456	10.1887	9.04787	10.1454	9.0889	10.4326	8.86882	9.48518	9.63045	9.4574	10.6156	10.0307	9.78914	8.77276	9.74843	8.95027	8.83508	9.99005	11.1658	7.96338	8.32223	8.98951	10.3807	9.82685	10.256	9.33591	8.84238	10.6542	10.8896	6.97967	8.37066	9.68936	10.8561	9.63531	7.64264	10.4301	9.15157	10.1497	9.2477	9.93349	9.23496	10.7009	9.64229	9.85942	9.41547	10.7368	10.0911
BPGA [s]	0.588641	1.55509e-15	0.588641	0.588641	0.588641	0.588641	0.588641	0.588641	0.588641	0.588641	0.588641	0.588641	0.588641	0.588641	0.588641	0.588641	0.588641	0.588641	0.588641	0.588641	0.588641	0.588641	0.588641	0.588641	0.588641	0.588641	0.588641	0.588641	0.588641	0.588641	0.588641	0.588641	0.588641	0.588641	0.588641	0.588641	0.588641	0.588641	0.588641	0.588641	0.588641	0.588641	0.588641	0.588641	0.588641	0.588641	0.588641	0.588641	0.588641
ADP [s]	3.13011	1.62276	0.778328	1.61135	2.8773	0.728931	1.99411	1.16099	2.95082	0.171822	0.836595	2.55264	1.03026	2.77777	1.42306	2.11644	2.15688	1.50015	1.84337	2.72137	3.02289	0.972619	1.8913	0.159023	2.10056	1.52894	1.971	3.08619	2.68944	1.31487	0.331845	0.738457	1.57943	1.4542	1.91027	2.99081	1.03585	1.66887	0.301642	1.0669	1.56242	0.891795	1.23596	0.87281	1.47158	0.414051	1.33271	1.69632	2.18449
PGK_BPGA_complex [s]	0.0144152	0.00476565	0.01	0.01	0.0101227	0.01	0.01	0.01	0.01	0.01	0.01	0.0100474	0.01	0.01	0.01	0.01	0.01	0.01	0.01	0.01	0.01	0.01	0.0101472	0.01	0.01	0.01	0.01	0.0112582	0.01	0.01	0.01	0.01	0.01	0.01	0.0107037	0.01	0.01	0.01	0.01	0.01	0.01	0.01	0.01	0.01	0.01	0.01	0.01	0.01	0.01
NADPH [s]	12.6497	3.24014	8.12267	9.78808	10.215	10.3528	12.0126	16.5938	14.259	12.1479	9.63279	9.72186	14.8528	16.4185	7.31982	10.8336	10.0263	13.9312	13.6439	13.9468	16.8829	12.9929	16.0296	14.6349	15.1409	14.1035	15.5026	10.4769	8.33286	6.80155	13.2502	16.2823	7.17925	16.8435	9.4358	13.7595	13.8147	7.67888	9.10737	15.4614	14.3613	8.01649	16.1159	8.23585	15.0637	15.5441	7.8836	12.766	11.8852
GAPDH [s]	0.0133576	0.00382386	0.0200556	0.0142507	0.0142846	0.0153333	0.0139254	0.01	0.01	0.0128372	0.0149895	0.017162	0.01	0.01	0.0214159	0.0129159	0.013587	0.01	0.01	0.01	0.01	0.0129507	0.01	0.01	0.01	0.01	0.01	0.0152472	0.0193835	0.0211152	0.0118051	0.01	0.0193246	0.01	0.015813	0.0106649	0.0114755	0.020168	0.0178351	0.01	0.0112044	0.0180948	0.01	0.019194	0.01	0.01	0.0194164	0.0130997	0.0127693
GAPDH_BPGA_complex [s]	0.0845705	0.00387547	0.0797735	0.079741	0.079714	0.0796119	0.0798582	0.0797431	0.0800092	0.0801669	0.0801157	0.0802217	0.0803945	0.0805282	0.0805709	0.0804805	0.0800076	0.0803424	0.0797866	0.0801224	0.0805424	0.0809532	0.0803	0.0810165	0.0805627	0.0810978	0.0806489	0.079732	0.0796391	0.0811922	0.080956	0.0808778	0.0812963	0.0813777	0.0807375	0.0815775	0.0812821	0.0804428	0.081242	0.0816207	0.0815196	0.0813141	0.0816371	0.0817169	0.08088	0.0804338	0.0800539	0.0818371	0.0820944
GAP [s]	58.1375	6.2559e-13	58.1375	58.1375	58.1375	58.1375	58.1375	58.1375	58.1375	58.1375	58.1375	58.1375	58.1375	58.1375	58.1375	58.1375	58.1375	58.1375	58.1375	58.1375	58.1375	58.1375	58.1375	58.1375	58.1375	58.1375	58.1375	58.1375	58.1375	58.1375	58.1375	58.1375	58.1375	58.1375	58.1375	58.1375	58.1375	58.1375	58.1375	58.1375	58.1375	58.1375	58.1375	58.1375	58.1375	58.1375	58.1375	58.1375	58.1375
NADP [s]	0.0796	5.83159e-16	0.0796	0.0796	0.0796	0.0796	0.0796	0.0796	0.0796	0.0796	0.0796	0.0796	0.0796	0.0796	0.0796	0.0796	0.0796	0.0796	0.0796	0.0796	0.0796	0.0796	0.0796	0.0796	0.0796	0.0796	0.0796	0.0796	0.0796	0.0796	0.0796	0.0796	0.0796	0.0796	0.0796	0.0796	0.0796	0.0796	0.0796	0.0796	0.0796	0.0796	0.0796	0.0796	0.0796	0.0796	0.0796	0.0796	0.0796
GAPDH_GAP_complex [s]	0.0489874	0.0261154	0.0926389	0.0658076	0.0659915	0.0709467	0.0641851	0.0356163	0.0291084	0.0588406	0.0688519	0.0787997	0.0398094	0.0337234	0.0981366	0.0588911	0.0624697	0.0125691	0.01	0.0420277	0.01	0.0585792	0.0250931	0.0101601	0.0296015	0.0393287	0.0244533	0.0704282	0.089663	0.0961237	0.0532749	0.0169734	0.0877329	0.0131967	0.072041	0.0473769	0.0514234	0.0924895	0.0808946	0.0440732	0.0499314	0.082024	0.0101	0.0867078	0.0148708	0.0298443	0.0894003	0.0583851	0.0565989
TPI [s]	0.01	1.68352e-16	0.01	0.01	0.01	0.01	0.01	0.01	0.01	0.01	0.01	0.01	0.01	0.01	0.01	0.01	0.01	0.01	0.01	0.01	0.01	0.01	0.01	0.01	0.01	0.01	0.01	0.01	0.01	0.01	0.01	0.01	0.01	0.01	0.01	0.01	0.01	0.01	0.01	0.01	0.01	0.01	0.01	0.01	0.01	0.01	0.01	0.01	0.01
TPI_GAP_complex [s]	0.140958	0.0589324	0.138957	0.193044	0.103439	0.060916	0.140403	0.107471	0.12257	0.171154	0.109825	0.165014	0.100292	0.18625	0.0706176	0.109241	0.192555	0.130834	0.0430949	0.0603772	0.0961321	0.122354	0.232716	0.234266	0.0727016	0.0915052	0.232283	0.0656157	0.208124	0.203412	0.2049	0.139032	0.176998	0.226274	0.127006	0.188461	0.145063	0.0960632	0.110966	0.204345	0.203916	0.142806	0.187415	0.109987	0.175152	0.0824026	0.16998	0.115701	0.137684
DHAP [s]	400.463	8.70139e-12	400.463	400.463	400.463	400.463	400.463	400.463	400.463	400.463	400.463	400.463	400.463	400.463	400.463	400.463	400.463	400.463	400.463	400.463	400.463	400.463	400.463	400.463	400.463	400.463	400.463	400.463	400.463	400.463	400.463	400.463	400.463	400.463	400.463	400.463	400.463	400.463	400.463	400.463	400.463	400.463	400.463	400.463	400.463	400.463	400.463	400.463	400.463
TPI_DHAP_complex [s]	0.0457119	0.0198541	0.0425346	0.0347988	0.0708075	0.0263804	0.0390303	0.01	0.0622026	0.0463362	0.025277	0.0138876	0.0176807	0.0503029	0.0633525	0.0861583	0.0477149	0.0397324	0.0876467	0.0596991	0.0429225	0.0655597	0.0624307	0.0690625	0.0469581	0.0195736	0.052645	0.023564	0.0141606	0.0362665	0.0409495	0.0340112	0.0535934	0.0478964	0.0549968	0.0394742	0.0280849	0.0484944	0.0520543	0.0747438	0.0381093	0.0232704	0.0684965	0.0520636	0.0520427	0.0525723	0.0629312	0.0531606	0.0522665
FBA [s]	0.01	1.68352e-16	0.01	0.01	0.01	0.01	0.01	0.01	0.01	0.01	0.01	0.01	0.01	0.01	0.01	0.01	0.01	0.01	0.01	0.01	0.01	0.01	0.01	0.01	0.01	0.01	0.01	0.01	0.01	0.01	0.01	0.01	0.01	0.01	0.01	0.01	0.01	0.01	0.01	0.01	0.01	0.01	0.01	0.01	0.01	0.01	0.01	0.01	0.01
FBA_GAP_DHAP_complex [s]	0.0499501	0.0163595	0.0499132	0.0503781	0.0599523	0.0482428	0.0709593	0.0436912	0.0600979	0.029499	0.0343772	0.0589739	0.0332855	0.0470339	0.0488467	0.0449793	0.047943	0.0852095	0.0647162	0.0333369	0.058848	0.028655	0.0558041	0.0628213	0.0576246	0.0260816	0.0672806	0.0699387	0.0553194	0.0442452	0.0593094	0.0536198	0.0252059	0.0547683	0.0736964	0.0503749	0.0654	0.0491084	0.0343324	0.0591761	0.0320039	0.039478	0.0506289	0.0349634	0.0295159	0.0539137	0.0395843	0.0527468	0.0418382
FBP [s]	90.0235	1.13744e-13	90.0235	90.0235	90.0235	90.0235	90.0235	90.0235	90.0235	90.0235	90.0235	90.0235	90.0235	90.0235	90.0235	90.0235	90.0235	90.0235	90.0235	90.0235	90.0235	90.0235	90.0235	90.0235	90.0235	90.0235	90.0235	90.0235	90.0235	90.0235	90.0235	90.0235	90.0235	90.0235	90.0235	90.0235	90.0235	90.0235	90.0235	90.0235	90.0235	90.0235	90.0235	90.0235	90.0235	90.0235	90.0235	90.0235	90.0235
FBA_FBP_complex [s]	3.52926	2.73509	1.07186	0.658046	5.72198	6.05945	7.97982	1.25106	5.25151	2.34687	0.155183	5.60682	2.32175	2.06821	1.59066	2.6606	4.84632	10.2794	1.08234	2.39078	7.95492	0.151573	5.0296	1.70459	1.10162	1.2651	8.35091	0.592244	4.33766	1.37894	8.95605	2.77904	0.453287	6.46063	3.55278	3.89987	5.02822	1.89869	2.57242	2.10206	1.94608	3.31369	5.34021	3.318	2.81494	6.72335	3.70522	7.57694	2.70199
FBPase [s]	0.01	1.68352e-16	0.01	0.01	0.01	0.01	0.01	0.01	0.01	0.01	0.01	0.01	0.01	0.01	0.01	0.01	0.01	0.01	0.01	0.01	0.01	0.01	0.01	0.01	0.01	0.01	0.01	0.01	0.01	0.01	0.01	0.01	0.01	0.01	0.01	0.01	0.01	0.01	0.01	0.01	0.01	0.01	0.01	0.01	0.01	0.01	0.01	0.01	0.01
FBPase_FBP_complex [s]	0.100662	1.15006	0.0429997	0.0891171	0.0365925	0.0267078	0.0194894	0.0276545	0.0262257	0.0175622	0.0114921	0.0228099	0.0600879	0.042182	0.0371242	0.0278184	0.0526704	0.0193636	0.0435206	0.0179164	0.0312161	0.0276774	0.0727947	0.0174404	0.0380876	0.0179217	0.0708011	0.0250497	0.0273415	0.01	0.0573129	0.0521086	0.0513109	0.0623412	0.091283	0.0560037	0.0329679	0.063546	0.0306837	0.049598	0.0344593	0.0851904	0.0549736	0.0105363	0.0484511	0.0566198	0.07926	0.0525062	0.0106662
F6P [s]	462.129	2.78672e-12	462.129	462.129	462.129	462.129	462.129	462.129	462.129	462.129	462.129	462.129	462.129	462.129	462.129	462.129	462.129	462.129	462.129	462.129	462.129	462.129	462.129	462.129	462.129	462.129	462.129	462.129	462.129	462.129	462.129	462.129	462.129	462.129	462.129	462.129	462.129	462.129	462.129	462.129	462.129	462.129	462.129	462.129	462.129	462.129	462.129	462.129	462.129
TRK [s]	0.01	1.68352e-16	0.01	0.01	0.01	0.01	0.01	0.01	0.01	0.01	0.01	0.01	0.01	0.01	0.01	0.01	0.01	0.01	0.01	0.01	0.01	0.01	0.01	0.01	0.01	0.01	0.01	0.01	0.01	0.01	0.01	0.01	0.01	0.01	0.01	0.01	0.01	0.01	0.01	0.01	0.01	0.01	0.01	0.01	0.01	0.01	0.01	0.01	0.01
TRK_F6P_GAP_complex [s]	0.0468019	0.017408	0.0341481	0.0518873	0.0529142	0.0442891	0.033548	0.078521	0.0305433	0.0618105	0.0276349	0.0448858	0.0529988	0.0534935	0.0165787	0.0141558	0.0465132	0.0674358	0.0396053	0.0344047	0.0290815	0.0602582	0.0316414	0.073886	0.0795099	0.0737623	0.0232397	0.0565695	0.0778244	0.0624705	0.0649063	0.0267469	0.0174005	0.0561423	0.0505423	0.0411884	0.0344336	0.0494461	0.040581	0.0588816	0.0627319	0.0517796	0.0312533	0.0452583	0.0758113	0.0224762	0.0595976	0.0585766	0.0384767
E4P [s]	47.7424	8.81514e-13	47.7424	47.7424	47.7424	47.7424	47.7424	47.7424	47.7424	47.7424	47.7424	47.7424	47.7424	47.7424	47.7424	47.7424	47.7424	47.7424	47.7424	47.7424	47.7424	47.7424	47.7424	47.7424	47.7424	47.7424	47.7424	47.7424	47.7424	47.7424	47.7424	47.7424	47.7424	47.7424	47.7424	47.7424	47.7424	47.7424	47.7424	47.7424	47.7424	47.7424	47.7424	47.7424	47.7424	47.7424	47.7424	47.7424	47.7424
Xu5P [s]	0.200784	0.729759	0.109542	0.119839	0.0734945	0.0857518	0.0996581	0.140734	0.151705	0.109435	0.0771163	0.0848178	0.124518	0.0819016	0.134009	0.152431	0.129379	0.161282	0.103305	0.120002	0.186189	0.17139	0.128336	0.152807	0.0978854	0.0479769	0.141692	0.039381	0.109878	0.111454	0.11817	0.198144	0.157348	0.120337	0.154676	0.132292	0.120406	0.149832	0.102618	0.124002	0.151967	0.138907	0.173433	0.0860689	0.154278	0.122093	0.0929377	0.122439	0.0949689
TRK_E4P_Xu5P_complex [s]	0.0450342	0.020487	0.0314167	0.0386206	0.0108867	0.01	0.0202813	0.0652543	0.0551507	0.0476411	0.0246155	0.0316192	0.0397321	0.0210465	0.0606672	0.071885	0.0531769	0.0541692	0.0263387	0.0361536	0.0730761	0.0469915	0.0428957	0.0659112	0.0437739	0.016809	0.057674	0.01	0.0498356	0.0492038	0.0516397	0.0904775	0.0709878	0.0428756	0.0372756	0.0352377	0.036318	0.0586352	0.0273144	0.0423526	0.0675135	0.0385129	0.064971	0.0319916	0.0625446	0.0490806	0.0259812	0.0453099	0.0281473
SBA [s]	0.01	1.68352e-16	0.01	0.01	0.01	0.01	0.01	0.01	0.01	0.01	0.01	0.01	0.01	0.01	0.01	0.01	0.01	0.01	0.01	0.01	0.01	0.01	0.01	0.01	0.01	0.01	0.01	0.01	0.01	0.01	0.01	0.01	0.01	0.01	0.01	0.01	0.01	0.01	0.01	0.01	0.01	0.01	0.01	0.01	0.01	0.01	0.01	0.01	0.01
SBA_DHAP_E4P_complex [s]	0.0477346	0.0165748	0.0491261	0.0223938	0.0260072	0.039402	0.0222363	0.0404118	0.022336	0.0273605	0.0358079	0.0567391	0.0199372	0.0597724	0.0719657	0.0284989	0.0426538	0.0569061	0.049513	0.0422689	0.0485238	0.0172089	0.0399197	0.0520289	0.0397384	0.0338908	0.0390299	0.0319918	0.0384915	0.0404506	0.0229383	0.0390468	0.0220551	0.0368747	0.0243221	0.0381971	0.0357537	0.054004	0.0388703	0.0271837	0.0401894	0.0374827	0.0234288	0.0300507	0.0480888	0.053929	0.0623862	0.0668488	0.0750277
SBP [s]	186.178	3.41231e-12	186.178	186.178	186.178	186.178	186.178	186.178	186.178	186.178	186.178	186.178	186.178	186.178	186.178	186.178	186.178	186.178	186.178	186.178	186.178	186.178	186.178	186.178	186.178	186.178	186.178	186.178	186.178	186.178	186.178	186.178	186.178	186.178	186.178	186.178	186.178	186.178	186.178	186.178	186.178	186.178	186.178	186.178	186.178	186.178	186.178	186.178	186.178
SBA_SBP_complex [s]	9.09732	7.0101	1.45818	3.62189	4.77442	8.12693	3.55936	8.54885	3.59894	5.59278	6.94304	3.2468	1.4992	2.00402	2.91951	6.04453	11.6616	3.31349	14.3835	11.2738	1.25017	1.5644	10.5766	2.77579	10.5047	0.425176	8.47096	7.43063	10.0099	2.89556	2.73765	10.2302	3.48749	0.120038	3.46513	0.551379	8.92341	16.1656	10.1602	4.44514	7.39246	9.60956	4.03259	0.936749	13.8183	16.1359	19.4919	1.85081	1.56856
SBPase [s]	0.01	1.68352e-16	0.01	0.01	0.01	0.01	0.01	0.01	0.01	0.01	0.01	0.01	0.01	0.01	0.01	0.01	0.01	0.01	0.01	0.01	0.01	0.01	0.01	0.01	0.01	0.01	0.01	0.01	0.01	0.01	0.01	0.01	0.01	0.01	0.01	0.01	0.01	0.01	0.01	0.01	0.01	0.01	0.01	0.01	0.01	0.01	0.01	0.01	0.01
SBPase_SBP_complex [s]	1.63786	1.06635e-14	1.63786	1.63786	1.63786	1.63786	1.63786	1.63786	1.63786	1.63786	1.63786	1.63786	1.63786	1.63786	1.63786	1.63786	1.63786	1.63786	1.63786	1.63786	1.63786	1.63786	1.63786	1.63786	1.63786	1.63786	1.63786	1.63786	1.63786	1.63786	1.63786	1.63786	1.63786	1.63786	1.63786	1.63786	1.63786	1.63786	1.63786	1.63786	1.63786	1.63786	1.63786	1.63786	1.63786	1.63786	1.63786	1.63786	1.63786
S7P [s]	1413.56	1.11469e-11	1413.56	1413.56	1413.56	1413.56	1413.56	1413.56	1413.56	1413.56	1413.56	1413.56	1413.56	1413.56	1413.56	1413.56	1413.56	1413.56	1413.56	1413.56	1413.56	1413.56	1413.56	1413.56	1413.56	1413.56	1413.56	1413.56	1413.56	1413.56	1413.56	1413.56	1413.56	1413.56	1413.56	1413.56	1413.56	1413.56	1413.56	1413.56	1413.56	1413.56	1413.56	1413.56	1413.56	1413.56	1413.56	1413.56	1413.56
TRK_S7P_GAP_complex [s]	0.0475011	0.0175753	0.0133952	0.0709436	0.0552193	0.0799813	0.0572357	0.0291676	0.0764357	0.0432486	0.0554647	0.0231209	0.0520407	0.0404726	0.0719048	0.0481512	0.0633632	0.0646866	0.0519638	0.0637622	0.0478737	0.0207924	0.0792508	0.0445172	0.0326106	0.0281609	0.0760928	0.0438799	0.018595	0.0418462	0.0585189	0.0182703	0.0667718	0.0426139	0.0645649	0.035703	0.057199	0.0501613	0.0697997	0.0629059	0.0284695	0.0554325	0.0506717	0.0498273	0.0838275	0.027383	0.0567911	0.0754073	0.0631974
R5P [s]	99.2016	1.15166e-12	99.2016	99.2016	99.2016	99.2016	99.2016	99.2016	99.2016	99.2016	99.2016	99.2016	99.2016	99.2016	99.2016	99.2016	99.2016	99.2016	99.2016	99.2016	99.2016	99.2016	99.2016	99.2016	99.2016	99.2016	99.2016	99.2016	99.2016	99.2016	99.2016	99.2016	99.2016	99.2016	99.2016	99.2016	99.2016	99.2016	99.2016	99.2016	99.2016	99.2016	99.2016	99.2016	99.2016	99.2016	99.2016	99.2016	99.2016
TRK_R5P_Xu5P_complex [s]	0.0635103	0.401648	0.0423098	0.057677	0.0419526	0.0667147	0.0548934	0.0635983	0.0631691	0.0657562	0.042198	0.0570558	0.0399568	0.0150742	0.0586381	0.0738386	0.0500965	0.05142	0.0450567	0.0585429	0.0160878	0.0499592	0.0659841	0.0532449	0.0193439	0.0252298	0.0628262	0.026559	0.0212665	0.0585667	0.0356823	0.0446609	0.066686	0.0115312	0.0217828	0.0435272	0.0256813	0.0300618	0.056533	0.0268582	0.0152028	0.0128266	0.0251274	0.0117704	0.0705608	0.0478657	0.0435244	0.0885222	0.0499308
RPE [s]	0.661893	0.372481	0.836939	0.534002	0.974351	1.0511	0.420771	0.626171	0.461971	0.827463	0.625404	0.8768	0.234659	1.00741	0.682986	0.641027	0.333114	0.553093	0.96775	0.524601	0.436142	0.424925	0.38388	0.605119	0.446856	1.70852	0.459019	1.17304	0.724849	0.594764	0.773815	0.352155	0.528018	0.679432	0.482038	0.489204	0.821379	0.561829	0.711242	0.51951	0.495794	0.642421	0.4789	0.663817	0.319635	0.814462	0.631407	0.75493	0.688261
RPE_Xu5P_complex [s]	0.0508993	0.0140486	0.0666987	0.0620151	0.0629251	0.0556775	0.0311585	0.0543145	0.0610359	0.0557239	0.0387005	0.0497996	0.028665	0.0435309	0.0469531	0.0515821	0.0406311	0.0447455	0.0629462	0.0539583	0.0512027	0.0561132	0.039758	0.0626704	0.0329911	0.0550982	0.0444872	0.0387262	0.0489653	0.047147	0.0526668	0.0575423	0.0802304	0.0535527	0.0384419	0.0333424	0.0847806	0.07927	0.0532642	0.0610851	0.0401014	0.0725648	0.0496007	0.0438789	0.0407003	0.0578292	0.0333722	0.0574806	0.0623198
Ru5P [s]	78.6824	4.07318	80.7034	80.7034	80.7034	80.7034	80.7034	80.7034	80.7034	80.7034	80.7034	80.7034	80.7034	80.7034	80.7034	80.7034	80.7034	80.7034	80.7034	80.7034	80.7034	80.7034	80.7034	80.7034	80.7034	80.5727	80.7034	80.7034	76.1661	80.7034	80.7034	80.7034	80.7034	80.7034	80.3659	80.7034	80.7034	80.7034	80.7034	80.7034	80.7034	80.7034	80.7034	80.7034	80.7034	80.7034	80.7034	80.7034	80.7034
RPE_Ru5P_complex [s]	0.0450112	0.0210382	0.0401654	0.0354818	0.0363918	0.0291442	0.0153306	0.01	0.0345026	0.0291905	0.0138944	0.0700009	0.0970722	0.0689771	0.0381967	0.0250488	0.0666446	0.074551	0.0593274	0.0274249	0.0795328	0.0295798	0.0343785	0.0361371	0.0585268	0.0904656	0.0179539	0.0765233	0.046623	0.0702065	0.0624276	0.0574621	0.053697	0.0850968	0.0170569	0.0429273	0.0582473	0.0527367	0.0704537	0.0562591	0.0830669	0.0460314	0.0482572	0.0543314	0.014167	0.0312959	0.01	0.0660776	0.039214
RPI [s]	0.01	1.68352e-16	0.01	0.01	0.01	0.01	0.01	0.01	0.01	0.01	0.01	0.01	0.01	0.01	0.01	0.01	0.01	0.01	0.01	0.01	0.01	0.01	0.01	0.01	0.01	0.01	0.01	0.01	0.01	0.01	0.01	0.01	0.01	0.01	0.01	0.01	0.01	0.01	0.01	0.01	0.01	0.01	0.01	0.01	0.01	0.01	0.01	0.01	0.01
RPI_R5P_complex [s]	0.112303	0.0511199	0.167612	0.0714467	0.0819264	0.133773	0.0805235	0.117448	0.0495232	0.0441146	0.197	0.0785631	0.138668	0.127461	0.0675959	0.155925	0.169684	0.161618	0.0902157	0.0809764	0.123327	0.0995051	0.0942815	0.0467979	0.0487422	0.0976093	0.237772	0.0719471	0.139398	0.064727	0.167438	0.129866	0.113771	0.0609073	0.100042	0.0882487	0.0731061	0.107602	0.0540057	0.131271	0.0546797	0.170633	0.1434	0.0568118	0.178374	0.0918455	0.163831	0.0400949	0.25385
RPI_Ru5P_complex [s]	0.0457122	0.0196279	0.0443918	0.0700726	0.0317019	0.0419031	0.0850043	0.0303141	0.0255886	0.0143572	0.0545014	0.0533452	0.034435	0.0604339	0.01	0.0403715	0.0451047	0.0423299	0.0177675	0.0340943	0.0682213	0.0483302	0.0440181	0.0791155	0.0490891	0.0756685	0.0685267	0.0114831	0.0415965	0.0138764	0.0443319	0.0571784	0.0674715	0.0753136	0.0477183	0.0759852	0.0786838	0.0237485	0.0671221	0.0318905	0.0598011	0.0520167	0.036063	0.053102	0.0480939	0.0183282	0.043091	0.0320768	0.0740577
PRK [s]	0.0158488	0.0115756	0.014023	0.0106806	0.0174361	0.0488881	0.0104135	0.0892735	0.0104859	0.0460435	0.037783	0.0302691	0.016262	0.0223451	0.0124679	0.0132786	0.0207447	0.0271586	0.015919	0.0113705	0.0167563	0.0160301	0.0154515	0.0225508	0.0125788	0.01	0.0185509	0.0168758	0.01	0.0112965	0.0118856	0.0120336	0.0229458	0.0168692	0.01	0.0106573	0.0213682	0.015268	0.118185	0.0100905	0.0114051	0.0409312	0.0117119	0.0252785	0.0140437	0.0145437	0.0109509	0.0107036	0.0237731
PRK_Ru5P_complex [s]	0.0452435	0.00680386	0.0566719	0.0485072	0.0398	0.0398	0.0398	0.0398	0.0398	0.0398	0.0398	0.0434382	0.0523134	0.051486	0.0512892	0.0563635	0.0398	0.0511712	0.0554408	0.0510643	0.045254	0.0441668	0.0470756	0.0398	0.055448	0.0398	0.0398	0.0398	0.0398	0.0412987	0.0398	0.0546498	0.0564714	0.0398	0.0482523	0.0398	0.043419	0.0398	0.0555794	0.0574567	0.0524511	0.0398	0.0568064	0.0398	0.0512589	0.0529782	0.0587462	0.056524	0.0398
PGI [s]	0.01	1.68352e-16	0.01	0.01	0.01	0.01	0.01	0.01	0.01	0.01	0.01	0.01	0.01	0.01	0.01	0.01	0.01	0.01	0.01	0.01	0.01	0.01	0.01	0.01	0.01	0.01	0.01	0.01	0.01	0.01	0.01	0.01	0.01	0.01	0.01	0.01	0.01	0.01	0.01	0.01	0.01	0.01	0.01	0.01	0.01	0.01	0.01	0.01	0.01
PGI_F6P_complex [s]	0.0463325	0.0195821	0.0930097	0.0455581	0.0595415	0.0493005	0.031465	0.0198842	0.0269493	0.0378769	0.0281318	0.0635057	0.0203993	0.0538029	0.0358476	0.037884	0.044074	0.0746114	0.0376773	0.0753947	0.0148315	0.0320901	0.0185967	0.0702825	0.0241659	0.0695696	0.0440052	0.0449923	0.0223774	0.0540976	0.0485078	0.073228	0.0425937	0.0491142	0.0513851	0.0630092	0.0846138	0.021077	0.0583859	0.0659139	0.0315186	0.0592361	0.0465921	0.053043	0.0330563	0.0379061	0.0622338	0.066944	0.0791309
G6P [s]	753.077	3.86729e-12	753.077	753.077	753.077	753.077	753.077	753.077	753.077	753.077	753.077	753.077	753.077	753.077	753.077	753.077	753.077	753.077	753.077	753.077	753.077	753.077	753.077	753.077	753.077	753.077	753.077	753.077	753.077	753.077	753.077	753.077	753.077	753.077	753.077	753.077	753.077	753.077	753.077	753.077	753.077	753.077	753.077	753.077	753.077	753.077	753.077	753.077	753.077
PGI_G6P_complex [s]	0.0463506	0.0201073	0.0632767	0.0488115	0.0609761	0.020309	0.0241833	0.01	0.0396949	0.0357653	0.0344165	0.0676435	0.0610072	0.0667231	0.0461477	0.0849356	0.0406565	0.0689707	0.0282992	0.0707449	0.0283706	0.0450863	0.0387788	0.0370867	0.0284612	0.0381364	0.0306543	0.0119289	0.0748384	0.0902531	0.0602316	0.0507996	0.0335782	0.0435243	0.0631956	0.0571815	0.0649125	0.0577037	0.010916	0.0692294	0.0592874	0.0375574	0.04941	0.0527006	0.0783799	0.0388632	0.0513735	0.0579841	0.0623435
PGM [s]	0.01	1.68352e-16	0.01	0.01	0.01	0.01	0.01	0.01	0.01	0.01	0.01	0.01	0.01	0.01	0.01	0.01	0.01	0.01	0.01	0.01	0.01	0.01	0.01	0.01	0.01	0.01	0.01	0.01	0.01	0.01	0.01	0.01	0.01	0.01	0.01	0.01	0.01	0.01	0.01	0.01	0.01	0.01	0.01	0.01	0.01	0.01	0.01	0.01	0.01
PGM_G6P_complex [s]	0.0463606	0.019428	0.0474748	0.0292475	0.0496609	0.0135363	0.0294507	0.0377878	0.0302738	0.0212943	0.0257633	0.0765987	0.01	0.0722192	0.0201936	0.0272732	0.0113733	0.0606482	0.0632645	0.0492795	0.0316924	0.0603928	0.0554858	0.0819233	0.025986	0.0184272	0.0993897	0.0327899	0.0450458	0.0757388	0.0318951	0.0281318	0.0229457	0.0715322	0.01	0.0357816	0.0255138	0.0506766	0.0648196	0.01	0.0581183	0.0291361	0.0396454	0.0618605	0.0351606	0.0560434	0.0424044	0.0287633	0.0219481
G1P [s]	71.9771	1.47867e-12	71.9771	71.9771	71.9771	71.9771	71.9771	71.9771	71.9771	71.9771	71.9771	71.9771	71.9771	71.9771	71.9771	71.9771	71.9771	71.9771	71.9771	71.9771	71.9771	71.9771	71.9771	71.9771	71.9771	71.9771	71.9771	71.9771	71.9771	71.9771	71.9771	71.9771	71.9771	71.9771	71.9771	71.9771	71.9771	71.9771	71.9771	71.9771	71.9771	71.9771	71.9771	71.9771	71.9771	71.9771	71.9771	71.9771	71.9771
PGM_G1P_complex [s]	0.0464062	0.0208037	0.076962	0.0275361	0.0405651	0.0387021	0.0747959	0.0298187	0.0173149	0.0564389	0.0584847	0.0109891	0.010149	0.0290644	0.0266926	0.0135531	0.030647	0.0444856	0.0924556	0.0574598	0.0704699	0.0459821	0.0453893	0.0777495	0.0607956	0.049024	0.0801339	0.0128199	0.0505341	0.0338396	0.0436189	0.0345504	0.0579438	0.050194	0.0231407	0.0308892	0.075073	0.0591255	0.0725463	0.0588762	0.0522398	0.0732296	0.0430021	0.067987	0.0370677	0.0187677	0.0415445	0.0481695	0.0609301
AGPase [s]	0.0100045	0.000115627	0.01	0.01	0.01	0.01	0.01	0.01	0.01	0.01	0.01	0.01	0.01	0.01	0.01	0.01	0.01	0.01	0.01	0.01	0.01	0.01	0.01	0.01	0.01	0.01	0.01	0.01	0.01	0.01	0.01	0.01	0.01	0.01	0.01	0.01	0.01	0.01	0.01	0.01	0.01	0.01	0.01	0.01	0.01	0.01	0.01	0.01	0.01
AGPase_ATP_G1P_complex [s]	0.0398049	0.0165139	0.04924	0.0371367	0.0242797	0.01	0.0440233	0.01	0.043049	0.0119578	0.0104303	0.0172881	0.0308015	0.0215998	0.0391119	0.0456401	0.0164105	0.0153709	0.0382253	0.0557293	0.0230984	0.0354441	0.0368027	0.0169822	0.0459297	0.0536957	0.0165938	0.0212737	0.0312926	0.0471008	0.0307013	0.0635625	0.0230787	0.0218775	0.048885	0.0326997	0.0338167	0.0344958	0.01	0.0442839	0.0469244	0.0107233	0.0545565	0.0200304	0.0498574	0.0483472	0.0551668	0.0500283	0.0237639
ADPG [s]	47.6564	3.41231e-13	47.6564	47.6564	47.6564	47.6564	47.6564	47.6564	47.6564	47.6564	47.6564	47.6564	47.6564	47.6564	47.6564	47.6564	47.6564	47.6564	47.6564	47.6564	47.6564	47.6564	47.6564	47.6564	47.6564	47.6564	47.6564	47.6564	47.6564	47.6564	47.6564	47.6564	47.6564	47.6564	47.6564	47.6564	47.6564	47.6564	47.6564	47.6564	47.6564	47.6564	47.6564	47.6564	47.6564	47.6564	47.6564	47.6564	47.6564
AGPase_ADP_ADPG_complex [s]	0.0434722	0.0205303	0.0739614	0.039857	0.0145008	0.0281956	0.01	0.0242494	0.01	0.0817254	0.0428796	0.0157334	0.0620855	0.0257338	0.0249295	0.01	0.0689948	0.049405	0.0288472	0.0336651	0.0279003	0.0534479	0.0555074	0.0187525	0.0292131	0.0550042	0.0164433	0.0756372	0.0198596	0.076422	0.042425	0.0411341	0.0140632	0.022047	0.0417866	0.0301864	0.0230472	0.0792201	0.0562044	0.0475995	0.041046	0.0386955	0.0516386	0.0261569	0.01	0.0510658	0.0543069	0.0442107	0.0806085
RuBP [y]	0.0377471	0.0200768	0.0299474	0.0322241	0.0339237	0.0703647	0.01	0.073316	0.0507211	0.0536182	0.0111639	0.0447643	0.0277357	0.01	0.01	0.0580567	0.0569645	0.0318377	0.0243265	0.01	0.0387257	0.0156743	0.0406769	0.0672199	0.0398811	0.0472229	0.0480508	0.0205834	0.0371153	0.0602714	0.01	0.0353085	0.0725974	0.0538025	0.0529931	0.0178809	0.0202025	0.0208179	0.0665502	0.0549737	0.0439914	0.0596478	0.0396019	0.0338969	0.0456427	0.0636841	0.0215548	0.0358602	0.0255035
Rubisco [y]	92.1323	107.487	239.613	48.8656	48.893	15.9852	267.403	103.224	19.1894	20.3275	92.2382	26.8851	259.409	124.301	93.9185	35.3941	25.0266	28.7816	64.9257	91.8407	19.2294	38.4953	26.5211	32.5697	45.2899	27.9466	34.0289	57.11	76.6253	11.6433	193.959	21.8568	22.0087	12.2112	98.2195	495.865	449.872	61.1568	9.23287	72.2624	17.4178	50.6041	89.1149	20.78	28.2915	19.0791	65.3052	43.4909	229.521
Rubisco_RuBP_C_complex [y]	1896.87	0.225432	1896.6	1897.06	1897.02	1897.02	1896.83	1897.19	1896.51	1897.13	1897.13	1897.02	1896.89	1896.58	1897.04	1897.01	1897.25	1897.27	1896.57	1896.97	1896.59	1897.09	1896.97	1896.54	1896.63	1896.77	1896.7	1896.86	1896.51	1897.27	1896.59	1897.06	1897.01	1897.13	1896.51	1896.81	1896.79	1896.84	1897.14	1896.84	1896.97	1896.63	1897.06	1896.86	1897.06	1896.59	1896.87	1896.79	1896.97
3PGA [y]	545.038	8.30329e-12	545.038	545.038	545.038	545.038	545.038	545.038	545.038	545.038	545.038	545.038	545.038	545.038	545.038	545.038	545.038	545.038	545.038	545.038	545.038	545.038	545.038	545.038	545.038	545.038	545.038	545.038	545.038	545.038	545.038	545.038	545.038	545.038	545.038	545.038	545.038	545.038	545.038	545.038	545.038	545.038	545.038	545.038	545.038	545.038	545.038	545.038	545.038
ATP [y]	0	0	0	0	0	0	0	0	0	0	0	0	0	0	0	0	0	0	0	0	0	0	0	0	0	0	0	0	0	0	0	0	0	0	0	0	0	0	0	0	0	0	0	0	0	0	0	0	0
PGK [y]	0	0	0	0	0	0	0	0	0	0	0	0	0	0	0	0	0	0	0	0	0	0	0	0	0	0	0	0	0	0	0	0	0	0	0	0	0	0	0	0	0	0	0	0	0	0	0	0	0
PGK_3PGA_complex [y]	0	0	0	0	0	0	0	0	0	0	0	0	0	0	0	0	0	0	0	0	0	0	0	0	0	0	0	0	0	0	0	0	0	0	0	0	0	0	0	0	0	0	0	0	0	0	0	0	0
BPGA [y]	0	0	0	0	0	0	0	0	0	0	0	0	0	0	0	0	0	0	0	0	0	0	0	0	0	0	0	0	0	0	0	0	0	0	0	0	0	0	0	0	0	0	0	0	0	0	0	0	0
ADP [y]	0	0	0	0	0	0	0	0	0	0	0	0	0	0	0	0	0	0	0	0	0	0	0	0	0	0	0	0	0	0	0	0	0	0	0	0	0	0	0	0	0	0	0	0	0	0	0	0	0
PGK_BPGA_complex [y]	0	0	0	0	0	0	0	0	0	0	0	0	0	0	0	0	0	0	0	0	0	0	0	0	0	0	0	0	0	0	0	0	0	0	0	0	0	0	0	0	0	0	0	0	0	0	0	0	0
NADPH [y]	0	0	0	0	0	0	0	0	0	0	0	0	0	0	0	0	0	0	0	0	0	0	0	0	0	0	0	0	0	0	0	0	0	0	0	0	0	0	0	0	0	0	0	0	0	0	0	0	0
GAPDH [y]	0	0	0	0	0	0	0	0	0	0	0	0	0	0	0	0	0	0	0	0	0	0	0	0	0	0	0	0	0	0	0	0	0	0	0	0	0	0	0	0	0	0	0	0	0	0	0	0	0
GAPDH_BPGA_complex [y]	0	0	0	0	0	0	0	0	0	0	0	0	0	0	0	0	0	0	0	0	0	0	0	0	0	0	0	0	0	0	0	0	0	0	0	0	0	0	0	0	0	0	0	0	0	0	0	0	0
GAP [y]	0	0	0	0	0	0	0	0	0	0	0	0	0	0	0	0	0	0	0	0	0	0	0	0	0	0	0	0	0	0	0	0	0	0	0	0	0	0	0	0	0	0	0	0	0	0	0	0	0
NADP [y]	0	0	0	0	0	0	0	0	0	0	0	0	0	0	0	0	0	0	0	0	0	0	0	0	0	0	0	0	0	0	0	0	0	0	0	0	0	0	0	0	0	0	0	0	0	0	0	0	0
GAPDH_GAP_complex [y]	0	0	0	0	0	0	0	0	0	0	0	0	0	0	0	0	0	0	0	0	0	0	0	0	0	0	0	0	0	0	0	0	0	0	0	0	0	0	0	0	0	0	0	0	0	0	0	0	0
TPI [y]	0	0	0	0	0	0	0	0	0	0	0	0	0	0	0	0	0	0	0	0	0	0	0	0	0	0	0	0	0	0	0	0	0	0	0	0	0	0	0	0	0	0	0	0	0	0	0	0	0
TPI_GAP_complex [y]	0	0	0	0	0	0	0	0	0	0	0	0	0	0	0	0	0	0	0	0	0	0	0	0	0	0	0	0	0	0	0	0	0	0	0	0	0	0	0	0	0	0	0	0	0	0	0	0	0
DHAP [y]	0	0	0	0	0	0	0	0	0	0	0	0	0	0	0	0	0	0	0	0	0	0	0	0	0	0	0	0	0	0	0	0	0	0	0	0	0	0	0	0	0	0	0	0	0	0	0	0	0
TPI_DHAP_complex [y]	0	0	0	0	0	0	0	0	0	0	0	0	0	0	0	0	0	0	0	0	0	0	0	0	0	0	0	0	0	0	0	0	0	0	0	0	0	0	0	0	0	0	0	0	0	0	0	0	0
FBA [y]	0	0	0	0	0	0	0	0	0	0	0	0	0	0	0	0	0	0	0	0	0	0	0	0	0	0	0	0	0	0	0	0	0	0	0	0	0	0	0	0	0	0	0	0	0	0	0	0	0
FBA_GAP_DHAP_complex [y]	0	0	0	0	0	0	0	0	0	0	0	0	0	0	0	0	0	0	0	0	0	0	0	0	0	0	0	0	0	0	0	0	0	0	0	0	0	0	0	0	0	0	0	0	0	0	0	0	0
FBP [y]	0	0	0	0	0	0	0	0	0	0	0	0	0	0	0	0	0	0	0	0	0	0	0	0	0	0	0	0	0	0	0	0	0	0	0	0	0	0	0	0	0	0	0	0	0	0	0	0	0
FBA_FBP_complex [y]	0	0	0	0	0	0	0	0	0	0	0	0	0	0	0	0	0	0	0	0	0	0	0	0	0	0	0	0	0	0	0	0	0	0	0	0	0	0	0	0	0	0	0	0	0	0	0	0	0
FBPase [y]	0	0	0	0	0	0	0	0	0	0	0	0	0	0	0	0	0	0	0	0	0	0	0	0	0	0	0	0	0	0	0	0	0	0	0	0	0	0	0	0	0	0	0	0	0	0	0	0	0
FBPase_FBP_complex [y]	0	0	0	0	0	0	0	0	0	0	0	0	0	0	0	0	0	0	0	0	0	0	0	0	0	0	0	0	0	0	0	0	0	0	0	0	0	0	0	0	0	0	0	0	0	0	0	0	0
F6P [y]	0	0	0	0	0	0	0	0	0	0	0	0	0	0	0	0	0	0	0	0	0	0	0	0	0	0	0	0	0	0	0	0	0	0	0	0	0	0	0	0	0	0	0	0	0	0	0	0	0
TRK [y]	0	0	0	0	0	0	0	0	0	0	0	0	0	0	0	0	0	0	0	0	0	0	0	0	0	0	0	0	0	0	0	0	0	0	0	0	0	0	0	0	0	0	0	0	0	0	0	0	0
TRK_F6P_GAP_complex [y]	0	0	0	0	0	0	0	0	0	0	0	0	0	0	0	0	0	0	0	0	0	0	0	0	0	0	0	0	0	0	0	0	0	0	0	0	0	0	0	0	0	0	0	0	0	0	0	0	0
E4P [y]	0	0	0	0	0	0	0	0	0	0	0	0	0	0	0	0	0	0	0	0	0	0	0	0	0	0	0	0	0	0	0	0	0	0	0	0	0	0	0	0	0	0	0	0	0	0	0	0	0
Xu5P [y]	0	0	0	0	0	0	0	0	0	0	0	0	0	0	0	0	0	0	0	0	0	0	0	0	0	0	0	0	0	0	0	0	0	0	0	0	0	0	0	0	0	0	0	0	0	0	0	0	0
TRK_E4P_Xu5P_complex [y]	0	0	0	0	0	0	0	0	0	0	0	0	0	0	0	0	0	0	0	0	0	0	0	0	0	0	0	0	0	0	0	0	0	0	0	0	0	0	0	0	0	0	0	0	0	0	0	0	0
SBA [y]	0	0	0	0	0	0	0	0	0	0	0	0	0	0	0	0	0	0	0	0	0	0	0	0	0	0	0	0	0	0	0	0	0	0	0	0	0	0	0	0	0	0	0	0	0	0	0	0	0
SBA_DHAP_E4P_complex [y]	0	0	0	0	0	0	0	0	0	0	0	0	0	0	0	0	0	0	0	0	0	0	0	0	0	0	0	0	0	0	0	0	0	0	0	0	0	0	0	0	0	0	0	0	0	0	0	0	0
SBP [y]	0	0	0	0	0	0	0	0	0	0	0	0	0	0	0	0	0	0	0	0	0	0	0	0	0	0	0	0	0	0	0	0	0	0	0	0	0	0	0	0	0	0	0	0	0	0	0	0	0
SBA_SBP_complex [y]	0	0	0	0	0	0	0	0	0	0	0	0	0	0	0	0	0	0	0	0	0	0	0	0	0	0	0	0	0	0	0	0	0	0	0	0	0	0	0	0	0	0	0	0	0	0	0	0	0
SBPase [y]	0	0	0	0	0	0	0	0	0	0	0	0	0	0	0	0	0	0	0	0	0	0	0	0	0	0	0	0	0	0	0	0	0	0	0	0	0	0	0	0	0	0	0	0	0	0	0	0	0
SBPase_SBP_complex [y]	0	0	0	0	0	0	0	0	0	0	0	0	0	0	0	0	0	0	0	0	0	0	0	0	0	0	0	0	0	0	0	0	0	0	0	0	0	0	0	0	0	0	0	0	0	0	0	0	0
S7P [y]	0	0	0	0	0	0	0	0	0	0	0	0	0	0	0	0	0	0	0	0	0	0	0	0	0	0	0	0	0	0	0	0	0	0	0	0	0	0	0	0	0	0	0	0	0	0	0	0	0
TRK_S7P_GAP_complex [y]	0	0	0	0	0	0	0	0	0	0	0	0	0	0	0	0	0	0	0	0	0	0	0	0	0	0	0	0	0	0	0	0	0	0	0	0	0	0	0	0	0	0	0	0	0	0	0	0	0
R5P [y]	0	0	0	0	0	0	0	0	0	0	0	0	0	0	0	0	0	0	0	0	0	0	0	0	0	0	0	0	0	0	0	0	0	0	0	0	0	0	0	0	0	0	0	0	0	0	0	0	0
TRK_R5P_Xu5P_complex [y]	0	0	0	0	0	0	0	0	0	0	0	0	0	0	0	0	0	0	0	0	0	0	0	0	0	0	0	0	0	0	0	0	0	0	0	0	0	0	0	0	0	0	0	0	0	0	0	0	0
RPE [y]	0	0	0	0	0	0	0	0	0	0	0	0	0	0	0	0	0	0	0	0	0	0	0	0	0	0	0	0	0	0	0	0	0	0	0	0	0	0	0	0	0	0	0	0	0	0	0	0	0
RPE_Xu5P_complex [y]	0	0	0	0	0	0	0	0	0	0	0	0	0	0	0	0	0	0	0	0	0	0	0	0	0	0	0	0	0	0	0	0	0	0	0	0	0	0	0	0	0	0	0	0	0	0	0	0	0
Ru5P [y]	0	0	0	0	0	0	0	0	0	0	0	0	0	0	0	0	0	0	0	0	0	0	0	0	0	0	0	0	0	0	0	0	0	0	0	0	0	0	0	0	0	0	0	0	0	0	0	0	0
RPE_Ru5P_complex [y]	0	0	0	0	0	0	0	0	0	0	0	0	0	0	0	0	0	0	0	0	0	0	0	0	0	0	0	0	0	0	0	0	0	0	0	0	0	0	0	0	0	0	0	0	0	0	0	0	0
RPI [y]	0	0	0	0	0	0	0	0	0	0	0	0	0	0	0	0	0	0	0	0	0	0	0	0	0	0	0	0	0	0	0	0	0	0	0	0	0	0	0	0	0	0	0	0	0	0	0	0	0
RPI_R5P_complex [y]	0	0	0	0	0	0	0	0	0	0	0	0	0	0	0	0	0	0	0	0	0	0	0	0	0	0	0	0	0	0	0	0	0	0	0	0	0	0	0	0	0	0	0	0	0	0	0	0	0
RPI_Ru5P_complex [y]	0	0	0	0	0	0	0	0	0	0	0	0	0	0	0	0	0	0	0	0	0	0	0	0	0	0	0	0	0	0	0	0	0	0	0	0	0	0	0	0	0	0	0	0	0	0	0	0	0
PRK [y]	0	0	0	0	0	0	0	0	0	0	0	0	0	0	0	0	0	0	0	0	0	0	0	0	0	0	0	0	0	0	0	0	0	0	0	0	0	0	0	0	0	0	0	0	0	0	0	0	0
PRK_Ru5P_complex [y]	0	0	0	0	0	0	0	0	0	0	0	0	0	0	0	0	0	0	0	0	0	0	0	0	0	0	0	0	0	0	0	0	0	0	0	0	0	0	0	0	0	0	0	0	0	0	0	0	0
PGI [y]	0	0	0	0	0	0	0	0	0	0	0	0	0	0	0	0	0	0	0	0	0	0	0	0	0	0	0	0	0	0	0	0	0	0	0	0	0	0	0	0	0	0	0	0	0	0	0	0	0
PGI_F6P_complex [y]	0	0	0	0	0	0	0	0	0	0	0	0	0	0	0	0	0	0	0	0	0	0	0	0	0	0	0	0	0	0	0	0	0	0	0	0	0	0	0	0	0	0	0	0	0	0	0	0	0
G6P [y]	0	0	0	0	0	0	0	0	0	0	0	0	0	0	0	0	0	0	0	0	0	0	0	0	0	0	0	0	0	0	0	0	0	0	0	0	0	0	0	0	0	0	0	0	0	0	0	0	0
PGI_G6P_complex [y]	0	0	0	0	0	0	0	0	0	0	0	0	0	0	0	0	0	0	0	0	0	0	0	0	0	0	0	0	0	0	0	0	0	0	0	0	0	0	0	0	0	0	0	0	0	0	0	0	0
PGM [y]	0	0	0	0	0	0	0	0	0	0	0	0	0	0	0	0	0	0	0	0	0	0	0	0	0	0	0	0	0	0	0	0	0	0	0	0	0	0	0	0	0	0	0	0	0	0	0	0	0
PGM_G6P_complex [y]	0	0	0	0	0	0	0	0	0	0	0	0	0	0	0	0	0	0	0	0	0	0	0	0	0	0	0	0	0	0	0	0	0	0	0	0	0	0	0	0	0	0	0	0	0	0	0	0	0
G1P [y]	0	0	0	0	0	0	0	0	0	0	0	0	0	0	0	0	0	0	0	0	0	0	0	0	0	0	0	0	0	0	0	0	0	0	0	0	0	0	0	0	0	0	0	0	0	0	0	0	0
PGM_G1P_complex [y]	0	0	0	0	0	0	0	0	0	0	0	0	0	0	0	0	0	0	0	0	0	0	0	0	0	0	0	0	0	0	0	0	0	0	0	0	0	0	0	0	0	0	0	0	0	0	0	0	0
AGPase [y]	0	0	0	0	0	0	0	0	0	0	0	0	0	0	0	0	0	0	0	0	0	0	0	0	0	0	0	0	0	0	0	0	0	0	0	0	0	0	0	0	0	0	0	0	0	0	0	0	0
AGPase_ATP_G1P_complex [y]	0	0	0	0	0	0	0	0	0	0	0	0	0	0	0	0	0	0	0	0	0	0	0	0	0	0	0	0	0	0	0	0	0	0	0	0	0	0	0	0	0	0	0	0	0	0	0	0	0
ADPG [y]	0	0	0	0	0	0	0	0	0	0	0	0	0	0	0	0	0	0	0	0	0	0	0	0	0	0	0	0	0	0	0	0	0	0	0	0	0	0	0	0	0	0	0	0	0	0	0	0	0
AGPase_ADP_ADPG_complex [y]	0	0	0	0	0	0	0	0	0	0	0	0	0	0	0	0	0	0	0	0	0	0	0	0	0	0	0	0	0	0	0	0	0	0	0	0	0	0	0	0	0	0	0	0	0	0	0	0	0
[truncated: 953 more columns]

## Sheet: B_free, bound concentration
Supplementary Table 6B. Concentration [µM] of CBC metabolites seperated into free and enzyme bound metabolite concentration in stroma and pyrenoid, respectively.
	metabolite	average	standard deviation	SAMPLE 1	SAMPLE 2	SAMPLE 3	SAMPLE 4	SAMPLE 5	SAMPLE 6	SAMPLE 7	SAMPLE 8	SAMPLE 9	SAMPLE 10	SAMPLE 11	SAMPLE 12	SAMPLE 13	SAMPLE 14	SAMPLE 15	SAMPLE 16	SAMPLE 17	SAMPLE 18	SAMPLE 19	SAMPLE 20	SAMPLE 21	SAMPLE 22	SAMPLE 23	SAMPLE 24	SAMPLE 25	SAMPLE 26	SAMPLE 27	SAMPLE 28	SAMPLE 29	SAMPLE 30	SAMPLE 31	SAMPLE 32	SAMPLE 33	SAMPLE 34	SAMPLE 35	SAMPLE 36	SAMPLE 37	SAMPLE 38	SAMPLE 39	SAMPLE 40	SAMPLE 41	SAMPLE 42	SAMPLE 43	SAMPLE 44	SAMPLE 45	SAMPLE 46
free stroma	RuBP [s]	0.0617372	0.0210091	0.0545559	0.0568385	0.0585377	0.0949786	0.0255164	0.0979321	0.0753284	0.0782335	0.0357792	0.0693783	0.052348	0.0246803	0.0279153	0.0826705	0.0815814	0.0564549	0.0489345	0.0260392	0.063334	0.0402892	0.0652902	0.0918275	0.06449	0.0718336	0.0726605	0.0451952	0.0617226	0.0848887	0.0254221	0.0599229	0.0972112	0.0784178	0.0776004	0.0424921	0.0448134	0.0454295	0.0911658	0.0795853	0.0686047	0.0842567	0.0642163	0.0585087	0.0702571	0.0882924	0.0461668	0.0604711
	3PGA [s]	545.038	8.30329e-12	545.038	545.038	545.038	545.038	545.038	545.038	545.038	545.038	545.038	545.038	545.038	545.038	545.038	545.038	545.038	545.038	545.038	545.038	545.038	545.038	545.038	545.038	545.038	545.038	545.038	545.038	545.038	545.038	545.038	545.038	545.038	545.038	545.038	545.038	545.038	545.038	545.038	545.038	545.038	545.038	545.038	545.038	545.038	545.038	545.038	545.038
	BPGA [s]	0.588641	1.55509e-15	0.588641	0.588641	0.588641	0.588641	0.588641	0.588641	0.588641	0.588641	0.588641	0.588641	0.588641	0.588641	0.588641	0.588641	0.588641	0.588641	0.588641	0.588641	0.588641	0.588641	0.588641	0.588641	0.588641	0.588641	0.588641	0.588641	0.588641	0.588641	0.588641	0.588641	0.588641	0.588641	0.588641	0.588641	0.588641	0.588641	0.588641	0.588641	0.588641	0.588641	0.588641	0.588641	0.588641	0.588641	0.588641	0.588641
	GAP [s]	58.1375	6.2559e-13	58.1375	58.1375	58.1375	58.1375	58.1375	58.1375	58.1375	58.1375	58.1375	58.1375	58.1375	58.1375	58.1375	58.1375	58.1375	58.1375	58.1375	58.1375	58.1375	58.1375	58.1375	58.1375	58.1375	58.1375	58.1375	58.1375	58.1375	58.1375	58.1375	58.1375	58.1375	58.1375	58.1375	58.1375	58.1375	58.1375	58.1375	58.1375	58.1375	58.1375	58.1375	58.1375	58.1375	58.1375	58.1375	58.1375
	DHAP [s]	400.463	8.70139e-12	400.463	400.463	400.463	400.463	400.463	400.463	400.463	400.463	400.463	400.463	400.463	400.463	400.463	400.463	400.463	400.463	400.463	400.463	400.463	400.463	400.463	400.463	400.463	400.463	400.463	400.463	400.463	400.463	400.463	400.463	400.463	400.463	400.463	400.463	400.463	400.463	400.463	400.463	400.463	400.463	400.463	400.463	400.463	400.463	400.463	400.463
	FBP [s]	90.0235	1.13744e-13	90.0235	90.0235	90.0235	90.0235	90.0235	90.0235	90.0235	90.0235	90.0235	90.0235	90.0235	90.0235	90.0235	90.0235	90.0235	90.0235	90.0235	90.0235	90.0235	90.0235	90.0235	90.0235	90.0235	90.0235	90.0235	90.0235	90.0235	90.0235	90.0235	90.0235	90.0235	90.0235	90.0235	90.0235	90.0235	90.0235	90.0235	90.0235	90.0235	90.0235	90.0235	90.0235	90.0235	90.0235	90.0235	90.0235
	F6P [s]	462.129	2.78672e-12	462.129	462.129	462.129	462.129	462.129	462.129	462.129	462.129	462.129	462.129	462.129	462.129	462.129	462.129	462.129	462.129	462.129	462.129	462.129	462.129	462.129	462.129	462.129	462.129	462.129	462.129	462.129	462.129	462.129	462.129	462.129	462.129	462.129	462.129	462.129	462.129	462.129	462.129	462.129	462.129	462.129	462.129	462.129	462.129	462.129	462.129
	E4P [s]	47.7424	8.81514e-13	47.7424	47.7424	47.7424	47.7424	47.7424	47.7424	47.7424	47.7424	47.7424	47.7424	47.7424	47.7424	47.7424	47.7424	47.7424	47.7424	47.7424	47.7424	47.7424	47.7424	47.7424	47.7424	47.7424	47.7424	47.7424	47.7424	47.7424	47.7424	47.7424	47.7424	47.7424	47.7424	47.7424	47.7424	47.7424	47.7424	47.7424	47.7424	47.7424	47.7424	47.7424	47.7424	47.7424	47.7424	47.7424	47.7424
	Xu5P [s]	0.200784	0.729759	0.109542	0.119839	0.0734945	0.0857518	0.0996581	0.140734	0.151705	0.109435	0.0771163	0.0848178	0.124518	0.0819016	0.134009	0.152431	0.129379	0.161282	0.103305	0.120002	0.186189	0.17139	0.128336	0.152807	0.0978854	0.0479769	0.141692	0.039381	0.109878	0.111454	0.11817	0.198144	0.157348	0.120337	0.154676	0.132292	0.120406	0.149832	0.102618	0.124002	0.151967	0.138907	0.173433	0.0860689	0.154278	0.122093	0.0929377	0.122439
	SBP [s]	186.178	3.41231e-12	186.178	186.178	186.178	186.178	186.178	186.178	186.178	186.178	186.178	186.178	186.178	186.178	186.178	186.178	186.178	186.178	186.178	186.178	186.178	186.178	186.178	186.178	186.178	186.178	186.178	186.178	186.178	186.178	186.178	186.178	186.178	186.178	186.178	186.178	186.178	186.178	186.178	186.178	186.178	186.178	186.178	186.178	186.178	186.178	186.178	186.178
	S7P [s]	1413.56	1.11469e-11	1413.56	1413.56	1413.56	1413.56	1413.56	1413.56	1413.56	1413.56	1413.56	1413.56	1413.56	1413.56	1413.56	1413.56	1413.56	1413.56	1413.56	1413.56	1413.56	1413.56	1413.56	1413.56	1413.56	1413.56	1413.56	1413.56	1413.56	1413.56	1413.56	1413.56	1413.56	1413.56	1413.56	1413.56	1413.56	1413.56	1413.56	1413.56	1413.56	1413.56	1413.56	1413.56	1413.56	1413.56	1413.56	1413.56
	R5P [s]	99.2016	1.15166e-12	99.2016	99.2016	99.2016	99.2016	99.2016	99.2016	99.2016	99.2016	99.2016	99.2016	99.2016	99.2016	99.2016	99.2016	99.2016	99.2016	99.2016	99.2016	99.2016	99.2016	99.2016	99.2016	99.2016	99.2016	99.2016	99.2016	99.2016	99.2016	99.2016	99.2016	99.2016	99.2016	99.2016	99.2016	99.2016	99.2016	99.2016	99.2016	99.2016	99.2016	99.2016	99.2016	99.2016	99.2016	99.2016	99.2016
	Ru5P [s]	78.6824	4.07318	80.7034	80.7034	80.7034	80.7034	80.7034	80.7034	80.7034	80.7034	80.7034	80.7034	80.7034	80.7034	80.7034	80.7034	80.7034	80.7034	80.7034	80.7034	80.7034	80.7034	80.7034	80.7034	80.7034	80.5727	80.7034	80.7034	76.1661	80.7034	80.7034	80.7034	80.7034	80.7034	80.3659	80.7034	80.7034	80.7034	80.7034	80.7034	80.7034	80.7034	80.7034	80.7034	80.7034	80.7034	80.7034	80.7034
	G1P [s]	71.9771	1.47867e-12	71.9771	71.9771	71.9771	71.9771	71.9771	71.9771	71.9771	71.9771	71.9771	71.9771	71.9771	71.9771	71.9771	71.9771	71.9771	71.9771	71.9771	71.9771	71.9771	71.9771	71.9771	71.9771	71.9771	71.9771	71.9771	71.9771	71.9771	71.9771	71.9771	71.9771	71.9771	71.9771	71.9771	71.9771	71.9771	71.9771	71.9771	71.9771	71.9771	71.9771	71.9771	71.9771	71.9771	71.9771	71.9771	71.9771
	G6P [s]	753.077	3.86729e-12	753.077	753.077	753.077	753.077	753.077	753.077	753.077	753.077	753.077	753.077	753.077	753.077	753.077	753.077	753.077	753.077	753.077	753.077	753.077	753.077	753.077	753.077	753.077	753.077	753.077	753.077	753.077	753.077	753.077	753.077	753.077	753.077	753.077	753.077	753.077	753.077	753.077	753.077	753.077	753.077	753.077	753.077	753.077	753.077	753.077	753.077
	ADPG [s]	47.6564	3.41231e-13	47.6564	47.6564	47.6564	47.6564	47.6564	47.6564	47.6564	47.6564	47.6564	47.6564	47.6564	47.6564	47.6564	47.6564	47.6564	47.6564	47.6564	47.6564	47.6564	47.6564	47.6564	47.6564	47.6564	47.6564	47.6564	47.6564	47.6564	47.6564	47.6564	47.6564	47.6564	47.6564	47.6564	47.6564	47.6564	47.6564	47.6564	47.6564	47.6564	47.6564	47.6564	47.6564	47.6564	47.6564	47.6564	47.6564
	ATP [s]	0.0753544	0.0292164	0.0852448	0.10245	0.0361231	0.0158779	0.0823129	0.0103745	0.077824	0.0183552	0.0219931	0.0340746	0.070187	0.0506211	0.0905278	0.089736	0.0362465	0.0415055	0.0741337	0.0990195	0.0628962	0.0649052	0.0696684	0.0314637	0.093826	0.0934937	0.0412429	0.0576542	0.0793505	0.0889569	0.0584665	0.0972557	0.051988	0.0533725	0.109564	0.0684739	0.0482574	0.0502095	0.01	0.11943	0.100226	0.0237773	0.102209	0.0357643	0.080343	0.0790458	0.111506	0.111509
	ADP [s]	3.13011	1.62276	0.778328	1.61135	2.8773	0.728931	1.99411	1.16099	2.95082	0.171822	0.836595	2.55264	1.03026	2.77777	1.42306	2.11644	2.15688	1.50015	1.84337	2.72137	3.02289	0.972619	1.8913	0.159023	2.10056	1.52894	1.971	3.08619	2.68944	1.31487	0.331845	0.738457	1.57943	1.4542	1.91027	2.99081	1.03585	1.66887	0.301642	1.0669	1.56242	0.891795	1.23596	0.87281	1.47158	0.414051	1.33271	1.69632
	NADP [s]	0.0796	5.83159e-16	0.0796	0.0796	0.0796	0.0796	0.0796	0.0796	0.0796	0.0796	0.0796	0.0796	0.0796	0.0796	0.0796	0.0796	0.0796	0.0796	0.0796	0.0796	0.0796	0.0796	0.0796	0.0796	0.0796	0.0796	0.0796	0.0796	0.0796	0.0796	0.0796	0.0796	0.0796	0.0796	0.0796	0.0796	0.0796	0.0796	0.0796	0.0796	0.0796	0.0796	0.0796	0.0796	0.0796	0.0796	0.0796	0.0796
	NADPH [s]	12.6497	3.24014	8.12267	9.78808	10.215	10.3528	12.0126	16.5938	14.259	12.1479	9.63279	9.72186	14.8528	16.4185	7.31982	10.8336	10.0263	13.9312	13.6439	13.9468	16.8829	12.9929	16.0296	14.6349	15.1409	14.1035	15.5026	10.4769	8.33286	6.80155	13.2502	16.2823	7.17925	16.8435	9.4358	13.7595	13.8147	7.67888	9.10737	15.4614	14.3613	8.01649	16.1159	8.23585	15.0637	15.5441	7.8836	12.766
	CO2 [s]	0.0627425	0.0220208	0.0341797	0.0475171	0.0839836	0.0958876	0.060775	0.0361665	0.0955001	0.0838282	0.0929212	0.098308	0.0330857	0.0924343	0.0857039	0.0667176	0.0876267	0.0923318	0.0843923	0.0689734	0.0935959	0.0706331	0.0855322	0.0675229	0.0568214	0.0921743	0.0632243	0.0471431	0.0292994	0.0923346	0.0469241	0.0850346	0.0725247	0.0840524	0.0361517	0.02468	0.0272873	0.0860753	0.0660466	0.0363986	0.0775564	0.0440977	0.052316	0.0796924	0.0464786	0.0850692	0.0727169	0.0628802
free pyrenoid	RuBP [y]	0.0377471	0.0200768	0.0299474	0.0322241	0.0339237	0.0703647	0.01	0.073316	0.0507211	0.0536182	0.0111639	0.0447643	0.0277357	0.01	0.01	0.0580567	0.0569645	0.0318377	0.0243265	0.01	0.0387257	0.0156743	0.0406769	0.0672199	0.0398811	0.0472229	0.0480508	0.0205834	0.0371153	0.0602714	0.01	0.0353085	0.0725974	0.0538025	0.0529931	0.0178809	0.0202025	0.0208179	0.0665502	0.0549737	0.0439914	0.0596478	0.0396019	0.0338969	0.0456427	0.0636841	0.0215548	0.0358602
	3PGA [y]	545.038	8.30329e-12	545.038	545.038	545.038	545.038	545.038	545.038	545.038	545.038	545.038	545.038	545.038	545.038	545.038	545.038	545.038	545.038	545.038	545.038	545.038	545.038	545.038	545.038	545.038	545.038	545.038	545.038	545.038	545.038	545.038	545.038	545.038	545.038	545.038	545.038	545.038	545.038	545.038	545.038	545.038	545.038	545.038	545.038	545.038	545.038	545.038	545.038
	BPGA [y]	0	0	0	0	0	0	0	0	0	0	0	0	0	0	0	0	0	0	0	0	0	0	0	0	0	0	0	0	0	0	0	0	0	0	0	0	0	0	0	0	0	0	0	0	0	0	0	0
	GAP [y]	0	0	0	0	0	0	0	0	0	0	0	0	0	0	0	0	0	0	0	0	0	0	0	0	0	0	0	0	0	0	0	0	0	0	0	0	0	0	0	0	0	0	0	0	0	0	0	0
	DHAP [y]	0	0	0	0	0	0	0	0	0	0	0	0	0	0	0	0	0	0	0	0	0	0	0	0	0	0	0	0	0	0	0	0	0	0	0	0	0	0	0	0	0	0	0	0	0	0	0	0
	FBP [y]	0	0	0	0	0	0	0	0	0	0	0	0	0	0	0	0	0	0	0	0	0	0	0	0	0	0	0	0	0	0	0	0	0	0	0	0	0	0	0	0	0	0	0	0	0	0	0	0
	F6P [y]	0	0	0	0	0	0	0	0	0	0	0	0	0	0	0	0	0	0	0	0	0	0	0	0	0	0	0	0	0	0	0	0	0	0	0	0	0	0	0	0	0	0	0	0	0	0	0	0
	E4P [y]	0	0	0	0	0	0	0	0	0	0	0	0	0	0	0	0	0	0	0	0	0	0	0	0	0	0	0	0	0	0	0	0	0	0	0	0	0	0	0	0	0	0	0	0	0	0	0	0
	Xu5P [y]	0	0	0	0	0	0	0	0	0	0	0	0	0	0	0	0	0	0	0	0	0	0	0	0	0	0	0	0	0	0	0	0	0	0	0	0	0	0	0	0	0	0	0	0	0	0	0	0
	SBP [y]	0	0	0	0	0	0	0	0	0	0	0	0	0	0	0	0	0	0	0	0	0	0	0	0	0	0	0	0	0	0	0	0	0	0	0	0	0	0	0	0	0	0	0	0	0	0	0	0
	S7P [y]	0	0	0	0	0	0	0	0	0	0	0	0	0	0	0	0	0	0	0	0	0	0	0	0	0	0	0	0	0	0	0	0	0	0	0	0	0	0	0	0	0	0	0	0	0	0	0	0
	R5P [y]	0	0	0	0	0	0	0	0	0	0	0	0	0	0	0	0	0	0	0	0	0	0	0	0	0	0	0	0	0	0	0	0	0	0	0	0	0	0	0	0	0	0	0	0	0	0	0	0
	Ru5P [y]	0	0	0	0	0	0	0	0	0	0	0	0	0	0	0	0	0	0	0	0	0	0	0	0	0	0	0	0	0	0	0	0	0	0	0	0	0	0	0	0	0	0	0	0	0	0	0	0
	G1P [y]	0	0	0	0	0	0	0	0	0	0	0	0	0	0	0	0	0	0	0	0	0	0	0	0	0	0	0	0	0	0	0	0	0	0	0	0	0	0	0	0	0	0	0	0	0	0	0	0
	G6P [y]	0	0	0	0	0	0	0	0	0	0	0	0	0	0	0	0	0	0	0	0	0	0	0	0	0	0	0	0	0	0	0	0	0	0	0	0	0	0	0	0	0	0	0	0	0	0	0	0
	ADPG [y]	0	0	0	0	0	0	0	0	0	0	0	0	0	0	0	0	0	0	0	0	0	0	0	0	0	0	0	0	0	0	0	0	0	0	0	0	0	0	0	0	0	0	0	0	0	0	0	0
	ATP [y]	0	0	0	0	0	0	0	0	0	0	0	0	0	0	0	0	0	0	0	0	0	0	0	0	0	0	0	0	0	0	0	0	0	0	0	0	0	0	0	0	0	0	0	0	0	0	0	0
	ADP [y]	0	0	0	0	0	0	0	0	0	0	0	0	0	0	0	0	0	0	0	0	0	0	0	0	0	0	0	0	0	0	0	0	0	0	0	0	0	0	0	0	0	0	0	0	0	0	0	0
	NADP [y]	0	0	0	0	0	0	0	0	0	0	0	0	0	0	0	0	0	0	0	0	0	0	0	0	0	0	0	0	0	0	0	0	0	0	0	0	0	0	0	0	0	0	0	0	0	0	0	0
	NADPH [y]	0	0	0	0	0	0	0	0	0	0	0	0	0	0	0	0	0	0	0	0	0	0	0	0	0	0	0	0	0	0	0	0	0	0	0	0	0	0	0	0	0	0	0	0	0	0	0	0
	CO2 [y]	0.0387535	0.0211012	0.01	0.0229027	0.0593697	0.0712737	0.0361636	0.0115504	0.0708928	0.0592129	0.0683059	0.073694	0.01	0.0678261	0.0610898	0.0421038	0.0630098	0.0677146	0.0597843	0.0443602	0.0689875	0.0460182	0.0609189	0.0429152	0.0322125	0.0675636	0.0386146	0.0225312	0.01	0.0677174	0.0223157	0.0604202	0.0479109	0.0594371	0.0115445	0.01	0.01	0.0614637	0.0414311	0.011787	0.0529431	0.0194888	0.0277016	0.0550806	0.0218642	0.0604608	0.0481049	0.0382692
bound stroma	RuBP [s]	26.1862	0.00504309	26.1923	26.1821	26.1829	26.1829	26.1872	26.1791	26.1942	26.1805	26.1805	26.1829	26.1857	26.1927	26.1825	26.1831	26.1777	26.1772	26.193	26.1841	26.1925	26.1812	26.1839	26.1937	26.1916	26.1884	26.1901	26.1865	26.1944	26.1772	26.1924	26.1821	26.1831	26.1805	26.1944	26.1876	26.1881	26.1869	26.1801	26.1869	26.184	26.1916	26.1821	26.1866	26.1821	26.1924	26.1863	26.1881
	3PGA [s]	9.67203	1.05382	6.36456	10.1887	9.04787	10.1454	9.0889	10.4326	8.86882	9.48518	9.63045	9.4574	10.6156	10.0307	9.78914	8.77276	9.74843	8.95027	8.83508	9.99005	11.1658	7.96338	8.32223	8.98951	10.3807	9.82685	10.256	9.33591	8.84238	10.6542	10.8896	6.97967	8.37066	9.68936	10.8561	9.63531	7.64264	10.4301	9.15157	10.1497	9.2477	9.93349	9.23496	10.7009	9.64229	9.85942	9.41547	10.7368
	BPGA [s]	0.0989857	0.00513939	0.0897735	0.089741	0.0898366	0.0896119	0.0898582	0.0897431	0.0900092	0.0901669	0.0901157	0.0902691	0.0903945	0.0905282	0.0905709	0.0904805	0.0900076	0.0903424	0.0897866	0.0901224	0.0905424	0.0909532	0.0904472	0.0910165	0.0905627	0.0910978	0.0906489	0.0909902	0.0896391	0.0911922	0.090956	0.0908778	0.0912963	0.0913777	0.0914412	0.0915775	0.0912821	0.0904428	0.091242	0.0916207	0.0915196	0.0913141	0.0916371	0.0917169	0.09088	0.0904338	0.0900539	0.0918371
	GAP [s]	0.334198	0.0707398	0.329052	0.43206	0.337516	0.304376	0.366331	0.294467	0.318755	0.364553	0.296154	0.370794	0.278426	0.360974	0.306084	0.275418	0.412844	0.360735	0.20938	0.233909	0.241935	0.290639	0.424505	0.42565	0.272048	0.258839	0.423349	0.306432	0.449526	0.448098	0.440909	0.254642	0.374109	0.392995	0.38785	0.363104	0.353519	0.337269	0.336574	0.429382	0.377053	0.37152	0.330069	0.326744	0.379177	0.21602	0.415353	0.360817
	DHAP [s]	0.143397	0.0312174	0.141574	0.107571	0.156767	0.114025	0.132226	0.0941031	0.144636	0.103196	0.0954621	0.129601	0.0709033	0.157109	0.184165	0.159636	0.138312	0.181848	0.201876	0.135305	0.150294	0.111424	0.158155	0.183913	0.144321	0.0795461	0.158955	0.125495	0.107971	0.120962	0.123197	0.126678	0.100854	0.139539	0.153015	0.128046	0.129238	0.151607	0.125257	0.161104	0.110303	0.100231	0.142554	0.117078	0.129647	0.160415	0.164902	0.172756
	FBP [s]	3.62992	3.006	1.11486	0.747163	5.75857	6.08615	7.99931	1.27871	5.27773	2.36444	0.166675	5.62963	2.38184	2.11039	1.62779	2.68842	4.899	10.2988	1.12586	2.40869	7.98614	0.179251	5.10239	1.72203	1.13971	1.28302	8.42171	0.617294	4.365	1.38894	9.01336	2.83114	0.504598	6.52298	3.64406	3.95588	5.06119	1.96224	2.6031	2.15166	1.98054	3.39888	5.39518	3.32854	2.86339	6.77997	3.78448	7.62944
	F6P [s]	0.0931344	0.025897	0.127158	0.0974453	0.112456	0.0935896	0.065013	0.0984051	0.0574926	0.0996874	0.0557667	0.108392	0.0733981	0.107296	0.0524263	0.0520399	0.0905872	0.142047	0.0772827	0.109799	0.043913	0.0923482	0.0502381	0.144169	0.103676	0.143332	0.0672448	0.101562	0.100202	0.116568	0.113414	0.0999749	0.0599942	0.105256	0.101927	0.104198	0.119047	0.0705231	0.0989669	0.124795	0.0942505	0.111016	0.0778454	0.0983013	0.108868	0.0603823	0.121831	0.125521
	E4P [s]	0.0927687	0.0256033	0.0805428	0.0610144	0.0368938	0.049402	0.0425176	0.105666	0.0774867	0.0750016	0.0604235	0.0883583	0.0596693	0.0808188	0.132633	0.100384	0.0958307	0.111075	0.0758517	0.0784225	0.1216	0.0642004	0.0828154	0.11794	0.0835123	0.0506999	0.096704	0.0419918	0.0883271	0.0896545	0.074578	0.129524	0.0930429	0.0797503	0.0615978	0.0734348	0.0720717	0.112639	0.0661846	0.0695363	0.107703	0.0759956	0.0883998	0.0620423	0.110633	0.10301	0.0883675	0.112159
	Xu5P [s]	0.159444	0.402845	0.140425	0.158313	0.115764	0.132392	0.106333	0.183167	0.179356	0.169121	0.105514	0.138475	0.108354	0.0796516	0.166258	0.197306	0.143905	0.150335	0.134342	0.148655	0.140367	0.153064	0.148638	0.181827	0.0961089	0.097137	0.164987	0.0752852	0.120067	0.154918	0.139989	0.192681	0.217904	0.107959	0.0975003	0.112107	0.14678	0.167967	0.137111	0.130296	0.122818	0.123904	0.139699	0.0876409	0.173806	0.154776	0.102878	0.191313
	SBP [s]	10.7352	7.0101	3.09604	5.25975	6.41228	9.7648	5.19722	10.1867	5.2368	7.23064	8.5809	4.88466	3.13706	3.64188	4.55737	7.68239	13.2994	4.95135	16.0213	12.9117	2.88803	3.20226	12.2145	4.41365	12.1425	2.06304	10.1088	9.06849	11.6477	4.53342	4.37551	11.8681	5.12535	1.7579	5.10299	2.18924	10.5613	17.8035	11.798	6.083	9.03032	11.2474	5.67045	2.57461	15.4562	17.7737	21.1298	3.48867
	S7P [s]	0.0475011	0.0175753	0.0133952	0.0709436	0.0552193	0.0799813	0.0572357	0.0291676	0.0764357	0.0432486	0.0554647	0.0231209	0.0520407	0.0404726	0.0719048	0.0481512	0.0633632	0.0646866	0.0519638	0.0637622	0.0478737	0.0207924	0.0792508	0.0445172	0.0326106	0.0281609	0.0760928	0.0438799	0.018595	0.0418462	0.0585189	0.0182703	0.0667718	0.0426139	0.0645649	0.035703	0.057199	0.0501613	0.0697997	0.0629059	0.0284695	0.0554325	0.0506717	0.0498273	0.0838275	0.027383	0.0567911	0.0754073
	R5P [s]	0.175813	0.403158	0.209922	0.129124	0.123879	0.200488	0.135417	0.181046	0.112692	0.109871	0.239198	0.135619	0.178624	0.142535	0.126234	0.229763	0.219781	0.213038	0.135272	0.139519	0.139414	0.149464	0.160266	0.100043	0.0680862	0.122839	0.300598	0.0985061	0.160665	0.123294	0.20312	0.174527	0.180457	0.0724384	0.121825	0.131776	0.0987874	0.137664	0.110539	0.158129	0.0698826	0.18346	0.168528	0.0685822	0.248935	0.139711	0.207355	0.128617
	Ru5P [s]	0.135967	0.0295679	0.141229	0.154062	0.107894	0.110847	0.140135	0.0801141	0.0998912	0.0833477	0.108196	0.166784	0.183821	0.180897	0.099486	0.121784	0.151549	0.168052	0.132536	0.112583	0.193008	0.122077	0.125472	0.155053	0.163064	0.205934	0.126281	0.127806	0.12802	0.125381	0.14656	0.16929	0.17764	0.20021	0.113028	0.158713	0.18035	0.116285	0.193155	0.145606	0.195319	0.137848	0.141127	0.147233	0.11352	0.102602	0.111837	0.154678
	G1P [s]	0.0862111	0.0265996	0.126202	0.0646728	0.0648448	0.0487021	0.118819	0.0398187	0.0603638	0.0683967	0.068915	0.0282772	0.0409505	0.0506642	0.0658044	0.0591931	0.0470575	0.0598564	0.130681	0.113189	0.0935683	0.0814262	0.082192	0.0947318	0.106725	0.10272	0.0967277	0.0340936	0.0818267	0.0809404	0.0743202	0.0981129	0.0810225	0.0720716	0.0720258	0.0635888	0.10889	0.0936213	0.0825463	0.10316	0.0991642	0.0839529	0.0975586	0.0880174	0.0869251	0.0671149	0.0967113	0.0981978
	G6P [s]	0.0927111	0.0282094	0.110751	0.078059	0.110637	0.0338453	0.053634	0.0477878	0.0699687	0.0570596	0.0601798	0.144242	0.0710072	0.138942	0.0663413	0.112209	0.0520298	0.129619	0.0915637	0.120024	0.0600631	0.105479	0.0942646	0.11901	0.0544472	0.0565636	0.130044	0.0447188	0.119884	0.165992	0.0921267	0.0789314	0.0565239	0.115056	0.0731956	0.0929632	0.0904264	0.10838	0.0757356	0.0792294	0.117406	0.0666934	0.0890554	0.114561	0.11354	0.0949067	0.0937779	0.0867474
	ADPG [s]	0.0434722	0.0205303	0.0739614	0.039857	0.0145008	0.0281956	0.01	0.0242494	0.01	0.0817254	0.0428796	0.0157334	0.0620855	0.0257338	0.0249295	0.01	0.0689948	0.049405	0.0288472	0.0336651	0.0279003	0.0534479	0.0555074	0.0187525	0.0292131	0.0550042	0.0164433	0.0756372	0.0198596	0.076422	0.042425	0.0411341	0.0140632	0.022047	0.0417866	0.0301864	0.0230472	0.0792201	0.0562044	0.0475995	0.041046	0.0386955	0.0516386	0.0261569	0.01	0.0510658	0.0543069	0.0442107
	ATP [s]	9.75707	1.0516	6.47047	10.2744	9.11195	10.1952	9.17272	10.4824	8.95167	9.53694	9.68068	9.51812	10.6987	10.1038	9.87955	8.87476	9.80464	9.01681	8.92875	10.0968	11.2342	8.04299	8.40611	9.04629	10.4821	9.92034	10.3124	9.39698	8.91347	10.7426	10.9601	7.09788	8.45021	9.75104	10.9533	9.70781	7.71988	10.5044	9.21715	10.2514	9.34707	9.98401	9.34632	10.7607	9.74341	9.96075	9.52938	10.8433
	ADP [s]	0.0578874	0.0210473	0.0839614	0.049857	0.0246235	0.0381956	0.02	0.0342494	0.02	0.0917254	0.0528796	0.0257808	0.0720855	0.0357338	0.0349295	0.02	0.0789948	0.059405	0.0388472	0.0436651	0.0379003	0.0634479	0.0656546	0.0287525	0.0392131	0.0650042	0.0264433	0.0868954	0.0298596	0.086422	0.052425	0.0511341	0.0240632	0.032047	0.0524903	0.0401864	0.0330472	0.0892201	0.0662044	0.0575995	0.051046	0.0486955	0.0616386	0.0361569	0.02	0.0610658	0.0643069	0.0542107
	NADP [s]	0.0489874	0.0261154	0.0926389	0.0658076	0.0659915	0.0709467	0.0641851	0.0356163	0.0291084	0.0588406	0.0688519	0.0787997	0.0398094	0.0337234	0.0981366	0.0588911	0.0624697	0.0125691	0.01	0.0420277	0.01	0.0585792	0.0250931	0.0101601	0.0296015	0.0393287	0.0244533	0.0704282	0.089663	0.0961237	0.0532749	0.0169734	0.0877329	0.0131967	0.072041	0.0473769	0.0514234	0.0924895	0.0808946	0.0440732	0.0499314	0.082024	0.0101	0.0867078	0.0148708	0.0298443	0.0894003	0.0583851
	NADPH [s]	0.0845705	0.00387547	0.0797735	0.079741	0.079714	0.0796119	0.0798582	0.0797431	0.0800092	0.0801669	0.0801157	0.0802217	0.0803945	0.0805282	0.0805709	0.0804805	0.0800076	0.0803424	0.0797866	0.0801224	0.0805424	0.0809532	0.0803	0.0810165	0.0805627	0.0810978	0.0806489	0.079732	0.0796391	0.0811922	0.080956	0.0808778	0.0812963	0.0813777	0.0807375	0.0815775	0.0812821	0.0804428	0.081242	0.0816207	0.0815196	0.0813141	0.0816371	0.0817169	0.08088	0.0804338	0.0800539	0.0818371
	CO2 [s]	26.1862	0.00504309	26.1923	26.1821	26.1829	26.1829	26.1872	26.1791	26.1942	26.1805	26.1805	26.1829	26.1857	26.1927	26.1825	26.1831	26.1777	26.1772	26.193	26.1841	26.1925	26.1812	26.1839	26.1937	26.1916	26.1884	26.1901	26.1865	26.1944	26.1772	26.1924	26.1821	26.1831	26.1805	26.1944	26.1876	26.1881	26.1869	26.1801	26.1869	26.184	26.1916	26.1821	26.1866	26.1821	26.1924	26.1863	26.1881
bound pyrenoid	RuBP [y]	1896.87	0.225432	1896.6	1897.06	1897.02	1897.02	1896.83	1897.19	1896.51	1897.13	1897.13	1897.02	1896.89	1896.58	1897.04	1897.01	1897.25	1897.27	1896.57	1896.97	1896.59	1897.09	1896.97	1896.54	1896.63	1896.77	1896.7	1896.86	1896.51	1897.27	1896.59	1897.06	1897.01	1897.13	1896.51	1896.81	1896.79	1896.84	1897.14	1896.84	1896.97	1896.63	1897.06	1896.86	1897.06	1896.59	1896.87	1896.79
	3PGA [y]	0	0	0	0	0	0	0	0	0	0	0	0	0	0	0	0	0	0	0	0	0	0	0	0	0	0	0	0	0	0	0	0	0	0	0	0	0	0	0	0	0	0	0	0	0	0	0	0
	BPGA [y]	0	0	0	0	0	0	0	0	0	0	0	0	0	0	0	0	0	0	0	0	0	0	0	0	0	0	0	0	0	0	0	0	0	0	0	0	0	0	0	0	0	0	0	0	0	0	0	0
	GAP [y]	0	0	0	0	0	0	0	0	0	0	0	0	0	0	0	0	0	0	0	0	0	0	0	0	0	0	0	0	0	0	0	0	0	0	0	0	0	0	0	0	0	0	0	0	0	0	0	0
	DHAP [y]	0	0	0	0	0	0	0	0	0	0	0	0	0	0	0	0	0	0	0	0	0	0	0	0	0	0	0	0	0	0	0	0	0	0	0	0	0	0	0	0	0	0	0	0	0	0	0	0
	FBP [y]	0	0	0	0	0	0	0	0	0	0	0	0	0	0	0	0	0	0	0	0	0	0	0	0	0	0	0	0	0	0	0	0	0	0	0	0	0	0	0	0	0	0	0	0	0	0	0	0
	F6P [y]	0	0	0	0	0	0	0	0	0	0	0	0	0	0	0	0	0	0	0	0	0	0	0	0	0	0	0	0	0	0	0	0	0	0	0	0	0	0	0	0	0	0	0	0	0	0	0	0
	E4P [y]	0	0	0	0	0	0	0	0	0	0	0	0	0	0	0	0	0	0	0	0	0	0	0	0	0	0	0	0	0	0	0	0	0	0	0	0	0	0	0	0	0	0	0	0	0	0	0	0
	Xu5P [y]	0	0	0	0	0	0	0	0	0	0	0	0	0	0	0	0	0	0	0	0	0	0	0	0	0	0	0	0	0	0	0	0	0	0	0	0	0	0	0	0	0	0	0	0	0	0	0	0
	SBP [y]	0	0	0	0	0	0	0	0	0	0	0	0	0	0	0	0	0	0	0	0	0	0	0	0	0	0	0	0	0	0	0	0	0	0	0	0	0	0	0	0	0	0	0	0	0	0	0	0
	S7P [y]	0	0	0	0	0	0	0	0	0	0	0	0	0	0	0	0	0	0	0	0	0	0	0	0	0	0	0	0	0	0	0	0	0	0	0	0	0	0	0	0	0	0	0	0	0	0	0	0
	R5P [y]	0	0	0	0	0	0	0	0	0	0	0	0	0	0	0	0	0	0	0	0	0	0	0	0	0	0	0	0	0	0	0	0	0	0	0	0	0	0	0	0	0	0	0	0	0	0	0	0
	Ru5P [y]	0	0	0	0	0	0	0	0	0	0	0	0	0	0	0	0	0	0	0	0	0	0	0	0	0	0	0	0	0	0	0	0	0	0	0	0	0	0	0	0	0	0	0	0	0	0	0	0
	G1P [y]	0	0	0	0	0	0	0	0	0	0	0	0	0	0	0	0	0	0	0	0	0	0	0	0	0	0	0	0	0	0	0	0	0	0	0	0	0	0	0	0	0	0	0	0	0	0	0	0
	G6P [y]	0	0	0	0	0	0	0	0	0	0	0	0	0	0	0	0	0	0	0	0	0	0	0	0	0	0	0	0	0	0	0	0	0	0	0	0	0	0	0	0	0	0	0	0	0	0	0	0
	ADPG [y]	0	0	0	0	0	0	0	0	0	0	0	0	0	0	0	0	0	0	0	0	0	0	0	0	0	0	0	0	0	0	0	0	0	0	0	0	0	0	0	0	0	0	0	0	0	0	0	0
	ATP [y]	0	0	0	0	0	0	0	0	0	0	0	0	0	0	0	0	0	0	0	0	0	0	0	0	0	0	0	0	0	0	0	0	0	0	0	0	0	0	0	0	0	0	0	0	0	0	0	0
	ADP [y]	0	0	0	0	0	0	0	0	0	0	0	0	0	0	0	0	0	0	0	0	0	0	0	0	0	0	0	0	0	0	0	0	0	0	0	0	0	0	0	0	0	0	0	0	0	0	0	0
	NADP [y]	0	0	0	0	0	0	0	0	0	0	0	0	0	0	0	0	0	0	0	0	0	0	0	0	0	0	0	0	0	0	0	0	0	0	0	0	0	0	0	0	0	0	0	0	0	0	0	0
	NADPH [y]	0	0	0	0	0	0	0	0	0	0	0	0	0	0	0	0	0	0	0	0	0	0	0	0	0	0	0	0	0	0	0	0	0	0	0	0	0	0	0	0	0	0	0	0	0	0	0	0
	CO2 [y]	1896.87	0.225432	1896.6	1897.06	1897.02	1897.02	1896.83	1897.19	1896.51	1897.13	1897.13	1897.02	1896.89	1896.58	1897.04	1897.01	1897.25	1897.27	1896.57	1896.97	1896.59	1897.09	1896.97	1896.54	1896.63	1896.77	1896.7	1896.86	1896.51	1897.27	1896.59	1897.06	1897.01	1897.13	1896.51	1896.81	1896.79	1896.84	1897.14	1896.84	1896.97	1896.63	1897.06	1896.86	1897.06	1896.59	1896.87	1896.79
[truncated: 954 more columns]

## Sheet: C_flux
Supplementary Table 6C. Reaction flux in µM/s for 1,000 sampled flux distributions. For further information on reaction names see Supplementary file 3.
reaction	average	standard deviation	SAMPLE 1	SAMPLE 2	SAMPLE 3	SAMPLE 4	SAMPLE 5	SAMPLE 6	SAMPLE 7	SAMPLE 8	SAMPLE 9	SAMPLE 10	SAMPLE 11	SAMPLE 12	SAMPLE 13	SAMPLE 14	SAMPLE 15	SAMPLE 16	SAMPLE 17	SAMPLE 18	SAMPLE 19	SAMPLE 20	SAMPLE 21	SAMPLE 22	SAMPLE 23	SAMPLE 24	SAMPLE 25	SAMPLE 26	SAMPLE 27	SAMPLE 28	SAMPLE 29	SAMPLE 30	SAMPLE 31	SAMPLE 32	SAMPLE 33	SAMPLE 34	SAMPLE 35	SAMPLE 36	SAMPLE 37	SAMPLE 38	SAMPLE 39	SAMPLE 40	SAMPLE 41	SAMPLE 42	SAMPLE 43	SAMPLE 44	SAMPLE 45	SAMPLE 46	SAMPLE 47
Diffusion CO2 c-s	398	0	398	398	398	398	398	398	398	398	398	398	398	398	398	398	398	398	398	398	398	398	398	398	398	398	398	398	398	398	398	398	398	398	398	398	398	398	398	398	398	398	398	398	398	398	398	398	398
Diffusion CO2 c-s_rev	0	0	0	0	0	0	0	0	0	0	0	0	0	0	0	0	0	0	0	0	0	0	0	0	0	0	0	0	0	0	0	0	0	0	0	0	0	0	0	0	0	0	0	0	0	0	0	0	0
Diffusion CO2 s-y	627.425	220.208	341.797	475.171	839.836	958.876	607.75	361.665	955.001	838.282	929.212	983.08	330.857	924.343	857.039	667.176	876.267	923.318	843.923	689.734	935.959	706.331	855.322	675.229	568.214	921.743	632.243	471.431	292.994	923.346	469.241	850.346	725.247	840.524	361.517	246.8	272.873	860.753	660.466	363.986	775.564	440.977	523.16	796.924	464.786	850.692	727.169	628.802	295.512
Diffusion CO2 s-y_rev	381.305	220.207	95.7119	229.027	593.697	712.737	361.636	115.504	708.928	592.129	683.059	736.94	84.7342	678.261	610.898	421.038	630.098	677.146	597.843	443.602	689.875	460.182	609.189	429.152	322.125	675.636	386.146	225.312	46.9219	677.174	223.157	604.202	479.109	594.371	115.445	0.687619	26.7636	614.637	414.311	117.87	529.431	194.888	277.016	550.806	218.642	604.608	481.049	382.692	49.3788
Rubisco carboxylase 1 s	377.114	134.415	442.982	222.491	607.545	494.614	596.785	539.187	426.011	398.119	433.895	547.192	443.982	520.471	353.976	533.795	554.036	382.693	582.933	251.377	317.144	171.296	405.493	580.068	359.163	550.308	389.726	163.446	175.59	293.089	267.202	287.666	472.303	240.89	370.992	547.198	560.915	482.917	157.038	288.962	250.303	363.132	603.133	239.424	174.182	453.505	417.868	368.353	361.174
Rubisco carboxylase 1 s_rev	225.233	134.415	291.067	70.6355	455.684	342.754	444.899	387.348	274.084	246.272	282.048	395.331	292.104	368.554	202.117	381.933	402.205	230.866	431.014	99.5089	165.228	19.4446	253.626	428.144	207.251	398.416	237.823	11.5645	23.6621	141.262	115.286	135.81	320.441	89.0433	219.065	395.31	409.024	331.033	5.19276	137.078	98.4357	211.22	451.277	87.5419	22.3262	301.589	265.987	216.462	209.307
Rubisco carboxylase 2 s	151.88	0.0292499	151.915	151.856	151.861	151.861	151.886	151.839	151.927	151.847	151.847	151.861	151.877	151.917	151.858	151.862	151.83	151.828	151.919	151.868	151.916	151.851	151.867	151.924	151.911	151.893	151.903	151.881	151.927	151.828	151.916	151.856	151.862	151.847	151.928	151.888	151.891	151.884	151.845	151.884	151.867	151.911	151.856	151.882	151.856	151.916	151.881	151.891	151.867
Phosphoglycerate kinase 1 s	910.326	70.9657	866.831	975.114	989.757	881.889	940.878	931.548	767.986	966.406	934.931	946.472	924.465	990.058	931.047	992.603	997.357	966.425	976.351	916.512	975.294	942.602	865.732	860.775	945.168	926.338	905.793	946.627	804.228	929.09	964.275	934.261	846.112	864.456	989.819	949.993	842.556	954.295	805.807	983.178	958.655	847.573	865.618	987.033	826.754	984.339	911.039	976.977	950.513
Phosphoglycerate kinase 1 s_rev	91.1059	75.5803	327.753	112.129	223.403	22.5723	171.049	47.9032	16.7975	163.012	119.232	145.431	25.3231	140.459	101.906	249.551	171.666	208.338	228.02	70.3546	29.5501	268.104	160.839	99.3637	65.923	94.0039	37.1075	155.876	55.2791	26.6789	41.9223	343.083	137.117	43.7673	70.3046	133.883	195.224	70.8678	30.669	123.501	175.375	6.20638	83.4175	80.6695	10.0515	149.246	113.549	67.5713	95.7936
Phosphoglycerate kinase 2 s	819.221	89.2589	539.078	862.984	766.354	859.316	769.83	883.645	751.189	803.395	815.699	801.042	899.142	849.599	829.141	743.052	825.692	758.088	748.332	846.158	945.744	674.498	704.893	761.411	879.245	832.334	868.685	790.751	748.949	902.411	922.353	591.178	708.995	820.689	919.514	816.11	647.332	883.427	775.138	859.678	783.28	841.367	782.201	906.364	816.702	835.093	797.49	909.405	854.719
Phosphoglycerate kinase 3 s	186.462	94.8269	45.8156	94.8506	169.37	43.725	117.381	112.588	173.697	41.0435	49.2454	150.259	60.6455	163.511	83.7669	124.582	126.963	88.3051	108.508	160.191	177.94	57.2523	111.329	9.36073	123.647	89.9994	116.021	181.666	158.312	77.3985	19.5337	43.4686	92.9717	85.6003	112.446	176.051	60.9746	98.2365	26.2511	62.8021	91.9703	52.4947	72.7537	51.3772	86.6234	24.3727	78.4489	99.8523	128.588
Phosphoglycerate kinase 3 s_rev	114.941	70.1502	5.40692	60.4003	101.227	21.4816	81.3245	44.1922	88.9186	22.6986	47.2921	49.7852	11.8892	97.7739	39.4476	32.0127	63.0955	69.8108	62.3954	63.536	85.475	34.6468	101.472	2.21198	83.3546	7.11472	41.8308	69.0844	64.6145	4.87669	10.4182	24.007	89.8209	62.6059	107.037	97.6646	12.6305	95.2985	2.37695	32.2799	45.906	9.66483	57.3742	2.27799	84.9927	12.4653	68.3597	80.3582	95.8739
Phosphoglycerate kinase 4 s	71.5206	55.6803	40.4087	34.4503	68.143	22.2434	36.0569	68.3957	84.7788	18.3449	1.95334	100.474	48.7563	65.7368	44.3193	92.5697	63.8672	18.4943	46.1128	96.6548	92.4649	22.6056	9.85778	7.14875	40.2927	82.8847	74.1904	112.582	93.6972	72.5218	9.11556	19.4616	3.15081	22.9944	5.40913	78.3868	48.3441	2.93798	23.8741	30.5221	46.0643	42.8299	15.3794	49.0992	1.63072	11.9074	10.0892	19.4941	32.7141
Glyceraldehyde-3-phosphate dehydrogenase 1 s	924.537	49.5429	958.927	821.077	858.926	934.422	984.68	976.778	839.341	917.963	849.943	982.128	874.299	966.462	922.758	823.664	801.894	820.048	803.133	820.964	993.794	990.486	943.568	861.468	891.254	830.192	912.548	940.311	950.775	845.385	920.753	958.441	816.657	991.475	878.302	863.792	933.172	911.613	956.137	910.124	947.178	853.864	948.649	930.515	886.714	914.991	901.039	984.389	893.355
Glyceraldehyde-3-phosphate dehydrogenase 1 s_rev	78.8318	50.8215	161.192	23.667	61.7862	138.302	186.098	179.347	39.2489	116.293	48.7856	179.91	70.3543	161.18	117.049	18.8587	1.81855	16.6236	5.26762	19.7395	188.37	180.954	140.568	51.3035	85.6269	19.214	106.059	142.991	154.384	33.4627	111.192	149.662	3.69341	177.699	70.9262	48.0174	120.351	107.185	143.717	93.9176	131.982	40.7231	132.279	113.345	77.9135	110.654	100.5	166.018	72.4117
Glyceraldehyde-3-phosphate dehydrogenase 2 s	845.705	38.7547	797.735	797.41	797.14	796.119	798.582	797.431	800.092	801.669	801.157	802.217	803.945	805.282	805.709	804.805	800.076	803.424	797.866	801.224	805.424	809.532	803	810.165	805.627	810.978	806.489	797.32	796.391	811.922	809.56	808.778	812.963	813.777	807.375	815.775	812.821	804.428	812.42	816.207	815.196	813.141	816.371	817.169	808.8	804.338	800.539	818.371	820.944
Glyceraldehyde-3-phosphate dehydrogenase 3 s	534.792	269.865	928.124	659.486	661.054	709.587	644.433	357.594	295.176	594.075	693.676	794.214	406.039	346.517	991.074	597.716	628.772	133.116	71.897	425.501	33.1645	599.324	257.931	115.766	305.642	408.265	255.022	705.602	897.021	977.159	546.309	182.512	894.292	149.744	731.785	493.544	531.055	933.323	825.365	460.939	518.51	837.381	121.371	888.248	161.509	306.781	898.542	606.222	590.933
Glyceraldehyde-3-phosphate dehydrogenase 3 s_rev	485.087	268.566	926.389	658.076	659.915	709.467	641.851	356.163	291.084	588.406	688.519	787.997	398.094	337.234	981.366	588.911	624.697	125.691	70.0311	420.277	23.7409	585.792	250.931	101.601	296.015	393.287	244.533	704.282	896.63	961.237	532.749	169.734	877.329	131.967	720.41	473.769	514.234	924.895	808.946	440.732	499.314	820.24	101	867.078	148.708	298.443	894.003	583.851	565.989
Glyceraldehyde-3-phosphate dehydrogenase 4 s	49.7051	38.7547	1.73462	1.41049	1.13955	0.119308	2.58201	1.43088	4.09175	5.66917	5.15742	6.21733	7.94455	9.28204	9.70859	8.80501	4.07551	7.4244	1.86585	5.22431	9.42361	13.5319	7.00014	14.1649	9.62746	14.9778	10.4889	1.32005	0.390805	15.9223	13.5605	12.7782	16.9631	17.7769	11.3753	19.7747	16.8207	8.42799	16.4198	20.2066	19.1958	17.1408	20.3706	21.1694	12.8003	8.33781	4.53921	22.3713	24.9435
Triosephosphate isomerase 1 s	726.421	203.887	720.472	835.089	904.52	813.702	866.11	896.499	886.619	943.575	478.6	939.112	391.013	849.542	310.489	597.927	656.95	494.317	478.71	270.076	675.87	669.195	940.219	953.744	406.212	646.5	863.758	642.135	846.138	713.278	720.416	817.373	711.134	781.991	937.755	870.945	995.001	451.545	789.617	780.166	693.871	972.794	788.051	964.012	874.088	701.784	844.011	748.929	516.14
Triosephosphate isomerase 1 s_rev	251.111	173.738	251.909	184.146	555.723	608.294	392.671	534.106	473.315	366.444	108.27	382.686	52.8297	221.505	72.3668	229.566	7.65361	53.1462	333.395	66.4843	351.713	256.617	155.501	163.8	161.063	337.944	80.5009	420.879	144.343	27.3718	29.4944	348.558	114.296	18.9955	509.492	235.455	505.847	127.62	415.439	91.1139	6.26666	491.251	156.089	593.135	283.476	423.923	270.839	358.785	51.8708
Triosephosphate isomerase 2 s	475.31	198.72	468.563	650.943	348.797	205.409	473.438	362.393	413.304	577.131	370.33	556.426	338.183	628.036	238.122	368.361	649.296	441.171	145.316	203.592	324.157	412.578	784.718	789.944	245.15	308.556	783.257	221.256	701.794	685.906	690.922	468.815	596.838	762.995	428.263	635.49	489.153	323.925	374.178	689.052	687.605	481.542	631.962	370.877	590.612	277.861	573.172	390.143	464.27
Triosephosphate isomerase 3 s	622.647	240.797	747.683	670.952	784.898	348.173	404.373	167.875	763.125	672.668	382.817	178.509	240.235	511.672	671.738	944.155	919.259	432.211	970.311	617.893	527.494	836.33	930.366	874.939	795.266	381.841	911.265	282.559	227.291	607.957	445.186	563.818	923.178	705.19	914.742	730.361	511.687	594.918	787.242	966.326	647.562	255.273	991.983	667.899	831.439	620.514	828.855	711.738	761.308
Triosephosphate isomerase 3 s_rev	371.587	234.5	322.337	347.988	708.075	263.804	390.303	94.4973	141.099	463.362	130.048	138.876	176.807	503.029	633.525	861.583	442.111	34.887	876.467	596.991	429.225	655.597	624.307	690.625	469.581	195.736	384.815	235.64	141.606	362.665	35.6911	340.112	535.934	226.225	549.968	394.742	280.849	484.944	520.543	218.888	381.093	232.704	684.965	147.263	520.427	94.7916	629.312	180.132	238.644
Triosephosphate isomerase 4 s	251.06	181.889	425.346	322.964	76.8231	84.3696	14.0704	73.378	622.026	209.306	252.77	39.6323	63.4284	8.6427	38.2132	82.5721	477.149	397.324	93.844	20.9017	98.2692	180.733	306.058	184.315	325.685	186.105	526.45	46.9189	85.6844	245.293	409.495	223.705	387.244	478.964	364.774	335.62	230.838	109.974	266.698	747.438	266.468	22.5696	307.018	520.636	311.012	525.723	199.543	531.606	522.665
Aldolase 1a s	705.986	199.942	558.589	646.357	783.627	826.508	828.104	631.022	644.869	510.252	468.703	784.046	560.889	748.543	734.91	556.133	742.85	990.607	943.421	372.682	600.313	443.902	932.009	912.563	737.015	370.497	834.233	988.084	650.629	630.171	772.741	694.363	301.939	950.342	980.68	946.234	931.234	661.728	491.349	826.855	637.013	738.643	514.925	635.047	355.025	929.324	776.095	635.081	699.322
Aldolase 1a s_rev	297.383	200.978	59.4568	503.781	184.104	344.08	118.512	436.912	43.8903	215.261	343.772	194.307	332.855	470.339	488.467	106.34	263.42	138.513	647.162	39.3127	11.8331	157.352	373.968	628.213	576.246	109.68	161.427	699.387	97.4352	442.452	179.646	158.165	49.8794	402.659	736.964	503.749	277.235	491.084	148.025	591.761	320.039	394.78	8.63606	349.634	59.8663	390.187	395.843	107.614	418.382
Aldolase 2a s	408.604	190.295	499.132	142.577	599.523	482.428	709.593	194.11	600.979	294.99	124.93	589.739	228.034	278.204	246.443	449.793	479.43	852.095	296.258	333.369	588.48	286.55	558.041	284.35	160.769	260.816	672.806	288.697	553.194	187.719	593.094	536.198	252.059	547.683	243.716	442.485	654	170.643	343.324	235.094	316.973	343.863	506.289	285.413	295.159	539.137	380.253	527.468	280.94
Aldolase 3a s	617.845	250.331	689.088	105.881	531.207	946.294	953.46	202.433	496.241	485.393	854.541	671.43	883.234	785.473	460.886	526.365	965.974	778.834	509.955	636.882	792.504	28.0815	427.961	370.212	931.447	873.793	563.199	160.606	703.849	454.234	666.783	967.633	665.442	626.077	559.78	640.619	426.5	347.026	680.764	148.31	980.114	315.685	699.572	387.616	326.495	694.35	314.333	928.97	320.824
Aldolase 3a s_rev	390.208	247.536	619.953	63.4366	162.14	555.46	438.761	121.74	157.518	334.02	844.532	309.79	733.481	652.073	358.288	354.756	653.386	115.813	440.144	482.677	279.411	18.305	103.552	260.266	860.392	792.194	24.565	122.406	424.07	365.292	89.118	788.385	636.205	209.366	330.626	389.077	102.18	224.561	514.843	12.7275	854.592	101.952	355.129	173.605	144.932	260.694	75.3459	440.257	146.546
Aldolase 4a s	227.637	176.413	69.1351	42.444	369.068	390.834	514.699	80.6931	338.722	151.373	10.0093	361.64	149.753	133.4	102.598	171.609	312.588	663.021	69.8106	154.205	513.093	9.77648	324.409	109.946	71.0547	81.5989	538.634	38.1998	279.779	88.9415	577.665	179.248	29.237	416.711	229.154	251.542	324.32	122.466	165.921	135.583	125.522	213.733	344.443	214.011	181.563	433.656	238.987	488.713	174.278
Fructose-1,6-bisphosphatase 1 s	596.811	237.641	541.494	991.304	596.381	358.672	234.029	389.963	458.718	319.239	148.496	430.867	679.16	566.624	515.087	545.787	693.546	382.709	661.654	223.91	387.549	317.954	961.578	194.653	470.59	246.177	842.182	417.507	463.391	119.42	588.558	878.036	735.931	754.384	927.391	750.98	569.873	683.638	484.239	595.491	536.044	982.034	711.581	176.765	598.106	671.679	933.866	563.818	213.162
Fructose-1,6-bisphosphatase 1 s_rev	415.844	234.523	111.497	891.171	365.925	267.078	39.1345	276.545	196.461	175.622	33.5744	202.768	600.879	421.82	371.242	267.603	526.704	193.636	435.206	44.7465	312.161	41.18	727.947	20.2486	380.876	66.9597	708.011	167.01	189.976	20.6422	573.129	521.086	513.109	623.412	912.83	560.037	240.193	635.46	306.837	495.98	344.593	851.904	549.736	105.363	484.511	566.198	792.6	525.062	106.501
Fructose-1,6-bisphosphatase 2 s	180.967	90.8324	429.997	100.133	230.455	91.5937	194.894	113.417	262.257	143.617	114.921	228.099	78.2814	144.804	143.845	278.184	166.842	189.073	226.448	179.164	75.3877	276.774	233.632	174.404	89.7141	179.217	134.172	250.497	273.415	98.7777	15.4291	356.951	222.822	130.972	14.5617	190.943	329.679	48.1777	177.403	99.5111	191.451	130.13	161.845	71.402	113.595	105.481	141.266	38.7553	106.662
Transketolase 1a s	666.17	216.829	443.459	972.793	770.675	581.479	589.714	876.373	401.176	796.829	531.032	693.251	987.938	878.066	287.265	165.579	683.716	776.702	639.651	663.372	454.242	980.752	462.319	941.951	957.355	931.253	461.768	796.348	937.139	950.902	681.654	441.348	234.71	988.753	831.616	697.908	383.128	756.109	462.955	889.971	810.378	997.396	623.498	768.138	842.625	432.976	912.537	912.202	621.352
Transketolase 1a s_rev	307.979	210.906	101.977	453.92	529.142	442.891	254.235	91.1637	95.7425	618.105	276.349	244.392	457.951	534.935	121.478	24.0203	465.132	102.344	243.597	319.326	163.428	378.171	145.905	738.86	795.099	737.623	229.371	565.695	778.244	326.198	32.5907	267.469	60.705	427.331	326.193	286.024	38.7926	494.461	57.1449	588.816	627.319	479.6	312.533	315.555	84.512	208.214	595.976	326.436	384.767
Transketolase 2a s	358.191	181.881	341.481	518.873	241.534	138.588	335.48	785.21	305.433	178.724	254.683	448.858	529.988	343.131	165.787	141.558	218.584	674.358	396.053	344.047	290.815	602.582	316.414	203.091	162.256	193.629	232.397	230.653	158.895	624.705	649.063	173.879	174.005	561.423	505.423	411.884	344.336	261.648	405.81	301.154	183.059	517.796	310.965	452.583	758.113	224.762	316.561	585.766	236.585
Transketolase 3a s	593.065	241.243	522.981	572.14	169.411	103.642	281.897	671.899	724.274	522.469	368.172	404.94	594.476	391.018	639.793	727.742	617.687	769.996	493.204	572.916	888.909	818.257	612.705	729.536	467.328	229.053	676.47	169.717	524.584	532.108	564.173	945.987	751.216	574.519	738.46	631.595	574.849	715.333	489.921	592.014	725.526	663.177	828.008	410.913	736.558	582.901	443.706	584.553	385.391
Transketolase 3a s_rev	367.54	240.375	314.167	185.934	60.5444	97.7208	79.0839	19.3565	551.507	476.411	246.155	88.7483	197.155	180.553	606.672	718.85	531.769	228.304	229.818	361.536	730.761	348.342	428.957	659.112	437.739	168.09	576.74	71.7311	498.356	40.0704	47.7764	904.775	709.878	145.763	365.704	352.377	363.18	586.352	216.777	423.526	675.135	278.048	649.71	90.9973	111.111	490.806	259.812	131.454	281.473
Transketolase 4a s	225.525	181.881	208.815	386.206	108.867	5.92147	202.813	652.543	172.767	46.0574	122.016	316.192	397.321	210.465	33.1207	8.89169	85.9177	541.692	263.387	211.38	158.148	469.915	183.748	70.4244	29.5892	60.9628	99.7299	97.9863	26.2282	492.038	516.397	41.2124	41.3382	428.756	372.756	279.218	211.669	128.981	273.144	168.488	50.3919	385.129	178.298	319.916	625.446	92.0952	183.894	453.099	103.918
Aldolase 1b s	680.655	201.689	660.674	339.165	513.054	731.486	391.416	752.216	233.688	538.058	665.711	781.877	369.818	780.891	925.895	501.124	714.691	785.228	608.161	839.456	649.409	230.306	476.336	722.906	615.03	482.29	736.434	633.159	433.927	610.141	431.038	575.231	408.051	504.438	463.209	528.532	413.981	690.22	543.786	516.521	720.851	619.681	409.351	456.779	584.983	580.444	700.176	847.795	922.471
Aldolase 1b s_rev	318.736	209.446	491.261	115.227	260.072	394.02	169.053	404.118	10.3281	264.453	358.079	567.391	199.372	597.724	719.657	216.135	288.153	569.061	113.031	422.689	485.238	58.217	77.1392	520.289	217.645	338.908	390.299	313.24	49.0124	404.506	229.383	184.763	187.5	368.747	243.221	381.971	56.4446	150.18	155.083	271.837	401.894	244.853	175.063	300.507	104.096	41.1538	76.3139	668.488	750.277
Aldolase 2b s	361.919	176.654	169.413	223.938	252.982	337.465	222.363	348.098	223.36	273.605	307.631	214.486	170.446	183.168	206.238	284.989	426.538	216.167	495.13	416.767	164.171	172.089	399.197	202.616	397.384	143.381	346.135	319.918	384.915	205.635	201.655	390.468	220.551	135.692	219.988	146.561	357.537	540.04	388.703	244.684	318.957	374.827	234.288	156.273	480.888	539.29	623.862	179.307	172.194
Aldolase 3b s	608.01	251.324	804.623	941.412	567.527	466.413	147.996	854.089	728.115	368.317	486.03	631.721	58.8363	415.392	692.529	164.8	782.541	134.813	891.128	822.93	264.936	637.553	769.662	778.891	665.248	765.629	643.272	627.121	737.387	635.094	608.851	423.515	139.219	203.97	744.67	187.584	994.661	928.576	475.06	177.871	298.436	903.751	527.03	35.1517	671.187	983.215	868.962	250.035	63.4872
Aldolase 3b s_rev	378.757	240.918	767.877	850.14	447.211	261.614	58.2996	638.659	637.422	227.379	311.065	549.902	21.0565	364.891	618.958	12.4773	488.67	51.3134	528.665	538.83	233.432	598.13	503.131	708.941	400.53	754.915	429.804	439.869	485.138	562.126	539.862	165.714	51.3339	200.945	657.348	173.689	769.791	521.202	219.024	65.8534	112.146	661.59	425.409	11.5456	322.966	576.592	377.767	203.394	23.9594
Aldolase 4b s	229.253	176.654	36.7462	91.2716	120.315	204.799	89.696	215.431	90.6934	140.938	174.964	81.8194	37.7798	50.5012	73.5717	152.322	293.871	83.4999	362.463	284.1	31.5042	39.4228	266.53	69.9498	264.717	10.7144	213.468	187.252	252.248	72.968	68.9887	257.801	87.8848	3.02496	87.3213	13.8948	224.87	407.374	256.036	112.017	186.29	242.161	101.621	23.6061	348.221	406.623	491.196	46.6405	39.5278
Sedoheptulose-1,7-phosphatase 1 s	579.176	248.256	968.57	264.1	581.734	989.699	788.895	493.19	866.187	336.634	197.476	848.836	208.079	505.304	700.065	501.684	627.13	670.89	892.133	305.685	658.539	757.161	450.674	885.137	715.709	510.894	916.193	278.334	609.796	962.546	287.881	594.178	490.656	686.194	248.351	327.797	510.805	569.391	220.023	888.707	514.591	249.835	615.853	431.049	407.403	363.305	511.444	704.183	313.12
Sedoheptulose-1,7-phosphatase 1 s_rev	446.51	248.256	835.904	131.433	449.068	857.033	656.229	360.524	733.521	203.968	64.8093	716.169	75.4123	372.637	567.399	369.017	494.463	538.223	759.467	173.018	525.872	624.494	318.007	752.47	583.042	378.227	783.526	145.667	477.129	829.88	155.214	461.511	357.99	553.528	115.685	195.13	378.139	436.724	87.3568	756.041	381.925	117.169	483.186	298.383	274.737	230.639	378.777	571.516	180.453
Sedoheptulose-1,7-phosphatase 2 s	132.667	1.59241e-12	132.667	132.667	132.667	132.667	132.667	132.667	132.667	132.667	132.667	132.667	132.667	132.667	132.667	132.667	132.667	132.667	132.667	132.667	132.667	132.667	132.667	132.667	132.667	132.667	132.667	132.667	132.667	132.667	132.667	132.667	132.667	132.667	132.667	132.667	132.667	132.667	132.667	132.667	132.667	132.667	132.667	132.667	132.667	132.667	132.667	132.667	132.667
Transketolase 1b s	670.266	215.097	267.302	820.417	755.262	875.855	762.849	443.266	826.754	805.089	642.091	366.181	821.252	653.29	861.324	860.459	962.838	985.742	622.608	781.234	772.282	412.781	927.056	464.441	351.192	402.317	764.418	696.541	285.183	570.141	855.792	336.193	984.616	624.219	884.893	471.072	841.363	695.57	877.928	875.593	368.747	724.513	890.657	736.171	862.579	305.638	835.139	981.165	700.171
Transketolase 1b s_rev	308.942	216.061	133.35	110.981	203.069	76.042	190.492	291.676	62.3971	372.602	87.4434	231.209	520.407	404.726	142.275	481.512	329.206	338.876	102.97	637.622	478.737	207.924	134.549	19.2697	25.0859	120.708	3.48986	438.799	99.2328	151.679	585.189	182.703	667.718	426.139	645.649	114.042	571.99	501.613	179.932	629.059	84.0517	554.325	506.717	498.273	24.3046	31.8078	267.229	754.073	68.1966
Transketolase 2b s	361.324	182.5	133.952	709.436	552.193	799.813	572.357	151.59	764.357	432.486	554.647	134.972	300.845	248.564	719.048	378.947	633.632	646.866	519.638	143.612	293.545	204.858	792.508	445.172	326.106	281.609	760.928	257.742	185.95	418.462	270.603	153.49	316.897	198.079	239.243	357.03	269.373	193.958	697.997	246.534	284.695	170.189	383.94	237.898	838.275	273.83	567.911	227.091	631.974
Transketolase 3b s	617.495	248.851	424.383	839.659	729.078	850.672	988.624	654.907	736.294	957.381	744.079	572.863	567.746	266.639	904.591	984.666	666.314	592.399	837.538	596.375	268.828	571.783	779.225	844.954	338.458	401.24	835.454	390.666	265.949	871.463	494.759	467.432	851.09	180.724	324.404	659.635	393.519	361.909	981.721	382.449	225.003	165.788	449.395	222.936	967.428	619.821	717.498	979.647	942.107
Transketolase 3b s_rev	388.838	244.574	423.098	262.89	309.551	183.526	548.934	635.983	104.604	657.562	322.099	570.558	399.568	150.742	318.209	738.386	165.348	78.1991	450.567	585.429	107.95	499.592	119.384	532.449	145.018	252.298	207.192	265.59	212.665	585.667	356.823	446.609	666.86	115.312	217.828	435.272	256.813	300.618	416.391	268.582	72.9749	128.266	198.121	117.704	261.82	478.657	282.254	885.222	442.799
Transketolase 4b s	228.657	182.5	1.28528	576.77	419.526	667.147	439.69	18.9236	631.691	299.82	421.98	2.30574	168.179	115.898	586.381	246.28	500.965	514.2	386.971	10.9456	160.878	72.1908	659.841	312.505	193.439	148.942	628.262	125.075	53.2837	285.796	137.936	20.8231	184.231	65.4128	106.577	224.363	136.706	61.291	565.33	113.867	152.028	37.5219	251.274	105.231	705.608	141.163	435.244	94.4247	499.308
Ribulose-5-phosphate epimerase 1 s	733.096	175.217	916.804	639.943	716.094	901.34	419.332	881.238	700.832	905.535	482.288	743.683	292.192	825.089	915.265	977.125	430.98	892.037	999.738	629.529	812.047	728.279	492.656	924.663	437.407	819.696	650.392	461.954	796.451	662.889	914.42	697.775	830.825	817.611	745.597	647.18	988.993	841.799	729.86	644.202	753.443	892.371	830.569	571.34	493.126	994.402	586.815	924.33	653.634
Ribulose-5-phosphate epimerase 1 s_rev	267.726	181.559	249.817	19.7923	86.8432	344.564	107.747	543.145	90.4722	348.296	95.2838	245.687	5.5413	435.309	469.531	461.304	24.6689	444.582	370.276	89.9459	512.027	167.147	95.0756	297.959	107.496	550.982	205.52	74.6925	306.797	191.419	387.752	122.351	28.5218	535.527	384.419	313.756	141.187	49.0986	197.218	33.3509	352.429	166.723	496.007	132.552	86.1227	416.11	253.093	349.524	30.4366
Ribulose-5-phosphate epimerase 2 s	465.371	154.461	666.987	620.151	629.251	556.775	311.585	338.093	610.359	557.239	387.005	497.996	286.65	389.779	445.734	515.821	406.311	447.455	629.462	539.583	300.021	561.132	397.58	626.704	329.911	268.714	444.872	387.262	489.653	471.47	526.668	575.423	802.304	282.083	361.178	333.424	847.806	792.7	532.642	610.851	401.014	725.648	334.562	438.789	407.003	578.292	333.722	574.806	623.198
Ribulose-5-phosphate epimerase 3 s	593.481	248.88	686.136	433.175	657.762	504.111	199.559	132.732	669.018	457.254	260.615	932.671	992.04	814.217	562.368	322.251	807.424	927.631	957.403	285.716	830.015	362.291	476.032	388.131	649.845	908.036	309.783	887.161	690.55	908.201	885.611	884.711	752.716	867.718	266.414	497.364	630.382	656.99	971.845	908.109	966.35	574.648	551.8	716.769	242.78	559.344	87.2663	970.248	750.004
Ribulose-5-phosphate epimerase 3 s_rev	393.444	247.733	284.483	78.3576	293.844	212.669	153.306	59.9717	323.992	165.349	138.944	700.009	970.722	689.771	381.967	71.7633	666.446	745.51	593.274	11.4665	795.328	66.4923	343.785	26.7599	585.268	904.656	130.244	765.233	466.23	702.065	624.276	574.621	215.746	850.968	170.569	429.273	47.9089	129.623	704.537	562.591	830.669	114.334	482.572	543.314	101.11	246.385	18.8775	660.776	392.14
Ribulose-5-phosphate epimerase 4 s	200.037	154.461	401.654	354.818	363.918	291.442	46.2521	72.7599	345.026	291.905	121.671	232.663	21.3171	124.446	180.401	250.488	140.978	182.122	364.129	274.249	34.6873	295.798	132.247	361.371	64.5772	3.38045	179.539	121.928	224.32	206.137	261.335	310.09	536.97	16.7501	95.8449	68.091	582.473	527.367	267.308	345.518	135.681	460.314	69.2284	173.455	141.67	312.959	68.3888	309.472	357.864
Ribose-5-phosphate isomerase 1 s	665.321	213.662	611.88	661.464	713.005	653.064	957.269	717.726	410.718	549.533	922.472	477.623	514.585	501.979	770.207	962.261	749.258	719.161	560.603	475.192	749.818	807.49	439.624	335.076	274.258	626.761	824.638	346.634	962.496	495.227	625.142	754.472	802.333	811.79	887.889	820.988	517.261	661.397	446.806	606.162	678.248	859.898	764.8	470.32	939.298	477.604	755.643	150.641	979.837
Ribose-5-phosphate isomerase 1 s_rev	279	180.249	35.295	415.687	431.178	192.884	680.268	313.705	240.358	397.778	244.792	207.366	37.5683	63.5124	537.677	425.88	165.545	163.196	250.261	196.633	325.575	465.192	115.296	174.091	106.584	290.985	6.70359	99.136	482.966	272.566	49.1566	307.732	410.961	602.269	543.744	517.413	265.776	291.245	261.026	154.59	490.15	272.919	271.503	274.888	325.692	161.655	192.066	12.7146	106.593
Ribose-5-phosphate isomerase 2 s	386.322	175.852	576.585	245.777	281.827	460.18	277.001	404.021	170.36	151.754	677.68	270.257	477.017	438.466	232.53	536.381	583.714	555.965	310.342	278.559	424.243	342.298	324.328	160.985	167.673	335.776	817.934	247.498	479.53	222.661	575.985	446.74	391.372	209.521	344.145	303.575	251.485	370.151	185.78	451.572	188.098	586.979	493.297	195.433	613.606	315.949	563.577	137.926	873.244
Ribose-5-phosphate isomerase 3 s	623.178	240.683	837.293	813.836	466.179	746.544	994.377	574.495	293.58	162.659	817.76	671.042	653.543	910.139	103.132	783.634	601.682	633.593	244.713	486.835	973.79	692.933	631.842	819.473	525.897	959.795	750.334	126.496	762.829	228.758	842.106	885.858	933.421	829.99	688.661	930.761	905.656	372.812	724.334	486.176	653.443	974.479	399.616	593.786	938.965	217.91	788.771	326.027	807.647
Ribose-5-phosphate isomerase 3 s_rev	369.524	237.01	393.374	700.726	317.019	419.031	850.043	303.141	255.886	143.572	272.746	533.452	309.193	604.339	3.26864	379.919	150.635	210.295	67.0378	340.943	682.213	483.302	440.181	791.155	490.891	756.685	65.0667	11.6642	415.965	138.764	398.788	571.784	674.715	753.136	477.183	759.852	786.838	135.327	671.221	167.272	598.011	520.167	38.9865	531.02	458.026	34.6282	357.861	320.768	67.0699
Ribose-5-phosphate isomerase 4 s	253.655	175.852	443.918	113.11	149.16	327.514	144.334	271.354	37.6932	19.0875	545.014	137.59	344.35	305.8	99.8631	403.715	451.047	423.299	177.675	145.892	291.577	209.631	191.662	28.318	35.0066	203.109	685.267	114.831	346.863	89.9941	443.319	314.074	258.706	76.8544	211.478	170.909	118.818	237.485	53.113	318.905	55.4316	454.313	360.63	62.766	480.939	183.282	430.91	5.25976	740.577
Phosphoribulokinase 1 s	769.978	160.367	964.719	883.072	508.309	626.454	691.764	747.448	658.584	682.054	670.618	832.382	921.134	912.86	910.892	961.635	606.828	909.712	952.408	908.643	850.54	839.668	868.756	572.616	952.48	753.304	617.456	785.211	604.382	810.987	560.814	944.498	962.714	726.614	880.523	588.932	832.19	618.671	953.794	972.567	922.511	785.434	966.064	729.614	910.589	927.782	985.462	963.24	637.139
Phosphoribulokinase 1 s_rev	371.978	160.367	566.719	485.072	110.309	228.454	293.764	349.448	260.584	284.054	272.618	434.382	523.134	514.86	512.892	563.635	208.828	511.712	554.408	510.643	452.54	441.668	470.756	174.616	554.48	355.304	219.456	387.211	206.382	412.987	162.814	546.498	564.714	328.614	482.523	190.932	434.19	220.671	555.794	574.567	524.511	387.434	568.064	331.614	512.589	529.782	587.462	565.24	239.139
Phosphoribulokinase 2 s	398	0	398	398	398	398	398	398	398	398	398	398	398	398	398	398	398	398	398	398	398	398	398	398	398	398	398	398	398	398	398	398	398	398	398	398	398	398	398	398	398	398	398	398	398	398	398	398	398
Phosphoglucoisomerase 1 s	641.491	240.187	953.354	603.277	784.67	655.022	618.711	242.771	374.397	747.373	452.373	890.647	235.9	733.146	685.706	543.119	761.009	779.961	752.226	890.892	195.67	588.077	228.959	756.939	329.362	775.119	748.1	669.588	319.497	598.721	870.99	953.317	744.537	924.69	725.503	807.373	952.538	247.691	721.426	972.584	370.707	821.964	482.664	803.99	517.982	740.508	987.583	942.478	887.912
Phosphoglucoisomerase 1 s_rev	341.877	230.147	23.2567	147.696	595.415	493.005	314.65	198.842	104.904	378.769	281.318	635.057	203.993	538.029	327.23	378.84	320.268	33.8477	375.453	136.945	148.315	267.176	42.9925	702.825	87.7029	695.696	440.052	449.923	95.7234	540.976	385.912	221.037	318.6	491.142	211.652	177.281	106.4	36.9205	583.859	313.445	55.5211	592.361	16.743	530.43	330.563	379.061	622.338	669.44	791.309
Phosphoglucoisomerase 2 s	299.614	196.265	930.097	455.581	189.255	162.017	304.061	43.9299	269.493	368.603	171.055	255.589	31.9067	195.117	358.476	164.278	440.74	746.114	376.773	753.947	47.3549	320.901	185.967	54.1143	241.659	79.423	308.048	219.665	223.774	57.7449	485.078	732.28	425.937	433.548	513.851	630.092	846.138	210.77	137.567	659.139	315.186	229.603	465.921	273.56	187.419	361.447	365.245	273.039	96.6037
Phosphoglucoisomerase 3 s	617.032	239.558	699.948	957.321	701.227	395.806	376.634	105.327	536.851	472.81	532.966	836.592	696.364	850.211	808.774	868.117	415.807	730.618	402.545	768.991	388.34	627.657	472.79	383.243	517.225	414.236	538.043	221.124	831.41	994.165	771.286	820.302	663.688	842.905	853.592	984.149	755.971	872.296	201.991	845.001	849.276	607.713	930.842	861.831	990.289	426.207	870.381	946.791	746.043
Phosphoglucoisomerase 3 s_rev	365.718	240.385	67.1807	469.206	609.761	192.717	134.801	42.1474	396.949	115.157	344.165	676.435	610.072	667.231	461.477	849.356	9.24171	40.9112	119.554	61.542	283.706	450.863	387.788	370.867	232.613	381.364	231.499	119.289	748.384	902.531	168.971	312.306	327.906	407.662	221.636	412.333	106.846	577.037	109.16	152.706	592.874	375.574	494.1	527.006	783.799	37.5744	513.735	579.841	623.435
Phosphoglucoisomerase 4 s	251.314	190.209	632.767	488.115	91.4664	203.09	241.833	63.1795	139.903	357.653	188.801	160.157	86.2919	182.98	347.297	18.7609	406.565	689.707	282.992	707.449	104.634	176.794	85.0017	12.3769	284.612	32.8722	306.543	101.834	83.0259	91.6339	602.316	507.996	335.782	435.243	631.956	571.815	649.125	295.259	92.8307	692.294	256.401	232.139	436.742	334.825	206.49	388.632	356.646	366.95	122.609
Phosphoglucomutase 1 s	639.4	236.814	883.17	535.302	898.299	153.876	388.055	391.557	532.723	268.307	327.33	967.492	5.49006	997.395	368.754	471.148	197.517	837.432	784.202	921.221	496.673	918.683	907.107	937.458	421.603	245.059	995.798	482.922	494.901	955.033	548.682	476.385	372.061	938.142	74.7076	417.522	457.072	724.55	804.527	113.495	745.145	473.353	630.113	993.166	399.128	720.926	772.141	509.913	358.192
Phosphoglucomutase 1 s_rev	341.031	227.326	408.421	292.475	401.69	18.5124	294.507	377.878	229.985	212.943	69.6976	765.987	3.33679	722.192	166.818	198.416	83.7839	606.482	632.645	492.795	316.924	314.755	352.248	118.225	259.86	184.272	993.897	327.899	44.4428	757.388	229.731	195.067	142.604	715.322	34.4857	357.816	201.934	217.784	648.196	85.1836	163.963	291.361	233.659	374.56	47.5223	560.434	348.097	222.28	219.481
Phosphoglucomutase 2 s	298.368	198.299	474.748	242.827	496.609	135.363	93.5486	13.6795	302.738	55.3646	257.633	201.506	2.15328	275.203	201.936	272.732	113.733	230.95	151.558	428.426	179.749	603.928	554.858	819.233	161.743	60.7874	1.90158	155.023	450.458	197.646	318.951	281.318	229.457	222.82	40.2219	59.7061	255.138	506.766	156.331	28.3112	581.183	181.992	396.454	618.605	351.606	160.491	424.044	287.633	138.711
Phosphoglucomutase 3 s	620.761	246.523	947.037	284.564	804.471	563.457	779.28	331.116	285.817	608.803	860.225	215.964	158.028	553.709	457.683	262.745	386.028	619.399	982.333	956.527	941.726	523.804	487.174	878.057	812.651	504.477	801.736	165.392	815.051	569.931	787.968	402.538	718.739	726.455	389.734	310.321	808.856	710.678	837.058	650.229	999.65	916.825	797.296	712.881	555.697	318.631	422.905	863.239	774.018
Phosphoglucomutase 3 s_rev	370.692	244.368	769.62	9.20247	405.651	387.021	747.959	298.187	112.668	564.389	584.847	109.891	101.49	290.644	266.926	135.531	306.47	444.856	924.556	574.598	704.699	63.9838	33.2809	100.562	607.956	490.24	801.339	128.199	505.341	338.396	351.78	345.504	579.438	501.94	231.407	308.892	750.73	119.423	725.463	588.762	477.252	732.296	430.021	33.0112	185.02	130.954	7.46026	481.695	609.301
Phosphoglucomutase 4 s	250.068	190.616	177.418	275.361	398.82	176.436	31.3212	32.9291	173.149	44.4142	275.378	106.074	56.5385	263.066	190.758	127.214	79.5576	174.543	57.7764	381.928	237.028	459.821	453.893	777.495	204.696	14.2366	0.39662	37.193	309.711	231.535	436.189	57.0336	139.301	224.514	158.327	1.42971	58.1259	591.255	111.595	61.4668	522.398	184.529	367.275	679.87	370.677	187.677	415.445	381.544	164.716
Glucose-1-phosphate adenylyltransferase 1 s	542.496	210.575	613.567	737.403	260.004	114.285	592.464	74.6725	560.155	132.115	158.3	245.259	505.186	364.356	651.592	645.894	260.892	298.744	533.593	712.713	452.708	467.169	501.453	226.467	675.332	672.94	296.855	414.978	571.142	640.286	420.825	700.018	374.194	384.16	788.611	492.855	347.343	361.393	66.3119	859.626	721.401	171.142	735.669	257.421	578.285	568.949	802.586	802.612	239.029
Glucose-1-phosphate adenylyltransferase 1 s_rev	270.703	197.661	121.167	371.367	17.2067	84.6743	440.233	2.60829	430.49	119.578	53.9971	72.3783	197.17	215.998	391.119	456.401	164.105	145.036	151.34	557.293	230.984	112.728	133.426	169.822	459.297	536.957	130.917	212.737	312.926	471.008	113.812	64.3934	143.407	165.385	488.85	165.859	9.17605	344.958	7.17808	416.786	252.156	107.233	190.104	57.1168	498.574	85.4765	250.918	500.283	237.639
Glucose-1-phosphate adenylyltransferase 2 s	271.793	174.143	492.4	366.036	242.797	29.6105	152.231	72.0642	129.665	12.5373	104.303	172.881	308.015	148.357	260.474	189.493	96.7872	153.709	382.253	155.421	221.724	354.441	368.027	56.6443	216.035	135.983	165.938	202.241	258.216	169.278	307.013	635.625	230.787	218.775	299.761	326.997	338.167	16.4347	59.1338	442.839	469.244	63.9097	545.565	200.304	79.7112	483.472	551.668	302.329	1.38949
Glucose-1-phosphate adenylyltransferase 3 s	585.48	248.816	934.684	668.832	212.83	352.64	134.633	333.808	38.3366	818.841	550.845	234.783	983.255	393.558	460.773	52.6615	752.559	591.352	475.768	445.575	506.504	744.813	822.136	202.432	551.119	639.475	218.081	840.783	316.064	967.387	791.649	601.227	183.885	395.126	488.585	570.585	371.626	893.125	576.442	595.238	511.325	453.401	866.792	355.053	176.185	615.747	614.604	838.347	833.48
Glucose-1-phosphate adenylyltransferase 3 s_rev	361.987	241.167	739.614	270.262	67.8213	281.956	44.6297	242.494	38.2614	817.254	428.796	157.334	620.855	257.338	211.478	8.68608	689.948	494.05	187.296	336.651	227.501	534.479	555.074	187.525	292.131	550.042	53.6484	756.372	198.596	764.22	367.399	189.887	43.253	174.656	70.7184	301.864	230.472	792.201	562.044	119.243	100.866	386.955	350.406	93.4847	77.4023	105.089	71.5354	442.107	806.085
Glucose-1-phosphate adenylyltransferase 4 s	223.493	163.401	195.07	398.57	145.008	70.6835	90.0037	91.3138	0.0752338	1.58695	122.048	77.4486	362.401	136.22	249.295	43.9755	62.6118	97.3018	288.472	108.923	279.003	210.334	267.062	14.9068	258.988	89.4324	164.433	84.4109	117.468	203.167	424.25	411.341	140.632	220.47	417.866	268.72	141.154	100.924	14.3977	475.995	410.46	66.4465	516.386	261.569	98.7825	510.658	543.069	396.24	27.3945
ADPGstore s	521.257	267.581	590.918	326.957	433.134	616.006	981.34	175.502	328.039	150.416	285.1	649.987	183.745	545.959	194.668	674.392	898.499	239.403	291.009	840.007	392.22	169.444	813.708	768.028	462.375	562.419	645.672	389.853	232.474	67.5655	362.549	300.201	849.96	159.91	164.938	868.385	579.652	437.909	206.548	192.525	473.877	308.304	970.74	365.649	560.169	553.047	635.269	212.871	895.701
ADPGstore s_rev	472.957	269.15	293.587	359.491	335.345	657.079	919.112	194.752	198.449	139.465	302.846	554.554	238.131	533.821	183.489	528.875	864.324	182.996	197.228	793.51	449.499	25.3365	712.743	726.291	505.328	515.868	644.167	272.023	91.726	101.454	479.786	75.9166	759.804	161.604	283.043	810.109	382.64	522.398	161.812	225.68	415.093	310.841	941.561	426.914	579.24	580.232	626.669	306.782	921.706
Rubisco carboxylase 1 y	611.107	217.817	717.579	360.637	984.724	801.684	967.024	874.129	690.003	645.375	703.371	886.902	719.489	843.082	573.746	865.176	898.283	620.495	944.24	407.407	513.731	277.668	657.19	939.557	581.826	891.648	631.394	264.858	284.397	475.212	432.832	466.28	765.509	390.498	600.885	886.653	908.851	782.53	254.573	468.24	405.669	588.255	977.622	387.976	282.333	734.618	677.145	596.844	585.361
Rubisco carboxylase 1 y_rev	364.988	217.817	471.494	114.493	738.585	555.544	720.91	627.968	443.93	399.222	457.217	640.762	473.366	596.999	327.604	619.038	652.114	374.323	698.16	161.274	267.647	31.5195	411.056	693.481	335.737	645.541	385.297	18.7399	38.3249	229.04	186.748	220.136	519.371	144.345	354.812	640.541	662.742	536.414	8.41797	222.124	159.536	342.166	731.478	141.858	36.1887	488.534	431.026	350.735	339.228
Rubisco carboxylase 2 y	246.12	0.0292499	246.085	246.144	246.139	246.139	246.114	246.161	246.073	246.153	246.153	246.139	246.123	246.083	246.142	246.138	246.17	246.172	246.081	246.132	246.084	246.149	246.133	246.076	246.089	246.107	246.097	246.119	246.073	246.172	246.084	246.144	246.138	246.153	246.072	246.112	246.109	246.116	246.155	246.116	246.133	246.089	246.144	246.118	246.144	246.084	246.119	246.109	246.133
Phosphoglycerate kinase 1 y	0	0	0	0	0	0	0	0	0	0	0	0	0	0	0	0	0	0	0	0	0	0	0	0	0	0	0	0	0	0	0	0	0	0	0	0	0	0	0	0	0	0	0	0	0	0	0	0	0
Phosphoglycerate kinase 1 y_rev	0	0	0	0	0	0	0	0	0	0	0	0	0	0	0	0	0	0	0	0	0	0	0	0	0	0	0	0	0	0	0	0	0	0	0	0	0	0	0	0	0	0	0	0	0	0	0	0	0
Phosphoglycerate kinase 2 y	0	0	0	0	0	0	0	0	0	0	0	0	0	0	0	0	0	0	0	0	0	0	0	0	0	0	0	0	0	0	0	0	0	0	0	0	0	0	0	0	0	0	0	0	0	0	0	0	0
Phosphoglycerate kinase 3 y	0	0	0	0	0	0	0	0	0	0	0	0	0	0	0	0	0	0	0	0	0	0	0	0	0	0	0	0	0	0	0	0	0	0	0	0	0	0	0	0	0	0	0	0	0	0	0	0	0
Phosphoglycerate kinase 3 y_rev	0	0	0	0	0	0	0	0	0	0	0	0	0	0	0	0	0	0	0	0	0	0	0	0	0	0	0	0	0	0	0	0	0	0	0	0	0	0	0	0	0	0	0	0	0	0	0	0	0
Phosphoglycerate kinase 4 y	0	0	0	0	0	0	0	0	0	0	0	0	0	0	0	0	0	0	0	0	0	0	0	0	0	0	0	0	0	0	0	0	0	0	0	0	0	0	0	0	0	0	0	0	0	0	0	0	0
Glyceraldehyde-3-phosphate dehydrogenase 1 y	0	0	0	0	0	0	0	0	0	0	0	0	0	0	0	0	0	0	0	0	0	0	0	0	0	0	0	0	0	0	0	0	0	0	0	0	0	0	0	0	0	0	0	0	0	0	0	0	0
Glyceraldehyde-3-phosphate dehydrogenase 1 y_rev	0	0	0	0	0	0	0	0	0	0	0	0	0	0	0	0	0	0	0	0	0	0	0	0	0	0	0	0	0	0	0	0	0	0	0	0	0	0	0	0	0	0	0	0	0	0	0	0	0
Glyceraldehyde-3-phosphate dehydrogenase 2 y	0	0	0	0	0	0	0	0	0	0	0	0	0	0	0	0	0	0	0	0	0	0	0	0	0	0	0	0	0	0	0	0	0	0	0	0	0	0	0	0	0	0	0	0	0	0	0	0	0
Glyceraldehyde-3-phosphate dehydrogenase 3 y	0	0	0	0	0	0	0	0	0	0	0	0	0	0	0	0	0	0	0	0	0	0	0	0	0	0	0	0	0	0	0	0	0	0	0	0	0	0	0	0	0	0	0	0	0	0	0	0	0
Glyceraldehyde-3-phosphate dehydrogenase 3 y_rev	0	0	0	0	0	0	0	0	0	0	0	0	0	0	0	0	0	0	0	0	0	0	0	0	0	0	0	0	0	0	0	0	0	0	0	0	0	0	0	0	0	0	0	0	0	0	0	0	0
Glyceraldehyde-3-phosphate dehydrogenase 4 y	0	0	0	0	0	0	0	0	0	0	0	0	0	0	0	0	0	0	0	0	0	0	0	0	0	0	0	0	0	0	0	0	0	0	0	0	0	0	0	0	0	0	0	0	0	0	0	0	0
Triosephosphate isomerase 1 y	0	0	0	0	0	0	0	0	0	0	0	0	0	0	0	0	0	0	0	0	0	0	0	0	0	0	0	0	0	0	0	0	0	0	0	0	0	0	0	0	0	0	0	0	0	0	0	0	0
Triosephosphate isomerase 1 y_rev	0	0	0	0	0	0	0	0	0	0	0	0	0	0	0	0	0	0	0	0	0	0	0	0	0	0	0	0	0	0	0	0	0	0	0	0	0	0	0	0	0	0	0	0	0	0	0	0	0
Triosephosphate isomerase 2 y	0	0	0	0	0	0	0	0	0	0	0	0	0	0	0	0	0	0	0	0	0	0	0	0	0	0	0	0	0	0	0	0	0	0	0	0	0	0	0	0	0	0	0	0	0	0	0	0	0
Triosephosphate isomerase 3 y	0	0	0	0	0	0	0	0	0	0	0	0	0	0	0	0	0	0	0	0	0	0	0	0	0	0	0	0	0	0	0	0	0	0	0	0	0	0	0	0	0	0	0	0	0	0	0	0	0
Triosephosphate isomerase 3 y_rev	0	0	0	0	0	0	0	0	0	0	0	0	0	0	0	0	0	0	0	0	0	0	0	0	0	0	0	0	0	0	0	0	0	0	0	0	0	0	0	0	0	0	0	0	0	0	0	0	0
Triosephosphate isomerase 4 y	0	0	0	0	0	0	0	0	0	0	0	0	0	0	0	0	0	0	0	0	0	0	0	0	0	0	0	0	0	0	0	0	0	0	0	0	0	0	0	0	0	0	0	0	0	0	0	0	0
Aldolase 1a y	0	0	0	0	0	0	0	0	0	0	0	0	0	0	0	0	0	0	0	0	0	0	0	0	0	0	0	0	0	0	0	0	0	0	0	0	0	0	0	0	0	0	0	0	0	0	0	0	0
Aldolase 1a y_rev	0	0	0	0	0	0	0	0	0	0	0	0	0	0	0	0	0	0	0	0	0	0	0	0	0	0	0	0	0	0	0	0	0	0	0	0	0	0	0	0	0	0	0	0	0	0	0	0	0
Aldolase 2a y	0	0	0	0	0	0	0	0	0	0	0	0	0	0	0	0	0	0	0	0	0	0	0	0	0	0	0	0	0	0	0	0	0	0	0	0	0	0	0	0	0	0	0	0	0	0	0	0	0
Aldolase 3a y	0	0	0	0	0	0	0	0	0	0	0	0	0	0	0	0	0	0	0	0	0	0	0	0	0	0	0	0	0	0	0	0	0	0	0	0	0	0	0	0	0	0	0	0	0	0	0	0	0
Aldolase 3a y_rev	0	0	0	0	0	0	0	0	0	0	0	0	0	0	0	0	0	0	0	0	0	0	0	0	0	0	0	0	0	0	0	0	0	0	0	0	0	0	0	0	0	0	0	0	0	0	0	0	0
Aldolase 4a y	0	0	0	0	0	0	0	0	0	0	0	0	0	0	0	0	0	0	0	0	0	0	0	0	0	0	0	0	0	0	0	0	0	0	0	0	0	0	0	0	0	0	0	0	0	0	0	0	0
Fructose-1,6-bisphosphatase 1 y	0	0	0	0	0	0	0	0	0	0	0	0	0	0	0	0	0	0	0	0	0	0	0	0	0	0	0	0	0	0	0	0	0	0	0	0	0	0	0	0	0	0	0	0	0	0	0	0	0
Fructose-1,6-bisphosphatase 1 y_rev	0	0	0	0	0	0	0	0	0	0	0	0	0	0	0	0	0	0	0	0	0	0	0	0	0	0	0	0	0	0	0	0	0	0	0	0	0	0	0	0	0	0	0	0	0	0	0	0	0
Fructose-1,6-bisphosphatase 2 y	0	0	0	0	0	0	0	0	0	0	0	0	0	0	0	0	0	0	0	0	0	0	0	0	0	0	0	0	0	0	0	0	0	0	0	0	0	0	0	0	0	0	0	0	0	0	0	0	0
Transketolase 1a y	0	0	0	0	0	0	0	0	0	0	0	0	0	0	0	0	0	0	0	0	0	0	0	0	0	0	0	0	0	0	0	0	0	0	0	0	0	0	0	0	0	0	0	0	0	0	0	0	0
Transketolase 1a y_rev	0	0	0	0	0	0	0	0	0	0	0	0	0	0	0	0	0	0	0	0	0	0	0	0	0	0	0	0	0	0	0	0	0	0	0	0	0	0	0	0	0	0	0	0	0	0	0	0	0
Transketolase 2a y	0	0	0	0	0	0	0	0	0	0	0	0	0	0	0	0	0	0	0	0	0	0	0	0	0	0	0	0	0	0	0	0	0	0	0	0	0	0	0	0	0	0	0	0	0	0	0	0	0
Transketolase 3a y	0	0	0	0	0	0	0	0	0	0	0	0	0	0	0	0	0	0	0	0	0	0	0	0	0	0	0	0	0	0	0	0	0	0	0	0	0	0	0	0	0	0	0	0	0	0	0	0	0
Transketolase 3a y_rev	0	0	0	0	0	0	0	0	0	0	0	0	0	0	0	0	0	0	0	0	0	0	0	0	0	0	0	0	0	0	0	0	0	0	0	0	0	0	0	0	0	0	0	0	0	0	0	0	0
Transketolase 4a y	0	0	0	0	0	0	0	0	0	0	0	0	0	0	0	0	0	0	0	0	0	0	0	0	0	0	0	0	0	0	0	0	0	0	0	0	0	0	0	0	0	0	0	0	0	0	0	0	0
Aldolase 1b y	0	0	0	0	0	0	0	0	0	0	0	0	0	0	0	0	0	0	0	0	0	0	0	0	0	0	0	0	0	0	0	0	0	0	0	0	0	0	0	0	0	0	0	0	0	0	0	0	0
Aldolase 1b y_rev	0	0	0	0	0	0	0	0	0	0	0	0	0	0	0	0	0	0	0	0	0	0	0	0	0	0	0	0	0	0	0	0	0	0	0	0	0	0	0	0	0	0	0	0	0	0	0	0	0
Aldolase 2b y	0	0	0	0	0	0	0	0	0	0	0	0	0	0	0	0	0	0	0	0	0	0	0	0	0	0	0	0	0	0	0	0	0	0	0	0	0	0	0	0	0	0	0	0	0	0	0	0	0
Aldolase 3b y	0	0	0	0	0	0	0	0	0	0	0	0	0	0	0	0	0	0	0	0	0	0	0	0	0	0	0	0	0	0	0	0	0	0	0	0	0	0	0	0	0	0	0	0	0	0	0	0	0
Aldolase 3b y_rev	0	0	0	0	0	0	0	0	0	0	0	0	0	0	0	0	0	0	0	0	0	0	0	0	0	0	0	0	0	0	0	0	0	0	0	0	0	0	0	0	0	0	0	0	0	0	0	0	0
Aldolase 4b y	0	0	0	0	0	0	0	0	0	0	0	0	0	0	0	0	0	0	0	0	0	0	0	0	0	0	0	0	0	0	0	0	0	0	0	0	0	0	0	0	0	0	0	0	0	0	0	0	0
Sedoheptulose-1,7-phosphatase 1 y	0	0	0	0	0	0	0	0	0	0	0	0	0	0	0	0	0	0	0	0	0	0	0	0	0	0	0	0	0	0	0	0	0	0	0	0	0	0	0	0	0	0	0	0	0	0	0	0	0
Sedoheptulose-1,7-phosphatase 1 y_rev	0	0	0	0	0	0	0	0	0	0	0	0	0	0	0	0	0	0	0	0	0	0	0	0	0	0	0	0	0	0	0	0	0	0	0	0	0	0	0	0	0	0	0	0	0	0	0	0	0
Sedoheptulose-1,7-phosphatase 2 y	0	0	0	0	0	0	0	0	0	0	0	0	0	0	0	0	0	0	0	0	0	0	0	0	0	0	0	0	0	0	0	0	0	0	0	0	0	0	0	0	0	0	0	0	0	0	0	0	0
Transketolase 1b y	0	0	0	0	0	0	0	0	0	0	0	0	0	0	0	0	0	0	0	0	0	0	0	0	0	0	0	0	0	0	0	0	0	0	0	0	0	0	0	0	0	0	0	0	0	0	0	0	0
Transketolase 1b y_rev	0	0	0	0	0	0	0	0	0	0	0	0	0	0	0	0	0	0	0	0	0	0	0	0	0	0	0	0	0	0	0	0	0	0	0	0	0	0	0	0	0	0	0	0	0	0	0	0	0
Transketolase 2b y	0	0	0	0	0	0	0	0	0	0	0	0	0	0	0	0	0	0	0	0	0	0	0	0	0	0	0	0	0	0	0	0	0	0	0	0	0	0	0	0	0	0	0	0	0	0	0	0	0
Transketolase 3b y	0	0	0	0	0	0	0	0	0	0	0	0	0	0	0	0	0	0	0	0	0	0	0	0	0	0	0	0	0	0	0	0	0	0	0	0	0	0	0	0	0	0	0	0	0	0	0	0	0
Transketolase 3b y_rev	0	0	0	0	0	0	0	0	0	0	0	0	0	0	0	0	0	0	0	0	0	0	0	0	0	0	0	0	0	0	0	0	0	0	0	0	0	0	0	0	0	0	0	0	0	0	0	0	0
Transketolase 4b y	0	0	0	0	0	0	0	0	0	0	0	0	0	0	0	0	0	0	0	0	0	0	0	0	0	0	0	0	0	0	0	0	0	0	0	0	0	0	0	0	0	0	0	0	0	0	0	0	0
Ribulose-5-phosphate epimerase 1 y	0	0	0	0	0	0	0	0	0	0	0	0	0	0	0	0	0	0	0	0	0	0	0	0	0	0	0	0	0	0	0	0	0	0	0	0	0	0	0	0	0	0	0	0	0	0	0	0	0
Ribulose-5-phosphate epimerase 1 y_rev	0	0	0	0	0	0	0	0	0	0	0	0	0	0	0	0	0	0	0	0	0	0	0	0	0	0	0	0	0	0	0	0	0	0	0	0	0	0	0	0	0	0	0	0	0	0	0	0	0
Ribulose-5-phosphate epimerase 2 y	0	0	0	0	0	0	0	0	0	0	0	0	0	0	0	0	0	0	0	0	0	0	0	0	0	0	0	0	0	0	0	0	0	0	0	0	0	0	0	0	0	0	0	0	0	0	0	0	0
Ribulose-5-phosphate epimerase 3 y	0	0	0	0	0	0	0	0	0	0	0	0	0	0	0	0	0	0	0	0	0	0	0	0	0	0	0	0	0	0	0	0	0	0	0	0	0	0	0	0	0	0	0	0	0	0	0	0	0
Ribulose-5-phosphate epimerase 3 y_rev	0	0	0	0	0	0	0	0	0	0	0	0	0	0	0	0	0	0	0	0	0	0	0	0	0	0	0	0	0	0	0	0	0	0	0	0	0	0	0	0	0	0	0	0	0	0	0	0	0
Ribulose-5-phosphate epimerase 4 y	0	0	0	0	0	0	0	0	0	0	0	0	0	0	0	0	0	0	0	0	0	0	0	0	0	0	0	0	0	0	0	0	0	0	0	0	0	0	0	0	0	0	0	0	0	0	0	0	0
Ribose-5-phosphate isomerase 1 y	0	0	0	0	0	0	0	0	0	0	0	0	0	0	0	0	0	0	0	0	0	0	0	0	0	0	0	0	0	0	0	0	0	0	0	0	0	0	0	0	0	0	0	0	0	0	0	0	0
Ribose-5-phosphate isomerase 1 y_rev	0	0	0	0	0	0	0	0	0	0	0	0	0	0	0	0	0	0	0	0	0	0	0	0	0	0	0	0	0	0	0	0	0	0	0	0	0	0	0	0	0	0	0	0	0	0	0	0	0
Ribose-5-phosphate isomerase 2 y	0	0	0	0	0	0	0	0	0	0	0	0	0	0	0	0	0	0	0	0	0	0	0	0	0	0	0	0	0	0	0	0	0	0	0	0	0	0	0	0	0	0	0	0	0	0	0	0	0
Ribose-5-phosphate isomerase 3 y	0	0	0	0	0	0	0	0	0	0	0	0	0	0	0	0	0	0	0	0	0	0	0	0	0	0	0	0	0	0	0	0	0	0	0	0	0	0	0	0	0	0	0	0	0	0	0	0	0
Ribose-5-phosphate isomerase 3 y_rev	0	0	0	0	0	0	0	0	0	0	0	0	0	0	0	0	0	0	0	0	0	0	0	0	0	0	0	0	0	0	0	0	0	0	0	0	0	0	0	0	0	0	0	0	0	0	0	0	0
Ribose-5-phosphate isomerase 4 y	0	0	0	0	0	0	0	0	0	0	0	0	0	0	0	0	0	0	0	0	0	0	0	0	0	0	0	0	0	0	0	0	0	0	0	0	0	0	0	0	0	0	0	0	0	0	0	0	0
Phosphoribulokinase 1 y	0	0	0	0	0	0	0	0	0	0	0	0	0	0	0	0	0	0	0	0	0	0	0	0	0	0	0	0	0	0	0	0	0	0	0	0	0	0	0	0	0	0	0	0	0	0	0	0	0
Phosphoribulokinase 1 y_rev	0	0	0	0	0	0	0	0	0	0	0	0	0	0	0	0	0	0	0	0	0	0	0	0	0	0	0	0	0	0	0	0	0	0	0	0	0	0	0	0	0	0	0	0	0	0	0	0	0
Phosphoribulokinase 2 y	0	0	0	0	0	0	0	0	0	0	0	0	0	0	0	0	0	0	0	0	0	0	0	0	0	0	0	0	0	0	0	0	0	0	0	0	0	0	0	0	0	0	0	0	0	0	0	0	0
Phosphoglucoisomerase 1 y	0	0	0	0	0	0	0	0	0	0	0	0	0	0	0	0	0	0	0	0	0	0	0	0	0	0	0	0	0	0	0	0	0	0	0	0	0	0	0	0	0	0	0	0	0	0	0	0	0
Phosphoglucoisomerase 1 y_rev	0	0	0	0	0	0	0	0	0	0	0	0	0	0	0	0	0	0	0	0	0	0	0	0	0	0	0	0	0	0	0	0	0	0	0	0	0	0	0	0	0	0	0	0	0	0	0	0	0
Phosphoglucoisomerase 2 y	0	0	0	0	0	0	0	0	0	0	0	0	0	0	0	0	0	0	0	0	0	0	0	0	0	0	0	0	0	0	0	0	0	0	0	0	0	0	0	0	0	0	0	0	0	0	0	0	0
Phosphoglucoisomerase 3 y	0	0	0	0	0	0	0	0	0	0	0	0	0	0	0	0	0	0	0	0	0	0	0	0	0	0	0	0	0	0	0	0	0	0	0	0	0	0	0	0	0	0	0	0	0	0	0	0	0
Phosphoglucoisomerase 3 y_rev	0	0	0	0	0	0	0	0	0	0	0	0	0	0	0	0	0	0	0	0	0	0	0	0	0	0	0	0	0	0	0	0	0	0	0	0	0	0	0	0	0	0	0	0	0	0	0	0	0
Phosphoglucoisomerase 4 y	0	0	0	0	0	0	0	0	0	0	0	0	0	0	0	0	0	0	0	0	0	0	0	0	0	0	0	0	0	0	0	0	0	0	0	0	0	0	0	0	0	0	0	0	0	0	0	0	0
Phosphoglucomutase 1 y	0	0	0	0	0	0	0	0	0	0	0	0	0	0	0	0	0	0	0	0	0	0	0	0	0	0	0	0	0	0	0	0	0	0	0	0	0	0	0	0	0	0	0	0	0	0	0	0	0
Phosphoglucomutase 1 y_rev	0	0	0	0	0	0	0	0	0	0	0	0	0	0	0	0	0	0	0	0	0	0	0	0	0	0	0	0	0	0	0	0	0	0	0	0	0	0	0	0	0	0	0	0	0	0	0	0	0
Phosphoglucomutase 2 y	0	0	0	0	0	0	0	0	0	0	0	0	0	0	0	0	0	0	0	0	0	0	0	0	0	0	0	0	0	0	0	0	0	0	0	0	0	0	0	0	0	0	0	0	0	0	0	0	0
Phosphoglucomutase 3 y	0	0	0	0	0	0	0	0	0	0	0	0	0	0	0	0	0	0	0	0	0	0	0	0	0	0	0	0	0	0	0	0	0	0	0	0	0	0	0	0	0	0	0	0	0	0	0	0	0
Phosphoglucomutase 3 y_rev	0	0	0	0	0	0	0	0	0	0	0	0	0	0	0	0	0	0	0	0	0	0	0	0	0	0	0	0	0	0	0	0	0	0	0	0	0	0	0	0	0	0	0	0	0	0	0	0	0
Phosphoglucomutase 4 y	0	0	0	0	0	0	0	0	0	0	0	0	0	0	0	0	0	0	0	0	0	0	0	0	0	0	0	0	0	0	0	0	0	0	0	0	0	0	0	0	0	0	0	0	0	0	0	0	0
Glucose-1-phosphate adenylyltransferase 1 y	0	0	0	0	0	0	0	0	0	0	0	0	0	0	0	0	0	0	0	0	0	0	0	0	0	0	0	0	0	0	0	0	0	0	0	0	0	0	0	0	0	0	0	0	0	0	0	0	0
Glucose-1-phosphate adenylyltransferase 1 y_rev	0	0	0	0	0	0	0	0	0	0	0	0	0	0	0	0	0	0	0	0	0	0	0	0	0	0	0	0	0	0	0	0	0	0	0	0	0	0	0	0	0	0	0	0	0	0	0	0	0
Glucose-1-phosphate adenylyltransferase 2 y	0	0	0	0	0	0	0	0	0	0	0	0	0	0	0	0	0	0	0	0	0	0	0	0	0	0	0	0	0	0	0	0	0	0	0	0	0	0	0	0	0	0	0	0	0	0	0	0	0
Glucose-1-phosphate adenylyltransferase 3 y	0	0	0	0	0	0	0	0	0	0	0	0	0	0	0	0	0	0	0	0	0	0	0	0	0	0	0	0	0	0	0	0	0	0	0	0	0	0	0	0	0	0	0	0	0	0	0	0	0
Glucose-1-phosphate adenylyltransferase 3 y_rev	0	0	0	0	0	0	0	0	0	0	0	0	0	0	0	0	0	0	0	0	0	0	0	0	0	0	0	0	0	0	0	0	0	0	0	0	0	0	0	0	0	0	0	0	0	0	0	0	0
Glucose-1-phosphate adenylyltransferase 4 y	0	0	0	0	0	0	0	0	0	0	0	0	0	0	0	0	0	0	0	0	0	0	0	0	0	0	0	0	0	0	0	0	0	0	0	0	0	0	0	0	0	0	0	0	0	0	0	0	0
ADPGstore y	0	0	0	0	0	0	0	0	0	0	0	0	0	0	0	0	0	0	0	0	0	0	0	0	0	0	0	0	0	0	0	0	0	0	0	0	0	0	0	0	0	0	0	0	0	0	0	0	0
ADPGstore y_rev	0	0	0	0	0	0	0	0	0	0	0	0	0	0	0	0	0	0	0	0	0	0	0	0	0	0	0	0	0	0	0	0	0	0	0	0	0	0	0	0	0	0	0	0	0	0	0	0	0
Diffusion RuBP	617.372	210.091	545.559	568.385	585.377	949.786	255.164	979.321	753.284	782.335	357.792	693.783	523.48	246.803	279.153	826.705	815.814	564.549	489.345	260.392	633.34	402.892	652.902	918.275	644.9	718.336	726.605	451.952	617.226	848.887	254.221	599.229	972.112	784.178	776.004	424.921	448.134	454.295	911.658	795.853	686.047	842.567	642.163	585.087	702.571	882.924	461.668	604.711	501.169
Diffusion RuBP_rev	371.252	210.093	299.474	322.241	339.237	703.647	9.04961	733.16	507.211	536.182	111.639	447.643	277.357	0.720734	33.0114	580.567	569.645	318.377	243.265	14.2599	387.257	156.743	406.769	672.199	398.811	472.229	480.508	205.834	371.153	602.714	8.13696	353.085	725.974	538.025	529.931	178.809	202.025	208.179	665.502	549.737	439.914	596.478	396.019	338.969	456.427	636.841	215.548	358.602	255.035
Diffusion 3PGA	249.698	146.017	363.927	139.646	95.5916	337.641	302.69	388.562	263.795	324.194	312.87	431.503	218.7	1.05185	128.785	154.343	118.07	31.8169	34.7117	190.304	223.164	98.2197	393.757	286.452	100.079	11.9675	38.2443	500.918	37.6313	378.735	12.7492	430.739	67.4803	187.357	199.874	431.276	370.766	503.933	196.523	127.253	348.728	326.887	5.15816	168.864	481.543	413.243	93.3155	336.076	276.198
Diffusion 3PGA_rev	741.938	146.021	856.096	631.934	587.87	829.92	794.918	880.884	755.941	816.5	805.176	923.782	710.945	493.217	621.068	646.619	610.409	524.161	526.873	682.569	715.331	590.518	886.023	778.605	592.256	504.182	530.439	993.155	529.777	871.079	504.917	923.028	559.756	679.664	692.018	923.5	862.984	996.166	688.833	619.485	840.994	819.064	497.446	661.099	973.831	905.411	585.554	828.294	768.464
Diffusion GAP	0	0	0	0	0	0	0	0	0	0	0	0	0	0	0	0	0	0	0	0	0	0	0	0	0	0	0	0	0	0	0	0	0	0	0	0	0	0	0	0	0	0	0	0	0	0	0	0	0
Diffusion GAP_rev	0	0	0	0	0	0	0	0	0	0	0	0	0	0	0	0	0	0	0	0	0	0	0	0	0	0	0	0	0	0	0	0	0	0	0	0	0	0	0	0	0	0	0	0	0	0	0	0	0
Diffusion DHAP	0	0	0	0	0	0	0	0	0	0	0	0	0	0	0	0	0	0	0	0	0	0	0	0	0	0	0	0	0	0	0	0	0	0	0	0	0	0	0	0	0	0	0	0	0	0	0	0	0
Diffusion DHAP_rev	0	0	0	0	0	0	0	0	0	0	0	0	0	0	0	0	0	0	0	0	0	0	0	0	0	0	0	0	0	0	0	0	0	0	0	0	0	0	0	0	0	0	0	0	0	0	0	0	0
Diffusion FBP	0	0	0	0	0	0	0	0	0	0	0	0	0	0	0	0	0	0	0	0	0	0	0	0	0	0	0	0	0	0	0	0	0	0	0	0	0	0	0	0	0	0	0	0	0	0	0	0	0
Diffusion FBP_rev	0	0	0	0	0	0	0	0	0	0	0	0	0	0	0	0	0	0	0	0	0	0	0	0	0	0	0	0	0	0	0	0	0	0	0	0	0	0	0	0	0	0	0	0	0	0	0	0	0
Diffusion F6P	0	0	0	0	0	0	0	0	0	0	0	0	0	0	0	0	0	0	0	0	0	0	0	0	0	0	0	0	0	0	0	0	0	0	0	0	0	0	0	0	0	0	0	0	0	0	0	0	0
Diffusion F6P_rev	0	0	0	0	0	0	0	0	0	0	0	0	0	0	0	0	0	0	0	0	0	0	0	0	0	0	0	0	0	0	0	0	0	0	0	0	0	0	0	0	0	0	0	0	0	0	0	0	0
Diffusion E4P	0	0	0	0	0	0	0	0	0	0	0	0	0	0	0	0	0	0	0	0	0	0	0	0	0	0	0	0	0	0	0	0	0	0	0	0	0	0	0	0	0	0	0	0	0	0	0	0	0
Diffusion E4P_rev	0	0	0	0	0	0	0	0	0	0	0	0	0	0	0	0	0	0	0	0	0	0	0	0	0	0	0	0	0	0	0	0	0	0	0	0	0	0	0	0	0	0	0	0	0	0	0	0	0
Diffusion Xu5P	0	0	0	0	0	0	0	0	0	0	0	0	0	0	0	0	0	0	0	0	0	0	0	0	0	0	0	0	0	0	0	0	0	0	0	0	0	0	0	0	0	0	0	0	0	0	0	0	0
Diffusion Xu5P_rev	0	0	0	0	0	0	0	0	0	0	0	0	0	0	0	0	0	0	0	0	0	0	0	0	0	0	0	0	0	0	0	0	0	0	0	0	0	0	0	0	0	0	0	0	0	0	0	0	0
Diffusion SBP	0	0	0	0	0	0	0	0	0	0	0	0	0	0	0	0	0	0	0	0	0	0	0	0	0	0	0	0	0	0	0	0	0	0	0	0	0	0	0	0	0	0	0	0	0	0	0	0	0
Diffusion SBP_rev	0	0	0	0	0	0	0	0	0	0	0	0	0	0	0	0	0	0	0	0	0	0	0	0	0	0	0	0	0	0	0	0	0	0	0	0	0	0	0	0	0	0	0	0	0	0	0	0	0
Diffusion S7P	0	0	0	0	0	0	0	0	0	0	0	0	0	0	0	0	0	0	0	0	0	0	0	0	0	0	0	0	0	0	0	0	0	0	0	0	0	0	0	0	0	0	0	0	0	0	0	0	0
Diffusion S7P_rev	0	0	0	0	0	0	0	0	0	0	0	0	0	0	0	0	0	0	0	0	0	0	0	0	0	0	0	0	0	0	0	0	0	0	0	0	0	0	0	0	0	0	0	0	0	0	0	0	0
Diffusion R5P	0	0	0	0	0	0	0	0	0	0	0	0	0	0	0	0	0	0	0	0	0	0	0	0	0	0	0	0	0	0	0	0	0	0	0	0	0	0	0	0	0	0	0	0	0	0	0	0	0
Diffusion R5P_rev	0	0	0	0	0	0	0	0	0	0	0	0	0	0	0	0	0	0	0	0	0	0	0	0	0	0	0	0	0	0	0	0	0	0	0	0	0	0	0	0	0	0	0	0	0	0	0	0	0
Diffusion Ru5P	0	0	0	0	0	0	0	0	0	0	0	0	0	0	0	0	0	0	0	0	0	0	0	0	0	0	0	0	0	0	0	0	0	0	0	0	0	0	0	0	0	0	0	0	0	0	0	0	0
Diffusion Ru5P_rev	0	0	0	0	0	0	0	0	0	0	0	0	0	0	0	0	0	0	0	0	0	0	0	0	0	0	0	0	0	0	0	0	0	0	0	0	0	0	0	0	0	0	0	0	0	0	0	0	0
Diffusion BPGA	0	0	0	0	0	0	0	0	0	0	0	0	0	0	0	0	0	0	0	0	0	0	0	0	0	0	0	0	0	0	0	0	0	0	0	0	0	0	0	0	0	0	0	0	0	0	0	0	0
Diffusion BPGA_rev	0	0	0	0	0	0	0	0	0	0	0	0	0	0	0	0	0	0	0	0	0	0	0	0	0	0	0	0	0	0	0	0	0	0	0	0	0	0	0	0	0	0	0	0	0	0	0	0	0
Diffusion G1P	0	0	0	0	0	0	0	0	0	0	0	0	0	0	0	0	0	0	0	0	0	0	0	0	0	0	0	0	0	0	0	0	0	0	0	0	0	0	0	0	0	0	0	0	0	0	0	0	0
Diffusion G1P_rev	0	0	0	0	0	0	0	0	0	0	0	0	0	0	0	0	0	0	0	0	0	0	0	0	0	0	0	0	0	0	0	0	0	0	0	0	0	0	0	0	0	0	0	0	0	0	0	0	0
Diffusion G6P	0	0	0	0	0	0	0	0	0	0	0	0	0	0	0	0	0	0	0	0	0	0	0	0	0	0	0	0	0	0	0	0	0	0	0	0	0	0	0	0	0	0	0	0	0	0	0	0	0
Diffusion G6P_rev	0	0	0	0	0	0	0	0	0	0	0	0	0	0	0	0	0	0	0	0	0	0	0	0	0	0	0	0	0	0	0	0	0	0	0	0	0	0	0	0	0	0	0	0	0	0	0	0	0
Diffusion ADPG	0	0	0	0	0	0	0	0	0	0	0	0	0	0	0	0	0	0	0	0	0	0	0	0	0	0	0	0	0	0	0	0	0	0	0	0	0	0	0	0	0	0	0	0	0	0	0	0	0
Diffusion ADPG_rev	0	0	0	0	0	0	0	0	0	0	0	0	0	0	0	0	0	0	0	0	0	0	0	0	0	0	0	0	0	0	0	0	0	0	0	0	0	0	0	0	0	0	0	0	0	0	0	0	0
FNR	796	0	796	796	796	796	796	796	796	796	796	796	796	796	796	796	796	796	796	796	796	796	796	796	796	796	796	796	796	796	796	796	796	796	796	796	796	796	796	796	796	796	796	796	796	796	796	796	796
ATPase	1194	0	1194	1194	1194	1194	1194	1194	1194	1194	1194	1194	1194	1194	1194	1194	1194	1194	1194	1194	1194	1194	1194	1194	1194	1194	1194	1194	1194	1194	1194	1194	1194	1194	1194	1194	1194	1194	1194	1194	1194	1194	1194	1194	1194	1194	1194	1194	1194
Diffusion ADP	0	0	0	0	0	0	0	0	0	0	0	0	0	0	0	0	0	0	0	0	0	0	0	0	0	0	0	0	0	0	0	0	0	0	0	0	0	0	0	0	0	0	0	0	0	0	0	0	0
Diffusion ADP_rev	0	0	0	0	0	0	0	0	0	0	0	0	0	0	0	0	0	0	0	0	0	0	0	0	0	0	0	0	0	0	0	0	0	0	0	0	0	0	0	0	0	0	0	0	0	0	0	0	0
Diffusion ATP	0	0	0	0	0	0	0	0	0	0	0	0	0	0	0	0	0	0	0	0	0	0	0	0	0	0	0	0	0	0	0	0	0	0	0	0	0	0	0	0	0	0	0	0	0	0	0	0	0
Diffusion ATP_rev	0	0	0	0	0	0	0	0	0	0	0	0	0	0	0	0	0	0	0	0	0	0	0	0	0	0	0	0	0	0	0	0	0	0	0	0	0	0	0	0	0	0	0	0	0	0	0	0	0
Diffusion NADP	0	0	0	0	0	0	0	0	0	0	0	0	0	0	0	0	0	0	0	0	0	0	0	0	0	0	0	0	0	0	0	0	0	0	0	0	0	0	0	0	0	0	0	0	0	0	0	0	0
Diffusion NADP_rev	0	0	0	0	0	0	0	0	0	0	0	0	0	0	0	0	0	0	0	0	0	0	0	0	0	0	0	0	0	0	0	0	0	0	0	0	0	0	0	0	0	0	0	0	0	0	0	0	0
Diffusion NADPH	0	0	0	0	0	0	0	0	0	0	0	0	0	0	0	0	0	0	0	0	0	0	0	0	0	0	0	0	0	0	0	0	0	0	0	0	0	0	0	0	0	0	0	0	0	0	0	0	0
Diffusion NADPH_rev	0	0	0	0	0	0	0	0	0	0	0	0	0	0	0	0	0	0	0	0	0	0	0	0	0	0	0	0	0	0	0	0	0	0	0	0	0	0	0	0	0	0	0	0	0	0	0	0	0
Diffusion DHAP s-c	468.221	266.328	461.962	887.531	80.8829	27.0088	577.977	79.2553	354.031	193.699	384.516	626.121	474.564	526.121	301.974	680.607	72.6346	358.265	32.4643	642.277	758.599	515.991	130.917	826.372	622.185	419.017	856.627	60.6573	448.288	643.89	300.643	486.942	413.825	940.128	487.798	659.276	755.292	440.017	790.568	48.7972	337.562	799.495	229.381	29.0935	766.93	384.424	133.981	279.146	428.358
Diffusion DHAP s-c_rev	557.604	260.064	981.408	792.351	172.031	130.23	446.17	36.3243	957.676	102.157	514.543	470.093	410.757	184.198	378.577	805.668	199.996	636.158	340.107	771.417	740.765	693.586	18.5553	527.814	925.101	608.451	866.658	269.484	238.259	434.721	167.311	731.45	559.721	919.736	571.537	683.015	959.323	406.911	993.158	339.361	240.543	603.319	198.949	382.921	733.593	870.433	34.2844	592.03	726.081
Diffusion BPGA s-c	476.9	268.217	626.931	685.676	52.6726	901.041	845.497	685.368	262.808	234.296	90.1355	876.762	624.504	637.574	819.316	120.203	773.177	669.353	876.446	686.673	890.016	94.2108	774.495	222.472	741.491	132.511	321.3	781.544	482.592	946.726	342.82	577.511	317.925	556.833	646.367	234.59	171.099	137.368	475.899	561.781	717.426	211.356	779.887	695.46	279.802	204.002	49.2751	190.087	386.446
Diffusion BPGA s-c_rev	525.2	268.649	924.262	653.141	150.461	859.968	907.724	666.118	392.398	245.246	72.39	972.194	570.119	649.711	830.495	265.721	807.352	725.76	970.227	733.17	832.737	238.318	875.46	264.209	698.539	179.062	322.805	899.374	623.34	912.837	225.582	801.795	408.081	555.138	528.262	292.866	368.111	52.8786	520.635	528.625	776.21	208.82	809.066	634.195	260.731	176.816	57.8743	96.1756	360.441
Diffusion GAP s-c	552.567	263.341	812.284	229.246	172.271	473.374	412.152	171.437	687.223	263.266	494.162	188.261	570.461	440.438	653.418	21.3656	325.104	753.227	276.711	184.077	315.831	850.09	547.739	433.692	858.454	528.723	959.946	796.715	173.572	261.007	986.095	719.566	253.391	199.429	753.473	279.815	885.99	451.574	616.241	936.947	917.014	629.681	383.514	975.892	531.197	728.334	855.792	876.707	730.916
Diffusion GAP s-c_rev	427.117	256.733	754.831	126.691	144.034	155.34	535.747	43.2018	210.091	244.042	195.977	402.487	392.831	673.97	466.506	54.6719	133.427	455.481	23.9639	15.2644	86.4399	828.043	729.364	683.059	336.966	299.725	820.258	690.882	532.43	269.731	752.285	790.959	155.141	83.7656	300.858	239.961	943.317	183.036	370.456	447.405	998.935	688.117	339.637	366.869	393.725	55.2874	840.021	243.334	248.515
Diffusion 3PGA s-c	524.423	270.565	617.332	828.58	171.147	30.4502	271.17	125.329	361.364	845.525	548.901	793.491	657.251	923.257	424.482	910.893	157.437	495.849	833.367	138.546	800.017	490.396	697.451	443.742	553.468	971.209	17.2715	419.978	535.758	560.165	671.199	669.354	823.393	345.923	208.482	460.382	497.732	144.652	207.837	477.153	446.318	193.259	471.674	907.029	87.9756	535.68	512.367	343.485	826.758
Diffusion 3PGA s-c_rev	476.123	267.884	320.002	861.114	73.3582	71.5232	208.942	144.578	231.775	834.575	566.646	698.059	711.636	911.12	413.303	765.376	123.262	439.442	739.585	92.0485	857.296	346.289	596.486	402.004	596.42	924.659	15.7665	302.148	395.01	594.054	788.437	445.07	733.237	347.617	326.587	402.106	300.719	229.141	163.101	510.309	387.533	195.796	442.495	968.293	107.047	562.866	503.768	437.397	852.763
[truncated: 953 more columns]

## Sheet: D_net flux
Supplementary Table 6D. Net flux through model reactions in µM/s for the 1,000 sampled flux distributions (see Supplementary Table 5C).
reaction	average	standard deviation	SAMPLE 1	SAMPLE 2	SAMPLE 3	SAMPLE 4	SAMPLE 5	SAMPLE 6	SAMPLE 7	SAMPLE 8	SAMPLE 9	SAMPLE 10	SAMPLE 11	SAMPLE 12	SAMPLE 13	SAMPLE 14	SAMPLE 15	SAMPLE 16	SAMPLE 17	SAMPLE 18	SAMPLE 19	SAMPLE 20	SAMPLE 21	SAMPLE 22	SAMPLE 23	SAMPLE 24	SAMPLE 25	SAMPLE 26	SAMPLE 27	SAMPLE 28	SAMPLE 29	SAMPLE 30	SAMPLE 31	SAMPLE 32	SAMPLE 33	SAMPLE 34	SAMPLE 35	SAMPLE 36	SAMPLE 37	SAMPLE 38	SAMPLE 39	SAMPLE 40	SAMPLE 41	SAMPLE 42	SAMPLE 43	SAMPLE 44	SAMPLE 45	SAMPLE 46	SAMPLE 47
Diffusion CO2 c-s	398	0	398	398	398	398	398	398	398	398	398	398	398	398	398	398	398	398	398	398	398	398	398	398	398	398	398	398	398	398	398	398	398	398	398	398	398	398	398	398	398	398	398	398	398	398	398	398	398
Diffusion CO2 s-y	246.12	0.0292499	246.085	246.144	246.139	246.139	246.114	246.161	246.073	246.153	246.153	246.139	246.123	246.083	246.142	246.138	246.17	246.172	246.081	246.132	246.084	246.149	246.133	246.076	246.089	246.107	246.097	246.119	246.073	246.172	246.084	246.144	246.138	246.153	246.072	246.112	246.109	246.116	246.155	246.116	246.133	246.089	246.144	246.118	246.144	246.084	246.119	246.109	246.133
Rubisco carboxylase 2 s	151.88	0.0292499	151.915	151.856	151.861	151.861	151.886	151.839	151.927	151.847	151.847	151.861	151.877	151.917	151.858	151.862	151.83	151.828	151.919	151.868	151.916	151.851	151.867	151.924	151.911	151.893	151.903	151.881	151.927	151.828	151.916	151.856	151.862	151.847	151.928	151.888	151.891	151.884	151.845	151.884	151.867	151.911	151.856	151.882	151.856	151.916	151.881	151.891	151.867
Phosphoglycerate kinase 2 s	747.7	90.8324	498.669	828.534	698.211	837.073	733.773	815.25	666.41	785.05	813.745	700.568	850.385	783.862	784.821	650.483	761.825	739.593	702.219	749.503	853.279	651.893	695.035	754.263	838.953	749.449	794.495	678.17	655.252	829.889	913.238	571.716	705.844	797.695	914.105	737.724	598.988	880.489	751.264	829.156	737.216	798.537	766.821	857.265	815.071	823.185	787.401	889.911	822.005
Glyceraldehyde-3-phosphate dehydrogenase 2 s	796	8.56989e-11	796	796	796	796	796	796	796	796	796	796	796	796	796	796	796	796	796	796	796	796	796	796	796	796	796	796	796	796	796	796	796	796	796	796	796	796	796	796	796	796	796	796	796	796	796	796	796
Triosephosphate isomerase 2 s	224.25	217.806	43.2172	327.979	271.974	121.039	459.368	289.015	-208.721	367.826	117.561	516.794	274.755	619.394	199.909	285.789	172.147	43.8469	51.4719	182.69	225.888	231.846	478.66	605.629	-80.5357	122.45	256.807	174.337	616.11	440.613	281.427	245.109	209.594	284.031	63.4895	299.87	258.315	213.951	107.479	-58.3864	421.136	458.973	324.944	-149.759	279.6	-247.861	373.629	-141.462	-58.3951
Aldolase 2a s	180.967	90.8324	429.997	100.133	230.455	91.5937	194.894	113.417	262.257	143.617	114.921	228.099	78.2814	144.804	143.845	278.184	166.842	189.073	226.448	179.164	75.3877	276.774	233.632	174.404	89.7141	179.217	134.172	250.497	273.415	98.7777	15.4291	356.951	222.822	130.972	14.5617	190.943	329.679	48.1777	177.403	99.5111	191.451	130.13	161.845	71.402	113.595	105.481	141.266	38.7553	106.662
Fructose-1,6-bisphosphatase 2 s	180.967	90.8324	429.997	100.133	230.455	91.5937	194.894	113.417	262.257	143.617	114.921	228.099	78.2814	144.804	143.845	278.184	166.842	189.073	226.448	179.164	75.3877	276.774	233.632	174.404	89.7141	179.217	134.172	250.497	273.415	98.7777	15.4291	356.951	222.822	130.972	14.5617	190.943	329.679	48.1777	177.403	99.5111	191.451	130.13	161.845	71.402	113.595	105.481	141.266	38.7553	106.662
Transketolase 2a s	132.667	5.70648e-11	132.667	132.667	132.667	132.667	132.667	132.667	132.667	132.667	132.667	132.667	132.667	132.667	132.667	132.667	132.667	132.667	132.667	132.667	132.667	132.667	132.667	132.667	132.667	132.667	132.667	132.667	132.667	132.667	132.667	132.667	132.667	132.667	132.667	132.667	132.667	132.667	132.667	132.667	132.667	132.667	132.667	132.667	132.667	132.667	132.667	132.667	132.667
Aldolase 2b s	132.667	5.90503e-11	132.667	132.667	132.667	132.667	132.667	132.667	132.667	132.667	132.667	132.667	132.667	132.667	132.667	132.667	132.667	132.667	132.667	132.667	132.667	132.667	132.667	132.667	132.667	132.667	132.667	132.667	132.667	132.667	132.667	132.667	132.667	132.667	132.667	132.667	132.667	132.667	132.667	132.667	132.667	132.667	132.667	132.667	132.667	132.667	132.667	132.667	132.667
Sedoheptulose-1,7-phosphatase 2 s	132.667	1.59241e-12	132.667	132.667	132.667	132.667	132.667	132.667	132.667	132.667	132.667	132.667	132.667	132.667	132.667	132.667	132.667	132.667	132.667	132.667	132.667	132.667	132.667	132.667	132.667	132.667	132.667	132.667	132.667	132.667	132.667	132.667	132.667	132.667	132.667	132.667	132.667	132.667	132.667	132.667	132.667	132.667	132.667	132.667	132.667	132.667	132.667	132.667	132.667
Transketolase 2b s	132.667	5.82068e-11	132.667	132.667	132.667	132.667	132.667	132.667	132.667	132.667	132.667	132.667	132.667	132.667	132.667	132.667	132.667	132.667	132.667	132.667	132.667	132.667	132.667	132.667	132.667	132.667	132.667	132.667	132.667	132.667	132.667	132.667	132.667	132.667	132.667	132.667	132.667	132.667	132.667	132.667	132.667	132.667	132.667	132.667	132.667	132.667	132.667	132.667	132.667
Ribulose-5-phosphate epimerase 2 s	265.333	5.88233e-11	265.333	265.333	265.333	265.333	265.333	265.333	265.333	265.333	265.333	265.333	265.333	265.333	265.333	265.333	265.333	265.333	265.333	265.333	265.333	265.333	265.333	265.333	265.333	265.333	265.333	265.333	265.333	265.333	265.333	265.333	265.333	265.333	265.333	265.333	265.333	265.333	265.333	265.333	265.333	265.333	265.333	265.333	265.333	265.333	265.333	265.333	265.333
Ribose-5-phosphate isomerase 2 s	132.667	7.7871e-11	132.667	132.667	132.667	132.667	132.667	132.667	132.667	132.667	132.667	132.667	132.667	132.667	132.667	132.667	132.667	132.667	132.667	132.667	132.667	132.667	132.667	132.667	132.667	132.667	132.667	132.667	132.667	132.667	132.667	132.667	132.667	132.667	132.667	132.667	132.667	132.667	132.667	132.667	132.667	132.667	132.667	132.667	132.667	132.667	132.667	132.667	132.667
Phosphoribulokinase 2 s	398	0	398	398	398	398	398	398	398	398	398	398	398	398	398	398	398	398	398	398	398	398	398	398	398	398	398	398	398	398	398	398	398	398	398	398	398	398	398	398	398	398	398	398	398	398	398	398	398
Phosphoglucoisomerase 2 s	48.3	90.8324	297.331	-32.5341	97.7888	-41.073	62.2273	-19.2496	129.59	10.9504	-17.7455	95.4322	-54.3852	12.1377	11.1788	145.517	34.1754	56.4067	93.7812	46.4972	-57.279	144.107	100.965	41.7375	-42.9526	46.5508	1.50496	117.83	140.748	-33.889	-117.238	224.284	90.1557	-1.69453	-118.105	58.2763	197.012	-84.489	44.7361	-33.1556	58.7844	-2.53671	29.1786	-61.2646	-19.0713	-27.1854	8.59919	-93.9114	-26.0051
Phosphoglucomutase 2 s	48.3	90.8324	297.331	-32.5341	97.7888	-41.073	62.2273	-19.2496	129.59	10.9504	-17.7455	95.4322	-54.3852	12.1377	11.1788	145.517	34.1754	56.4067	93.7812	46.4972	-57.279	144.107	100.965	41.7375	-42.9526	46.5508	1.50496	117.83	140.748	-33.889	-117.238	224.284	90.1557	-1.69453	-118.105	58.2763	197.012	-84.489	44.7361	-33.1556	58.7844	-2.53671	29.1786	-61.2646	-19.0713	-27.1854	8.59919	-93.9114	-26.0051
Glucose-1-phosphate adenylyltransferase 2 s	48.3	90.8324	297.331	-32.5341	97.7888	-41.073	62.2273	-19.2496	129.59	10.9504	-17.7455	95.4322	-54.3852	12.1377	11.1788	145.517	34.1754	56.4067	93.7812	46.4972	-57.279	144.107	100.965	41.7375	-42.9526	46.5508	1.50496	117.83	140.748	-33.889	-117.238	224.284	90.1557	-1.69453	-118.105	58.2763	197.012	-84.489	44.7361	-33.1556	58.7844	-2.53671	29.1786	-61.2646	-19.0713	-27.1854	8.59919	-93.9114	-26.0051
ADPGstore s	48.3	90.8324	297.331	-32.5341	97.7888	-41.073	62.2273	-19.2496	129.59	10.9504	-17.7455	95.4322	-54.3852	12.1377	11.1788	145.517	34.1754	56.4067	93.7812	46.4972	-57.279	144.107	100.965	41.7375	-42.9526	46.5508	1.50496	117.83	140.748	-33.889	-117.238	224.284	90.1557	-1.69453	-118.105	58.2763	197.012	-84.489	44.7361	-33.1556	58.7844	-2.53671	29.1786	-61.2646	-19.0713	-27.1854	8.59919	-93.9114	-26.0051
Rubisco carboxylase 2 y	246.12	0.0292499	246.085	246.144	246.139	246.139	246.114	246.161	246.073	246.153	246.153	246.139	246.123	246.083	246.142	246.138	246.17	246.172	246.081	246.132	246.084	246.149	246.133	246.076	246.089	246.107	246.097	246.119	246.073	246.172	246.084	246.144	246.138	246.153	246.072	246.112	246.109	246.116	246.155	246.116	246.133	246.089	246.144	246.118	246.144	246.084	246.119	246.109	246.133
Phosphoglycerate kinase 2 y	0	0	0	0	0	0	0	0	0	0	0	0	0	0	0	0	0	0	0	0	0	0	0	0	0	0	0	0	0	0	0	0	0	0	0	0	0	0	0	0	0	0	0	0	0	0	0	0	0
Glyceraldehyde-3-phosphate dehydrogenase 2 y	0	0	0	0	0	0	0	0	0	0	0	0	0	0	0	0	0	0	0	0	0	0	0	0	0	0	0	0	0	0	0	0	0	0	0	0	0	0	0	0	0	0	0	0	0	0	0	0	0
Triosephosphate isomerase 2 y	0	0	0	0	0	0	0	0	0	0	0	0	0	0	0	0	0	0	0	0	0	0	0	0	0	0	0	0	0	0	0	0	0	0	0	0	0	0	0	0	0	0	0	0	0	0	0	0	0
Aldolase 2a y	0	0	0	0	0	0	0	0	0	0	0	0	0	0	0	0	0	0	0	0	0	0	0	0	0	0	0	0	0	0	0	0	0	0	0	0	0	0	0	0	0	0	0	0	0	0	0	0	0
Fructose-1,6-bisphosphatase 2 y	0	0	0	0	0	0	0	0	0	0	0	0	0	0	0	0	0	0	0	0	0	0	0	0	0	0	0	0	0	0	0	0	0	0	0	0	0	0	0	0	0	0	0	0	0	0	0	0	0
Transketolase 2a y	0	0	0	0	0	0	0	0	0	0	0	0	0	0	0	0	0	0	0	0	0	0	0	0	0	0	0	0	0	0	0	0	0	0	0	0	0	0	0	0	0	0	0	0	0	0	0	0	0
Aldolase 2b y	0	0	0	0	0	0	0	0	0	0	0	0	0	0	0	0	0	0	0	0	0	0	0	0	0	0	0	0	0	0	0	0	0	0	0	0	0	0	0	0	0	0	0	0	0	0	0	0	0
Sedoheptulose-1,7-phosphatase 2 y	0	0	0	0	0	0	0	0	0	0	0	0	0	0	0	0	0	0	0	0	0	0	0	0	0	0	0	0	0	0	0	0	0	0	0	0	0	0	0	0	0	0	0	0	0	0	0	0	0
Transketolase 2b y	0	0	0	0	0	0	0	0	0	0	0	0	0	0	0	0	0	0	0	0	0	0	0	0	0	0	0	0	0	0	0	0	0	0	0	0	0	0	0	0	0	0	0	0	0	0	0	0	0
Ribulose-5-phosphate epimerase 2 y	0	0	0	0	0	0	0	0	0	0	0	0	0	0	0	0	0	0	0	0	0	0	0	0	0	0	0	0	0	0	0	0	0	0	0	0	0	0	0	0	0	0	0	0	0	0	0	0	0
Ribose-5-phosphate isomerase 2 y	0	0	0	0	0	0	0	0	0	0	0	0	0	0	0	0	0	0	0	0	0	0	0	0	0	0	0	0	0	0	0	0	0	0	0	0	0	0	0	0	0	0	0	0	0	0	0	0	0
Phosphoribulokinase 2 y	0	0	0	0	0	0	0	0	0	0	0	0	0	0	0	0	0	0	0	0	0	0	0	0	0	0	0	0	0	0	0	0	0	0	0	0	0	0	0	0	0	0	0	0	0	0	0	0	0
Phosphoglucoisomerase 2 y	0	0	0	0	0	0	0	0	0	0	0	0	0	0	0	0	0	0	0	0	0	0	0	0	0	0	0	0	0	0	0	0	0	0	0	0	0	0	0	0	0	0	0	0	0	0	0	0	0
Phosphoglucomutase 2 y	0	0	0	0	0	0	0	0	0	0	0	0	0	0	0	0	0	0	0	0	0	0	0	0	0	0	0	0	0	0	0	0	0	0	0	0	0	0	0	0	0	0	0	0	0	0	0	0	0
Glucose-1-phosphate adenylyltransferase 2 y	0	0	0	0	0	0	0	0	0	0	0	0	0	0	0	0	0	0	0	0	0	0	0	0	0	0	0	0	0	0	0	0	0	0	0	0	0	0	0	0	0	0	0	0	0	0	0	0	0
ADPGstore y	0	0	0	0	0	0	0	0	0	0	0	0	0	0	0	0	0	0	0	0	0	0	0	0	0	0	0	0	0	0	0	0	0	0	0	0	0	0	0	0	0	0	0	0	0	0	0	0	0
Diffusion RuBP	246.12	0.0292499	246.085	246.144	246.139	246.139	246.114	246.161	246.073	246.153	246.153	246.139	246.123	246.083	246.142	246.138	246.17	246.172	246.081	246.132	246.084	246.149	246.133	246.076	246.089	246.107	246.097	246.119	246.073	246.172	246.084	246.144	246.138	246.153	246.072	246.112	246.109	246.116	246.155	246.116	246.133	246.089	246.144	246.118	246.144	246.084	246.119	246.109	246.133
Diffusion 3PGA	-492.24	0.0584999	-492.17	-492.288	-492.279	-492.279	-492.228	-492.322	-492.147	-492.306	-492.306	-492.279	-492.245	-492.165	-492.283	-492.276	-492.339	-492.344	-492.161	-492.265	-492.167	-492.298	-492.266	-492.153	-492.177	-492.215	-492.194	-492.237	-492.145	-492.344	-492.168	-492.288	-492.276	-492.306	-492.145	-492.224	-492.218	-492.232	-492.31	-492.232	-492.266	-492.177	-492.288	-492.236	-492.288	-492.168	-492.239	-492.219	-492.266
Diffusion GAP	0	0	0	0	0	0	0	0	0	0	0	0	0	0	0	0	0	0	0	0	0	0	0	0	0	0	0	0	0	0	0	0	0	0	0	0	0	0	0	0	0	0	0	0	0	0	0	0	0
Diffusion DHAP	0	0	0	0	0	0	0	0	0	0	0	0	0	0	0	0	0	0	0	0	0	0	0	0	0	0	0	0	0	0	0	0	0	0	0	0	0	0	0	0	0	0	0	0	0	0	0	0	0
Diffusion FBP	0	0	0	0	0	0	0	0	0	0	0	0	0	0	0	0	0	0	0	0	0	0	0	0	0	0	0	0	0	0	0	0	0	0	0	0	0	0	0	0	0	0	0	0	0	0	0	0	0
Diffusion F6P	0	0	0	0	0	0	0	0	0	0	0	0	0	0	0	0	0	0	0	0	0	0	0	0	0	0	0	0	0	0	0	0	0	0	0	0	0	0	0	0	0	0	0	0	0	0	0	0	0
Diffusion E4P	0	0	0	0	0	0	0	0	0	0	0	0	0	0	0	0	0	0	0	0	0	0	0	0	0	0	0	0	0	0	0	0	0	0	0	0	0	0	0	0	0	0	0	0	0	0	0	0	0
Diffusion Xu5P	0	0	0	0	0	0	0	0	0	0	0	0	0	0	0	0	0	0	0	0	0	0	0	0	0	0	0	0	0	0	0	0	0	0	0	0	0	0	0	0	0	0	0	0	0	0	0	0	0
Diffusion SBP	0	0	0	0	0	0	0	0	0	0	0	0	0	0	0	0	0	0	0	0	0	0	0	0	0	0	0	0	0	0	0	0	0	0	0	0	0	0	0	0	0	0	0	0	0	0	0	0	0
Diffusion S7P	0	0	0	0	0	0	0	0	0	0	0	0	0	0	0	0	0	0	0	0	0	0	0	0	0	0	0	0	0	0	0	0	0	0	0	0	0	0	0	0	0	0	0	0	0	0	0	0	0
Diffusion R5P	0	0	0	0	0	0	0	0	0	0	0	0	0	0	0	0	0	0	0	0	0	0	0	0	0	0	0	0	0	0	0	0	0	0	0	0	0	0	0	0	0	0	0	0	0	0	0	0	0
Diffusion Ru5P	0	0	0	0	0	0	0	0	0	0	0	0	0	0	0	0	0	0	0	0	0	0	0	0	0	0	0	0	0	0	0	0	0	0	0	0	0	0	0	0	0	0	0	0	0	0	0	0	0
Diffusion BPGA	0	0	0	0	0	0	0	0	0	0	0	0	0	0	0	0	0	0	0	0	0	0	0	0	0	0	0	0	0	0	0	0	0	0	0	0	0	0	0	0	0	0	0	0	0	0	0	0	0
Diffusion G1P	0	0	0	0	0	0	0	0	0	0	0	0	0	0	0	0	0	0	0	0	0	0	0	0	0	0	0	0	0	0	0	0	0	0	0	0	0	0	0	0	0	0	0	0	0	0	0	0	0
Diffusion G6P	0	0	0	0	0	0	0	0	0	0	0	0	0	0	0	0	0	0	0	0	0	0	0	0	0	0	0	0	0	0	0	0	0	0	0	0	0	0	0	0	0	0	0	0	0	0	0	0	0
Diffusion ADPG	0	0	0	0	0	0	0	0	0	0	0	0	0	0	0	0	0	0	0	0	0	0	0	0	0	0	0	0	0	0	0	0	0	0	0	0	0	0	0	0	0	0	0	0	0	0	0	0	0
FNR	796	0	796	796	796	796	796	796	796	796	796	796	796	796	796	796	796	796	796	796	796	796	796	796	796	796	796	796	796	796	796	796	796	796	796	796	796	796	796	796	796	796	796	796	796	796	796	796	796
ATPase	1194	0	1194	1194	1194	1194	1194	1194	1194	1194	1194	1194	1194	1194	1194	1194	1194	1194	1194	1194	1194	1194	1194	1194	1194	1194	1194	1194	1194	1194	1194	1194	1194	1194	1194	1194	1194	1194	1194	1194	1194	1194	1194	1194	1194	1194	1194	1194	1194
Diffusion ADP	0	0	0	0	0	0	0	0	0	0	0	0	0	0	0	0	0	0	0	0	0	0	0	0	0	0	0	0	0	0	0	0	0	0	0	0	0	0	0	0	0	0	0	0	0	0	0	0	0
Diffusion ATP	0	0	0	0	0	0	0	0	0	0	0	0	0	0	0	0	0	0	0	0	0	0	0	0	0	0	0	0	0	0	0	0	0	0	0	0	0	0	0	0	0	0	0	0	0	0	0	0	0
Diffusion NADP	0	0	0	0	0	0	0	0	0	0	0	0	0	0	0	0	0	0	0	0	0	0	0	0	0	0	0	0	0	0	0	0	0	0	0	0	0	0	0	0	0	0	0	0	0	0	0	0	0
Diffusion NADPH	0	0	0	0	0	0	0	0	0	0	0	0	0	0	0	0	0	0	0	0	0	0	0	0	0	0	0	0	0	0	0	0	0	0	0	0	0	0	0	0	0	0	0	0	0	0	0	0	0
Diffusion DHAP s-c	-89.3835	231.847	-519.447	95.18	-91.148	-103.221	131.807	42.931	-603.644	91.5418	-130.027	156.028	63.8068	341.923	-76.6029	-125.062	-127.361	-277.893	-307.643	-129.14	17.8339	-177.595	112.361	298.558	-302.916	-189.434	-10.031	-208.826	210.029	209.169	133.332	-244.508	-145.895	20.3919	-83.7388	-23.7396	-204.031	33.1066	-202.59	-290.564	97.0186	196.176	30.4321	-353.827	33.3378	-486.009	99.6966	-312.884	-297.723
Diffusion BPGA s-c	-48.3	90.8324	-297.331	32.5341	-97.7888	41.073	-62.2273	19.2496	-129.59	-10.9504	17.7455	-95.4322	54.3852	-12.1377	-11.1788	-145.517	-34.1754	-56.4067	-93.7812	-46.4972	57.279	-144.107	-100.965	-41.7375	42.9526	-46.5508	-1.50496	-117.83	-140.748	33.889	117.238	-224.284	-90.1557	1.69453	118.105	-58.2763	-197.012	84.489	-44.7361	33.1556	-58.7844	2.53671	-29.1786	61.2646	19.0713	27.1854	-8.59919	93.9114	26.0051
Diffusion GAP s-c	125.45	240.057	57.4522	102.555	28.2372	318.034	-123.595	128.235	477.131	19.2241	298.185	-214.226	177.63	-233.531	186.912	-33.3063	191.677	297.746	252.747	168.813	229.391	22.0472	-181.625	-249.367	521.488	228.999	139.688	105.832	-358.858	-8.72428	233.81	-71.3932	98.2505	115.664	452.615	39.8536	-57.3274	268.538	245.785	489.542	-81.9208	-58.4361	43.8774	609.023	137.472	673.047	15.7717	633.374	482.4
Diffusion 3PGA s-c	48.3	90.8324	297.331	-32.5341	97.7888	-41.073	62.2273	-19.2496	129.59	10.9504	-17.7455	95.4322	-54.3852	12.1377	11.1788	145.517	34.1754	56.4067	93.7812	46.4972	-57.279	144.107	100.965	41.7375	-42.9526	46.5508	1.50496	117.83	140.748	-33.889	-117.238	224.284	90.1557	-1.69453	-118.105	58.2763	197.012	-84.489	44.7361	-33.1556	58.7844	-2.53671	29.1786	-61.2646	-19.0713	-27.1854	8.59919	-93.9114	-26.0051
Ratio flux RuBP / free RuBP	3986.57	2.83994
Ratio flux 3PGA / free 3PGA	-0.903129	2.83994
[truncated: 953 more columns]

## Sheet: E_rate constants
Supplementary Table 6E. Reaction rate constants for 1,000 samples. For further information on reaction names see Supplementary file 3.
reaction	average	standard deviation	unit	SAMPLE 1	SAMPLE 2	SAMPLE 3	SAMPLE 4	SAMPLE 5	SAMPLE 6	SAMPLE 7	SAMPLE 8	SAMPLE 9	SAMPLE 10	SAMPLE 11	SAMPLE 12	SAMPLE 13	SAMPLE 14	SAMPLE 15	SAMPLE 16	SAMPLE 17	SAMPLE 18	SAMPLE 19	SAMPLE 20	SAMPLE 21	SAMPLE 22	SAMPLE 23	SAMPLE 24	SAMPLE 25	SAMPLE 26	SAMPLE 27	SAMPLE 28	SAMPLE 29	SAMPLE 30	SAMPLE 31	SAMPLE 32	SAMPLE 33	SAMPLE 34	SAMPLE 35	SAMPLE 36	SAMPLE 37	SAMPLE 38	SAMPLE 39	SAMPLE 40	SAMPLE 41	SAMPLE 42	SAMPLE 43	SAMPLE 44	SAMPLE 45	SAMPLE 46
Diffusion CO2 c-s	398	0	µmol·L−1·s−1	398	398	398	398	398	398	398	398	398	398	398	398	398	398	398	398	398	398	398	398	398	398	398	398	398	398	398	398	398	398	398	398	398	398	398	398	398	398	398	398	398	398	398	398	398	398
Diffusion CO2 c-s_rev	0	0	s−1	0	0	0	0	0	0	0	0	0	0	0	0	0	0	0	0	0	0	0	0	0	0	0	0	0	0	0	0	0	0	0	0	0	0	0	0	0	0	0	0	0	0	0	0	0	0
Diffusion CO2 s-y	10000	0	s−1	10000	10000	10000	10000	10000	10000	10000	10000	10000	10000	10000	10000	10000	10000	10000	10000	10000	10000	10000	10000	10000	10000	10000	10000	10000	10000	10000	10000	10000	10000	10000	10000	10000	10000	10000	10000	10000	10000	10000	10000	10000	10000	10000	10000	10000	10000
Diffusion CO2 s-y_rev	9377.03	1946.58	s−1	9571.19	10000	10000	10000	10000	10000	10000	10000	10000	10000	8473.42	10000	10000	10000	10000	10000	10000	10000	10000	10000	10000	10000	10000	10000	10000	10000	4692.19	10000	10000	10000	10000	10000	10000	68.7619	2676.36	10000	10000	10000	10000	10000	10000	10000	10000	10000	10000	10000
Rubisco carboxylase 1 s	10000	0	L2·mol−2·s−1	10000	10000	10000	10000	10000	10000	10000	10000	10000	10000	10000	10000	10000	10000	10000	10000	10000	10000	10000	10000	10000	10000	10000	10000	10000	10000	10000	10000	10000	10000	10000	10000	10000	10000	10000	10000	10000	10000	10000	10000	10000	10000	10000	10000	10000	10000
Rubisco carboxylase 1 s_rev	8.60121	5.13303	s−1	11.1127	2.69786	17.4039	13.0908	16.9892	14.7961	10.4635	9.40669	10.7732	15.0988	11.1551	14.0709	7.71956	14.587	15.3644	8.81933	16.4553	3.80036	6.30823	0.742694	9.68633	16.3453	7.91289	15.2134	9.08064	0.441623	0.903328	5.39636	4.4015	5.18716	12.2385	3.40113	8.36303	15.0953	15.6187	12.6412	0.198347	5.2346	3.75938	8.06443	17.2361	3.34301	0.85273	11.5144	10.1575	8.26568
Rubisco carboxylase 2 s	5.8	1.06635e-13	s−1	5.8	5.8	5.8	5.8	5.8	5.8	5.8	5.8	5.8	5.8	5.8	5.8	5.8	5.8	5.8	5.8	5.8	5.8	5.8	5.8	5.8	5.8	5.8	5.8	5.8	5.8	5.8	5.8	5.8	5.8	5.8	5.8	5.8	5.8	5.8	5.8	5.8	5.8	5.8	5.8	5.8	5.8	5.8	5.8	5.8	5.8
Phosphoglycerate kinase 1 s	2718.27	1694.96	L2·mol−2·s−1	1865.69	1746.3	5027.09	10000	2097.19	10000	1810.56	2380.45	7799.48	5096.24	2416.61	3588.41	1886.96	2029.47	5048.44	4272.05	2416.37	1698.21	2845.01	2664.54	2279.92	5019.41	1848.24	1817.86	4029.51	3012.46	1859.53	1916.25	3025.99	1762.49	2986.06	2971.66	1657.52	2545.47	3203.38	3487.14	10000	1510.39	1754.9	6540.14	1553.86	5063.55	1888	2284.75	1499.04	1607.48
Phosphoglycerate kinase 1 s_rev	10.1857	10.0477	s−1	51.4966	11.0053	24.6913	2.22488	18.8195	4.59167	1.894	17.1859	12.3807	15.3775	2.38546	14.0029	10.4101	28.4461	17.6096	23.2773	25.8084	7.04246	2.64648	33.6671	19.3264	11.0533	6.35054	9.56603	3.61812	16.6964	6.25161	2.50408	3.84974	49.1546	16.3807	4.51705	6.47603	13.895	25.5441	6.79457	3.35123	12.1679	18.9642	0.624794	9.03279	7.53859	1.04244	15.1374	12.0598	6.29344
Phosphoglycerate kinase 2 s	84.7	1.59241e-12	s−1	84.7	84.7	84.7	84.7	84.7	84.7	84.7	84.7	84.7	84.7	84.7	84.7	84.7	84.7	84.7	84.7	84.7	84.7	84.7	84.7	84.7	84.7	84.7	84.7	84.7	84.7	84.7	84.7	84.7	84.7	84.7	84.7	84.7	84.7	84.7	84.7	84.7	84.7	84.7	84.7	84.7	84.7	84.7	84.7	84.7	84.7
Phosphoglycerate kinase 3 s	9991.43	233.678	L2·mol−2·s−1	10000	10000	10000	10000	10000	10000	10000	10000	10000	10000	10000	10000	10000	10000	10000	10000	10000	10000	10000	10000	10000	10000	10000	10000	10000	10000	10000	10000	10000	10000	10000	10000	10000	10000	10000	10000	10000	10000	10000	10000	10000	10000	10000	10000	10000	10000
Phosphoglycerate kinase 3 s_rev	7482.27	3229.41	s−1	540.692	6040.03	10000	2148.16	8132.45	4419.22	8891.86	2269.86	4729.21	4955.05	1188.92	9777.39	3944.76	3201.27	6309.55	6981.08	6239.54	6353.6	8547.5	3464.68	10000	221.198	8335.46	711.472	4183.08	6136.39	6461.45	487.669	1041.82	2400.7	8982.09	6260.59	10000	9766.46	1263.05	9529.85	237.695	3227.99	4590.6	966.483	5737.42	227.799	8499.27	1246.53	6835.97	8035.82
Phosphoglycerate kinase 4 s	4957.71	3364.7	s−1	4040.87	3445.03	6731.73	2224.34	3605.69	6839.57	8477.88	1834.49	195.334	10000	4875.63	6573.68	4431.93	9256.97	6386.72	1849.43	4611.28	9665.48	9246.49	2260.56	971.482	714.875	4029.27	8288.47	7419.04	10000	9369.72	7252.18	911.556	1946.16	315.081	2299.44	505.35	7838.68	4834.41	293.798	2387.41	3052.21	4606.43	4282.99	1537.94	4909.92	163.072	1190.74	1008.92	1949.41
Glyceraldehyde-3-phosphate dehydrogenase 1 s	10000	0	L2·mol−2·s−1	10000	10000	10000	10000	10000	10000	10000	10000	10000	10000	10000	10000	10000	10000	10000	10000	10000	10000	10000	10000	10000	10000	10000	10000	10000	10000	10000	10000	10000	10000	10000	10000	10000	10000	10000	10000	10000	10000	10000	10000	10000	10000	10000	10000	10000	10000
Glyceraldehyde-3-phosphate dehydrogenase 1 s_rev	945.013	625.528	s−1	2020.62	296.798	775.099	1737.21	2330.35	2249.06	490.556	1450.64	608.939	2242.67	875.114	2001.54	1452.75	234.327	22.7298	206.909	66.0214	246.366	2338.77	2235.29	1750.53	633.248	1062.86	236.924	1315.07	1793.4	1938.54	412.142	1373.49	1850.48	45.4314	2183.63	878.479	588.611	1480.66	1332.44	1769	1150.66	1619.02	500.812	1620.33	1387.05	963.322	1375.71	1255.4	2028.64
Glyceraldehyde-3-phosphate dehydrogenase 2 s	10000	0	s−1	10000	10000	10000	10000	10000	10000	10000	10000	10000	10000	10000	10000	10000	10000	10000	10000	10000	10000	10000	10000	10000	10000	10000	10000	10000	10000	10000	10000	10000	10000	10000	10000	10000	10000	10000	10000	10000	10000	10000	10000	10000	10000	10000	10000	10000	10000
Glyceraldehyde-3-phosphate dehydrogenase 3 s	8198.57	2697.19	L2·mol−2·s−1	10000	10000	10000	10000	10000	7727.17	6378.39	10000	10000	10000	8774.01	7487.8	10000	10000	10000	2876.47	1553.61	9194.57	716.645	10000	5573.57	2501.55	6604.56	8822.11	5510.72	10000	10000	10000	10000	3943.86	10000	3235.78	10000	10000	10000	10000	10000	9960.33	10000	10000	2622.67	10000	3490.01	6629.16	10000	10000
Glyceraldehyde-3-phosphate dehydrogenase 3 s_rev	9570.5	1599.29	s−1	10000	10000	10000	10000	10000	10000	10000	10000	10000	10000	10000	10000	10000	10000	10000	10000	7003.11	10000	2374.09	10000	10000	10000	10000	10000	10000	10000	10000	10000	10000	10000	10000	10000	10000	10000	10000	10000	10000	10000	10000	10000	10000	10000	10000	10000	10000	10000
Glyceraldehyde-3-phosphate dehydrogenase 4 s	1619.5	2110.12	s−1	18.7245	21.4335	17.2682	1.68165	40.2276	40.1748	140.569	96.348	74.906	78.9004	199.564	275.24	98.9294	149.514	65.2398	590.686	186.585	124.306	942.361	231.001	278.967	1394.18	325.236	380.835	428.935	18.7432	4.3586	165.644	254.538	752.836	193.349	1347.08	157.9	417.39	327.101	91.1238	202.978	458.479	384.443	208.973	2016.89	244.146	860.766	279.377	50.774	383.167
Triosephosphate isomerase 1 s	1249.49	350.697	L·mol−1·s−1	1239.25	1436.4	1555.83	1399.62	1489.76	1542.03	1525.04	1623.01	823.221	1615.33	672.566	1461.26	534.06	1028.47	1129.99	850.255	823.411	464.547	1162.54	1151.06	1617.23	1640.5	698.71	1112.02	1485.72	1104.51	1455.41	1226.88	1239.16	1405.93	1223.19	1345.07	1612.99	1498.08	1711.46	776.684	1358.19	1341.93	1193.5	1673.26	1355.49	1658.16	1503.48	1207.11	1451.75	1288.2
Triosephosphate isomerase 1 s_rev	2437.22	2299.59	s−1	1812.85	953.909	5372.46	9985.77	2796.75	4969.76	3861.61	2141.02	985.84	2319.12	526.76	1189.29	1024.77	2101.46	39.7476	406.212	7736.3	1101.15	3658.64	2097.33	668.201	699.208	2215.39	3693.17	346.564	6414.29	693.545	134.563	143.946	2507.04	645.745	83.9493	4011.56	1249.36	3487.08	1328.5	3743.84	445.882	30.7316	3439.99	832.852	5392.76	1618.46	5144.54	1593.36	3100.97
Triosephosphate isomerase 2 s	3372	0	s−1	3372	3372	3372	3372	3372	3372	3372	3372	3372	3372	3372	3372	3372	3372	3372	3372	3372	3372	3372	3372	3372	3372	3372	3372	3372	3372	3372	3372	3372	3372	3372	3372	3372	3372	3372	3372	3372	3372	3372	3372	3372	3372	3372	3372	3372	3372
Triosephosphate isomerase 3 s	155.482	60.1297	L·mol−1·s−1	186.705	167.544	195.998	86.9428	100.977	41.9204	190.561	167.973	95.5938	44.5756	59.9895	127.77	167.741	235.766	229.549	107.928	242.298	154.295	131.721	208.841	232.323	218.482	198.587	95.35	227.553	70.5582	56.7571	151.814	111.168	140.792	230.528	176.094	228.421	182.379	127.774	148.558	196.583	241.302	161.703	63.7446	247.709	166.782	207.62	154.949	206.974	177.729
Triosephosphate isomerase 3 s_rev	7950.97	3167.41	s−1	7578.23	10000	10000	10000	10000	9449.73	2268.38	10000	5144.92	10000	10000	10000	10000	10000	9265.69	878.05	10000	10000	10000	10000	10000	10000	10000	10000	7309.61	10000	10000	10000	871.589	10000	10000	4723.21	10000	10000	10000	10000	10000	2928.51	10000	10000	10000	2828.53	10000	1803.07	10000	3388.45
Triosephosphate isomerase 4 s	6090.9	3645.83	s−1	10000	9280.89	1084.96	3198.2	360.499	7337.8	10000	4517.11	10000	2853.78	3587.44	171.813	603.184	958.378	10000	10000	1070.71	350.117	2289.46	2756.77	4902.37	2668.81	6935.66	9507.97	10000	1991.13	6050.89	6763.62	10000	6577.4	7225.6	10000	6632.64	8502.26	8219.32	2267.77	5123.46	10000	6992.2	969.884	4482.25	10000	5976.1	10000	3170.81	10000
Aldolase 1a s	3.03234	0.858788	L2·mol−2·s−1	2.39924	2.77622	3.36582	3.55	3.55686	2.71036	2.76983	2.19162	2.01316	3.36762	2.40912	3.21513	3.15657	2.38869	3.19068	4.25484	4.05217	1.60074	2.57846	1.90664	4.00315	3.91962	3.16561	1.59135	3.58318	4.244	2.79457	2.7067	3.31906	2.98242	1.29688	4.08189	4.2122	4.06425	3.99982	2.84224	2.11043	3.55149	2.73609	3.17261	2.2117	2.72764	1.5249	3.99162	3.33347	2.72779
Aldolase 1a s_rev	6216.51	3658.17	s−1	1191.2	10000	3070.84	7132.26	1670.14	10000	730.313	7297.22	10000	3294.8	10000	10000	10000	2364.2	5494.44	1625.55	10000	1179.25	201.079	5491.24	6701.45	10000	10000	4205.26	2399.32	10000	1761.32	10000	3028.97	2949.75	1978.88	7352.05	10000	10000	4239.06	10000	4311.52	10000	10000	10000	170.576	10000	2028.27	7237.24	10000	2040.19
Aldolase 2a s	8320.84	2554.61	s−1	10000	2830.13	10000	10000	10000	4442.77	10000	10000	3634.11	10000	6850.87	5914.97	5045.24	10000	10000	10000	4577.81	10000	10000	10000	10000	4526.33	2789.93	10000	10000	4127.85	10000	4242.71	10000	10000	10000	10000	3307.02	8783.83	10000	3474.83	10000	3972.79	9904.19	8710.26	10000	8163.2	10000	10000	9606.16	10000
Aldolase 3a s	686.315	278.073	L·mol−1·s−1	765.453	117.614	590.076	1051.16	1059.12	224.867	551.234	539.185	949.242	745.838	981.115	872.519	511.961	584.697	1073.02	865.145	566.468	707.461	880.329	31.1935	475.388	411.239	1034.67	970.627	625.613	178.405	781.85	504.572	740.676	1074.87	739.187	695.459	621.815	711.613	473.765	385.484	756.206	164.746	1088.73	350.67	777.099	430.572	362.677	771.298	349.167	1031.92
Aldolase 3a s_rev	408.4	930.063	s−1	578.389	96.4015	28.3363	91.6685	54.9838	97.3098	29.9949	142.325	5442.18	55.2523	315.918	315.284	225.244	133.337	134.821	11.2665	406.661	201.891	35.1243	120.767	20.5886	152.685	781.022	626.191	2.9416	206.682	97.7647	264.908	9.95059	283.69	1403.54	32.4064	93.0613	99.7666	20.3212	118.271	200.14	6.05476	439.135	30.7669	66.5009	52.3223	51.4866	38.7744	20.3351	58.1049
Aldolase 4a s	64.5	0	s−1	64.5	64.5	64.5	64.5	64.5	64.5	64.5	64.5	64.5	64.5	64.5	64.5	64.5	64.5	64.5	64.5	64.5	64.5	64.5	64.5	64.5	64.5	64.5	64.5	64.5	64.5	64.5	64.5	64.5	64.5	64.5	64.5	64.5	64.5	64.5	64.5	64.5	64.5	64.5	64.5	64.5	64.5	64.5	64.5	64.5	64.5
Fructose-1,6-bisphosphatase 1 s	662.95	263.976	L·mol−1·s−1	601.503	1101.16	662.472	398.42	259.964	433.178	509.553	354.617	164.952	478.616	754.425	629.417	572.17	606.272	770.406	425.121	734.978	248.724	430.497	353.19	1068.14	216.224	522.741	273.459	935.513	463.776	514.744	132.654	653.783	975.341	817.488	837.985	1030.17	834.204	633.026	759.399	537.903	661.484	595.448	1090.86	790.439	196.354	664.389	746.115	1037.36	626.3
Fructose-1,6-bisphosphatase 1 s_rev	8931.72	2412.69	s−1	2592.98	10000	10000	10000	2007.99	10000	7491.18	10000	2921.51	8889.49	10000	10000	10000	9619.65	10000	10000	10000	2497.52	10000	1487.86	10000	1161.01	10000	3736.23	10000	6667.16	6948.28	2064.22	10000	10000	10000	10000	10000	10000	7285.67	10000	10000	10000	10000	10000	10000	10000	10000	10000	10000	10000
Fructose-1,6-bisphosphatase 2 s	5261.97	3285	s−1	10000	1123.61	6297.88	3429.47	10000	4101.21	10000	8177.64	10000	10000	1302.78	3432.85	3874.71	10000	3167.66	9764.39	5203.24	10000	2415.02	10000	3209.46	10000	2355.47	10000	1895.05	10000	10000	9877.77	269.207	6850.13	4342.59	2100.89	159.522	3409.47	10000	758.155	5781.67	2006.35	5555.87	1527.52	2944.05	6776.77	2344.54	1862.97	1782.31	738.108
Transketolase 1a s	2.47951	0.807043	L2·mol−2·s−1	1.65057	3.62077	2.86848	2.16428	2.19494	3.26189	1.49319	2.96582	1.97652	2.5803	3.67714	3.26819	1.06921	0.616289	2.54481	2.89091	2.3808	2.46909	1.6907	3.65039	1.72077	3.50597	3.56331	3.46615	1.71871	2.96403	3.48806	3.53929	2.53714	1.64271	0.873598	3.68017	3.0953	2.59764	1.42602	2.81426	1.72313	3.3125	3.01625	3.71234	2.32068	2.85903	3.13628	1.61155	3.39649	3.39524
Transketolase 1a s_rev	6655.98	3590.08	s−1	2986.32	8748.19	10000	10000	7578.24	1161.01	3134.64	10000	10000	5444.76	8640.77	10000	7327.32	1696.84	10000	1517.65	6150.61	9281.46	5619.65	6275.84	4611.21	10000	10000	10000	9869.82	10000	10000	5221.63	502.118	10000	3488.69	7611.57	6453.86	6944.29	1126.59	10000	1408.17	10000	10000	9262.34	10000	6972.32	1114.77	9263.77	10000	5572.8
Transketolase 2a s	7988.45	2743.94	s−1	10000	10000	4564.63	3129.17	10000	10000	10000	2891.49	9215.97	10000	10000	6414.46	10000	10000	4699.41	10000	10000	10000	10000	10000	10000	2748.71	2040.7	2625.05	10000	4077.34	2041.71	10000	10000	6500.92	10000	10000	10000	10000	10000	5291.57	10000	5114.58	2918.11	10000	9949.83	10000	10000	10000	5311.64	10000
Transketolase 3a s	9389.12	1756.8	L2·mol−2·s−1	10000	10000	4828.18	2531.57	5924.81	10000	10000	10000	10000	10000	10000	10000	10000	10000	10000	10000	10000	10000	10000	10000	10000	10000	10000	10000	10000	9026.85	10000	10000	10000	10000	10000	10000	10000	10000	10000	10000	10000	10000	10000	10000	10000	10000	10000	10000	10000	10000
Transketolase 3a s_rev	7949.88	3128	s−1	10000	4814.37	5561.32	9772.08	3899.35	296.631	10000	10000	10000	2806.79	4962.1	8578.78	10000	10000	10000	4214.66	8725.48	10000	10000	7412.87	10000	10000	10000	10000	10000	7173.11	10000	814.375	925.188	10000	10000	3399.67	9810.81	10000	10000	10000	7936.39	10000	10000	7219.61	10000	2844.41	1776.51	10000	10000	2901.22
Transketolase 4a s	5680.18	3830.97	s−1	6646.61	10000	10000	592.147	10000	10000	3132.63	966.758	4956.88	10000	10000	10000	545.941	123.693	1615.7	10000	10000	5846.73	2164.16	10000	4283.59	1068.47	675.955	3626.78	1729.2	9798.63	526.294	10000	10000	455.499	582.329	10000	10000	7923.82	5828.21	2199.72	10000	3978.22	746.398	10000	2744.28	10000	10000	1876.41	7077.96	10000
Aldolase 1b s	3.56009	1.05491	L2·mol−2·s−1	3.45559	1.77397	2.68347	3.82596	2.04726	3.93439	1.22228	2.81426	3.48193	4.08953	1.9343	4.08437	4.8428	2.62108	3.73811	4.10705	3.18092	4.39069	3.39666	1.20459	2.49143	3.78108	3.21685	2.52256	3.85184	3.31167	2.26961	3.19128	2.2545	3.00868	2.13427	2.63841	2.42277	2.76443	2.16528	3.61012	2.84421	2.70161	3.77033	3.24117	2.14107	2.38914	3.05969	3.03595	3.6622	4.4343
Aldolase 1b s_rev	6771.06	3531.48	s−1	10000	5145.47	10000	10000	7602.58	10000	462.395	9665.53	10000	10000	10000	10000	10000	7583.99	6755.62	10000	2282.86	10000	10000	3382.95	1932.36	10000	5476.96	10000	10000	9791.25	1273.33	10000	10000	4731.82	8501.4	10000	10000	10000	1578.71	2780.9	3989.77	10000	10000	6532.43	7472.14	10000	2164.65	763.11	1223.25	10000
Aldolase 2b s	7923.07	2791.82	s−1	3448.53	10000	9727.4	8564.67	10000	8613.75	10000	10000	8591.14	3780.21	8549.17	3064.42	2865.79	10000	10000	3798.65	10000	9859.89	3383.3	10000	10000	3894.3	10000	4230.67	8868.45	10000	10000	5083.6	8791.21	10000	10000	3679.81	9044.76	3836.98	10000	10000	10000	9001.13	7936.34	10000	10000	5200.31	10000	10000	10000	2682.28
Aldolase 3b s	326.574	134.991	L·mol−1·s−1	432.179	505.651	304.83	250.52	79.4914	458.748	391.085	197.831	261.056	339.31	31.6022	223.115	371.971	88.5171	420.319	72.4109	478.643	442.012	142.302	342.442	413.401	418.358	357.318	411.235	345.514	336.839	396.065	341.121	327.026	227.478	74.7772	109.556	399.977	100.755	534.252	498.757	255.164	95.538	160.296	485.423	283.078	18.8807	360.508	528.104	466.737	134.299
Aldolase 3b s_rev	189.697	586.906	s−1	526.599	234.723	93.6682	32.191	16.3792	74.707	177.113	40.6559	44.8025	169.367	14.0452	182.08	212.007	2.06423	41.9043	15.4862	36.755	47.7948	186.721	382.339	47.5702	255.402	38.1288	1775.53	50.7385	59.1968	48.466	194.134	197.199	16.1984	14.7194	1674.01	189.704	315.008	86.2664	32.2414	21.5571	14.8147	15.1703	68.8471	105.493	12.3252	23.3723	35.7336	19.3807	109.894
Aldolase 4b s	25.2	4.47866e-13	s−1	25.2	25.2	25.2	25.2	25.2	25.2	25.2	25.2	25.2	25.2	25.2	25.2	25.2	25.2	25.2	25.2	25.2	25.2	25.2	25.2	25.2	25.2	25.2	25.2	25.2	25.2	25.2	25.2	25.2	25.2	25.2	25.2	25.2	25.2	25.2	25.2	25.2	25.2	25.2	25.2	25.2	25.2	25.2	25.2	25.2	25.2
Sedoheptulose-1,7-phosphatase 1 s	311.087	133.343	L·mol−1·s−1	520.238	141.853	312.461	531.587	423.731	264.902	465.246	180.813	106.068	455.927	111.763	271.409	376.019	269.464	336.844	360.348	479.183	164.189	353.714	406.686	242.066	475.425	384.421	274.411	492.105	149.499	327.533	517.003	154.626	319.145	263.541	368.569	133.394	176.066	274.364	305.831	118.179	477.342	276.397	134.192	330.787	231.525	218.824	195.139	274.707	378.231
Sedoheptulose-1,7-phosphatase 1 s_rev	272.618	151.573	s−1	510.363	80.2469	274.18	523.264	400.662	220.119	447.853	124.533	39.5695	437.259	46.0432	227.515	346.427	225.305	301.896	328.614	463.695	105.637	321.073	381.287	194.16	459.423	355.978	230.928	478.384	88.9375	291.312	506.685	94.7663	281.777	218.572	337.958	70.6316	119.137	230.874	266.643	53.3359	461.603	233.185	71.5377	295.011	182.178	167.741	140.817	231.263	348.941
Sedoheptulose-1,7-phosphatase 2 s	81	0	s−1	81	81	81	81	81	81	81	81	81	81	81	81	81	81	81	81	81	81	81	81	81	81	81	81	81	81	81	81	81	81	81	81	81	81	81	81	81	81	81	81	81	81	81	81	81	81
Transketolase 1b s	0.815597	0.261736	L2·mol−2·s−1	0.32526	0.998305	0.919022	1.06576	0.928254	0.539377	1.00602	0.979652	0.781312	0.445579	0.999321	0.79494	1.04808	1.04703	1.17161	1.19948	0.757606	0.950626	0.939733	0.502283	1.12807	0.565144	0.427339	0.489549	0.930164	0.847569	0.347018	0.693762	1.04135	0.409088	1.19811	0.759565	1.07676	0.573212	1.02379	0.846388	1.06829	1.06544	0.448701	0.881607	1.08377	0.895792	1.04961	0.371908	1.01622	1.19391
Transketolase 1b s_rev	6591.28	3650.57	s−1	9955.05	1564.35	3677.5	950.748	3328.2	10000	816.334	8615.35	1576.56	10000	10000	10000	1978.66	10000	5195.53	5238.73	1981.57	10000	10000	10000	1697.76	432.861	769.258	4286.38	45.8632	10000	5336.52	3624.67	10000	10000	10000	10000	10000	3194.19	10000	10000	2577.83	10000	2952.34	10000	10000	10000	289.936	1161.59	4705.47	10000
Transketolase 2b s	7962.99	2738.1	s−1	10000	10000	10000	10000	10000	5197.22	10000	10000	10000	5837.68	5780.97	6141.54	10000	7869.94	10000	10000	10000	2252.31	6131.65	9852.53	10000	10000	10000	10000	10000	5873.8	10000	10000	4624.19	8401.04	4745.98	4648.23	3705.47	10000	4709.4	3866.68	10000	3919.09	10000	3070.2	7577.02	4774.46	10000	10000	10000	3011.53
Transketolase 3b s	5415.39	2776.05	L2·mol−2·s−1	3905.32	7062.95	10000	10000	10000	4690.95	4892.53	8818.81	9726.45	6808.41	4596.27	3281.8	6804.53	6511.74	5191.54	3702.63	8172.65	5009.72	1455.46	3363	6120.64	5574.05	3485.52	8430.49	5943.73	10000	2439.88	7881.95	4220.53	2378.04	5452.5	1513.9	2114.19	5026.32	3294.56	2434.88	9643.78	3109.05	1492.52	1203.12	2612.03	2611.05	6321.16	5117.48	7782.34	8065.48
Transketolase 3b s_rev	8191.42	2957.12	s−1	10000	4557.96	7378.58	2750.9	10000	10000	1655.94	10000	7633.03	10000	10000	10000	5426.66	10000	3300.59	1520.79	10000	10000	6710.02	10000	1809.29	10000	7496.85	10000	3297.86	10000	10000	10000	10000	10000	10000	10000	10000	10000	10000	10000	7365.45	10000	4800.08	10000	7884.68	10000	3710.56	10000	6484.96	10000
Transketolase 4b s	5611.44	3749.71	s−1	30.3779	10000	10000	10000	8009.89	297.549	10000	4559.57	10000	40.4121	4209.02	7688.49	10000	3335.39	10000	10000	8588.54	186.968	10000	1445	10000	5869.2	10000	5903.42	10000	4709.33	2505.52	4879.83	3865.66	466.248	2762.66	5672.7	4892.7	5154.55	5323.17	2038.83	10000	4239.57	10000	2925.31	10000	8940.33	10000	2949.15	10000	1066.68
Ribulose-5-phosphate epimerase 1 s	10000	0	L·mol−1·s−1	10000	10000	10000	10000	10000	10000	10000	10000	10000	10000	10000	10000	10000	10000	10000	10000	10000	10000	10000	10000	10000	10000	10000	10000	10000	10000	10000	10000	10000	10000	10000	10000	10000	10000	10000	10000	10000	10000	10000	10000	10000	10000	10000	10000	10000	10000
Ribulose-5-phosphate epimerase 1 s_rev	5571.46	3607.9	s−1	3745.45	319.153	1380.1	6188.58	3458.02	10000	1482.28	6250.4	2462.08	4933.5	193.312	10000	10000	8943.1	607.143	9935.79	5882.41	1666.95	10000	2978.76	2391.36	4754.39	3258.34	10000	4619.77	1928.73	6265.6	4060.05	7362.36	2126.28	355.499	10000	10000	9410.11	1665.33	619.384	3702.64	545.975	8788.44	2297.58	10000	3020.85	2116.02	7195.5	7583.95	6080.74
Ribulose-5-phosphate epimerase 2 s	9197.78	1578.22	s−1	10000	10000	10000	10000	10000	6224.73	10000	10000	10000	10000	10000	8954.07	9493.18	10000	10000	10000	10000	10000	5859.47	10000	10000	10000	10000	4877	10000	10000	10000	10000	10000	10000	10000	5267.4	9395.44	10000	10000	10000	10000	10000	10000	10000	6745.1	10000	10000	10000	10000	10000
Ribulose-5-phosphate epimerase 3 s	20.8059	73.6769	L·mol−1·s−1	10.1584	10.0515	8.36493	5.94278	5.87669	2.62657	17.9445	6.84727	5.16354	13.1806	52.3841	10.0148	10.2028	6.22911	30.0343	20.7819	12.2586	6.7486	23.5812	10.5646	15.3656	7.94778	18.0198	6.59622	8.36249	9.37127	12.5079	18.9211	14.1812	31.1298	17.6641	15.8249	6.87709	12.5977	9.50974	14.4898	16.9312	21.6597	24.1514	11.0838	14.2773	13.3795	9.41166	8.50974	1.71256	15.9252
Ribulose-5-phosphate epimerase 3 s_rev	8274.79	2904.58	s−1	7082.79	2208.39	8074.47	7297.15	10000	5997.17	9390.36	5664.47	10000	10000	10000	10000	10000	2864.94	10000	10000	10000	418.103	10000	2247.89	10000	740.511	10000	10000	7254.4	10000	10000	10000	10000	10000	4017.84	10000	10000	10000	822.509	2457.92	10000	10000	10000	2483.82	10000	10000	7137.03	7872.77	1887.75	10000
Ribulose-5-phosphate epimerase 4 s	5291.54	3788.41	s−1	10000	10000	10000	10000	3016.97	7275.99	10000	10000	8756.86	3323.71	219.601	1804.16	4722.94	10000	2115.37	2442.92	6137.62	10000	436.139	10000	3846.78	10000	1103.38	37.3672	10000	1593.35	4811.36	2936.15	4186.2	5396.42	10000	196.836	5619.12	1586.19	10000	10000	3794.1	6141.55	1633.39	10000	1434.57	3192.54	10000	10000	6838.88	4683.47
Ribose-5-phosphate isomerase 1 s	670.676	215.381	L·mol−1·s−1	616.805	666.787	718.743	658.32	964.973	723.502	414.023	553.955	929.896	481.467	518.727	506.019	776.406	970.005	755.288	724.949	565.115	479.016	755.853	813.989	443.162	337.773	276.465	631.806	831.275	349.424	970.242	499.212	630.173	760.545	808.791	818.323	895.035	827.596	521.424	666.72	450.402	611.041	683.707	866.818	770.955	474.106	946.858	481.448	761.725	151.853
Ribose-5-phosphate isomerase 1 s_rev	3158.15	2572.54	s−1	210.576	5818.14	5262.99	1441.87	8448.07	2671.01	4853.44	9016.93	1242.6	2639.48	270.923	498.289	7954.29	2731.31	975.604	1009.76	2774.03	2428.27	2639.94	4675.06	1222.89	3720.07	2186.69	2981.12	28.1934	1377.9	3464.65	4211.01	293.582	2369.6	3612.17	9888.29	5435.15	5863.12	3635.48	2706.69	4833.3	1177.65	8964.01	1599.44	1893.33	4838.56	1825.9	1760.08	1172.35	317.113
Ribose-5-phosphate isomerase 2 s	3440	0	s−1	3440	3440	3440	3440	3440	3440	3440	3440	3440	3440	3440	3440	3440	3440	3440	3440	3440	3440	3440	3440	3440	3440	3440	3440	3440	3440	3440	3440	3440	3440	3440	3440	3440	3440	3440	3440	3440	3440	3440	3440	3440	3440	3440	3440	3440	3440
Ribose-5-phosphate isomerase 3 s	793.691	309.024	L·mol−1·s−1	1037.49	1008.43	577.645	925.047	1232.14	711.861	363.776	201.552	1013.29	831.492	809.809	1127.76	127.791	971.005	745.548	785.089	303.225	603.24	1206.63	858.617	782.919	1015.41	651.642	1191.22	929.743	156.741	1001.53	283.455	1043.46	1097.67	1156.61	1028.45	856.907	1153.31	1122.2	461.953	897.526	602.424	809.685	1207.48	495.167	735.764	1163.48	270.014	977.371	403.982
Ribose-5-phosphate isomerase 3 s_rev	7856.15	3249.03	s−1	8861.41	10000	10000	10000	10000	10000	10000	10000	5004.39	10000	8979.03	10000	326.864	9410.59	3339.68	4968	3773.05	10000	10000	10000	10000	10000	10000	10000	949.507	1015.77	10000	10000	8995.51	10000	10000	10000	10000	10000	10000	5698.34	10000	5245.18	10000	10000	1081.07	10000	9523.57	1889.34	8304.77	10000
Ribose-5-phosphate isomerase 4 s	6169.5	3625.85	s−1	10000	1614.18	4705.08	7815.98	1697.96	8951.42	1473.04	1329.48	10000	2579.25	10000	5060.06	9986.31	10000	10000	10000	10000	4279.08	4273.98	4337.47	4354.16	357.932	713.124	2684.2	10000	10000	8338.76	6485.43	10000	5492.87	3834.3	1020.46	4431.8	2249.24	1510.07	10000	791.289	10000	926.933	8733.98	10000	1181.99	10000	10000	10000	163.974
Phosphoribulokinase 1 s	10000	0	L2·mol−2·s−1	10000	10000	10000	10000	10000	10000	10000	10000	10000	10000	10000	10000	10000	10000	10000	10000	10000	10000	10000	10000	10000	10000	10000	10000	10000	10000	10000	10000	10000	10000	10000	10000	10000	10000	10000	10000	10000	10000	10000	10000	10000	10000	10000	10000	10000	10000
Phosphoribulokinase 1 s_rev	7978.48	2788.85	s−1	10000	10000	2771.58	5740.05	7381	8780.09	6547.35	7137.04	6849.71	10000	10000	10000	10000	10000	5246.93	10000	10000	10000	10000	10000	10000	4387.34	10000	8927.23	5513.98	9728.92	5185.48	10000	4090.8	10000	10000	8256.63	10000	4797.29	10000	5544.51	10000	10000	10000	9734.52	10000	8332.02	10000	10000	10000	10000
Phosphoribulokinase 2 s	8978.95	1217.21	s−1	7022.88	8204.97	10000	10000	10000	10000	10000	10000	10000	9162.44	7607.99	7730.25	7759.92	7061.3	10000	7777.82	7178.83	7794.1	8794.8	9011.3	8454.49	10000	7177.9	10000	10000	10000	10000	9637.12	10000	7282.74	7047.82	10000	8248.31	10000	9166.49	10000	7160.93	6926.96	7588.01	10000	7006.26	10000	7764.5	7512.53	6774.91	7041.25
Phosphoglucoisomerase 1 s	138.812	51.974	L·mol−1·s−1	206.296	130.543	169.795	141.74	133.883	52.5332	81.0156	161.724	97.8889	192.727	51.0464	158.645	148.38	117.525	164.674	168.776	162.774	192.78	42.341	127.254	49.5444	163.794	71.2706	167.728	161.881	144.892	69.1359	129.557	188.473	206.288	161.11	200.093	156.991	174.707	206.119	53.5977	156.109	210.457	80.2172	177.864	104.443	173.975	112.086	160.238	213.703	203.943
Phosphoglucoisomerase 1 s_rev	7351.71	3412.81	s−1	250.046	3241.94	10000	10000	10000	10000	3892.66	10000	10000	10000	10000	10000	9128.37	10000	7266.59	453.654	9964.96	1816.37	10000	8325.82	2311.84	10000	3629.19	10000	10000	10000	4277.69	10000	7955.68	3018.47	7479.97	10000	4118.93	2813.57	1257.48	1751.69	10000	4755.37	1761.54	10000	359.352	10000	10000	10000	10000	10000
Phosphoglucoisomerase 2 s	6923.71	3408.5	s−1	10000	10000	3178.54	3286.31	9663.45	2209.29	10000	9731.6	6080.49	4024.66	1564.1	3626.52	10000	4336.35	10000	10000	10000	10000	3192.86	10000	10000	769.955	10000	1141.63	7000.28	4882.27	10000	1067.42	10000	10000	10000	8827.36	10000	10000	10000	10000	2356.17	10000	10000	3876.06	10000	5157.32	5669.7	9535.33	5868.92	4078.62
Phosphoglucoisomerase 3 s	81.9348	31.8105	L·mol−1·s−1	92.945	127.121	93.1149	52.5585	50.0127	13.9862	71.2877	62.7838	70.7717	111.09	92.4691	112.898	107.396	115.276	55.2144	97.0177	53.4534	102.113	51.5671	83.3456	62.781	50.8903	68.6815	55.0058	71.4459	29.3627	110.402	132.014	102.418	108.927	88.1301	111.928	113.347	130.684	100.384	115.831	26.8221	112.206	112.774	80.6973	123.605	114.441	131.499	56.5954	115.577	125.723
Phosphoglucoisomerase 3 s_rev	7733.62	3290.85	s−1	1061.7	9612.63	10000	9489.25	5574.12	4214.74	10000	3219.8	10000	10000	10000	10000	10000	10000	227.312	593.168	4224.63	869.914	10000	10000	10000	10000	8172.98	10000	7551.92	10000	10000	10000	2805.35	6147.79	9765.46	9366.31	3507.15	7210.96	1645.99	10000	10000	2205.8	10000	10000	10000	10000	10000	966.836	10000	10000
Phosphoglucoisomerase 4 s	5986.13	3742.99	s−1	10000	10000	1500.04	10000	10000	6317.95	3524.45	10000	5485.76	2367.66	1414.45	2742.37	7525.78	220.884	10000	10000	10000	10000	3688.1	3921.23	2191.96	333.729	10000	861.962	10000	8536.74	1109.4	1015.3	10000	10000	10000	10000	10000	10000	10000	5116.81	8504.08	10000	4324.72	6180.93	8839.15	6353.34	2634.48	10000	6942.22	6328.46
Phosphoglucomutase 1 s	84.9049	31.4462	L·mol−1·s−1	117.275	71.082	119.284	20.4329	51.5293	51.9943	70.7395	35.6281	43.4657	128.472	0.729017	132.443	48.9663	62.563	26.228	111.201	104.133	122.328	65.9525	121.991	120.453	124.484	55.9841	32.5411	132.231	64.1265	65.7172	126.817	72.8587	63.2584	49.4054	124.574	9.92031	55.4422	60.6939	96.2119	106.832	15.0708	98.9467	62.8559	83.6718	131.881	52.9996	95.7306	102.531	67.7106
Phosphoglucomutase 1 s_rev	7328.44	3382.66	s−1	8602.91	10000	8088.66	1367.61	10000	10000	7596.82	10000	2705.31	10000	333.679	10000	8260.92	7275.14	7366.72	10000	10000	10000	10000	5211.8	6348.44	1443.12	10000	10000	10000	10000	986.612	10000	7202.7	6934.06	6214.83	10000	3448.57	10000	7914.68	4297.53	10000	8518.36	2821.19	10000	5893.73	6054.92	1351.58	10000	8208.98	7727.93
Phosphoglucomutase 2 s	6855.79	3502.96	s−1	10000	8302.48	10000	10000	3176.45	362.01	10000	2599.97	10000	2630.67	215.328	3810.67	10000	10000	10000	3808.02	2395.62	8693.78	5671.66	10000	10000	10000	6224.23	3298.79	19.1325	4727.78	10000	2609.57	10000	10000	10000	3114.96	4022.19	1668.62	10000	10000	2411.79	2831.12	10000	6246.28	10000	10000	10000	2863.7	10000	10000
Phosphoglucomutase 3 s	862.442	342.501	L·mol−1·s−1	1315.75	395.353	1117.68	782.829	1082.68	460.031	397.094	845.829	1195.14	300.046	219.553	769.285	635.874	365.04	536.32	860.55	1364.79	1328.93	1308.37	727.738	676.846	1219.91	1129.04	700.886	1113.88	229.784	1132.38	791.823	1094.75	559.258	998.567	1009.29	541.47	431.139	1123.77	987.367	1162.95	903.384	1388.85	1273.77	1107.71	990.428	772.048	442.684	587.556	1199.32
Phosphoglucomutase 3 s_rev	7826.03	3239.07	s−1	10000	334.196	10000	10000	10000	10000	6507.03	10000	10000	10000	10000	10000	10000	10000	10000	10000	10000	10000	10000	1391.49	733.231	1293.41	10000	10000	10000	10000	10000	10000	8064.84	10000	10000	10000	10000	10000	10000	2019.83	10000	10000	9135.79	10000	10000	485.552	4991.41	6977.65	179.573	10000
Phosphoglucomutase 4 s	6021.87	3733.86	s−1	2305.26	10000	9831.62	4558.83	418.756	1104.31	10000	786.944	4708.55	9652.63	5570.87	9051.14	7146.47	9386.39	2595.93	3923.59	624.909	6646.88	3363.53	10000	10000	10000	3366.95	290.4	4.94947	2901.19	6128.74	6842.13	10000	1650.74	2404.08	4472.93	6841.91	46.2853	774.258	10000	1538.26	1044	10000	2519.87	8540.87	10000	10000	10000	10000	7920.87
Glucose-1-phosphate adenylyltransferase 1 s	9985.87	257.628	L2·mol−2·s−1	10000	10000	10000	10000	10000	10000	10000	10000	10000	10000	10000	10000	10000	10000	10000	10000	10000	10000	10000	10000	10000	10000	10000	10000	10000	10000	10000	10000	10000	10000	10000	10000	10000	10000	10000	10000	9212.92	10000	10000	10000	10000	10000	10000	10000	10000	10000
Glucose-1-phosphate adenylyltransferase 1 s_rev	6820.71	3629.52	s−1	2460.73	10000	708.686	8467.43	10000	260.829	10000	10000	5176.95	4186.6	6401.32	10000	10000	10000	10000	9435.76	3959.15	10000	10000	3180.43	3625.44	10000	10000	10000	7889.5	10000	10000	10000	3707.07	1013.07	6213.82	7559.57	10000	5072.18	271.347	10000	717.808	9411.68	5373.67	10000	3484.53	2851.5	10000	1767.97	4548.36	10000
Glucose-1-phosphate adenylyltransferase 2 s	7107.09	3421.97	s−1	10000	9856.46	10000	2961.05	3457.96	7206.42	3012.04	1048.46	10000	10000	10000	6868.46	6659.71	4151.9	5897.89	10000	10000	2788.85	9599.1	10000	10000	3335.5	4703.61	2532.48	10000	9506.64	8251.65	3593.95	10000	10000	10000	10000	6131.96	10000	10000	476.427	5913.38	10000	10000	5959.92	10000	10000	1598.78	10000	10000	6043.15
Glucose-1-phosphate adenylyltransferase 3 s	661.275	1089.72	L2·mol−2·s−1	2519.88	870.976	155.212	1015.13	141.672	603.319	27.2615	10000	1381.63	192.999	2002.61	297.298	679.429	52.2115	732.14	827.16	541.58	343.568	351.592	1606.88	912.143	2671.15	550.541	877.633	232.172	571.663	246.599	1543.82	5005.83	1708.41	244.3	570.151	536.691	400.323	752.811	1122.97	4009.98	1170.7	686.719	1066.83	1471.6	853.597	251.225	3120.52	967.694	1037.04
Glucose-1-phosphate adenylyltransferase 3 s_rev	7979.91	3113.12	s−1	10000	6780.78	4677.07	10000	4462.97	10000	3826.14	10000	10000	10000	10000	10000	8483.04	868.608	10000	10000	6492.71	10000	8154.06	10000	10000	10000	10000	10000	3262.63	10000	10000	10000	8659.95	4616.28	3075.63	7922	1692.37	10000	10000	10000	10000	2505.13	2457.38	10000	6785.73	3574	7740.23	2057.92	1317.24	10000
Glucose-1-phosphate adenylyltransferase 4 s	5884.47	3712.2	s−1	2637.46	10000	10000	2506.9	9000.37	3765.61	7.52338	19.4181	2846.3	4922.55	5837.12	5293.42	10000	4397.55	907.486	1969.47	10000	3235.5	10000	3935.31	4811.29	794.925	8865.49	1625.92	10000	1116	5914.91	2658.49	10000	10000	10000	10000	10000	8902.02	6124.57	1273.97	256.166	10000	10000	1717.16	10000	10000	9878.25	10000	10000	8962.53
ADPGstore s	10.9378	5.6148	s−1	12.3995	6.86072	9.08868	12.926	20.592	3.68266	6.88342	3.15626	5.98241	13.639	3.85563	11.4561	4.08483	14.1511	18.8537	5.02352	6.10641	17.6263	8.23016	3.55553	17.0745	16.116	9.70227	11.8015	13.5485	8.1805	4.87813	1.41776	7.60756	6.29927	17.8352	3.35547	3.46097	18.2218	12.1632	9.18888	4.3341	4.03985	9.94362	6.46932	20.3696	7.67262	11.7543	11.6049	13.3302	4.46678
ADPGstore s_rev	472.957	269.15	µmol·L−1·s−1	293.587	359.491	335.345	657.079	919.112	194.752	198.449	139.465	302.846	554.554	238.131	533.821	183.489	528.875	864.324	182.996	197.228	793.51	449.499	25.3365	712.743	726.291	505.328	515.868	644.167	272.023	91.726	101.454	479.786	75.9166	759.804	161.604	283.043	810.109	382.64	522.398	161.812	225.68	415.093	310.841	941.561	426.914	579.24	580.232	626.669	306.782
Rubisco carboxylase 1 y	10000	0	L2·mol−2·s−1	10000	10000	10000	10000	10000	10000	10000	10000	10000	10000	10000	10000	10000	10000	10000	10000	10000	10000	10000	10000	10000	10000	10000	10000	10000	10000	10000	10000	10000	10000	10000	10000	10000	10000	10000	10000	10000	10000	10000	10000	10000	10000	10000	10000	10000	10000
Rubisco carboxylase 1 y_rev	0.192416	0.11483	s−1	0.2486	0.0603532	0.389339	0.292851	0.380061	0.330999	0.234077	0.210435	0.241005	0.337773	0.249548	0.314776	0.172693	0.326323	0.343715	0.197295	0.368117	0.085017	0.14112	0.0166146	0.216691	0.365657	0.177018	0.340336	0.203141	0.00987944	0.0202081	0.120721	0.098465	0.116041	0.273784	0.076086	0.187087	0.337694	0.349402	0.282793	0.00443718	0.117102	0.0841003	0.180408	0.385586	0.0747857	0.0190762	0.257585	0.227231	0.18491
Rubisco carboxylase 2 y	0.12975	1.95304e-15	s−1	0.12975	0.12975	0.12975	0.12975	0.12975	0.12975	0.12975	0.12975	0.12975	0.12975	0.12975	0.12975	0.12975	0.12975	0.12975	0.12975	0.12975	0.12975	0.12975	0.12975	0.12975	0.12975	0.12975	0.12975	0.12975	0.12975	0.12975	0.12975	0.12975	0.12975	0.12975	0.12975	0.12975	0.12975	0.12975	0.12975	0.12975	0.12975	0.12975	0.12975	0.12975	0.12975	0.12975	0.12975	0.12975	0.12975
Phosphoglycerate kinase 1 y	0	0	L2·mol−2·s−1	0	0	0	0	0	0	0	0	0	0	0	0	0	0	0	0	0	0	0	0	0	0	0	0	0	0	0	0	0	0	0	0	0	0	0	0	0	0	0	0	0	0	0	0	0	0
Phosphoglycerate kinase 1 y_rev	0	0	s−1	0	0	0	0	0	0	0	0	0	0	0	0	0	0	0	0	0	0	0	0	0	0	0	0	0	0	0	0	0	0	0	0	0	0	0	0	0	0	0	0	0	0	0	0	0	0
Phosphoglycerate kinase 2 y	0	0	s−1	0	0	0	0	0	0	0	0	0	0	0	0	0	0	0	0	0	0	0	0	0	0	0	0	0	0	0	0	0	0	0	0	0	0	0	0	0	0	0	0	0	0	0	0	0	0
Phosphoglycerate kinase 3 y	0	0	L2·mol−2·s−1	0	0	0	0	0	0	0	0	0	0	0	0	0	0	0	0	0	0	0	0	0	0	0	0	0	0	0	0	0	0	0	0	0	0	0	0	0	0	0	0	0	0	0	0	0	0
Phosphoglycerate kinase 3 y_rev	0	0	s−1	0	0	0	0	0	0	0	0	0	0	0	0	0	0	0	0	0	0	0	0	0	0	0	0	0	0	0	0	0	0	0	0	0	0	0	0	0	0	0	0	0	0	0	0	0	0
Phosphoglycerate kinase 4 y	0	0	s−1	0	0	0	0	0	0	0	0	0	0	0	0	0	0	0	0	0	0	0	0	0	0	0	0	0	0	0	0	0	0	0	0	0	0	0	0	0	0	0	0	0	0	0	0	0	0
Glyceraldehyde-3-phosphate dehydrogenase 1 y	0	0	L2·mol−2·s−1	0	0	0	0	0	0	0	0	0	0	0	0	0	0	0	0	0	0	0	0	0	0	0	0	0	0	0	0	0	0	0	0	0	0	0	0	0	0	0	0	0	0	0	0	0	0
Glyceraldehyde-3-phosphate dehydrogenase 1 y_rev	0	0	s−1	0	0	0	0	0	0	0	0	0	0	0	0	0	0	0	0	0	0	0	0	0	0	0	0	0	0	0	0	0	0	0	0	0	0	0	0	0	0	0	0	0	0	0	0	0	0
Glyceraldehyde-3-phosphate dehydrogenase 2 y	0	0	s−1	0	0	0	0	0	0	0	0	0	0	0	0	0	0	0	0	0	0	0	0	0	0	0	0	0	0	0	0	0	0	0	0	0	0	0	0	0	0	0	0	0	0	0	0	0	0
Glyceraldehyde-3-phosphate dehydrogenase 3 y	0	0	L2·mol−2·s−1	0	0	0	0	0	0	0	0	0	0	0	0	0	0	0	0	0	0	0	0	0	0	0	0	0	0	0	0	0	0	0	0	0	0	0	0	0	0	0	0	0	0	0	0	0	0
Glyceraldehyde-3-phosphate dehydrogenase 3 y_rev	0	0	s−1	0	0	0	0	0	0	0	0	0	0	0	0	0	0	0	0	0	0	0	0	0	0	0	0	0	0	0	0	0	0	0	0	0	0	0	0	0	0	0	0	0	0	0	0	0	0
Glyceraldehyde-3-phosphate dehydrogenase 4 y	0	0	s−1	0	0	0	0	0	0	0	0	0	0	0	0	0	0	0	0	0	0	0	0	0	0	0	0	0	0	0	0	0	0	0	0	0	0	0	0	0	0	0	0	0	0	0	0	0	0
Triosephosphate isomerase 1 y	0	0	L·mol−1·s−1	0	0	0	0	0	0	0	0	0	0	0	0	0	0	0	0	0	0	0	0	0	0	0	0	0	0	0	0	0	0	0	0	0	0	0	0	0	0	0	0	0	0	0	0	0	0
Triosephosphate isomerase 1 y_rev	0	0	s−1	0	0	0	0	0	0	0	0	0	0	0	0	0	0	0	0	0	0	0	0	0	0	0	0	0	0	0	0	0	0	0	0	0	0	0	0	0	0	0	0	0	0	0	0	0	0
Triosephosphate isomerase 2 y	0	0	s−1	0	0	0	0	0	0	0	0	0	0	0	0	0	0	0	0	0	0	0	0	0	0	0	0	0	0	0	0	0	0	0	0	0	0	0	0	0	0	0	0	0	0	0	0	0	0
Triosephosphate isomerase 3 y	0	0	L·mol−1·s−1	0	0	0	0	0	0	0	0	0	0	0	0	0	0	0	0	0	0	0	0	0	0	0	0	0	0	0	0	0	0	0	0	0	0	0	0	0	0	0	0	0	0	0	0	0	0
Triosephosphate isomerase 3 y_rev	0	0	s−1	0	0	0	0	0	0	0	0	0	0	0	0	0	0	0	0	0	0	0	0	0	0	0	0	0	0	0	0	0	0	0	0	0	0	0	0	0	0	0	0	0	0	0	0	0	0
Triosephosphate isomerase 4 y	0	0	s−1	0	0	0	0	0	0	0	0	0	0	0	0	0	0	0	0	0	0	0	0	0	0	0	0	0	0	0	0	0	0	0	0	0	0	0	0	0	0	0	0	0	0	0	0	0	0
Aldolase 1a y	0	0	L2·mol−2·s−1	0	0	0	0	0	0	0	0	0	0	0	0	0	0	0	0	0	0	0	0	0	0	0	0	0	0	0	0	0	0	0	0	0	0	0	0	0	0	0	0	0	0	0	0	0	0
Aldolase 1a y_rev	0	0	s−1	0	0	0	0	0	0	0	0	0	0	0	0	0	0	0	0	0	0	0	0	0	0	0	0	0	0	0	0	0	0	0	0	0	0	0	0	0	0	0	0	0	0	0	0	0	0
Aldolase 2a y	0	0	s−1	0	0	0	0	0	0	0	0	0	0	0	0	0	0	0	0	0	0	0	0	0	0	0	0	0	0	0	0	0	0	0	0	0	0	0	0	0	0	0	0	0	0	0	0	0	0
Aldolase 3a y	0	0	L·mol−1·s−1	0	0	0	0	0	0	0	0	0	0	0	0	0	0	0	0	0	0	0	0	0	0	0	0	0	0	0	0	0	0	0	0	0	0	0	0	0	0	0	0	0	0	0	0	0	0
Aldolase 3a y_rev	0	0	s−1	0	0	0	0	0	0	0	0	0	0	0	0	0	0	0	0	0	0	0	0	0	0	0	0	0	0	0	0	0	0	0	0	0	0	0	0	0	0	0	0	0	0	0	0	0	0
Aldolase 4a y	0	0	s−1	0	0	0	0	0	0	0	0	0	0	0	0	0	0	0	0	0	0	0	0	0	0	0	0	0	0	0	0	0	0	0	0	0	0	0	0	0	0	0	0	0	0	0	0	0	0
Fructose-1,6-bisphosphatase 1 y	0	0	L·mol−1·s−1	0	0	0	0	0	0	0	0	0	0	0	0	0	0	0	0	0	0	0	0	0	0	0	0	0	0	0	0	0	0	0	0	0	0	0	0	0	0	0	0	0	0	0	0	0	0
Fructose-1,6-bisphosphatase 1 y_rev	0	0	s−1	0	0	0	0	0	0	0	0	0	0	0	0	0	0	0	0	0	0	0	0	0	0	0	0	0	0	0	0	0	0	0	0	0	0	0	0	0	0	0	0	0	0	0	0	0	0
Fructose-1,6-bisphosphatase 2 y	0	0	s−1	0	0	0	0	0	0	0	0	0	0	0	0	0	0	0	0	0	0	0	0	0	0	0	0	0	0	0	0	0	0	0	0	0	0	0	0	0	0	0	0	0	0	0	0	0	0
Transketolase 1a y	0	0	L2·mol−2·s−1	0	0	0	0	0	0	0	0	0	0	0	0	0	0	0	0	0	0	0	0	0	0	0	0	0	0	0	0	0	0	0	0	0	0	0	0	0	0	0	0	0	0	0	0	0	0
Transketolase 1a y_rev	0	0	s−1	0	0	0	0	0	0	0	0	0	0	0	0	0	0	0	0	0	0	0	0	0	0	0	0	0	0	0	0	0	0	0	0	0	0	0	0	0	0	0	0	0	0	0	0	0	0
Transketolase 2a y	0	0	s−1	0	0	0	0	0	0	0	0	0	0	0	0	0	0	0	0	0	0	0	0	0	0	0	0	0	0	0	0	0	0	0	0	0	0	0	0	0	0	0	0	0	0	0	0	0	0
Transketolase 3a y	0	0	L2·mol−2·s−1	0	0	0	0	0	0	0	0	0	0	0	0	0	0	0	0	0	0	0	0	0	0	0	0	0	0	0	0	0	0	0	0	0	0	0	0	0	0	0	0	0	0	0	0	0	0
Transketolase 3a y_rev	0	0	s−1	0	0	0	0	0	0	0	0	0	0	0	0	0	0	0	0	0	0	0	0	0	0	0	0	0	0	0	0	0	0	0	0	0	0	0	0	0	0	0	0	0	0	0	0	0	0
Transketolase 4a y	0	0	s−1	0	0	0	0	0	0	0	0	0	0	0	0	0	0	0	0	0	0	0	0	0	0	0	0	0	0	0	0	0	0	0	0	0	0	0	0	0	0	0	0	0	0	0	0	0	0
Aldolase 1b y	0	0	L2·mol−2·s−1	0	0	0	0	0	0	0	0	0	0	0	0	0	0	0	0	0	0	0	0	0	0	0	0	0	0	0	0	0	0	0	0	0	0	0	0	0	0	0	0	0	0	0	0	0	0
Aldolase 1b y_rev	0	0	s−1	0	0	0	0	0	0	0	0	0	0	0	0	0	0	0	0	0	0	0	0	0	0	0	0	0	0	0	0	0	0	0	0	0	0	0	0	0	0	0	0	0	0	0	0	0	0
Aldolase 2b y	0	0	s−1	0	0	0	0	0	0	0	0	0	0	0	0	0	0	0	0	0	0	0	0	0	0	0	0	0	0	0	0	0	0	0	0	0	0	0	0	0	0	0	0	0	0	0	0	0	0
Aldolase 3b y	0	0	L·mol−1·s−1	0	0	0	0	0	0	0	0	0	0	0	0	0	0	0	0	0	0	0	0	0	0	0	0	0	0	0	0	0	0	0	0	0	0	0	0	0	0	0	0	0	0	0	0	0	0
Aldolase 3b y_rev	0	0	s−1	0	0	0	0	0	0	0	0	0	0	0	0	0	0	0	0	0	0	0	0	0	0	0	0	0	0	0	0	0	0	0	0	0	0	0	0	0	0	0	0	0	0	0	0	0	0
Aldolase 4b y	0	0	s−1	0	0	0	0	0	0	0	0	0	0	0	0	0	0	0	0	0	0	0	0	0	0	0	0	0	0	0	0	0	0	0	0	0	0	0	0	0	0	0	0	0	0	0	0	0	0
Sedoheptulose-1,7-phosphatase 1 y	0	0	L·mol−1·s−1	0	0	0	0	0	0	0	0	0	0	0	0	0	0	0	0	0	0	0	0	0	0	0	0	0	0	0	0	0	0	0	0	0	0	0	0	0	0	0	0	0	0	0	0	0	0
Sedoheptulose-1,7-phosphatase 1 y_rev	0	0	s−1	0	0	0	0	0	0	0	0	0	0	0	0	0	0	0	0	0	0	0	0	0	0	0	0	0	0	0	0	0	0	0	0	0	0	0	0	0	0	0	0	0	0	0	0	0	0
Sedoheptulose-1,7-phosphatase 2 y	0	0	s−1	0	0	0	0	0	0	0	0	0	0	0	0	0	0	0	0	0	0	0	0	0	0	0	0	0	0	0	0	0	0	0	0	0	0	0	0	0	0	0	0	0	0	0	0	0	0
Transketolase 1b y	0	0	L2·mol−2·s−1	0	0	0	0	0	0	0	0	0	0	0	0	0	0	0	0	0	0	0	0	0	0	0	0	0	0	0	0	0	0	0	0	0	0	0	0	0	0	0	0	0	0	0	0	0	0
Transketolase 1b y_rev	0	0	s−1	0	0	0	0	0	0	0	0	0	0	0	0	0	0	0	0	0	0	0	0	0	0	0	0	0	0	0	0	0	0	0	0	0	0	0	0	0	0	0	0	0	0	0	0	0	0
Transketolase 2b y	0	0	s−1	0	0	0	0	0	0	0	0	0	0	0	0	0	0	0	0	0	0	0	0	0	0	0	0	0	0	0	0	0	0	0	0	0	0	0	0	0	0	0	0	0	0	0	0	0	0
Transketolase 3b y	0	0	L2·mol−2·s−1	0	0	0	0	0	0	0	0	0	0	0	0	0	0	0	0	0	0	0	0	0	0	0	0	0	0	0	0	0	0	0	0	0	0	0	0	0	0	0	0	0	0	0	0	0	0
Transketolase 3b y_rev	0	0	s−1	0	0	0	0	0	0	0	0	0	0	0	0	0	0	0	0	0	0	0	0	0	0	0	0	0	0	0	0	0	0	0	0	0	0	0	0	0	0	0	0	0	0	0	0	0	0
Transketolase 4b y	0	0	s−1	0	0	0	0	0	0	0	0	0	0	0	0	0	0	0	0	0	0	0	0	0	0	0	0	0	0	0	0	0	0	0	0	0	0	0	0	0	0	0	0	0	0	0	0	0	0
Ribulose-5-phosphate epimerase 1 y	0	0	L·mol−1·s−1	0	0	0	0	0	0	0	0	0	0	0	0	0	0	0	0	0	0	0	0	0	0	0	0	0	0	0	0	0	0	0	0	0	0	0	0	0	0	0	0	0	0	0	0	0	0
Ribulose-5-phosphate epimerase 1 y_rev	0	0	s−1	0	0	0	0	0	0	0	0	0	0	0	0	0	0	0	0	0	0	0	0	0	0	0	0	0	0	0	0	0	0	0	0	0	0	0	0	0	0	0	0	0	0	0	0	0	0
Ribulose-5-phosphate epimerase 2 y	0	0	s−1	0	0	0	0	0	0	0	0	0	0	0	0	0	0	0	0	0	0	0	0	0	0	0	0	0	0	0	0	0	0	0	0	0	0	0	0	0	0	0	0	0	0	0	0	0	0
Ribulose-5-phosphate epimerase 3 y	0	0	L·mol−1·s−1	0	0	0	0	0	0	0	0	0	0	0	0	0	0	0	0	0	0	0	0	0	0	0	0	0	0	0	0	0	0	0	0	0	0	0	0	0	0	0	0	0	0	0	0	0	0
Ribulose-5-phosphate epimerase 3 y_rev	0	0	s−1	0	0	0	0	0	0	0	0	0	0	0	0	0	0	0	0	0	0	0	0	0	0	0	0	0	0	0	0	0	0	0	0	0	0	0	0	0	0	0	0	0	0	0	0	0	0
Ribulose-5-phosphate epimerase 4 y	0	0	s−1	0	0	0	0	0	0	0	0	0	0	0	0	0	0	0	0	0	0	0	0	0	0	0	0	0	0	0	0	0	0	0	0	0	0	0	0	0	0	0	0	0	0	0	0	0	0
Ribose-5-phosphate isomerase 1 y	0	0	L·mol−1·s−1	0	0	0	0	0	0	0	0	0	0	0	0	0	0	0	0	0	0	0	0	0	0	0	0	0	0	0	0	0	0	0	0	0	0	0	0	0	0	0	0	0	0	0	0	0	0
Ribose-5-phosphate isomerase 1 y_rev	0	0	s−1	0	0	0	0	0	0	0	0	0	0	0	0	0	0	0	0	0	0	0	0	0	0	0	0	0	0	0	0	0	0	0	0	0	0	0	0	0	0	0	0	0	0	0	0	0	0
Ribose-5-phosphate isomerase 2 y	0	0	s−1	0	0	0	0	0	0	0	0	0	0	0	0	0	0	0	0	0	0	0	0	0	0	0	0	0	0	0	0	0	0	0	0	0	0	0	0	0	0	0	0	0	0	0	0	0	0
Ribose-5-phosphate isomerase 3 y	0	0	L·mol−1·s−1	0	0	0	0	0	0	0	0	0	0	0	0	0	0	0	0	0	0	0	0	0	0	0	0	0	0	0	0	0	0	0	0	0	0	0	0	0	0	0	0	0	0	0	0	0	0
Ribose-5-phosphate isomerase 3 y_rev	0	0	s−1	0	0	0	0	0	0	0	0	0	0	0	0	0	0	0	0	0	0	0	0	0	0	0	0	0	0	0	0	0	0	0	0	0	0	0	0	0	0	0	0	0	0	0	0	0	0
Ribose-5-phosphate isomerase 4 y	0	0	s−1	0	0	0	0	0	0	0	0	0	0	0	0	0	0	0	0	0	0	0	0	0	0	0	0	0	0	0	0	0	0	0	0	0	0	0	0	0	0	0	0	0	0	0	0	0	0
Phosphoribulokinase 1 y	0	0	L2·mol−2·s−1	0	0	0	0	0	0	0	0	0	0	0	0	0	0	0	0	0	0	0	0	0	0	0	0	0	0	0	0	0	0	0	0	0	0	0	0	0	0	0	0	0	0	0	0	0	0
Phosphoribulokinase 1 y_rev	0	0	s−1	0	0	0	0	0	0	0	0	0	0	0	0	0	0	0	0	0	0	0	0	0	0	0	0	0	0	0	0	0	0	0	0	0	0	0	0	0	0	0	0	0	0	0	0	0	0
Phosphoribulokinase 2 y	0	0	s−1	0	0	0	0	0	0	0	0	0	0	0	0	0	0	0	0	0	0	0	0	0	0	0	0	0	0	0	0	0	0	0	0	0	0	0	0	0	0	0	0	0	0	0	0	0	0
Phosphoglucoisomerase 1 y	0	0	L·mol−1·s−1	0	0	0	0	0	0	0	0	0	0	0	0	0	0	0	0	0	0	0	0	0	0	0	0	0	0	0	0	0	0	0	0	0	0	0	0	0	0	0	0	0	0	0	0	0	0
Phosphoglucoisomerase 1 y_rev	0	0	s−1	0	0	0	0	0	0	0	0	0	0	0	0	0	0	0	0	0	0	0	0	0	0	0	0	0	0	0	0	0	0	0	0	0	0	0	0	0	0	0	0	0	0	0	0	0	0
Phosphoglucoisomerase 2 y	0	0	s−1	0	0	0	0	0	0	0	0	0	0	0	0	0	0	0	0	0	0	0	0	0	0	0	0	0	0	0	0	0	0	0	0	0	0	0	0	0	0	0	0	0	0	0	0	0	0
Phosphoglucoisomerase 3 y	0	0	L·mol−1·s−1	0	0	0	0	0	0	0	0	0	0	0	0	0	0	0	0	0	0	0	0	0	0	0	0	0	0	0	0	0	0	0	0	0	0	0	0	0	0	0	0	0	0	0	0	0	0
Phosphoglucoisomerase 3 y_rev	0	0	s−1	0	0	0	0	0	0	0	0	0	0	0	0	0	0	0	0	0	0	0	0	0	0	0	0	0	0	0	0	0	0	0	0	0	0	0	0	0	0	0	0	0	0	0	0	0	0
Phosphoglucoisomerase 4 y	0	0	s−1	0	0	0	0	0	0	0	0	0	0	0	0	0	0	0	0	0	0	0	0	0	0	0	0	0	0	0	0	0	0	0	0	0	0	0	0	0	0	0	0	0	0	0	0	0	0
Phosphoglucomutase 1 y	0	0	L·mol−1·s−1	0	0	0	0	0	0	0	0	0	0	0	0	0	0	0	0	0	0	0	0	0	0	0	0	0	0	0	0	0	0	0	0	0	0	0	0	0	0	0	0	0	0	0	0	0	0
Phosphoglucomutase 1 y_rev	0	0	s−1	0	0	0	0	0	0	0	0	0	0	0	0	0	0	0	0	0	0	0	0	0	0	0	0	0	0	0	0	0	0	0	0	0	0	0	0	0	0	0	0	0	0	0	0	0	0
Phosphoglucomutase 2 y	0	0	s−1	0	0	0	0	0	0	0	0	0	0	0	0	0	0	0	0	0	0	0	0	0	0	0	0	0	0	0	0	0	0	0	0	0	0	0	0	0	0	0	0	0	0	0	0	0	0
Phosphoglucomutase 3 y	0	0	L·mol−1·s−1	0	0	0	0	0	0	0	0	0	0	0	0	0	0	0	0	0	0	0	0	0	0	0	0	0	0	0	0	0	0	0	0	0	0	0	0	0	0	0	0	0	0	0	0	0	0
Phosphoglucomutase 3 y_rev	0	0	s−1	0	0	0	0	0	0	0	0	0	0	0	0	0	0	0	0	0	0	0	0	0	0	0	0	0	0	0	0	0	0	0	0	0	0	0	0	0	0	0	0	0	0	0	0	0	0
Phosphoglucomutase 4 y	0	0	s−1	0	0	0	0	0	0	0	0	0	0	0	0	0	0	0	0	0	0	0	0	0	0	0	0	0	0	0	0	0	0	0	0	0	0	0	0	0	0	0	0	0	0	0	0	0	0
Glucose-1-phosphate adenylyltransferase 1 y	0	0	L2·mol−2·s−1	0	0	0	0	0	0	0	0	0	0	0	0	0	0	0	0	0	0	0	0	0	0	0	0	0	0	0	0	0	0	0	0	0	0	0	0	0	0	0	0	0	0	0	0	0	0
Glucose-1-phosphate adenylyltransferase 1 y_rev	0	0	s−1	0	0	0	0	0	0	0	0	0	0	0	0	0	0	0	0	0	0	0	0	0	0	0	0	0	0	0	0	0	0	0	0	0	0	0	0	0	0	0	0	0	0	0	0	0	0
Glucose-1-phosphate adenylyltransferase 2 y	0	0	s−1	0	0	0	0	0	0	0	0	0	0	0	0	0	0	0	0	0	0	0	0	0	0	0	0	0	0	0	0	0	0	0	0	0	0	0	0	0	0	0	0	0	0	0	0	0	0
Glucose-1-phosphate adenylyltransferase 3 y	0	0	L2·mol−2·s−1	0	0	0	0	0	0	0	0	0	0	0	0	0	0	0	0	0	0	0	0	0	0	0	0	0	0	0	0	0	0	0	0	0	0	0	0	0	0	0	0	0	0	0	0	0	0
Glucose-1-phosphate adenylyltransferase 3 y_rev	0	0	s−1	0	0	0	0	0	0	0	0	0	0	0	0	0	0	0	0	0	0	0	0	0	0	0	0	0	0	0	0	0	0	0	0	0	0	0	0	0	0	0	0	0	0	0	0	0	0
Glucose-1-phosphate adenylyltransferase 4 y	0	0	s−1	0	0	0	0	0	0	0	0	0	0	0	0	0	0	0	0	0	0	0	0	0	0	0	0	0	0	0	0	0	0	0	0	0	0	0	0	0	0	0	0	0	0	0	0	0	0
ADPGstore y	0	0	s−1	0	0	0	0	0	0	0	0	0	0	0	0	0	0	0	0	0	0	0	0	0	0	0	0	0	0	0	0	0	0	0	0	0	0	0	0	0	0	0	0	0	0	0	0	0	0
ADPGstore y_rev	0	0	µmol·L−1·s−1	0	0	0	0	0	0	0	0	0	0	0	0	0	0	0	0	0	0	0	0	0	0	0	0	0	0	0	0	0	0	0	0	0	0	0	0	0	0	0	0	0	0	0	0	0	0
Diffusion RuBP	10000	0	s−1	10000	10000	10000	10000	10000	10000	10000	10000	10000	10000	10000	10000	10000	10000	10000	10000	10000	10000	10000	10000	10000	10000	10000	10000	10000	10000	10000	10000	10000	10000	10000	10000	10000	10000	10000	10000	10000	10000	10000	10000	10000	10000	10000	10000	10000	10000
Diffusion RuBP_rev	9378.14	1941.81	s−1	10000	10000	10000	10000	904.961	10000	10000	10000	10000	10000	10000	72.0734	3301.14	10000	10000	10000	10000	1425.99	10000	10000	10000	10000	10000	10000	10000	10000	10000	10000	813.696	10000	10000	10000	10000	10000	10000	10000	10000	10000	10000	10000	10000	10000	10000	10000	10000	10000
Diffusion 3PGA	0.45813	0.267902	s−1	0.667709	0.256213	0.175385	0.619481	0.555355	0.712908	0.483993	0.59481	0.574033	0.791694	0.401256	0.00192987	0.236287	0.283179	0.216627	0.0583756	0.0636867	0.349157	0.409446	0.180207	0.722439	0.525563	0.183618	0.0219572	0.0701682	0.919051	0.0690435	0.694878	0.0233914	0.790293	0.123808	0.343751	0.366715	0.791278	0.680258	0.924584	0.360567	0.233475	0.639823	0.59975	0.00946386	0.30982	0.883503	0.758191	0.171209	0.61661
Diffusion 3PGA_rev	1.36126	0.267909	s−1	1.57071	1.15943	1.07859	1.52268	1.45846	1.61619	1.38695	1.49806	1.47728	1.69489	1.3044	0.904922	1.1395	1.18638	1.11994	0.961697	0.966672	1.25233	1.31244	1.08344	1.62562	1.42853	1.08663	0.92504	0.973214	1.82218	0.971999	1.5982	0.926389	1.69351	1.027	1.247	1.26967	1.69438	1.58335	1.8277	1.26383	1.13659	1.543	1.50276	0.912682	1.21294	1.78672	1.66119	1.07434	1.5197
Diffusion GAP	0	0	s−1	0	0	0	0	0	0	0	0	0	0	0	0	0	0	0	0	0	0	0	0	0	0	0	0	0	0	0	0	0	0	0	0	0	0	0	0	0	0	0	0	0	0	0	0	0	0
Diffusion GAP_rev	0	0	s−1	0	0	0	0	0	0	0	0	0	0	0	0	0	0	0	0	0	0	0	0	0	0	0	0	0	0	0	0	0	0	0	0	0	0	0	0	0	0	0	0	0	0	0	0	0	0
Diffusion DHAP	0	0	s−1	0	0	0	0	0	0	0	0	0	0	0	0	0	0	0	0	0	0	0	0	0	0	0	0	0	0	0	0	0	0	0	0	0	0	0	0	0	0	0	0	0	0	0	0	0	0
Diffusion DHAP_rev	0	0	s−1	0	0	0	0	0	0	0	0	0	0	0	0	0	0	0	0	0	0	0	0	0	0	0	0	0	0	0	0	0	0	0	0	0	0	0	0	0	0	0	0	0	0	0	0	0	0
Diffusion FBP	0	0	s−1	0	0	0	0	0	0	0	0	0	0	0	0	0	0	0	0	0	0	0	0	0	0	0	0	0	0	0	0	0	0	0	0	0	0	0	0	0	0	0	0	0	0	0	0	0	0
Diffusion FBP_rev	0	0	s−1	0	0	0	0	0	0	0	0	0	0	0	0	0	0	0	0	0	0	0	0	0	0	0	0	0	0	0	0	0	0	0	0	0	0	0	0	0	0	0	0	0	0	0	0	0	0
Diffusion F6P	0	0	s−1	0	0	0	0	0	0	0	0	0	0	0	0	0	0	0	0	0	0	0	0	0	0	0	0	0	0	0	0	0	0	0	0	0	0	0	0	0	0	0	0	0	0	0	0	0	0
Diffusion F6P_rev	0	0	s−1	0	0	0	0	0	0	0	0	0	0	0	0	0	0	0	0	0	0	0	0	0	0	0	0	0	0	0	0	0	0	0	0	0	0	0	0	0	0	0	0	0	0	0	0	0	0
Diffusion E4P	0	0	s−1	0	0	0	0	0	0	0	0	0	0	0	0	0	0	0	0	0	0	0	0	0	0	0	0	0	0	0	0	0	0	0	0	0	0	0	0	0	0	0	0	0	0	0	0	0	0
Diffusion E4P_rev	0	0	s−1	0	0	0	0	0	0	0	0	0	0	0	0	0	0	0	0	0	0	0	0	0	0	0	0	0	0	0	0	0	0	0	0	0	0	0	0	0	0	0	0	0	0	0	0	0	0
Diffusion Xu5P	0	0	s−1	0	0	0	0	0	0	0	0	0	0	0	0	0	0	0	0	0	0	0	0	0	0	0	0	0	0	0	0	0	0	0	0	0	0	0	0	0	0	0	0	0	0	0	0	0	0
Diffusion Xu5P_rev	0	0	s−1	0	0	0	0	0	0	0	0	0	0	0	0	0	0	0	0	0	0	0	0	0	0	0	0	0	0	0	0	0	0	0	0	0	0	0	0	0	0	0	0	0	0	0	0	0	0
Diffusion SBP	0	0	s−1	0	0	0	0	0	0	0	0	0	0	0	0	0	0	0	0	0	0	0	0	0	0	0	0	0	0	0	0	0	0	0	0	0	0	0	0	0	0	0	0	0	0	0	0	0	0
Diffusion SBP_rev	0	0	s−1	0	0	0	0	0	0	0	0	0	0	0	0	0	0	0	0	0	0	0	0	0	0	0	0	0	0	0	0	0	0	0	0	0	0	0	0	0	0	0	0	0	0	0	0	0	0
Diffusion S7P	0	0	s−1	0	0	0	0	0	0	0	0	0	0	0	0	0	0	0	0	0	0	0	0	0	0	0	0	0	0	0	0	0	0	0	0	0	0	0	0	0	0	0	0	0	0	0	0	0	0
Diffusion S7P_rev	0	0	s−1	0	0	0	0	0	0	0	0	0	0	0	0	0	0	0	0	0	0	0	0	0	0	0	0	0	0	0	0	0	0	0	0	0	0	0	0	0	0	0	0	0	0	0	0	0	0
Diffusion R5P	0	0	s−1	0	0	0	0	0	0	0	0	0	0	0	0	0	0	0	0	0	0	0	0	0	0	0	0	0	0	0	0	0	0	0	0	0	0	0	0	0	0	0	0	0	0	0	0	0	0
Diffusion R5P_rev	0	0	s−1	0	0	0	0	0	0	0	0	0	0	0	0	0	0	0	0	0	0	0	0	0	0	0	0	0	0	0	0	0	0	0	0	0	0	0	0	0	0	0	0	0	0	0	0	0	0
Diffusion Ru5P	0	0	s−1	0	0	0	0	0	0	0	0	0	0	0	0	0	0	0	0	0	0	0	0	0	0	0	0	0	0	0	0	0	0	0	0	0	0	0	0	0	0	0	0	0	0	0	0	0	0
Diffusion Ru5P_rev	0	0	s−1	0	0	0	0	0	0	0	0	0	0	0	0	0	0	0	0	0	0	0	0	0	0	0	0	0	0	0	0	0	0	0	0	0	0	0	0	0	0	0	0	0	0	0	0	0	0
Diffusion BPGA	0	0	s−1	0	0	0	0	0	0	0	0	0	0	0	0	0	0	0	0	0	0	0	0	0	0	0	0	0	0	0	0	0	0	0	0	0	0	0	0	0	0	0	0	0	0	0	0	0	0
Diffusion BPGA_rev	0	0	s−1	0	0	0	0	0	0	0	0	0	0	0	0	0	0	0	0	0	0	0	0	0	0	0	0	0	0	0	0	0	0	0	0	0	0	0	0	0	0	0	0	0	0	0	0	0	0
Diffusion G1P	0	0	s−1	0	0	0	0	0	0	0	0	0	0	0	0	0	0	0	0	0	0	0	0	0	0	0	0	0	0	0	0	0	0	0	0	0	0	0	0	0	0	0	0	0	0	0	0	0	0
Diffusion G1P_rev	0	0	s−1	0	0	0	0	0	0	0	0	0	0	0	0	0	0	0	0	0	0	0	0	0	0	0	0	0	0	0	0	0	0	0	0	0	0	0	0	0	0	0	0	0	0	0	0	0	0
Diffusion G6P	0	0	s−1	0	0	0	0	0	0	0	0	0	0	0	0	0	0	0	0	0	0	0	0	0	0	0	0	0	0	0	0	0	0	0	0	0	0	0	0	0	0	0	0	0	0	0	0	0	0
Diffusion G6P_rev	0	0	s−1	0	0	0	0	0	0	0	0	0	0	0	0	0	0	0	0	0	0	0	0	0	0	0	0	0	0	0	0	0	0	0	0	0	0	0	0	0	0	0	0	0	0	0	0	0	0
Diffusion ADPG	0	0	s−1	0	0	0	0	0	0	0	0	0	0	0	0	0	0	0	0	0	0	0	0	0	0	0	0	0	0	0	0	0	0	0	0	0	0	0	0	0	0	0	0	0	0	0	0	0	0
Diffusion ADPG_rev	0	0	s−1	0	0	0	0	0	0	0	0	0	0	0	0	0	0	0	0	0	0	0	0	0	0	0	0	0	0	0	0	0	0	0	0	0	0	0	0	0	0	0	0	0	0	0	0	0	0
FNR	10000	0	s−1	10000	10000	10000	10000	10000	10000	10000	10000	10000	10000	10000	10000	10000	10000	10000	10000	10000	10000	10000	10000	10000	10000	10000	10000	10000	10000	10000	10000	10000	10000	10000	10000	10000	10000	10000	10000	10000	10000	10000	10000	10000	10000	10000	10000	10000	10000
ATPase	637.812	944.164	s−1	1534.06	740.994	414.972	1638.01	598.764	1028.43	404.633	6949.06	1427.21	467.751	1158.93	429.842	839.039	564.154	553.578	795.919	647.728	438.75	394.986	1227.61	631.313	7508.36	568.421	780.935	605.783	386.884	443.958	908.077	3598.07	1616.88	755.969	821.069	625.043	399.223	1152.67	715.455	3958.33	1119.13	764.2	1338.87	966.051	1368	811.371	2883.7	895.917	703.877
Diffusion ADP	0	0	s−1	0	0	0	0	0	0	0	0	0	0	0	0	0	0	0	0	0	0	0	0	0	0	0	0	0	0	0	0	0	0	0	0	0	0	0	0	0	0	0	0	0	0	0	0	0	0
Diffusion ADP_rev	0	0	s−1	0	0	0	0	0	0	0	0	0	0	0	0	0	0	0	0	0	0	0	0	0	0	0	0	0	0	0	0	0	0	0	0	0	0	0	0	0	0	0	0	0	0	0	0	0	0
Diffusion ATP	0	0	s−1	0	0	0	0	0	0	0	0	0	0	0	0	0	0	0	0	0	0	0	0	0	0	0	0	0	0	0	0	0	0	0	0	0	0	0	0	0	0	0	0	0	0	0	0	0	0
Diffusion ATP_rev	0	0	s−1	0	0	0	0	0	0	0	0	0	0	0	0	0	0	0	0	0	0	0	0	0	0	0	0	0	0	0	0	0	0	0	0	0	0	0	0	0	0	0	0	0	0	0	0	0	0
Diffusion NADP	0	0	s−1	0	0	0	0	0	0	0	0	0	0	0	0	0	0	0	0	0	0	0	0	0	0	0	0	0	0	0	0	0	0	0	0	0	0	0	0	0	0	0	0	0	0	0	0	0	0
Diffusion NADP_rev	0	0	s−1	0	0	0	0	0	0	0	0	0	0	0	0	0	0	0	0	0	0	0	0	0	0	0	0	0	0	0	0	0	0	0	0	0	0	0	0	0	0	0	0	0	0	0	0	0	0
Diffusion NADPH	0	0	s−1	0	0	0	0	0	0	0	0	0	0	0	0	0	0	0	0	0	0	0	0	0	0	0	0	0	0	0	0	0	0	0	0	0	0	0	0	0	0	0	0	0	0	0	0	0	0
Diffusion NADPH_rev	0	0	s−1	0	0	0	0	0	0	0	0	0	0	0	0	0	0	0	0	0	0	0	0	0	0	0	0	0	0	0	0	0	0	0	0	0	0	0	0	0	0	0	0	0	0	0	0	0	0
Diffusion DHAP s-c	1.1692	0.665051	s−1	1.15357	2.21627	0.201974	0.0674441	1.44327	0.197909	0.884056	0.483689	0.960181	1.5635	1.18504	1.31378	0.754063	1.69955	0.181377	0.894628	0.081067	1.60384	1.89431	1.28849	0.326914	2.06354	1.55367	1.04633	2.13909	0.151468	1.11942	1.60787	0.75074	1.21595	1.03337	2.34761	1.21809	1.64629	1.88605	1.09877	1.97414	0.121852	0.842929	1.99643	0.572791	0.0726497	1.91511	0.959951	0.334566	0.697059
Diffusion DHAP s-c_rev	557.604	260.064	µmol·L−1·s−1	981.408	792.351	172.031	130.23	446.17	36.3243	957.676	102.157	514.543	470.093	410.757	184.198	378.577	805.668	199.996	636.158	340.107	771.417	740.765	693.586	18.5553	527.814	925.101	608.451	866.658	269.484	238.259	434.721	167.311	731.45	559.721	919.736	571.537	683.015	959.323	406.911	993.158	339.361	240.543	603.319	198.949	382.921	733.593	870.433	34.2844	592.03
Diffusion BPGA s-c	810.171	455.655	s−1	1065.05	1164.84	89.4818	1530.71	1436.35	1164.32	446.465	398.029	153.125	1489.47	1060.92	1083.13	1391.88	204.205	1313.49	1137.12	1488.93	1166.54	1511.98	160.048	1315.73	377.941	1259.67	225.113	545.834	1327.71	819.841	1608.33	582.392	981.092	540.1	945.963	1098.07	398.528	290.667	233.364	808.47	954.369	1218.78	359.058	1324.89	1181.47	475.336	346.564	83.7099	322.925
Diffusion BPGA s-c_rev	525.2	268.649	µmol·L−1·s−1	924.262	653.141	150.461	859.968	907.724	666.118	392.398	245.246	72.39	972.194	570.119	649.711	830.495	265.721	807.352	725.76	970.227	733.17	832.737	238.318	875.46	264.209	698.539	179.062	322.805	899.374	623.34	912.837	225.582	801.795	408.081	555.138	528.262	292.866	368.111	52.8786	520.635	528.625	776.21	208.82	809.066	634.195	260.731	176.816	57.8743	96.1756
Diffusion GAP s-c	9.50448	4.52962	s−1	13.9718	3.94316	2.96316	8.14231	7.08925	2.94881	11.8206	4.52834	8.49987	3.2382	9.81228	7.5758	11.2392	0.367501	5.59199	12.956	4.75959	3.16624	5.43248	14.6221	9.42143	7.45976	14.7659	9.09436	16.5116	13.704	2.98555	4.48947	16.9614	12.377	4.35848	3.4303	12.9602	4.81299	15.2396	7.76733	10.5997	16.1161	15.7732	10.8309	6.59667	16.7859	9.1369	12.5278	14.7201	15.0799
Diffusion GAP s-c_rev	427.117	256.733	µmol·L−1·s−1	754.831	126.691	144.034	155.34	535.747	43.2018	210.091	244.042	195.977	402.487	392.831	673.97	466.506	54.6719	133.427	455.481	23.9639	15.2644	86.4399	828.043	729.364	683.059	336.966	299.725	820.258	690.882	532.43	269.731	752.285	790.959	155.141	83.7656	300.858	239.961	943.317	183.036	370.456	447.405	998.935	688.117	339.637	366.869	393.725	55.2874	840.021	243.334
Diffusion 3PGA s-c	0.962178	0.496416	s−1	1.13264	1.52023	0.314009	0.055868	0.497525	0.229945	0.663008	1.55131	1.00709	1.45585	1.20588	1.69393	0.778811	1.67125	0.288855	0.90975	1.52901	0.254194	1.46782	0.899747	1.27964	0.814148	1.01547	1.78191	0.0316885	0.770549	0.982973	1.02775	1.23147	1.22809	1.51071	0.634677	0.38251	0.844679	0.913205	0.265398	0.381326	0.87545	0.818874	0.354579	0.865396	1.66416	0.161412	0.982831	0.940058	0.630204
Diffusion 3PGA s-c_rev	476.123	267.884	µmol·L−1·s−1	320.002	861.114	73.3582	71.5232	208.942	144.578	231.775	834.575	566.646	698.059	711.636	911.12	413.303	765.376	123.262	439.442	739.585	92.0485	857.296	346.289	596.486	402.004	596.42	924.659	15.7665	302.148	395.01	594.054	788.437	445.07	733.237	347.617	326.587	402.106	300.719	229.141	163.101	510.309	387.533	195.796	442.495	968.293	107.047	562.866	503.768	437.397
[truncated: 954 more columns]

## Sheet: F_KM_estimation
Supplementary Table 6F. Estimates of KM value for Rubisco in the stroma and pyrenoid.
KM RuBP estimates:
given v=kcat*E0*substrate/(KM+substrate)
we calculate KM = ((kcat*E0*substrate)/v) - substrate
Note that the model reaction related to RubisCo, actually models two Rubisco subunits.
	average	standard deviation	SAMPLE 1	SAMPLE 2	SAMPLE 3	SAMPLE 4	SAMPLE 5	SAMPLE 6	SAMPLE 7	SAMPLE 8	SAMPLE 9	SAMPLE 10	SAMPLE 11	SAMPLE 12	SAMPLE 13	SAMPLE 14	SAMPLE 15	SAMPLE 16	SAMPLE 17	SAMPLE 18	SAMPLE 19	SAMPLE 20	SAMPLE 21	SAMPLE 22	SAMPLE 23	SAMPLE 24	SAMPLE 25	SAMPLE 26	SAMPLE 27	SAMPLE 28	SAMPLE 29	SAMPLE 30	SAMPLE 31	SAMPLE 32	SAMPLE 33	SAMPLE 34	SAMPLE 35	SAMPLE 36	SAMPLE 37	SAMPLE 38	SAMPLE 39	SAMPLE 40	SAMPLE 41	SAMPLE 42	SAMPLE 43	SAMPLE 44	SAMPLE 45	SAMPLE 46	SAMPLE 47
v stroma			151.915	151.856	151.861	151.861	151.886	151.839	151.927	151.847	151.847	151.861	151.877	151.917	151.858	151.862	151.83	151.828	151.919	151.868	151.916	151.851	151.867	151.924	151.911	151.893	151.903	151.881	151.927	151.828	151.916	151.856	151.862	151.847	151.928	151.888	151.891	151.884	151.845	151.884	151.867	151.911	151.856	151.882	151.856	151.916	151.881	151.891	151.867
kcat stroma			5.8	5.8	5.8	5.8	5.8	5.8	5.8	5.8	5.8	5.8	5.8	5.8	5.8	5.8	5.8	5.8	5.8	5.8	5.8	5.8	5.8	5.8	5.8	5.8	5.8	5.8	5.8	5.8	5.8	5.8	5.8	5.8	5.8	5.8	5.8	5.8	5.8	5.8	5.8	5.8	5.8	5.8	5.8	5.8	5.8	5.8	5.8
v pyrenoid			246.085	246.144	246.139	246.139	246.114	246.161	246.073	246.153	246.153	246.139	246.123	246.083	246.142	246.138	246.17	246.172	246.081	246.132	246.084	246.149	246.133	246.076	246.089	246.107	246.097	246.119	246.073	246.172	246.084	246.144	246.138	246.153	246.072	246.112	246.109	246.116	246.155	246.116	246.133	246.089	246.144	246.118	246.144	246.084	246.119	246.109	246.133
kcat pyrenoid			0.12975	0.12975	0.12975	0.12975	0.12975	0.12975	0.12975	0.12975	0.12975	0.12975	0.12975	0.12975	0.12975	0.12975	0.12975	0.12975	0.12975	0.12975	0.12975	0.12975	0.12975	0.12975	0.12975	0.12975	0.12975	0.12975	0.12975	0.12975	0.12975	0.12975	0.12975	0.12975	0.12975	0.12975	0.12975	0.12975	0.12975	0.12975	0.12975	0.12975	0.12975	0.12975	0.12975	0.12975	0.12975	0.12975	0.12975
E0 stroma			49.9484	34.42	38.5409	31.6138	64.6707	41.4024	32.1161	32.2511	39.2314	34.2057	51.8203	49.0072	40.978	35.8611	33.9278	33.5189	40.3086	40.1804	31.5426	32.2006	33.4451	35.549	35.993	34.4997	34.6737	33.8577	35.9038	29.9165	48.5917	31.8275	32.8822	29.8352	39.4187	78.3661	72.0581	38.5365	28.7882	36.1621	30.8883	35.965	44.1349	31.3214	31.5161	32.2303	38.6336	35.8753	50.5709
RuBP stroma			0.0545559	0.0568385	0.0585377	0.0949786	0.0255164	0.0979321	0.0753284	0.0782335	0.0357792	0.0693783	0.052348	0.0246803	0.0279153	0.0826705	0.0815814	0.0564549	0.0489345	0.0260392	0.063334	0.0402892	0.0652902	0.0918275	0.06449	0.0718336	0.0726605	0.0451952	0.0617226	0.0848887	0.0254221	0.0599229	0.0972112	0.0784178	0.0776004	0.0424921	0.0448134	0.0454295	0.0911658	0.0795853	0.0686047	0.0842567	0.0642163	0.0585087	0.0702571	0.0882924	0.0461668	0.0604711	0.0501169
E0 pyrenoid			2136.21	1945.92	1945.91	1913.01	2164.23	2000.41	1915.7	1917.45	1989.37	1923.91	2156.3	2020.88	1990.96	1932.4	1922.28	1926.06	1961.49	1988.81	1915.82	1935.59	1923.49	1929.11	1941.92	1924.72	1930.72	1953.97	1973.13	1908.92	2090.55	1918.91	1919.02	1909.34	1994.72	2392.67	2346.66	1958	1906.38	1969.1	1914.39	1947.23	1986.17	1917.64	1925.35	1915.67	1962.17	1940.28	2126.49
RuBP pyrenoid			0.0299474	0.0322241	0.0339237	0.0703647	0.01	0.073316	0.0507211	0.0536182	0.0111639	0.0447643	0.0277357	0.01	0.01	0.0580567	0.0569645	0.0318377	0.0243265	0.01	0.0387257	0.0156743	0.0406769	0.0672199	0.0398811	0.0472229	0.0480508	0.0205834	0.0371153	0.0602714	0.01	0.0353085	0.0725974	0.0538025	0.0529931	0.0178809	0.0202025	0.0208179	0.0665502	0.0549737	0.0439914	0.0596478	0.0396019	0.0338969	0.0456427	0.0636841	0.0215548	0.0358602	0.0255035
KM stroma	0.0265846	0.0150702	0.0494817	0.0178838	0.0276291	0.019701	0.0374976	0.0569479	0.0170298	0.0181403	0.0178358	0.0212585	0.051246	0.0214973	0.0157747	0.0305572	0.024153	0.0158335	0.0263712	0.0139189	0.0129367	0.00926292	0.0181058	0.0327967	0.0241333	0.0227975	0.0235362	0.0132397	0.0228787	0.0121259	0.0217404	0.0129208	0.0248721	0.0109469	0.0391767	0.0846651	0.0784934	0.0214245	0.00908199	0.030316	0.0123257	0.0314403	0.0440327	0.0114729	0.0143135	0.0203533	0.0219447	0.022369	0.0466774
KM pyrenoid	0.00127455	0.00108253	0.0037835	0.000830048	0.000874335	0.000592927	0.00140974	0.00398903	0.000513208	0.000574512	0.000542787	0.000634411	0.00379299	0.000655392	0.00049508	0.00108321	0.000751415	0.000482977	0.000832774	0.000484145	0.000392637	0.000318059	0.000568693	0.00115439	0.000952326	0.000695769	0.000862086	0.000619718	0.00149959	0.000369877	0.00102267	0.000406803	0.000842259	0.00034631	0.0027445	0.00467444	0.00479153	0.000671199	0.000323881	0.00209429	0.000403926	0.00159147	0.00186031	0.00037134	0.000680686	0.000640639	0.000742088	0.000822227	0.00308576
[truncated: 953 more columns]
